# Supplementary material for: GLO-Roots: an imaging platform enabling multidimensional characterization of soil-grown root systems
Source: eLife. 2015 Aug 19;4:e07597. doi: 10.7554/eLife.07597 (PMC4589753; doi:10.7554/eLife.07597)
Supplement: Figure 2—source data 1. — DOI: http://dx.doi.org/10.7554/eLife.07597.018 [file elife07597s007.xlsx]

## Sheet: Figure 2C
	experiment	plant	das	angle	count
1	9	10	11	90	0.402621
2	9	10	11	88	0.0689505
3	9	10	11	86	0.102648
4	9	10	11	84	0.145955
5	9	10	11	82	0.208142
6	9	10	11	80	0.408283
7	9	10	11	78	0.370055
8	9	10	11	76	0.371953
9	9	10	11	74	0.368538
10	9	10	11	72	0.304852
11	9	10	11	70	0.282805
12	9	10	11	68	0.562746
13	9	10	11	66	0.571744
14	9	10	11	64	0.601626
15	9	10	11	62	0.303902
16	9	10	11	60	0.501024
17	9	10	11	58	0.460902
18	9	10	11	56	0.5302
19	9	10	11	54	0.497801
20	9	10	11	52	0.366065
21	9	10	11	50	0.625396
22	9	10	11	48	0.75836
23	9	10	11	46	0.839707
24	9	10	11	44	0.743867
25	9	10	11	42	0.973881
26	9	10	11	40	1.00857
27	9	10	11	38	1.43097
28	9	10	11	36	1.59922
29	9	10	11	34	1.34181
30	9	10	11	32	1.04099
31	9	10	11	30	1.33905
32	9	10	11	28	1.33445
33	9	10	11	26	1.5747
34	9	10	11	24	2.52065
35	9	10	11	22	2.9396
36	9	10	11	20	2.32242
37	9	10	11	18	2.95432
38	9	10	11	16	2.29756
39	9	10	11	14	3.54518
40	9	10	11	12	2.84985
41	9	10	11	10	3.54149
42	9	10	11	8	2.01315
43	9	10	11	6	3.49038
44	9	10	11	4	2.48735
45	9	10	11	2	2.04443
46	9	10	11	1.27222e-13	3.33027
47	9	10	11	2	2.17128
48	9	10	11	4	2.23812
49	9	10	11	6	1.77929
50	9	10	11	8	3.15125
51	9	10	11	10	2.60688
52	9	10	11	12	3.44747
53	9	10	11	14	1.96106
54	9	10	11	16	2.28298
55	9	10	11	18	1.75678
56	9	10	11	20	1.60043
57	9	10	11	22	1.36681
58	9	10	11	24	1.3814
59	9	10	11	26	1.18255
60	9	10	11	28	1.19297
61	9	10	11	30	1.22536
62	9	10	11	32	1.65058
63	9	10	11	34	1.14988
64	9	10	11	36	0.790885
65	9	10	11	38	0.962781
66	9	10	11	40	0.843357
67	9	10	11	42	0.588906
68	9	10	11	44	0.786855
69	9	10	11	46	0.233053
70	9	10	11	48	0.233325
71	9	10	11	50	0.206351
72	9	10	11	52	0.159262
73	9	10	11	54	0.273254
74	9	10	11	56	0.15122
75	9	10	11	58	0.482276
76	9	10	11	60	0.115543
77	9	10	11	62	0.381905
78	9	10	11	64	0.284847
79	9	10	11	66	0.25069
80	9	10	11	68	0.238189
81	9	10	11	70	0.237396
82	9	10	11	72	0.547975
83	9	10	11	74	0.14447
84	9	10	11	76	0.498723
85	9	10	11	78	0.188372
86	9	10	11	80	0.259408
87	9	10	11	82	0.197854
88	9	10	11	84	0.206445
89	9	10	11	86	0.108781
90	9	10	11	88	0.104341
91	9	10	12	90	0.501607
92	9	10	12	88	0.106644
93	9	10	12	86	0.173481
94	9	10	12	84	0.207063
95	9	10	12	82	0.185291
96	9	10	12	80	0.247008
97	9	10	12	78	0.413882
98	9	10	12	76	0.19034
99	9	10	12	74	0.530598
100	9	10	12	72	0.317305
101	9	10	12	70	0.379782
102	9	10	12	68	0.376707
103	9	10	12	66	0.379177
104	9	10	12	64	0.550648
105	9	10	12	62	0.211202
106	9	10	12	60	0.577172
107	9	10	12	58	0.538661
108	9	10	12	56	0.708933
109	9	10	12	54	0.843827
110	9	10	12	52	0.593003
111	9	10	12	50	0.705681
112	9	10	12	48	0.865158
113	9	10	12	46	1.01433
114	9	10	12	44	1.24149
115	9	10	12	42	1.29793
116	9	10	12	40	1.55064
117	9	10	12	38	1.27898
118	9	10	12	36	1.2718
119	9	10	12	34	1.36981
120	9	10	12	32	1.49738
121	9	10	12	30	1.8546
122	9	10	12	28	1.71501
123	9	10	12	26	1.90249
124	9	10	12	24	1.72901
125	9	10	12	22	2.78594
126	9	10	12	20	2.44165
127	9	10	12	18	3.17717
128	9	10	12	16	2.02487
129	9	10	12	14	2.45325
130	9	10	12	12	2.39486
131	9	10	12	10	2.62824
132	9	10	12	8	1.28645
133	9	10	12	6	2.38476
134	9	10	12	4	2.97418
135	9	10	12	2	3.04506
136	9	10	12	1.27222e-13	4.43965
137	9	10	12	2	2.90076
138	9	10	12	4	2.67212
139	9	10	12	6	1.91653
140	9	10	12	8	2.70092
141	9	10	12	10	2.33796
142	9	10	12	12	1.28349
143	9	10	12	14	1.28217
144	9	10	12	16	1.26786
145	9	10	12	18	1.70616
146	9	10	12	20	1.43131
147	9	10	12	22	1.36459
148	9	10	12	24	1.31828
149	9	10	12	26	1.14483
150	9	10	12	28	1.15582
151	9	10	12	30	1.26709
152	9	10	12	32	1.09509
153	9	10	12	34	1.15576
154	9	10	12	36	0.672045
155	9	10	12	38	0.739554
156	9	10	12	40	0.951783
157	9	10	12	42	0.514324
158	9	10	12	44	0.779023
159	9	10	12	46	0.440838
160	9	10	12	48	0.722108
161	9	10	12	50	0.5703
162	9	10	12	52	0.459054
163	9	10	12	54	0.542365
164	9	10	12	56	0.465655
165	9	10	12	58	0.669146
166	9	10	12	60	0.29434
167	9	10	12	62	0.567749
168	9	10	12	64	0.429533
169	9	10	12	66	0.519375
170	9	10	12	68	0.306433
171	9	10	12	70	0.385714
172	9	10	12	72	0.578053
173	9	10	12	74	0.325772
174	9	10	12	76	0.202024
175	9	10	12	78	0.295113
176	9	10	12	80	0.334606
177	9	10	12	82	0.133636
178	9	10	12	84	0.226283
179	9	10	12	86	0.321538
180	9	10	12	88	0.190202
181	9	10	13	90	1.20252
182	9	10	13	88	0.792226
183	9	10	13	86	0.917486
184	9	10	13	84	0.872984
185	9	10	13	82	1.15462
186	9	10	13	80	0.886238
187	9	10	13	78	1.06918
188	9	10	13	76	0.703076
189	9	10	13	74	0.863113
190	9	10	13	72	0.634038
191	9	10	13	70	0.6964
192	9	10	13	68	0.587242
193	9	10	13	66	0.411096
194	9	10	13	64	0.573085
195	9	10	13	62	0.507414
196	9	10	13	60	0.448367
197	9	10	13	58	0.53028
198	9	10	13	56	0.733981
199	9	10	13	54	0.758627
200	9	10	13	52	0.965905
201	9	10	13	50	0.868938
202	9	10	13	48	0.886825
203	9	10	13	46	1.06003
204	9	10	13	44	1.4101
205	9	10	13	42	0.982822
206	9	10	13	40	1.20593
207	9	10	13	38	1.0302
208	9	10	13	36	0.906154
209	9	10	13	34	1.29945
210	9	10	13	32	1.26662
211	9	10	13	30	1.27833
212	9	10	13	28	1.49602
213	9	10	13	26	1.03281
214	9	10	13	24	1.13056
215	9	10	13	22	1.30353
216	9	10	13	20	1.44471
217	9	10	13	18	1.54312
218	9	10	13	16	1.65526
219	9	10	13	14	1.85657
220	9	10	13	12	1.51716
221	9	10	13	10	1.82503
222	9	10	13	8	1.5238
223	9	10	13	6	1.86328
224	9	10	13	4	1.59558
225	9	10	13	2	2.8311
226	9	10	13	1.27222e-13	4.15641
227	9	10	13	2	2.41711
228	9	10	13	4	1.81887
229	9	10	13	6	1.83746
230	9	10	13	8	2.82423
231	9	10	13	10	2.0369
232	9	10	13	12	2.19236
233	9	10	13	14	1.6608
234	9	10	13	16	1.62469
235	9	10	13	18	1.18671
236	9	10	13	20	1.62346
237	9	10	13	22	1.25731
238	9	10	13	24	1.41919
239	9	10	13	26	0.801145
240	9	10	13	28	0.997408
241	9	10	13	30	0.728177
242	9	10	13	32	0.826834
243	9	10	13	34	0.850784
244	9	10	13	36	0.597656
245	9	10	13	38	0.464079
246	9	10	13	40	0.559754
247	9	10	13	42	0.411928
248	9	10	13	44	0.881305
249	9	10	13	46	0.506578
250	9	10	13	48	0.586366
251	9	10	13	50	0.635577
252	9	10	13	52	0.592074
253	9	10	13	54	0.817191
254	9	10	13	56	0.74885
255	9	10	13	58	1.02434
256	9	10	13	60	1.22687
257	9	10	13	62	0.803378
258	9	10	13	64	0.699731
259	9	10	13	66	0.952754
260	9	10	13	68	0.853922
261	9	10	13	70	0.645504
262	9	10	13	72	0.66605
263	9	10	13	74	0.614273
264	9	10	13	76	0.649089
265	9	10	13	78	0.74181
266	9	10	13	80	0.536885
267	9	10	13	82	0.633732
268	9	10	13	84	0.967319
269	9	10	13	86	0.887304
270	9	10	13	88	0.914026
271	9	10	14	90	1.10477
272	9	10	14	88	1.08407
273	9	10	14	86	0.809832
274	9	10	14	84	0.929141
275	9	10	14	82	1.18981
276	9	10	14	80	0.741193
277	9	10	14	78	0.705525
278	9	10	14	76	0.635854
279	9	10	14	74	0.655358
280	9	10	14	72	0.598046
281	9	10	14	70	0.616252
282	9	10	14	68	0.584706
283	9	10	14	66	0.654296
284	9	10	14	64	0.54405
285	9	10	14	62	0.607163
286	9	10	14	60	0.565585
287	9	10	14	58	0.848239
288	9	10	14	56	0.670485
289	9	10	14	54	0.784854
290	9	10	14	52	0.783194
291	9	10	14	50	0.953029
292	9	10	14	48	0.843579
293	9	10	14	46	0.91497
294	9	10	14	44	0.93195
295	9	10	14	42	1.19872
296	9	10	14	40	1.15162
297	9	10	14	38	1.25932
298	9	10	14	36	1.12563
299	9	10	14	34	1.36534
300	9	10	14	32	1.3677
301	9	10	14	30	1.64911
302	9	10	14	28	1.6759
303	9	10	14	26	1.61856
304	9	10	14	24	1.7595
305	9	10	14	22	1.71883
306	9	10	14	20	1.37279
307	9	10	14	18	1.37506
308	9	10	14	16	1.47555
309	9	10	14	14	1.79702
310	9	10	14	12	1.63846
311	9	10	14	10	1.52786
312	9	10	14	8	1.24704
313	9	10	14	6	1.59902
314	9	10	14	4	1.8591
315	9	10	14	2	2.01309
316	9	10	14	1.27222e-13	2.85358
317	9	10	14	2	1.49139
318	9	10	14	4	2.25795
319	9	10	14	6	2.16182
320	9	10	14	8	2.19724
321	9	10	14	10	1.59554
322	9	10	14	12	2.03682
323	9	10	14	14	1.19622
324	9	10	14	16	1.25997
325	9	10	14	18	1.30597
326	9	10	14	20	1.14852
327	9	10	14	22	1.02297
328	9	10	14	24	1.16172
329	9	10	14	26	1.05855
330	9	10	14	28	0.936734
331	9	10	14	30	0.919751
332	9	10	14	32	0.973398
333	9	10	14	34	0.913994
334	9	10	14	36	0.750261
335	9	10	14	38	0.70656
336	9	10	14	40	0.658332
337	9	10	14	42	0.639353
338	9	10	14	44	0.891322
339	9	10	14	46	0.897781
340	9	10	14	48	0.956864
341	9	10	14	50	0.749019
342	9	10	14	52	0.775847
343	9	10	14	54	0.86479
344	9	10	14	56	0.907478
345	9	10	14	58	0.833821
346	9	10	14	60	0.852411
347	9	10	14	62	0.827101
348	9	10	14	64	0.777954
349	9	10	14	66	0.848414
350	9	10	14	68	0.915687
351	9	10	14	70	0.935591
352	9	10	14	72	1.07847
353	9	10	14	74	0.926112
354	9	10	14	76	1.0234
355	9	10	14	78	0.708293
356	9	10	14	80	0.993449
357	9	10	14	82	0.805648
358	9	10	14	84	0.886935
359	9	10	14	86	0.935013
360	9	10	14	88	0.810811
361	9	10	15	90	0.79541
362	9	10	15	88	0.602491
363	9	10	15	86	0.704859
364	9	10	15	84	0.588807
365	9	10	15	82	0.688889
366	9	10	15	80	0.638951
367	9	10	15	78	0.769525
368	9	10	15	76	0.754131
369	9	10	15	74	1.10853
370	9	10	15	72	0.952707
371	9	10	15	70	1.11262
372	9	10	15	68	0.81411
373	9	10	15	66	0.83482
374	9	10	15	64	1.03451
375	9	10	15	62	1.05072
376	9	10	15	60	1.19197
377	9	10	15	58	1.10733
378	9	10	15	56	1.02157
379	9	10	15	54	1.07276
380	9	10	15	52	1.10542
381	9	10	15	50	1.02504
382	9	10	15	48	0.894393
383	9	10	15	46	1.03828
384	9	10	15	44	0.903652
385	9	10	15	42	0.845016
386	9	10	15	40	0.826134
387	9	10	15	38	1.01952
388	9	10	15	36	0.978282
389	9	10	15	34	0.842031
390	9	10	15	32	1.01169
391	9	10	15	30	0.90735
392	9	10	15	28	0.922938
393	9	10	15	26	1.24765
394	9	10	15	24	1.32295
395	9	10	15	22	1.64759
396	9	10	15	20	1.1558
397	9	10	15	18	1.53078
398	9	10	15	16	1.38088
399	9	10	15	14	2.2172
400	9	10	15	12	1.51957
401	9	10	15	10	2.0163
402	9	10	15	8	1.36996
403	9	10	15	6	1.76182
404	9	10	15	4	1.28437
405	9	10	15	2	1.52645
406	9	10	15	1.27222e-13	1.66235
407	9	10	15	2	1.3173
408	9	10	15	4	2.06544
409	9	10	15	6	1.32644
410	9	10	15	8	1.69985
411	9	10	15	10	1.52243
412	9	10	15	12	1.5382
413	9	10	15	14	1.0352
414	9	10	15	16	1.14284
415	9	10	15	18	0.871402
416	9	10	15	20	0.987068
417	9	10	15	22	0.928076
418	9	10	15	24	1.08034
419	9	10	15	26	1.03308
420	9	10	15	28	1.23434
421	9	10	15	30	1.06239
422	9	10	15	32	0.917559
423	9	10	15	34	1.25925
424	9	10	15	36	1.00282
425	9	10	15	38	0.653322
426	9	10	15	40	0.969286
427	9	10	15	42	0.783074
428	9	10	15	44	0.923206
429	9	10	15	46	0.991967
430	9	10	15	48	1.19164
431	9	10	15	50	1.03025
432	9	10	15	52	0.863741
433	9	10	15	54	1.17382
434	9	10	15	56	1.40957
435	9	10	15	58	1.29945
436	9	10	15	60	1.6019
437	9	10	15	62	1.27051
438	9	10	15	64	1.2432
439	9	10	15	66	1.45435
440	9	10	15	68	1.28164
441	9	10	15	70	1.18887
442	9	10	15	72	1.26449
443	9	10	15	74	1.10284
444	9	10	15	76	1.39758
445	9	10	15	78	0.744936
446	9	10	15	80	0.690988
447	9	10	15	82	0.609611
448	9	10	15	84	0.747251
449	9	10	15	86	0.63801
450	9	10	15	88	0.642323
451	9	10	16	90	1.17295
452	9	10	16	88	0.799834
453	9	10	16	86	1.01236
454	9	10	16	84	0.832085
455	9	10	16	82	1.03254
456	9	10	16	80	1.18424
457	9	10	16	78	1.63345
458	9	10	16	76	1.35976
459	9	10	16	74	1.17408
460	9	10	16	72	1.15477
461	9	10	16	70	0.940658
462	9	10	16	68	1.21067
463	9	10	16	66	1.21664
464	9	10	16	64	1.23519
465	9	10	16	62	1.22116
466	9	10	16	60	1.3763
467	9	10	16	58	1.6892
468	9	10	16	56	1.28627
469	9	10	16	54	1.66681
470	9	10	16	52	1.362
471	9	10	16	50	1.39681
472	9	10	16	48	0.989745
473	9	10	16	46	1.1904
474	9	10	16	44	0.97762
475	9	10	16	42	1.02937
476	9	10	16	40	0.880213
477	9	10	16	38	0.846004
478	9	10	16	36	0.749472
479	9	10	16	34	0.765936
480	9	10	16	32	0.909133
481	9	10	16	30	1.05227
482	9	10	16	28	1.00366
483	9	10	16	26	0.981447
484	9	10	16	24	1.09044
485	9	10	16	22	1.18506
486	9	10	16	20	1.19885
487	9	10	16	18	1.55978
488	9	10	16	16	1.16056
489	9	10	16	14	1.58679
490	9	10	16	12	1.39728
491	9	10	16	10	1.41178
492	9	10	16	8	1.08714
493	9	10	16	6	1.12259
494	9	10	16	4	1.17028
495	9	10	16	2	1.40261
496	9	10	16	1.27222e-13	1.53133
497	9	10	16	2	1.28027
498	9	10	16	4	1.21062
499	9	10	16	6	0.964602
500	9	10	16	8	1.46647
501	9	10	16	10	1.35199
502	9	10	16	12	1.67439
503	9	10	16	14	1.14077
504	9	10	16	16	1.07488
505	9	10	16	18	0.877144
506	9	10	16	20	0.962916
507	9	10	16	22	0.997385
508	9	10	16	24	0.960678
509	9	10	16	26	0.896044
510	9	10	16	28	0.737487
511	9	10	16	30	0.725075
512	9	10	16	32	0.892179
513	9	10	16	34	0.884772
514	9	10	16	36	0.887372
515	9	10	16	38	0.801272
516	9	10	16	40	0.809996
517	9	10	16	42	0.773175
518	9	10	16	44	1.13512
519	9	10	16	46	0.842163
520	9	10	16	48	0.779019
521	9	10	16	50	0.783645
522	9	10	16	52	0.821819
523	9	10	16	54	1.24569
524	9	10	16	56	1.20939
525	9	10	16	58	1.13601
526	9	10	16	60	1.15017
527	9	10	16	62	1.28734
528	9	10	16	64	1.29972
529	9	10	16	66	1.24361
530	9	10	16	68	1.24951
531	9	10	16	70	1.19205
532	9	10	16	72	1.20228
533	9	10	16	74	1.17514
534	9	10	16	76	1.28377
535	9	10	16	78	0.959929
536	9	10	16	80	1.0284
537	9	10	16	82	0.696474
538	9	10	16	84	1.06709
539	9	10	16	86	0.783918
540	9	10	16	88	0.820742
541	9	10	17	90	0.981138
542	9	10	17	88	0.730305
543	9	10	17	86	0.753285
544	9	10	17	84	0.887729
545	9	10	17	82	0.883768
546	9	10	17	80	1.0302
547	9	10	17	78	0.937355
548	9	10	17	76	0.905697
549	9	10	17	74	1.00299
550	9	10	17	72	1.04268
551	9	10	17	70	1.23996
552	9	10	17	68	1.28546
553	9	10	17	66	1.32354
554	9	10	17	64	1.54253
555	9	10	17	62	1.53608
556	9	10	17	60	1.50661
557	9	10	17	58	1.68554
558	9	10	17	56	1.79834
559	9	10	17	54	1.6431
560	9	10	17	52	1.40793
561	9	10	17	50	1.40143
562	9	10	17	48	1.26399
563	9	10	17	46	1.43083
564	9	10	17	44	1.10271
565	9	10	17	42	1.33016
566	9	10	17	40	1.18267
567	9	10	17	38	1.23997
568	9	10	17	36	1.14399
569	9	10	17	34	0.98362
570	9	10	17	32	1.02922
571	9	10	17	30	1.20507
572	9	10	17	28	1.10451
573	9	10	17	26	1.36455
574	9	10	17	24	1.08048
575	9	10	17	22	1.14135
576	9	10	17	20	1.1981
577	9	10	17	18	1.33353
578	9	10	17	16	1.47018
579	9	10	17	14	1.61393
580	9	10	17	12	1.34865
581	9	10	17	10	1.3958
582	9	10	17	8	1.18754
583	9	10	17	6	1.19699
584	9	10	17	4	1.2454
585	9	10	17	2	1.31811
586	9	10	17	1.27222e-13	1.32043
587	9	10	17	2	0.876269
588	9	10	17	4	1.2466
589	9	10	17	6	1.03031
590	9	10	17	8	1.39189
591	9	10	17	10	1.22405
592	9	10	17	12	1.41277
593	9	10	17	14	1.11014
594	9	10	17	16	1.11641
595	9	10	17	18	1.12413
596	9	10	17	20	0.906252
597	9	10	17	22	1.01473
598	9	10	17	24	1.03562
599	9	10	17	26	0.837745
600	9	10	17	28	0.704292
601	9	10	17	30	0.769732
602	9	10	17	32	0.77747
603	9	10	17	34	0.807056
604	9	10	17	36	0.709701
605	9	10	17	38	0.757936
606	9	10	17	40	0.9997
607	9	10	17	42	0.861394
608	9	10	17	44	0.847852
609	9	10	17	46	0.785542
610	9	10	17	48	0.969979
611	9	10	17	50	0.770503
612	9	10	17	52	0.841234
613	9	10	17	54	0.93972
614	9	10	17	56	1.18094
615	9	10	17	58	1.17743
616	9	10	17	60	1.1318
617	9	10	17	62	0.974678
618	9	10	17	64	1.15032
619	9	10	17	66	0.989097
620	9	10	17	68	1.06513
621	9	10	17	70	0.942347
622	9	10	17	72	1.11663
623	9	10	17	74	1.19067
624	9	10	17	76	1.17372
625	9	10	17	78	0.886218
626	9	10	17	80	0.904123
627	9	10	17	82	0.95786
628	9	10	17	84	0.919711
629	9	10	17	86	0.753744
630	9	10	17	88	0.85913
631	9	10	18	90	0.80685
632	9	10	18	88	0.515746
633	9	10	18	86	0.596965
634	9	10	18	84	0.553025
635	9	10	18	82	0.631836
636	9	10	18	80	0.741892
637	9	10	18	78	0.918212
638	9	10	18	76	0.981864
639	9	10	18	74	1.11421
640	9	10	18	72	1.0708
641	9	10	18	70	1.24755
642	9	10	18	68	1.45019
643	9	10	18	66	1.43733
644	9	10	18	64	1.1536
645	9	10	18	62	1.63424
646	9	10	18	60	1.39599
647	9	10	18	58	1.87353
648	9	10	18	56	1.64617
649	9	10	18	54	1.64799
650	9	10	18	52	1.33632
651	9	10	18	50	1.33204
652	9	10	18	48	1.37552
653	9	10	18	46	1.57488
654	9	10	18	44	1.12721
655	9	10	18	42	1.20663
656	9	10	18	40	1.01946
657	9	10	18	38	1.27135
658	9	10	18	36	1.27796
659	9	10	18	34	1.1095
660	9	10	18	32	1.04965
661	9	10	18	30	1.0122
662	9	10	18	28	1.17664
663	9	10	18	26	1.22585
664	9	10	18	24	1.25949
665	9	10	18	22	1.10452
666	9	10	18	20	1.37718
667	9	10	18	18	1.56058
668	9	10	18	16	1.45058
669	9	10	18	14	1.58299
670	9	10	18	12	1.3141
671	9	10	18	10	1.32893
672	9	10	18	8	1.36185
673	9	10	18	6	1.36974
674	9	10	18	4	1.62411
675	9	10	18	2	1.68034
676	9	10	18	1.27222e-13	1.62111
677	9	10	18	2	1.07249
678	9	10	18	4	1.13041
679	9	10	18	6	0.960555
680	9	10	18	8	1.08959
681	9	10	18	10	0.996761
682	9	10	18	12	1.34724
683	9	10	18	14	1.13793
684	9	10	18	16	1.10326
685	9	10	18	18	1.06075
686	9	10	18	20	1.00297
687	9	10	18	22	1.07445
688	9	10	18	24	1.20937
689	9	10	18	26	1.08061
690	9	10	18	28	0.94707
691	9	10	18	30	0.905604
692	9	10	18	32	1.15247
693	9	10	18	34	1.15262
694	9	10	18	36	1.0176
695	9	10	18	38	0.806444
696	9	10	18	40	0.950604
697	9	10	18	42	0.95578
698	9	10	18	44	1.02302
699	9	10	18	46	0.806251
700	9	10	18	48	0.888837
701	9	10	18	50	0.803411
702	9	10	18	52	1.10152
703	9	10	18	54	1.25346
704	9	10	18	56	1.17429
705	9	10	18	58	0.998666
706	9	10	18	60	1.06053
707	9	10	18	62	1.15158
708	9	10	18	64	1.2479
709	9	10	18	66	0.775828
710	9	10	18	68	1.09912
711	9	10	18	70	0.919803
712	9	10	18	72	0.720283
713	9	10	18	74	0.835563
714	9	10	18	76	0.738577
715	9	10	18	78	0.712699
716	9	10	18	80	0.761876
717	9	10	18	82	0.59972
718	9	10	18	84	0.727771
719	9	10	18	86	0.775989
720	9	10	18	88	0.520037
721	9	10	19	90	0.572192
722	9	10	19	88	0.469321
723	9	10	19	86	0.576568
724	9	10	19	84	0.667876
725	9	10	19	82	0.715522
726	9	10	19	80	0.647995
727	9	10	19	78	1.07411
728	9	10	19	76	0.89096
729	9	10	19	74	0.946157
730	9	10	19	72	1.0297
731	9	10	19	70	1.44716
732	9	10	19	68	1.4953
733	9	10	19	66	1.40843
734	9	10	19	64	1.19449
735	9	10	19	62	1.40177
736	9	10	19	60	1.29439
737	9	10	19	58	1.48072
738	9	10	19	56	1.54509
739	9	10	19	54	1.32809
740	9	10	19	52	1.19912
741	9	10	19	50	1.27338
742	9	10	19	48	1.24767
743	9	10	19	46	1.73052
744	9	10	19	44	1.24022
745	9	10	19	42	1.3131
746	9	10	19	40	1.21216
747	9	10	19	38	1.18697
748	9	10	19	36	1.44157
749	9	10	19	34	1.23189
750	9	10	19	32	1.27117
751	9	10	19	30	1.31524
752	9	10	19	28	1.18826
753	9	10	19	26	1.23454
754	9	10	19	24	1.19924
755	9	10	19	22	1.34273
756	9	10	19	20	1.24715
757	9	10	19	18	1.25696
758	9	10	19	16	1.26318
759	9	10	19	14	1.41524
760	9	10	19	12	1.00723
761	9	10	19	10	1.1985
762	9	10	19	8	0.971644
763	9	10	19	6	0.906889
764	9	10	19	4	1.10165
765	9	10	19	2	1.23959
766	9	10	19	1.27222e-13	1.54885
767	9	10	19	2	1.22585
768	9	10	19	4	1.18814
769	9	10	19	6	0.9373
770	9	10	19	8	1.27704
771	9	10	19	10	1.08679
772	9	10	19	12	1.28484
773	9	10	19	14	1.17504
774	9	10	19	16	1.30342
775	9	10	19	18	1.25606
776	9	10	19	20	1.05414
777	9	10	19	22	1.20483
778	9	10	19	24	1.06197
779	9	10	19	26	1.01692
780	9	10	19	28	1.02599
781	9	10	19	30	0.965582
782	9	10	19	32	0.947205
783	9	10	19	34	0.956203
784	9	10	19	36	0.895305
785	9	10	19	38	0.869027
786	9	10	19	40	0.984159
787	9	10	19	42	1.11723
788	9	10	19	44	1.67311
789	9	10	19	46	1.26858
790	9	10	19	48	1.19513
791	9	10	19	50	1.12153
792	9	10	19	52	1.11253
793	9	10	19	54	1.33738
794	9	10	19	56	1.31844
795	9	10	19	58	1.05773
796	9	10	19	60	1.04028
797	9	10	19	62	1.03159
798	9	10	19	64	1.21926
799	9	10	19	66	1.02862
800	9	10	19	68	1.1695
801	9	10	19	70	1.02165
802	9	10	19	72	0.970776
803	9	10	19	74	0.821881
804	9	10	19	76	0.709765
805	9	10	19	78	0.74781
806	9	10	19	80	0.778235
807	9	10	19	82	0.550672
808	9	10	19	84	0.703602
809	9	10	19	86	0.663499
810	9	10	19	88	0.654852
811	9	10	20	90	0.740591
812	9	10	20	88	0.575605
813	9	10	20	86	0.574728
814	9	10	20	84	0.676467
815	9	10	20	82	0.979946
816	9	10	20	80	0.892621
817	9	10	20	78	1.22796
818	9	10	20	76	1.06679
819	9	10	20	74	1.13872
820	9	10	20	72	1.27856
821	9	10	20	70	1.2434
822	9	10	20	68	1.20376
823	9	10	20	66	1.68008
824	9	10	20	64	1.5268
825	9	10	20	62	1.60033
826	9	10	20	60	1.19566
827	9	10	20	58	1.64675
828	9	10	20	56	1.59059
829	9	10	20	54	1.46418
830	9	10	20	52	1.43505
831	9	10	20	50	1.38079
832	9	10	20	48	1.38211
833	9	10	20	46	1.99792
834	9	10	20	44	1.21326
835	9	10	20	42	1.17583
836	9	10	20	40	0.993519
837	9	10	20	38	1.19827
838	9	10	20	36	1.22954
839	9	10	20	34	1.40249
840	9	10	20	32	1.46496
841	9	10	20	30	1.2677
842	9	10	20	28	1.27168
843	9	10	20	26	1.58514
844	9	10	20	24	1.46421
845	9	10	20	22	1.20912
846	9	10	20	20	1.3396
847	9	10	20	18	1.27977
848	9	10	20	16	1.4833
849	9	10	20	14	1.63316
850	9	10	20	12	1.22161
851	9	10	20	10	1.13603
852	9	10	20	8	1.0784
853	9	10	20	6	0.989316
854	9	10	20	4	1.27941
855	9	10	20	2	1.5224
856	9	10	20	1.27222e-13	2.32925
857	9	10	20	2	1.04887
858	9	10	20	4	0.903195
859	9	10	20	6	0.882678
860	9	10	20	8	0.981445
861	9	10	20	10	0.775898
862	9	10	20	12	1.0835
863	9	10	20	14	0.811725
864	9	10	20	16	1.09169
865	9	10	20	18	0.915809
866	9	10	20	20	1.12715
867	9	10	20	22	1.15796
868	9	10	20	24	1.35556
869	9	10	20	26	1.22225
870	9	10	20	28	1.29867
871	9	10	20	30	1.17832
872	9	10	20	32	1.22907
873	9	10	20	34	1.30581
874	9	10	20	36	1.21992
875	9	10	20	38	0.965024
876	9	10	20	40	1.21683
877	9	10	20	42	1.15548
878	9	10	20	44	1.80336
879	9	10	20	46	1.03377
880	9	10	20	48	0.868852
881	9	10	20	50	0.921526
882	9	10	20	52	0.894192
883	9	10	20	54	0.846176
884	9	10	20	56	0.899562
885	9	10	20	58	0.884763
886	9	10	20	60	0.954581
887	9	10	20	62	0.669743
888	9	10	20	64	0.737824
889	9	10	20	66	0.699225
890	9	10	20	68	0.488129
891	9	10	20	70	0.649295
892	9	10	20	72	0.667367
893	9	10	20	74	0.522121
894	9	10	20	76	0.774086
895	9	10	20	78	0.638256
896	9	10	20	80	0.578691
897	9	10	20	82	0.626389
898	9	10	20	84	0.566918
899	9	10	20	86	0.577683
900	9	10	20	88	0.503258
901	9	10	21	90	0.583104
902	9	10	21	88	0.411332
903	9	10	21	86	0.426047
904	9	10	21	84	0.512007
905	9	10	21	82	0.640502
906	9	10	21	80	0.750469
907	9	10	21	78	0.638826
908	9	10	21	76	0.790729
909	9	10	21	74	0.728232
910	9	10	21	72	0.785619
911	9	10	21	70	0.893409
912	9	10	21	68	0.911279
913	9	10	21	66	1.01303
914	9	10	21	64	1.13987
915	9	10	21	62	1.07991
916	9	10	21	60	1.1059
917	9	10	21	58	1.40742
918	9	10	21	56	1.29729
919	9	10	21	54	1.16938
920	9	10	21	52	1.12868
921	9	10	21	50	1.24664
922	9	10	21	48	1.43035
923	9	10	21	46	1.59946
924	9	10	21	44	1.31409
925	9	10	21	42	1.07357
926	9	10	21	40	1.0764
927	9	10	21	38	1.26319
928	9	10	21	36	1.44979
929	9	10	21	34	1.27639
930	9	10	21	32	1.33262
931	9	10	21	30	1.31879
932	9	10	21	28	1.48681
933	9	10	21	26	1.65203
934	9	10	21	24	1.31759
935	9	10	21	22	1.36648
936	9	10	21	20	1.21839
937	9	10	21	18	1.48134
938	9	10	21	16	1.59702
939	9	10	21	14	1.85037
940	9	10	21	12	1.69413
941	9	10	21	10	1.32982
942	9	10	21	8	1.15487
943	9	10	21	6	1.40236
944	9	10	21	4	1.4064
945	9	10	21	2	1.68264
946	9	10	21	1.27222e-13	2.44937
947	9	10	21	2	1.52761
948	9	10	21	4	1.42
949	9	10	21	6	1.45965
950	9	10	21	8	1.43419
951	9	10	21	10	1.51742
952	9	10	21	12	2.12292
953	9	10	21	14	1.68425
954	9	10	21	16	1.58168
955	9	10	21	18	1.39678
956	9	10	21	20	1.33842
957	9	10	21	22	1.31926
958	9	10	21	24	1.6253
959	9	10	21	26	1.28921
960	9	10	21	28	1.29774
961	9	10	21	30	1.27701
962	9	10	21	32	1.38285
963	9	10	21	34	1.12916
964	9	10	21	36	0.949255
965	9	10	21	38	0.999345
966	9	10	21	40	0.850669
967	9	10	21	42	0.96366
968	9	10	21	44	1.35964
969	9	10	21	46	0.923455
970	9	10	21	48	0.763128
971	9	10	21	50	0.859062
972	9	10	21	52	0.721421
973	9	10	21	54	0.76681
974	9	10	21	56	0.796997
975	9	10	21	58	0.64953
976	9	10	21	60	0.876411
977	9	10	21	62	0.83508
978	9	10	21	64	0.753014
979	9	10	21	66	0.820146
980	9	10	21	68	0.782774
981	9	10	21	70	0.665376
982	9	10	21	72	0.846247
983	9	10	21	74	0.643944
984	9	10	21	76	0.590453
985	9	10	21	78	0.582786
986	9	10	21	80	0.495812
987	9	10	21	82	0.404471
988	9	10	21	84	0.459078
989	9	10	21	86	0.460841
990	9	10	21	88	0.493195
991	9	6	11	90	0.346198
992	9	6	11	88	0.382867
993	9	6	11	86	0.487063
994	9	6	11	84	0.260605
995	9	6	11	82	0.360427
996	9	6	11	80	0.36025
997	9	6	11	78	0.228972
998	9	6	11	76	0.350677
999	9	6	11	74	0.410069
1000	9	6	11	72	0.46586
1001	9	6	11	70	0.259785
1002	9	6	11	68	0.215882
1003	9	6	11	66	0.593748
1004	9	6	11	64	0.612054
1005	9	6	11	62	0.485743
1006	9	6	11	60	0.512422
1007	9	6	11	58	0.424499
1008	9	6	11	56	0.565979
1009	9	6	11	54	0.41779
1010	9	6	11	52	0.285314
1011	9	6	11	50	0.496678
1012	9	6	11	48	0.412269
1013	9	6	11	46	0.764945
1014	9	6	11	44	0.572353
1015	9	6	11	42	0.739236
1016	9	6	11	40	0.836973
1017	9	6	11	38	0.807834
1018	9	6	11	36	0.856363
1019	9	6	11	34	0.78874
1020	9	6	11	32	1.06135
1021	9	6	11	30	1.04768
1022	9	6	11	28	0.820889
1023	9	6	11	26	0.712252
1024	9	6	11	24	0.992689
1025	9	6	11	22	1.56765
1026	9	6	11	20	1.10777
1027	9	6	11	18	1.81805
1028	9	6	11	16	1.59728
1029	9	6	11	14	1.8429
1030	9	6	11	12	1.70634
1031	9	6	11	10	2.47081
1032	9	6	11	8	1.54347
1033	9	6	11	6	2.97617
1034	9	6	11	4	2.86506
1035	9	6	11	2	3.38943
1036	9	6	11	1.27222e-13	4.43103
1037	9	6	11	2	3.13132
1038	9	6	11	4	3.42656
1039	9	6	11	6	2.7614
1040	9	6	11	8	3.1298
1041	9	6	11	10	2.45192
1042	9	6	11	12	3.04782
1043	9	6	11	14	2.29426
1044	9	6	11	16	1.85648
1045	9	6	11	18	2.1395
1046	9	6	11	20	1.88965
1047	9	6	11	22	1.76326
1048	9	6	11	24	1.94763
1049	9	6	11	26	1.57442
1050	9	6	11	28	1.45447
1051	9	6	11	30	1.42334
1052	9	6	11	32	1.37742
1053	9	6	11	34	1.42631
1054	9	6	11	36	0.839303
1055	9	6	11	38	0.835546
1056	9	6	11	40	0.672247
1057	9	6	11	42	0.761394
1058	9	6	11	44	1.20526
1059	9	6	11	46	0.552788
1060	9	6	11	48	1.02766
1061	9	6	11	50	0.615419
1062	9	6	11	52	1.04792
1063	9	6	11	54	1.0186
1064	9	6	11	56	0.908847
1065	9	6	11	58	0.784951
1066	9	6	11	60	0.697535
1067	9	6	11	62	0.763389
1068	9	6	11	64	0.414093
1069	9	6	11	66	0.476798
1070	9	6	11	68	0.273308
1071	9	6	11	70	0.446879
1072	9	6	11	72	0.523609
1073	9	6	11	74	0.628419
1074	9	6	11	76	0.374331
1075	9	6	11	78	0.322785
1076	9	6	11	80	0.408096
1077	9	6	11	82	0.25218
1078	9	6	11	84	0.180782
1079	9	6	11	86	0.303201
1080	9	6	11	88	0.316708
1081	9	6	12	90	0.379485
1082	9	6	12	88	0.359588
1083	9	6	12	86	0.548899
1084	9	6	12	84	0.45288
1085	9	6	12	82	0.444822
1086	9	6	12	80	0.657085
1087	9	6	12	78	0.829227
1088	9	6	12	76	0.703642
1089	9	6	12	74	0.673709
1090	9	6	12	72	0.666647
1091	9	6	12	70	0.642238
1092	9	6	12	68	0.578462
1093	9	6	12	66	0.71312
1094	9	6	12	64	0.70269
1095	9	6	12	62	0.51931
1096	9	6	12	60	0.647927
1097	9	6	12	58	0.782069
1098	9	6	12	56	0.687909
1099	9	6	12	54	0.883154
1100	9	6	12	52	0.542921
1101	9	6	12	50	0.698565
1102	9	6	12	48	0.750439
1103	9	6	12	46	0.769347
1104	9	6	12	44	0.607847
1105	9	6	12	42	0.523582
1106	9	6	12	40	0.99689
1107	9	6	12	38	0.790719
1108	9	6	12	36	0.645247
1109	9	6	12	34	0.80085
1110	9	6	12	32	0.748582
1111	9	6	12	30	0.927247
1112	9	6	12	28	1.34351
1113	9	6	12	26	2.00432
1114	9	6	12	24	1.1586
1115	9	6	12	22	1.51313
1116	9	6	12	20	1.91658
1117	9	6	12	18	1.67178
1118	9	6	12	16	1.32218
1119	9	6	12	14	1.90825
1120	9	6	12	12	1.76525
1121	9	6	12	10	2.45215
1122	9	6	12	8	1.81551
1123	9	6	12	6	2.84327
1124	9	6	12	4	2.44446
1125	9	6	12	2	1.90489
1126	9	6	12	1.27222e-13	4.45408
1127	9	6	12	2	2.77247
1128	9	6	12	4	2.33718
1129	9	6	12	6	1.92628
1130	9	6	12	8	2.71084
1131	9	6	12	10	2.34623
1132	9	6	12	12	2.83464
1133	9	6	12	14	1.46001
1134	9	6	12	16	1.34115
1135	9	6	12	18	1.57906
1136	9	6	12	20	2.59329
1137	9	6	12	22	1.64377
1138	9	6	12	24	2.12157
1139	9	6	12	26	1.58606
1140	9	6	12	28	1.49806
1141	9	6	12	30	1.30568
1142	9	6	12	32	1.006
1143	9	6	12	34	1.14129
1144	9	6	12	36	1.23111
1145	9	6	12	38	0.970741
1146	9	6	12	40	0.691032
1147	9	6	12	42	0.445566
1148	9	6	12	44	0.527866
1149	9	6	12	46	0.311875
1150	9	6	12	48	0.691717
1151	9	6	12	50	0.660933
1152	9	6	12	52	0.526646
1153	9	6	12	54	0.483734
1154	9	6	12	56	0.625005
1155	9	6	12	58	0.892558
1156	9	6	12	60	0.587919
1157	9	6	12	62	0.659091
1158	9	6	12	64	0.641583
1159	9	6	12	66	0.993216
1160	9	6	12	68	0.510742
1161	9	6	12	70	0.629654
1162	9	6	12	72	0.613146
1163	9	6	12	74	0.219722
1164	9	6	12	76	0.551828
1165	9	6	12	78	0.39305
1166	9	6	12	80	0.60063
1167	9	6	12	82	0.460008
1168	9	6	12	84	0.630806
1169	9	6	12	86	0.554129
1170	9	6	12	88	0.499063
1171	9	6	13	90	0.702751
1172	9	6	13	88	0.52488
1173	9	6	13	86	0.692445
1174	9	6	13	84	0.528833
1175	9	6	13	82	0.940512
1176	9	6	13	80	1.15969
1177	9	6	13	78	1.12108
1178	9	6	13	76	1.15917
1179	9	6	13	74	1.14316
1180	9	6	13	72	1.19834
1181	9	6	13	70	1.04638
1182	9	6	13	68	0.917729
1183	9	6	13	66	1.4449
1184	9	6	13	64	1.03076
1185	9	6	13	62	1.01498
1186	9	6	13	60	0.837036
1187	9	6	13	58	1.00258
1188	9	6	13	56	1.08132
1189	9	6	13	54	0.745654
1190	9	6	13	52	0.86287
1191	9	6	13	50	0.885444
1192	9	6	13	48	0.793963
1193	9	6	13	46	0.907324
1194	9	6	13	44	0.764429
1195	9	6	13	42	0.620682
1196	9	6	13	40	0.775828
1197	9	6	13	38	0.71563
1198	9	6	13	36	1.32655
1199	9	6	13	34	1.14904
1200	9	6	13	32	1.0777
1201	9	6	13	30	0.948887
1202	9	6	13	28	0.955231
1203	9	6	13	26	1.06532
1204	9	6	13	24	1.18905
1205	9	6	13	22	1.23561
1206	9	6	13	20	1.1621
1207	9	6	13	18	1.48003
1208	9	6	13	16	1.43138
1209	9	6	13	14	2.25226
1210	9	6	13	12	1.83606
1211	9	6	13	10	2.04621
1212	9	6	13	8	1.56086
1213	9	6	13	6	1.70117
1214	9	6	13	4	1.75129
1215	9	6	13	2	1.91886
1216	9	6	13	1.27222e-13	4.03661
1217	9	6	13	2	2.16506
1218	9	6	13	4	2.10858
1219	9	6	13	6	1.32801
1220	9	6	13	8	2.3215
1221	9	6	13	10	1.80961
1222	9	6	13	12	1.57638
1223	9	6	13	14	1.15381
1224	9	6	13	16	1.13844
1225	9	6	13	18	1.22305
1226	9	6	13	20	0.97424
1227	9	6	13	22	0.586656
1228	9	6	13	24	0.869551
1229	9	6	13	26	0.952303
1230	9	6	13	28	0.73157
1231	9	6	13	30	0.92497
1232	9	6	13	32	0.869066
1233	9	6	13	34	0.535869
1234	9	6	13	36	0.606129
1235	9	6	13	38	0.654265
1236	9	6	13	40	0.705884
1237	9	6	13	42	0.980286
1238	9	6	13	44	1.10761
1239	9	6	13	46	1.22136
1240	9	6	13	48	1.17997
1241	9	6	13	50	1.01787
1242	9	6	13	52	1.18091
1243	9	6	13	54	1.08241
1244	9	6	13	56	1.27914
1245	9	6	13	58	1.04733
1246	9	6	13	60	1.20959
1247	9	6	13	62	1.14893
1248	9	6	13	64	1.2909
1249	9	6	13	66	0.901909
1250	9	6	13	68	0.767579
1251	9	6	13	70	0.782313
1252	9	6	13	72	1.11676
1253	9	6	13	74	0.705307
1254	9	6	13	76	0.81076
1255	9	6	13	78	0.663426
1256	9	6	13	80	0.661503
1257	9	6	13	82	0.556553
1258	9	6	13	84	0.430873
1259	9	6	13	86	0.264386
1260	9	6	13	88	0.614782
1261	9	6	14	90	0.569762
1262	9	6	14	88	0.50037
1263	9	6	14	86	0.656535
1264	9	6	14	84	0.610017
1265	9	6	14	82	0.930078
1266	9	6	14	80	0.801283
1267	9	6	14	78	0.820082
1268	9	6	14	76	0.697173
1269	9	6	14	74	0.803887
1270	9	6	14	72	0.655543
1271	9	6	14	70	0.924625
1272	9	6	14	68	0.963858
1273	9	6	14	66	0.946774
1274	9	6	14	64	0.588787
1275	9	6	14	62	0.691836
1276	9	6	14	60	0.721925
1277	9	6	14	58	0.822503
1278	9	6	14	56	0.711049
1279	9	6	14	54	0.642994
1280	9	6	14	52	0.69179
1281	9	6	14	50	0.643881
1282	9	6	14	48	0.778625
1283	9	6	14	46	0.826766
1284	9	6	14	44	1.02725
1285	9	6	14	42	1.06816
1286	9	6	14	40	1.06107
1287	9	6	14	38	0.698967
1288	9	6	14	36	1.38401
1289	9	6	14	34	1.25811
1290	9	6	14	32	0.990051
1291	9	6	14	30	1.18542
1292	9	6	14	28	1.26356
1293	9	6	14	26	1.75852
1294	9	6	14	24	1.54757
1295	9	6	14	22	1.72152
1296	9	6	14	20	1.607
1297	9	6	14	18	1.75425
1298	9	6	14	16	1.65077
1299	9	6	14	14	2.81356
1300	9	6	14	12	1.65825
1301	9	6	14	10	1.74745
1302	9	6	14	8	1.40782
1303	9	6	14	6	1.41136
1304	9	6	14	4	1.36201
1305	9	6	14	2	1.47952
1306	9	6	14	1.27222e-13	1.79195
1307	9	6	14	2	1.50767
1308	9	6	14	4	1.36107
1309	9	6	14	6	1.73546
1310	9	6	14	8	2.1595
1311	9	6	14	10	1.65127
1312	9	6	14	12	1.49335
1313	9	6	14	14	1.06141
1314	9	6	14	16	1.14922
1315	9	6	14	18	1.21753
1316	9	6	14	20	1.98449
1317	9	6	14	22	1.31025
1318	9	6	14	24	1.11691
1319	9	6	14	26	0.961374
1320	9	6	14	28	0.97665
1321	9	6	14	30	0.887476
1322	9	6	14	32	1.1803
1323	9	6	14	34	0.796525
1324	9	6	14	36	0.950355
1325	9	6	14	38	0.797834
1326	9	6	14	40	1.06919
1327	9	6	14	42	0.994054
1328	9	6	14	44	0.746681
1329	9	6	14	46	0.868958
1330	9	6	14	48	0.959174
1331	9	6	14	50	1.1101
1332	9	6	14	52	1.19118
1333	9	6	14	54	1.17941
1334	9	6	14	56	1.23837
1335	9	6	14	58	1.17248
1336	9	6	14	60	1.29392
1337	9	6	14	62	1.19396
1338	9	6	14	64	1.20772
1339	9	6	14	66	1.07399
1340	9	6	14	68	1.2565
1341	9	6	14	70	0.982929
1342	9	6	14	72	0.946799
1343	9	6	14	74	0.97735
1344	9	6	14	76	1.14151
1345	9	6	14	78	0.965289
1346	9	6	14	80	0.813463
1347	9	6	14	82	0.655357
1348	9	6	14	84	0.670767
1349	9	6	14	86	0.659049
1350	9	6	14	88	0.684835
1351	9	6	15	90	0.818767
1352	9	6	15	88	0.689711
1353	9	6	15	86	0.650763
1354	9	6	15	84	0.592537
1355	9	6	15	82	0.736657
1356	9	6	15	80	0.871216
1357	9	6	15	78	1.30683
1358	9	6	15	76	1.08454
1359	9	6	15	74	0.953364
1360	9	6	15	72	0.833949
1361	9	6	15	70	1.0016
1362	9	6	15	68	0.866162
1363	9	6	15	66	1.03622
1364	9	6	15	64	0.836358
1365	9	6	15	62	0.997245
1366	9	6	15	60	0.901005
1367	9	6	15	58	1.15816
1368	9	6	15	56	0.96545
1369	9	6	15	54	0.941502
1370	9	6	15	52	0.744133
1371	9	6	15	50	1.05902
1372	9	6	15	48	0.741835
1373	9	6	15	46	1.03573
1374	9	6	15	44	0.973125
1375	9	6	15	42	1.1645
1376	9	6	15	40	1.21834
1377	9	6	15	38	0.796146
1378	9	6	15	36	1.09747
1379	9	6	15	34	1.05255
1380	9	6	15	32	1.16128
1381	9	6	15	30	1.27606
1382	9	6	15	28	1.10537
1383	9	6	15	26	1.13892
1384	9	6	15	24	1.27037
1385	9	6	15	22	1.26742
1386	9	6	15	20	1.00794
1387	9	6	15	18	1.06754
1388	9	6	15	16	1.28696
1389	9	6	15	14	1.59879
1390	9	6	15	12	1.32245
1391	9	6	15	10	1.40338
1392	9	6	15	8	0.926257
1393	9	6	15	6	1.32119
1394	9	6	15	4	1.24722
1395	9	6	15	2	1.00891
1396	9	6	15	1.27222e-13	1.89387
1397	9	6	15	2	1.51192
1398	9	6	15	4	1.54561
1399	9	6	15	6	1.2891
1400	9	6	15	8	1.55941
1401	9	6	15	10	1.41068
1402	9	6	15	12	1.70767
1403	9	6	15	14	1.06215
1404	9	6	15	16	1.19829
1405	9	6	15	18	1.12343
1406	9	6	15	20	1.36169
1407	9	6	15	22	1.18198
1408	9	6	15	24	1.20407
1409	9	6	15	26	0.926764
1410	9	6	15	28	1.2227
1411	9	6	15	30	1.21611
1412	9	6	15	32	1.26705
1413	9	6	15	34	1.21131
1414	9	6	15	36	1.3447
1415	9	6	15	38	1.19442
1416	9	6	15	40	1.11576
1417	9	6	15	42	1.04643
1418	9	6	15	44	1.25107
1419	9	6	15	46	0.992402
1420	9	6	15	48	1.33932
1421	9	6	15	50	1.16225
1422	9	6	15	52	1.41193
1423	9	6	15	54	1.44748
1424	9	6	15	56	1.21315
1425	9	6	15	58	1.51078
1426	9	6	15	60	1.83433
1427	9	6	15	62	1.53012
1428	9	6	15	64	1.34988
1429	9	6	15	66	1.38029
1430	9	6	15	68	1.04403
1431	9	6	15	70	1.02698
1432	9	6	15	72	0.815422
1433	9	6	15	74	0.968217
1434	9	6	15	76	0.96293
1435	9	6	15	78	0.806524
1436	9	6	15	80	0.579861
1437	9	6	15	82	0.589064
1438	9	6	15	84	0.663535
1439	9	6	15	86	0.511713
1440	9	6	15	88	0.478685
1441	9	6	16	90	0.61595
1442	9	6	16	88	0.769588
1443	9	6	16	86	0.791429
1444	9	6	16	84	0.593234
1445	9	6	16	82	0.646724
1446	9	6	16	80	0.865699
1447	9	6	16	78	0.836062
1448	9	6	16	76	1.10648
1449	9	6	16	74	1.26672
1450	9	6	16	72	1.11565
1451	9	6	16	70	1.1411
1452	9	6	16	68	1.11356
1453	9	6	16	66	1.1362
1454	9	6	16	64	1.00152
1455	9	6	16	62	0.98271
1456	9	6	16	60	1.28721
1457	9	6	16	58	1.09034
1458	9	6	16	56	1.27695
1459	9	6	16	54	1.20822
1460	9	6	16	52	1.06482
1461	9	6	16	50	1.07708
1462	9	6	16	48	1.17839
1463	9	6	16	46	1.33418
1464	9	6	16	44	1.02231
1465	9	6	16	42	1.01328
1466	9	6	16	40	1.00349
1467	9	6	16	38	1.01213
1468	9	6	16	36	0.82056
1469	9	6	16	34	0.871619
1470	9	6	16	32	0.789274
1471	9	6	16	30	0.809068
1472	9	6	16	28	0.903678
1473	9	6	16	26	0.999854
1474	9	6	16	24	0.828418
1475	9	6	16	22	0.984564
1476	9	6	16	20	0.844397
1477	9	6	16	18	0.80367
1478	9	6	16	16	0.854244
1479	9	6	16	14	1.0549
1480	9	6	16	12	0.92924
1481	9	6	16	10	0.96852
1482	9	6	16	8	0.885192
1483	9	6	16	6	0.880266
1484	9	6	16	4	0.902619
1485	9	6	16	2	0.822816
1486	9	6	16	1.27222e-13	0.978394
1487	9	6	16	2	0.75725
1488	9	6	16	4	1.195
1489	9	6	16	6	1.02182
1490	9	6	16	8	1.5149
1491	9	6	16	10	1.26188
1492	9	6	16	12	1.38538
1493	9	6	16	14	1.32198
1494	9	6	16	16	1.3504
1495	9	6	16	18	1.12133
1496	9	6	16	20	1.28491
1497	9	6	16	22	1.20546
1498	9	6	16	24	1.25727
1499	9	6	16	26	1.17982
1500	9	6	16	28	1.3621
1501	9	6	16	30	1.38362
1502	9	6	16	32	1.81471
1503	9	6	16	34	1.31412
1504	9	6	16	36	1.5302
1505	9	6	16	38	1.53638
1506	9	6	16	40	1.78883
1507	9	6	16	42	1.69007
1508	9	6	16	44	1.912
1509	9	6	16	46	1.70952
1510	9	6	16	48	1.65211
1511	9	6	16	50	1.31758
1512	9	6	16	52	1.27948
1513	9	6	16	54	1.26274
1514	9	6	16	56	1.36624
1515	9	6	16	58	1.30484
1516	9	6	16	60	1.21239
1517	9	6	16	62	1.48226
1518	9	6	16	64	1.65598
1519	9	6	16	66	1.51114
1520	9	6	16	68	1.35189
1521	9	6	16	70	0.980886
1522	9	6	16	72	0.794385
1523	9	6	16	74	0.823095
1524	9	6	16	76	0.985402
1525	9	6	16	78	0.755183
1526	9	6	16	80	0.898035
1527	9	6	16	82	0.690893
1528	9	6	16	84	0.89361
1529	9	6	16	86	0.691657
1530	9	6	16	88	0.708956
1531	9	6	17	90	0.724068
1532	9	6	17	88	0.576491
1533	9	6	17	86	0.893632
1534	9	6	17	84	0.825147
1535	9	6	17	82	0.914934
1536	9	6	17	80	0.808115
1537	9	6	17	78	0.950509
1538	9	6	17	76	1.0288
1539	9	6	17	74	1.16561
1540	9	6	17	72	1.13779
1541	9	6	17	70	1.28281
1542	9	6	17	68	1.22978
1543	9	6	17	66	1.40142
1544	9	6	17	64	1.27055
1545	9	6	17	62	1.31462
1546	9	6	17	60	1.15142
1547	9	6	17	58	1.58231
1548	9	6	17	56	1.46389
1549	9	6	17	54	1.5754
1550	9	6	17	52	1.02327
1551	9	6	17	50	1.28548
1552	9	6	17	48	1.04976
1553	9	6	17	46	1.29342
1554	9	6	17	44	0.976957
1555	9	6	17	42	1.05504
1556	9	6	17	40	1.09912
1557	9	6	17	38	1.2659
1558	9	6	17	36	1.21574
1559	9	6	17	34	1.20539
1560	9	6	17	32	0.971581
1561	9	6	17	30	0.8104
1562	9	6	17	28	0.725891
1563	9	6	17	26	0.921784
1564	9	6	17	24	0.773381
1565	9	6	17	22	0.82652
1566	9	6	17	20	0.821021
1567	9	6	17	18	0.930534
1568	9	6	17	16	1.13994
1569	9	6	17	14	1.33431
1570	9	6	17	12	1.09627
1571	9	6	17	10	1.49918
1572	9	6	17	8	0.903843
1573	9	6	17	6	1.0319
1574	9	6	17	4	1.07462
1575	9	6	17	2	1.21208
1576	9	6	17	1.27222e-13	1.37177
1577	9	6	17	2	0.794187
1578	9	6	17	4	0.817469
1579	9	6	17	6	0.743425
1580	9	6	17	8	1.0022
1581	9	6	17	10	0.846472
1582	9	6	17	12	0.961931
1583	9	6	17	14	0.9022
1584	9	6	17	16	1.07179
1585	9	6	17	18	1.00179
1586	9	6	17	20	0.938362
1587	9	6	17	22	1.06544
1588	9	6	17	24	1.44464
1589	9	6	17	26	1.4385
1590	9	6	17	28	1.38105
1591	9	6	17	30	1.27051
1592	9	6	17	32	1.39968
1593	9	6	17	34	1.48619
1594	9	6	17	36	1.43637
1595	9	6	17	38	1.40781
1596	9	6	17	40	1.38245
1597	9	6	17	42	1.61468
1598	9	6	17	44	1.72895
1599	9	6	17	46	1.4728
1600	9	6	17	48	1.29495
1601	9	6	17	50	1.16362
1602	9	6	17	52	1.43099
1603	9	6	17	54	1.36284
1604	9	6	17	56	1.43124
1605	9	6	17	58	1.4352
1606	9	6	17	60	1.3606
1607	9	6	17	62	1.34831
1608	9	6	17	64	1.46421
1609	9	6	17	66	1.01138
1610	9	6	17	68	1.0001
1611	9	6	17	70	1.0087
1612	9	6	17	72	0.933167
1613	9	6	17	74	0.631031
1614	9	6	17	76	0.905136
1615	9	6	17	78	0.743395
1616	9	6	17	80	0.89462
1617	9	6	17	82	0.672881
1618	9	6	17	84	0.840266
1619	9	6	17	86	0.632412
1620	9	6	17	88	0.613686
1621	9	6	18	90	0.662077
1622	9	6	18	88	0.581716
1623	9	6	18	86	0.560649
1624	9	6	18	84	0.571916
1625	9	6	18	82	0.558913
1626	9	6	18	80	0.607452
1627	9	6	18	78	0.817907
1628	9	6	18	76	0.879531
1629	9	6	18	74	0.897958
1630	9	6	18	72	0.940051
1631	9	6	18	70	1.00812
1632	9	6	18	68	0.859431
1633	9	6	18	66	0.829855
1634	9	6	18	64	0.787955
1635	9	6	18	62	0.748459
1636	9	6	18	60	0.872413
1637	9	6	18	58	0.809546
1638	9	6	18	56	0.963438
1639	9	6	18	54	0.872353
1640	9	6	18	52	0.885132
1641	9	6	18	50	0.970496
1642	9	6	18	48	1.07215
1643	9	6	18	46	1.48049
1644	9	6	18	44	1.1082
1645	9	6	18	42	0.961342
1646	9	6	18	40	0.725017
1647	9	6	18	38	0.916357
1648	9	6	18	36	0.901299
1649	9	6	18	34	0.839648
1650	9	6	18	32	0.839221
1651	9	6	18	30	0.773529
1652	9	6	18	28	0.741982
1653	9	6	18	26	1.10266
1654	9	6	18	24	0.846308
1655	9	6	18	22	1.00645
1656	9	6	18	20	0.977129
1657	9	6	18	18	1.03078
1658	9	6	18	16	1.12417
1659	9	6	18	14	1.66567
1660	9	6	18	12	1.18182
1661	9	6	18	10	1.11382
1662	9	6	18	8	0.979043
1663	9	6	18	6	1.18927
1664	9	6	18	4	0.995507
1665	9	6	18	2	1.21101
1666	9	6	18	1.27222e-13	1.59455
1667	9	6	18	2	1.23677
1668	9	6	18	4	1.0511
1669	9	6	18	6	0.834998
1670	9	6	18	8	1.13675
1671	9	6	18	10	1.11617
1672	9	6	18	12	1.44219
1673	9	6	18	14	1.04489
1674	9	6	18	16	1.26568
1675	9	6	18	18	1.13607
1676	9	6	18	20	1.32487
1677	9	6	18	22	1.39903
1678	9	6	18	24	1.42975
1679	9	6	18	26	1.35656
1680	9	6	18	28	1.39633
1681	9	6	18	30	1.46189
1682	9	6	18	32	1.6009
1683	9	6	18	34	1.4627
1684	9	6	18	36	1.5857
1685	9	6	18	38	1.4064
1686	9	6	18	40	1.55144
1687	9	6	18	42	1.51108
1688	9	6	18	44	1.92851
1689	9	6	18	46	1.53731
1690	9	6	18	48	1.70911
1691	9	6	18	50	1.40984
1692	9	6	18	52	1.64162
1693	9	6	18	54	1.59432
1694	9	6	18	56	1.71229
1695	9	6	18	58	1.79556
1696	9	6	18	60	1.67355
1697	9	6	18	62	1.85861
1698	9	6	18	64	1.63551
1699	9	6	18	66	1.34301
1700	9	6	18	68	1.1338
1701	9	6	18	70	1.17464
1702	9	6	18	72	1.23153
1703	9	6	18	74	0.897766
1704	9	6	18	76	0.824749
1705	9	6	18	78	0.787449
1706	9	6	18	80	0.732023
1707	9	6	18	82	0.69813
1708	9	6	18	84	0.623329
1709	9	6	18	86	0.624566
1710	9	6	18	88	0.618748
1711	9	6	19	90	0.662057
1712	9	6	19	88	0.501922
1713	9	6	19	86	0.441405
1714	9	6	19	84	0.549799
1715	9	6	19	82	0.504959
1716	9	6	19	80	0.534802
1717	9	6	19	78	0.714329
1718	9	6	19	76	0.613355
1719	9	6	19	74	0.787939
1720	9	6	19	72	0.851083
1721	9	6	19	70	0.93643
1722	9	6	19	68	0.788258
1723	9	6	19	66	0.858865
1724	9	6	19	64	0.823809
1725	9	6	19	62	0.798745
1726	9	6	19	60	0.837745
1727	9	6	19	58	0.805611
1728	9	6	19	56	0.85007
1729	9	6	19	54	0.685924
1730	9	6	19	52	0.697601
1731	9	6	19	50	0.805581
1732	9	6	19	48	0.708873
1733	9	6	19	46	1.10792
1734	9	6	19	44	0.859004
1735	9	6	19	42	0.908558
1736	9	6	19	40	0.903527
1737	9	6	19	38	0.892041
1738	9	6	19	36	1.00215
1739	9	6	19	34	0.86714
1740	9	6	19	32	0.917979
1741	9	6	19	30	0.997072
1742	9	6	19	28	0.821212
1743	9	6	19	26	0.880165
1744	9	6	19	24	0.880745
1745	9	6	19	22	0.770878
1746	9	6	19	20	0.943167
1747	9	6	19	18	1.20974
1748	9	6	19	16	1.07519
1749	9	6	19	14	1.61455
1750	9	6	19	12	1.4344
1751	9	6	19	10	1.52313
1752	9	6	19	8	1.04361
1753	9	6	19	6	1.10651
1754	9	6	19	4	1.21412
1755	9	6	19	2	1.69565
1756	9	6	19	1.27222e-13	2.03794
1757	9	6	19	2	1.35676
1758	9	6	19	4	1.22624
1759	9	6	19	6	1.13992
1760	9	6	19	8	1.58763
1761	9	6	19	10	1.39271
1762	9	6	19	12	1.47571
1763	9	6	19	14	1.38869
1764	9	6	19	16	1.32541
1765	9	6	19	18	1.28252
1766	9	6	19	20	1.27788
1767	9	6	19	22	1.30163
1768	9	6	19	24	1.51569
1769	9	6	19	26	1.42254
1770	9	6	19	28	1.29295
1771	9	6	19	30	1.38703
1772	9	6	19	32	1.49287
1773	9	6	19	34	1.56274
1774	9	6	19	36	1.55092
1775	9	6	19	38	1.36063
1776	9	6	19	40	1.78229
1777	9	6	19	42	1.5466
1778	9	6	19	44	1.99135
1779	9	6	19	46	1.7408
1780	9	6	19	48	1.7781
1781	9	6	19	50	1.40418
1782	9	6	19	52	1.69086
1783	9	6	19	54	1.97717
1784	9	6	19	56	2.19521
1785	9	6	19	58	1.47207
1786	9	6	19	60	1.35465
1787	9	6	19	62	1.39082
1788	9	6	19	64	1.46654
1789	9	6	19	66	1.22625
1790	9	6	19	68	0.931982
1791	9	6	19	70	1.11767
1792	9	6	19	72	0.882569
1793	9	6	19	74	0.853731
1794	9	6	19	76	0.757694
1795	9	6	19	78	0.750668
1796	9	6	19	80	0.615989
1797	9	6	19	82	0.562061
1798	9	6	19	84	0.593091
1799	9	6	19	86	0.54146
1800	9	6	19	88	0.570173
1801	9	6	20	90	1.10368
1802	9	6	20	88	0.651839
1803	9	6	20	86	0.702985
1804	9	6	20	84	0.592403
1805	9	6	20	82	0.692562
1806	9	6	20	80	0.728199
1807	9	6	20	78	0.864414
1808	9	6	20	76	0.962805
1809	9	6	20	74	1.06165
1810	9	6	20	72	1.06313
1811	9	6	20	70	1.16154
1812	9	6	20	68	1.01911
1813	9	6	20	66	0.97432
1814	9	6	20	64	1.01318
1815	9	6	20	62	0.899193
1816	9	6	20	60	0.910993
1817	9	6	20	58	0.952176
1818	9	6	20	56	0.955553
1819	9	6	20	54	0.749184
1820	9	6	20	52	0.640562
1821	9	6	20	50	1.03339
1822	9	6	20	48	0.824899
1823	9	6	20	46	1.23736
1824	9	6	20	44	0.796873
1825	9	6	20	42	0.930785
1826	9	6	20	40	0.734785
1827	9	6	20	38	0.806342
1828	9	6	20	36	0.868651
1829	9	6	20	34	0.876835
1830	9	6	20	32	0.847725
1831	9	6	20	30	0.872052
1832	9	6	20	28	0.998345
1833	9	6	20	26	1.01002
1834	9	6	20	24	0.90851
1835	9	6	20	22	1.01147
1836	9	6	20	20	0.998709
1837	9	6	20	18	0.906937
1838	9	6	20	16	0.947135
1839	9	6	20	14	1.18519
1840	9	6	20	12	1.0133
1841	9	6	20	10	1.37138
1842	9	6	20	8	1.00185
1843	9	6	20	6	1.18121
1844	9	6	20	4	1.23847
1845	9	6	20	2	1.12784
1846	9	6	20	1.27222e-13	1.65516
1847	9	6	20	2	1.3554
1848	9	6	20	4	1.05352
1849	9	6	20	6	1.06561
1850	9	6	20	8	1.38348
1851	9	6	20	10	1.10465
1852	9	6	20	12	1.81071
1853	9	6	20	14	1.28064
1854	9	6	20	16	1.26594
1855	9	6	20	18	1.35018
1856	9	6	20	20	1.03863
1857	9	6	20	22	1.31339
1858	9	6	20	24	1.63543
1859	9	6	20	26	1.55387
1860	9	6	20	28	1.57268
1861	9	6	20	30	1.72629
1862	9	6	20	32	1.8406
1863	9	6	20	34	2.21487
1864	9	6	20	36	1.8109
1865	9	6	20	38	1.61562
1866	9	6	20	40	1.6261
1867	9	6	20	42	1.63264
1868	9	6	20	44	2.34256
1869	9	6	20	46	1.39048
1870	9	6	20	48	1.3761
1871	9	6	20	50	1.30026
1872	9	6	20	52	1.4669
1873	9	6	20	54	1.40982
1874	9	6	20	56	1.33023
1875	9	6	20	58	1.29094
1876	9	6	20	60	1.07035
1877	9	6	20	62	1.00543
1878	9	6	20	64	1.06711
1879	9	6	20	66	1.21689
1880	9	6	20	68	0.860562
1881	9	6	20	70	0.852771
1882	9	6	20	72	0.889629
1883	9	6	20	74	1.03013
1884	9	6	20	76	0.66272
1885	9	6	20	78	0.754017
1886	9	6	20	80	0.665977
1887	9	6	20	82	0.688816
1888	9	6	20	84	0.58191
1889	9	6	20	86	0.62223
1890	9	6	20	88	0.788309
1891	9	6	21	90	0.727751
1892	9	6	21	88	0.623128
1893	9	6	21	86	0.504454
1894	9	6	21	84	0.473653
1895	9	6	21	82	0.655412
1896	9	6	21	80	0.575766
1897	9	6	21	78	0.723575
1898	9	6	21	76	0.693991
1899	9	6	21	74	0.918605
1900	9	6	21	72	0.909604
1901	9	6	21	70	0.957907
1902	9	6	21	68	0.975733
1903	9	6	21	66	0.925966
1904	9	6	21	64	0.705657
1905	9	6	21	62	0.709647
1906	9	6	21	60	0.829673
1907	9	6	21	58	0.737777
1908	9	6	21	56	1.06054
1909	9	6	21	54	0.973307
1910	9	6	21	52	0.837654
1911	9	6	21	50	0.772543
1912	9	6	21	48	0.980166
1913	9	6	21	46	1.51963
1914	9	6	21	44	1.03953
1915	9	6	21	42	0.797236
1916	9	6	21	40	0.843361
1917	9	6	21	38	0.939624
1918	9	6	21	36	0.96974
1919	9	6	21	34	0.811695
1920	9	6	21	32	0.788646
1921	9	6	21	30	0.755065
1922	9	6	21	28	0.813497
1923	9	6	21	26	0.768667
1924	9	6	21	24	0.778809
1925	9	6	21	22	0.884355
1926	9	6	21	20	0.85155
1927	9	6	21	18	0.816781
1928	9	6	21	16	0.867972
1929	9	6	21	14	1.58656
1930	9	6	21	12	1.14543
1931	9	6	21	10	1.05616
1932	9	6	21	8	0.944767
1933	9	6	21	6	1.12174
1934	9	6	21	4	1.00656
1935	9	6	21	2	1.2057
1936	9	6	21	1.27222e-13	1.68936
1937	9	6	21	2	1.20169
1938	9	6	21	4	1.20568
1939	9	6	21	6	1.16335
1940	9	6	21	8	1.3194
1941	9	6	21	10	1.24272
1942	9	6	21	12	1.62583
1943	9	6	21	14	1.35278
1944	9	6	21	16	1.56424
1945	9	6	21	18	1.60769
1946	9	6	21	20	1.35214
1947	9	6	21	22	1.5494
1948	9	6	21	24	1.63476
1949	9	6	21	26	1.46917
1950	9	6	21	28	1.66669
1951	9	6	21	30	1.58024
1952	9	6	21	32	1.71601
1953	9	6	21	34	1.78873
1954	9	6	21	36	1.88061
1955	9	6	21	38	1.71133
1956	9	6	21	40	1.49186
1957	9	6	21	42	1.57449
1958	9	6	21	44	2.72169
1959	9	6	21	46	1.64156
1960	9	6	21	48	1.56967
1961	9	6	21	50	1.52315
1962	9	6	21	52	1.88676
1963	9	6	21	54	1.84622
1964	9	6	21	56	1.71068
1965	9	6	21	58	1.60359
1966	9	6	21	60	1.2693
1967	9	6	21	62	1.272
1968	9	6	21	64	1.37031
1969	9	6	21	66	1.15689
1970	9	6	21	68	0.917163
1971	9	6	21	70	0.854871
1972	9	6	21	72	0.880785
1973	9	6	21	74	0.813235
1974	9	6	21	76	0.653228
1975	9	6	21	78	0.535494
1976	9	6	21	80	0.591608
1977	9	6	21	82	0.536945
1978	9	6	21	84	0.517313
1979	9	6	21	86	0.51634
1980	9	6	21	88	0.637422
1981	9	9	11	90	0.412874
1982	9	9	11	88	0.147983
1983	9	9	11	86	0.192834
1984	9	9	11	84	0.373509
1985	9	9	11	82	0.528071
1986	9	9	11	80	0.868129
1987	9	9	11	78	0.741685
1988	9	9	11	76	0.675079
1989	9	9	11	74	0.695978
1990	9	9	11	72	0.41397
1991	9	9	11	70	0.574587
1992	9	9	11	68	0.319698
1993	9	9	11	66	0.530767
1994	9	9	11	64	0.662304
1995	9	9	11	62	0.549282
1996	9	9	11	60	0.583339
1997	9	9	11	58	0.444555
1998	9	9	11	56	0.741991
1999	9	9	11	54	0.351093
[truncated: 971 more rows]

## Sheet: Figure 2D
image	experiment	plant	das	AreaManual	PrPathLength	PrVectorLength	PrStraightness	PrGrowthRate	LrNumber	BranchedZone	ApicalZone	LRDensityPrPath	LrDensityBz	area	convexhull	depth	width	circularity	ar	round	solidity	feret	feret_angle	massX	massY
9_R10_D11.tif	9	10	11	2.75	5.58	5.43	0.97	0	3	2.36	3.22	0.54	1.27	98.264	2.2076	5.46898	0.649351	0.208493	8.21833	0.121679	0.965266	5.47659	86.9793	0	3.0895
9_R10_D12.tif	9	10	12	4.02	6.8	6.75	0.99	1.42	5	3.09	3.71	0.74	1.62	170.775	3.20146	6.34921	0.865801	0.223529	6.92311	0.144444	0.971196	6.37807	84.5474	0	3.6119
9_R10_D13.tif	9	10	13	10.29	9	7.79	0.87	1.22	8	5.38	3.62	0.89	1.49	165.739	9.26332	8.83117	1.90476	0.314451	4.48794	0.222819	0.98452	8.85501	85.7946	0	4.03317
9_R10_D14.tif	9	10	14	16.64	10.09	9.11	0.9	1.31	12	6.2	3.9	1.19	1.94	118.428	15.0341	9.7114	2.81385	0.399221	3.3097	0.302142	0.988994	9.75121	84.8209	0	4.41696
9_R10_D15.tif	9	10	15	26.28	11.46	10.18	0.89	1.2	17	8.18	3.28	1.48	2.08	160.986	23.7418	10.7071	4.11255	0.484264	2.56557	0.389777	0.991737	10.7676	83.9227	0	4.8425
9_R10_D16.tif	9	10	16	35.35	12.16	11.2	0.92	1.18	21	9.08	3.08	1.73	2.31	91.9413	35.0612	11.6306	5.49784	0.569104	2.07667	0.481541	0.993413	11.6808	84.6838	0	5.14873
9_R10_D17.tif	9	10	17	52.56	13.68	12.09	0.88	0.98	24	10.9	2.78	1.75	2.2	84.3813	51.8219	13.2179	7.4026	0.61395	1.78968	0.55876	0.994853	13.283	84.3266	0	5.88762
9_R10_D18.tif	9	10	18	75.39	15.31	13.74	0.9	1.53	27	11.93	3.37	1.76	2.26	29.6315	73.8434	14.9639	9.61039	0.635838	1.59607	0.62654	0.995323	14.998	86.1382	0	6.64884
9_R10_D19.tif	9	10	19	101.34	17.06	15.33	0.9	1.72	30	12.69	4.38	1.76	2.36	21.9698	103.024	16.6522	11.9913	0.672358	1.41126	0.708588	0.996419	16.7039	85.4912	0	7.47801
9_R10_D20.tif	9	10	20	119.78	18.89	17.21	0.91	1.78	32	13.84	5.05	1.69	2.31	15.0915	125.613	18.2684	12.3232	0.698674	1.4357	0.696524	0.996629	18.2996	86.6548	0	8.15211
9_R10_D21.tif	9	10	21	144.84	20.57	18.96	0.92	1.87	35	15.81	4.76	1.7	2.21	19.1813	143.218	19.1631	12.4675	0.738036	1.41306	0.707685	0.996995	19.21	85.9941	0	8.8079
9_R6_D11.tif	9	6	11	3.378	6.66	6.56	0.99	0	6	3.11	3.55	0.9	1.93	143.878	3.51193	6.34921	1.12554	0.237525	6.15854	0.162376	0.971628	6.35198	91.6923	0	2.81672
9_R6_D12.tif	9	6	12	4.979	7.38	7.44	1.01	0.73	10	4.02	3.36	1.35	2.49	157.244	5.40615	7.17172	1.38528	0.283098	5.2703	0.189742	0.980254	7.17696	92.1893	0	2.92138
9_R6_D13.tif	9	6	13	10.875	8.96	8.47	0.95	1.57	12	5.22	3.73	1.34	2.3	107.12	10.8748	8.54257	2.20779	0.378603	3.81252	0.262294	0.987408	8.54569	88.4518	0	3.47083
9_R6_D14.tif	9	6	14	15.578	10.15	9.67	0.95	1.19	17	6.58	3.56	1.68	2.58	76.8126	15.4963	9.65368	2.98701	0.410438	3.20569	0.311946	0.989069	9.67092	86.5783	0	3.97132
9_R6_D15.tif	9	6	15	21.968	11.74	11.25	0.96	1.6	20	7.7	4.05	1.7	2.6	163.069	22.4823	10.7937	3.67965	0.465504	2.85504	0.350258	0.991123	10.8261	85.5662	0	4.57712
9_R6_D16.tif	9	6	16	32.905	13.17	12.38	0.94	1.43	24	9.07	4.1	1.82	2.65	134.437	32.2274	12.3088	4.71861	0.497662	2.52047	0.396752	0.992911	12.3344	86.3108	0	5.1828
9_R6_D17.tif	9	6	17	46.765	14.93	14.41	0.97	1.76	29	10.56	4.37	1.94	2.75	12.9227	47.2249	13.6652	6.58009	0.550243	2.07728	0.481399	0.994015	13.6858	86.857	0	5.80578
9_R6_D18.tif	9	6	18	68.406	16.63	16.14	0.97	1.7	34	12.27	4.36	2.04	2.77	13.8114	67.8442	15.3968	8.22511	0.592104	1.86004	0.537622	0.995256	15.4491	85.2853	0	6.66153
9_R6_D19.tif	9	6	19	85.379	18.86	18.43	0.98	2.24	37	13.58	5.28	1.96	2.72	27.8008	83.9433	16.0029	9.65368	0.648998	1.6101	0.62108	0.995911	16.08	84.3866	0	7.13032
9_R6_D20.tif	9	6	20	99.224	21.21	20.61	0.97	2.34	40	14.77	6.44	1.89	2.71	23.7989	92.6488	16.4791	9.69697	0.675782	1.59785	0.625839	0.996208	16.5348	85.2945	0	7.38822
9_R6_D21.tif	9	6	21	118.255	23.2	22.78	0.98	1.99	43	16.85	6.35	1.85	2.55	28.6915	120.337	18.557	11.2554	0.678558	1.65472	0.604332	0.996638	18.6811	83.391	0	8.46023
9_R9_D11.tif	9	9	11	2.727	4.6	4.31	0.94	0	3	1.61	2.99	0.65	1.87	119.578	3.22208	5.29582	0.995671	0.310658	5.44366	0.1837	0.974004	5.31348	94.6732	0	2.4989
9_R9_D12.tif	9	9	12	5.209	5.93	5.3	0.89	1.16	6	2.38	3.54	1.01	2.52	146.493	5.42718	6.19048	1.68831	0.359179	3.7309	0.268032	0.980679	6.20876	94.3987	0	2.61238
9_R9_D13.tif	9	9	13	9.37	7	6.81	0.97	1.14	8	3.64	3.36	1.14	2.2	176.582	8.92829	7.8355	2.20779	0.366355	3.60396	0.277473	0.984513	7.87855	95.9925	0	3.35861
9_R9_D14.tif	9	9	14	15.047	8.6	8.04	0.94	1.41	11	4.96	3.64	1.28	2.22	78.2554	14.541	8.8456	3.20346	0.441456	2.82187	0.354375	0.988646	8.93424	98.0777	0	3.83869
9_R9_D15.tif	9	9	15	25.387	9.97	9.53	0.96	1.5	13	6.53	3.44	1.3	1.99	105.828	23.8532	10.1587	4.54545	0.506804	2.27426	0.439703	0.991917	10.2711	98.483	0	4.3962
9_R9_D16.tif	9	9	16	36.615	11.69	11.19	0.96	1.53	16	7.81	3.87	1.37	2.05	125.923	38.9204	12.0202	6.06061	0.552443	1.96272	0.509497	0.99393	12.1382	97.9952	0	5.16944
9_R9_D17.tif	9	9	17	54.129	12.88	12.36	0.96	1.29	20	9.1	3.78	1.55	2.2	14.418	52.646	12.6696	7.74892	0.604361	1.62147	0.616725	0.994652	12.7564	96.6909	0	5.38108
9_R9_D18.tif	9	9	18	70.991	15.01	14.28	0.95	1.94	23	10.59	4.43	1.53	2.17	21.9067	70.058	14.6176	8.7013	0.614624	1.63324	0.612281	0.9955	14.6974	95.9737	0	6.26473
9_R9_D19.tif	9	9	19	89.612	17.11	16.22	0.95	2.23	27	12.12	4.99	1.58	2.23	29.8133	86.6863	16.5224	9.52381	0.612851	1.69795	0.588947	0.995815	16.5647	94.0963	0	7.1367
9_R9_D20.tif	9	9	20	103.983	18.73	17.87	0.95	2.14	33	14.04	4.69	1.76	2.35	23.1084	105.522	18.2107	10.303	0.621044	1.71319	0.583707	0.996228	18.2228	92.0875	0	7.87983
9_R9_D21.tif	9	9	21	122.311	20.65	19.77	0.96	1.43	38	15.62	5.03	1.84	2.43	16.282	125.23	19.6681	11.2987	0.625919	1.73715	0.575654	0.996704	19.6847	92.3527	0	8.44733
