# Supplementary material for: GLO-Roots: an imaging platform enabling multidimensional characterization of soil-grown root systems
Source: eLife. 2015 Aug 19;4:e07597. doi: 10.7554/eLife.07597 (PMC4589753; doi:10.7554/eLife.07597)
Supplement: Figure 3—source data 1. — DOI: http://dx.doi.org/10.7554/eLife.07597.021 [file elife07597s008.xlsx]

## Sheet: Figure 3D
	experiment	das	accession	plant	aq	x	y	angle	count
1	50	22	bay	1	1.tif	0	0	90	0.594554
2	50	22	bay	1	1.tif	0	0	88	0.523058
3	50	22	bay	1	1.tif	0	0	86	0.494186
4	50	22	bay	1	1.tif	0	0	84	0.465642
5	50	22	bay	1	1.tif	0	0	82	0.467227
6	50	22	bay	1	1.tif	0	0	80	0.505974
7	50	22	bay	1	1.tif	0	0	78	0.546174
8	50	22	bay	1	1.tif	0	0	76	0.594637
9	50	22	bay	1	1.tif	0	0	74	0.655544
10	50	22	bay	1	1.tif	0	0	72	0.718037
11	50	22	bay	1	1.tif	0	0	70	0.803834
12	50	22	bay	1	1.tif	0	0	68	0.787771
13	50	22	bay	1	1.tif	0	0	66	0.754348
14	50	22	bay	1	1.tif	0	0	64	0.942145
15	50	22	bay	1	1.tif	0	0	62	1.15703
16	50	22	bay	1	1.tif	0	0	60	1.22537
17	50	22	bay	1	1.tif	0	0	58	1.44051
18	50	22	bay	1	1.tif	0	0	56	1.44254
19	50	22	bay	1	1.tif	0	0	54	1.2221
20	50	22	bay	1	1.tif	0	0	52	1.05524
21	50	22	bay	1	1.tif	0	0	50	1.12585
22	50	22	bay	1	1.tif	0	0	48	1.34809
23	50	22	bay	1	1.tif	0	0	46	1.42828
24	50	22	bay	1	1.tif	0	0	44	1.52127
25	50	22	bay	1	1.tif	0	0	42	1.58002
26	50	22	bay	1	1.tif	0	0	40	1.56223
27	50	22	bay	1	1.tif	0	0	38	1.29082
28	50	22	bay	1	1.tif	0	0	36	1.19265
29	50	22	bay	1	1.tif	0	0	34	0.929928
30	50	22	bay	1	1.tif	0	0	32	1.06338
31	50	22	bay	1	1.tif	0	0	30	1.32357
32	50	22	bay	1	1.tif	0	0	28	1.15208
33	50	22	bay	1	1.tif	0	0	26	1.00185
34	50	22	bay	1	1.tif	0	0	24	1.02664
35	50	22	bay	1	1.tif	0	0	22	1.25021
36	50	22	bay	1	1.tif	0	0	20	1.00941
37	50	22	bay	1	1.tif	0	0	18	0.928191
38	50	22	bay	1	1.tif	0	0	16	0.937194
39	50	22	bay	1	1.tif	0	0	14	0.945964
40	50	22	bay	1	1.tif	0	0	12	1.06589
41	50	22	bay	1	1.tif	0	0	10	1.13425
42	50	22	bay	1	1.tif	0	0	8	1.10418
43	50	22	bay	1	1.tif	0	0	6	1.21803
44	50	22	bay	1	1.tif	0	0	4	1.13137
45	50	22	bay	1	1.tif	0	0	2	1.05923
46	50	22	bay	1	1.tif	0	0	1.27222e-13	1.1519
47	50	22	bay	1	1.tif	0	0	2	1.08432
48	50	22	bay	1	1.tif	0	0	4	1.09516
49	50	22	bay	1	1.tif	0	0	6	1.38174
50	50	22	bay	1	1.tif	0	0	8	1.5849
51	50	22	bay	1	1.tif	0	0	10	1.27176
52	50	22	bay	1	1.tif	0	0	12	1.40477
53	50	22	bay	1	1.tif	0	0	14	1.54519
54	50	22	bay	1	1.tif	0	0	16	1.69202
55	50	22	bay	1	1.tif	0	0	18	1.80512
56	50	22	bay	1	1.tif	0	0	20	1.80544
57	50	22	bay	1	1.tif	0	0	22	1.74787
58	50	22	bay	1	1.tif	0	0	24	1.69104
59	50	22	bay	1	1.tif	0	0	26	1.67868
60	50	22	bay	1	1.tif	0	0	28	1.5051
61	50	22	bay	1	1.tif	0	0	30	1.69654
62	50	22	bay	1	1.tif	0	0	32	1.67349
63	50	22	bay	1	1.tif	0	0	34	1.47577
64	50	22	bay	1	1.tif	0	0	36	1.54093
65	50	22	bay	1	1.tif	0	0	38	1.36158
66	50	22	bay	1	1.tif	0	0	40	1.61029
67	50	22	bay	1	1.tif	0	0	42	1.43396
68	50	22	bay	1	1.tif	0	0	44	1.39013
69	50	22	bay	1	1.tif	0	0	46	1.4465
70	50	22	bay	1	1.tif	0	0	48	1.48091
71	50	22	bay	1	1.tif	0	0	50	1.19851
72	50	22	bay	1	1.tif	0	0	52	1.10974
73	50	22	bay	1	1.tif	0	0	54	1.09639
74	50	22	bay	1	1.tif	0	0	56	1.08135
75	50	22	bay	1	1.tif	0	0	58	0.998087
76	50	22	bay	1	1.tif	0	0	60	0.989767
77	50	22	bay	1	1.tif	0	0	62	0.977703
78	50	22	bay	1	1.tif	0	0	64	0.936467
79	50	22	bay	1	1.tif	0	0	66	1.02995
80	50	22	bay	1	1.tif	0	0	68	0.972424
81	50	22	bay	1	1.tif	0	0	70	0.736245
82	50	22	bay	1	1.tif	0	0	72	0.668247
83	50	22	bay	1	1.tif	0	0	74	0.649177
84	50	22	bay	1	1.tif	0	0	76	0.695421
85	50	22	bay	1	1.tif	0	0	78	0.661301
86	50	22	bay	1	1.tif	0	0	80	0.585104
87	50	22	bay	1	1.tif	0	0	82	0.610295
88	50	22	bay	1	1.tif	0	0	84	0.614702
89	50	22	bay	1	1.tif	0	0	86	0.579235
90	50	22	bay	1	1.tif	0	0	88	0.528255
91	50	22	bay	2	2.tif	0	0	90	0.609556
92	50	22	bay	2	2.tif	0	0	88	0.537082
93	50	22	bay	2	2.tif	0	0	86	0.555699
94	50	22	bay	2	2.tif	0	0	84	0.613654
95	50	22	bay	2	2.tif	0	0	82	0.630591
96	50	22	bay	2	2.tif	0	0	80	0.746142
97	50	22	bay	2	2.tif	0	0	78	0.903704
98	50	22	bay	2	2.tif	0	0	76	0.815746
99	50	22	bay	2	2.tif	0	0	74	0.833839
100	50	22	bay	2	2.tif	0	0	72	0.888352
101	50	22	bay	2	2.tif	0	0	70	0.903172
102	50	22	bay	2	2.tif	0	0	68	0.872055
103	50	22	bay	2	2.tif	0	0	66	0.910575
104	50	22	bay	2	2.tif	0	0	64	1.03464
105	50	22	bay	2	2.tif	0	0	62	1.12662
106	50	22	bay	2	2.tif	0	0	60	1.08529
107	50	22	bay	2	2.tif	0	0	58	1.29713
108	50	22	bay	2	2.tif	0	0	56	1.538
109	50	22	bay	2	2.tif	0	0	54	1.36371
110	50	22	bay	2	2.tif	0	0	52	1.55643
111	50	22	bay	2	2.tif	0	0	50	1.66275
112	50	22	bay	2	2.tif	0	0	48	1.74741
113	50	22	bay	2	2.tif	0	0	46	1.6227
114	50	22	bay	2	2.tif	0	0	44	1.24233
115	50	22	bay	2	2.tif	0	0	42	0.992864
116	50	22	bay	2	2.tif	0	0	40	1.02732
117	50	22	bay	2	2.tif	0	0	38	0.991813
118	50	22	bay	2	2.tif	0	0	36	1.00787
119	50	22	bay	2	2.tif	0	0	34	1.04569
120	50	22	bay	2	2.tif	0	0	32	0.901494
121	50	22	bay	2	2.tif	0	0	30	0.815692
122	50	22	bay	2	2.tif	0	0	28	0.750425
123	50	22	bay	2	2.tif	0	0	26	0.863082
124	50	22	bay	2	2.tif	0	0	24	1.03834
125	50	22	bay	2	2.tif	0	0	22	1.23999
126	50	22	bay	2	2.tif	0	0	20	0.966203
127	50	22	bay	2	2.tif	0	0	18	1.20042
128	50	22	bay	2	2.tif	0	0	16	0.979891
129	50	22	bay	2	2.tif	0	0	14	0.877454
130	50	22	bay	2	2.tif	0	0	12	1.15912
131	50	22	bay	2	2.tif	0	0	10	1.33616
132	50	22	bay	2	2.tif	0	0	8	1.11725
133	50	22	bay	2	2.tif	0	0	6	1.7342
134	50	22	bay	2	2.tif	0	0	4	2.33252
135	50	22	bay	2	2.tif	0	0	2	1.37901
136	50	22	bay	2	2.tif	0	0	1.27222e-13	1.3408
137	50	22	bay	2	2.tif	0	0	2	0.993777
138	50	22	bay	2	2.tif	0	0	4	1.08944
139	50	22	bay	2	2.tif	0	0	6	0.990388
140	50	22	bay	2	2.tif	0	0	8	1.02853
141	50	22	bay	2	2.tif	0	0	10	1.1291
142	50	22	bay	2	2.tif	0	0	12	1.21215
143	50	22	bay	2	2.tif	0	0	14	1.16711
144	50	22	bay	2	2.tif	0	0	16	1.19998
145	50	22	bay	2	2.tif	0	0	18	1.1104
146	50	22	bay	2	2.tif	0	0	20	1.07975
147	50	22	bay	2	2.tif	0	0	22	1.31648
148	50	22	bay	2	2.tif	0	0	24	1.70066
149	50	22	bay	2	2.tif	0	0	26	1.80023
150	50	22	bay	2	2.tif	0	0	28	1.7229
151	50	22	bay	2	2.tif	0	0	30	1.69502
152	50	22	bay	2	2.tif	0	0	32	1.58098
153	50	22	bay	2	2.tif	0	0	34	1.69354
154	50	22	bay	2	2.tif	0	0	36	1.70789
155	50	22	bay	2	2.tif	0	0	38	1.54452
156	50	22	bay	2	2.tif	0	0	40	1.55189
157	50	22	bay	2	2.tif	0	0	42	1.71713
158	50	22	bay	2	2.tif	0	0	44	1.58952
159	50	22	bay	2	2.tif	0	0	46	1.49811
160	50	22	bay	2	2.tif	0	0	48	1.37223
161	50	22	bay	2	2.tif	0	0	50	1.32548
162	50	22	bay	2	2.tif	0	0	52	1.17563
163	50	22	bay	2	2.tif	0	0	54	1.26961
164	50	22	bay	2	2.tif	0	0	56	1.22805
165	50	22	bay	2	2.tif	0	0	58	1.04915
166	50	22	bay	2	2.tif	0	0	60	1.01016
167	50	22	bay	2	2.tif	0	0	62	1.0661
168	50	22	bay	2	2.tif	0	0	64	1.03343
169	50	22	bay	2	2.tif	0	0	66	0.890853
170	50	22	bay	2	2.tif	0	0	68	0.740971
171	50	22	bay	2	2.tif	0	0	70	0.66823
172	50	22	bay	2	2.tif	0	0	72	0.589988
173	50	22	bay	2	2.tif	0	0	74	0.593114
174	50	22	bay	2	2.tif	0	0	76	0.559416
175	50	22	bay	2	2.tif	0	0	78	0.568567
176	50	22	bay	2	2.tif	0	0	80	0.487206
177	50	22	bay	2	2.tif	0	0	82	0.498653
178	50	22	bay	2	2.tif	0	0	84	0.507679
179	50	22	bay	2	2.tif	0	0	86	0.537416
180	50	22	bay	2	2.tif	0	0	88	0.513803
181	50	22	bay	3	3.tif	0	0	90	0.437161
182	50	22	bay	3	3.tif	0	0	88	0.410381
183	50	22	bay	3	3.tif	0	0	86	0.384226
184	50	22	bay	3	3.tif	0	0	84	0.456979
185	50	22	bay	3	3.tif	0	0	82	0.479885
186	50	22	bay	3	3.tif	0	0	80	0.423118
187	50	22	bay	3	3.tif	0	0	78	0.455
188	50	22	bay	3	3.tif	0	0	76	0.449438
189	50	22	bay	3	3.tif	0	0	74	0.417043
190	50	22	bay	3	3.tif	0	0	72	0.472462
191	50	22	bay	3	3.tif	0	0	70	0.43101
192	50	22	bay	3	3.tif	0	0	68	0.458755
193	50	22	bay	3	3.tif	0	0	66	0.47901
194	50	22	bay	3	3.tif	0	0	64	0.519135
195	50	22	bay	3	3.tif	0	0	62	0.580282
196	50	22	bay	3	3.tif	0	0	60	0.613338
197	50	22	bay	3	3.tif	0	0	58	0.624147
198	50	22	bay	3	3.tif	0	0	56	0.737821
199	50	22	bay	3	3.tif	0	0	54	0.856062
200	50	22	bay	3	3.tif	0	0	52	1.00788
201	50	22	bay	3	3.tif	0	0	50	0.899131
202	50	22	bay	3	3.tif	0	0	48	0.867444
203	50	22	bay	3	3.tif	0	0	46	0.959991
204	50	22	bay	3	3.tif	0	0	44	0.993558
205	50	22	bay	3	3.tif	0	0	42	0.95732
206	50	22	bay	3	3.tif	0	0	40	0.863926
207	50	22	bay	3	3.tif	0	0	38	1.04382
208	50	22	bay	3	3.tif	0	0	36	1.19229
209	50	22	bay	3	3.tif	0	0	34	1.33631
210	50	22	bay	3	3.tif	0	0	32	1.14176
211	50	22	bay	3	3.tif	0	0	30	1.2319
212	50	22	bay	3	3.tif	0	0	28	1.24866
213	50	22	bay	3	3.tif	0	0	26	1.16921
214	50	22	bay	3	3.tif	0	0	24	1.02686
215	50	22	bay	3	3.tif	0	0	22	1.2934
216	50	22	bay	3	3.tif	0	0	20	1.16211
217	50	22	bay	3	3.tif	0	0	18	1.40825
218	50	22	bay	3	3.tif	0	0	16	1.20197
219	50	22	bay	3	3.tif	0	0	14	1.35768
220	50	22	bay	3	3.tif	0	0	12	1.21221
221	50	22	bay	3	3.tif	0	0	10	1.29308
222	50	22	bay	3	3.tif	0	0	8	1.43157
223	50	22	bay	3	3.tif	0	0	6	1.22446
224	50	22	bay	3	3.tif	0	0	4	1.32372
225	50	22	bay	3	3.tif	0	0	2	1.40137
226	50	22	bay	3	3.tif	0	0	1.27222e-13	1.65999
227	50	22	bay	3	3.tif	0	0	2	1.36778
228	50	22	bay	3	3.tif	0	0	4	1.73265
229	50	22	bay	3	3.tif	0	0	6	1.79496
230	50	22	bay	3	3.tif	0	0	8	1.82247
231	50	22	bay	3	3.tif	0	0	10	1.68579
232	50	22	bay	3	3.tif	0	0	12	1.54946
233	50	22	bay	3	3.tif	0	0	14	1.56191
234	50	22	bay	3	3.tif	0	0	16	1.58842
235	50	22	bay	3	3.tif	0	0	18	1.59476
236	50	22	bay	3	3.tif	0	0	20	1.48308
237	50	22	bay	3	3.tif	0	0	22	1.63863
238	50	22	bay	3	3.tif	0	0	24	2.16885
239	50	22	bay	3	3.tif	0	0	26	2.25215
240	50	22	bay	3	3.tif	0	0	28	2.01914
241	50	22	bay	3	3.tif	0	0	30	1.76187
242	50	22	bay	3	3.tif	0	0	32	1.90346
243	50	22	bay	3	3.tif	0	0	34	1.77868
244	50	22	bay	3	3.tif	0	0	36	1.91462
245	50	22	bay	3	3.tif	0	0	38	1.8596
246	50	22	bay	3	3.tif	0	0	40	1.45441
247	50	22	bay	3	3.tif	0	0	42	1.52591
248	50	22	bay	3	3.tif	0	0	44	1.56637
249	50	22	bay	3	3.tif	0	0	46	1.75843
250	50	22	bay	3	3.tif	0	0	48	1.78061
251	50	22	bay	3	3.tif	0	0	50	1.99636
252	50	22	bay	3	3.tif	0	0	52	1.82603
253	50	22	bay	3	3.tif	0	0	54	1.52006
254	50	22	bay	3	3.tif	0	0	56	1.26669
255	50	22	bay	3	3.tif	0	0	58	1.30878
256	50	22	bay	3	3.tif	0	0	60	1.13362
257	50	22	bay	3	3.tif	0	0	62	1.03772
258	50	22	bay	3	3.tif	0	0	64	0.86287
259	50	22	bay	3	3.tif	0	0	66	0.753336
260	50	22	bay	3	3.tif	0	0	68	0.76085
261	50	22	bay	3	3.tif	0	0	70	0.659811
262	50	22	bay	3	3.tif	0	0	72	0.540267
263	50	22	bay	3	3.tif	0	0	74	0.45549
264	50	22	bay	3	3.tif	0	0	76	0.417154
265	50	22	bay	3	3.tif	0	0	78	0.45038
266	50	22	bay	3	3.tif	0	0	80	0.363662
267	50	22	bay	3	3.tif	0	0	82	0.384072
268	50	22	bay	3	3.tif	0	0	84	0.372769
269	50	22	bay	3	3.tif	0	0	86	0.381462
270	50	22	bay	3	3.tif	0	0	88	0.349424
271	50	22	bay	4	1.tif	0	0	90	0.551293
272	50	22	bay	4	1.tif	0	0	88	0.428133
273	50	22	bay	4	1.tif	0	0	86	0.536695
274	50	22	bay	4	1.tif	0	0	84	0.555086
275	50	22	bay	4	1.tif	0	0	82	0.586575
276	50	22	bay	4	1.tif	0	0	80	0.605273
277	50	22	bay	4	1.tif	0	0	78	0.590581
278	50	22	bay	4	1.tif	0	0	76	0.696191
279	50	22	bay	4	1.tif	0	0	74	0.665141
280	50	22	bay	4	1.tif	0	0	72	0.71331
281	50	22	bay	4	1.tif	0	0	70	0.801205
282	50	22	bay	4	1.tif	0	0	68	0.859386
283	50	22	bay	4	1.tif	0	0	66	1.15541
284	50	22	bay	4	1.tif	0	0	64	1.07935
285	50	22	bay	4	1.tif	0	0	62	1.02099
286	50	22	bay	4	1.tif	0	0	60	1.03451
287	50	22	bay	4	1.tif	0	0	58	0.938177
288	50	22	bay	4	1.tif	0	0	56	1.12722
289	50	22	bay	4	1.tif	0	0	54	1.44584
290	50	22	bay	4	1.tif	0	0	52	2.24937
291	50	22	bay	4	1.tif	0	0	50	2.08818
292	50	22	bay	4	1.tif	0	0	48	1.54238
293	50	22	bay	4	1.tif	0	0	46	1.68697
294	50	22	bay	4	1.tif	0	0	44	1.86673
295	50	22	bay	4	1.tif	0	0	42	2.28029
296	50	22	bay	4	1.tif	0	0	40	2.44613
297	50	22	bay	4	1.tif	0	0	38	2.55493
298	50	22	bay	4	1.tif	0	0	36	2.60819
299	50	22	bay	4	1.tif	0	0	34	2.08697
300	50	22	bay	4	1.tif	0	0	32	1.95256
301	50	22	bay	4	1.tif	0	0	30	1.9341
302	50	22	bay	4	1.tif	0	0	28	2.12756
303	50	22	bay	4	1.tif	0	0	26	2.15012
304	50	22	bay	4	1.tif	0	0	24	2.25346
305	50	22	bay	4	1.tif	0	0	22	2.232
306	50	22	bay	4	1.tif	0	0	20	1.78894
307	50	22	bay	4	1.tif	0	0	18	2.47654
308	50	22	bay	4	1.tif	0	0	16	2.32391
309	50	22	bay	4	1.tif	0	0	14	1.84293
310	50	22	bay	4	1.tif	0	0	12	1.68196
311	50	22	bay	4	1.tif	0	0	10	1.57216
312	50	22	bay	4	1.tif	0	0	8	1.61244
313	50	22	bay	4	1.tif	0	0	6	1.77464
314	50	22	bay	4	1.tif	0	0	4	1.46795
315	50	22	bay	4	1.tif	0	0	2	1.12486
316	50	22	bay	4	1.tif	0	0	1.27222e-13	1.29126
317	50	22	bay	4	1.tif	0	0	2	1.12418
318	50	22	bay	4	1.tif	0	0	4	0.795794
319	50	22	bay	4	1.tif	0	0	6	0.69548
320	50	22	bay	4	1.tif	0	0	8	0.78684
321	50	22	bay	4	1.tif	0	0	10	0.617588
322	50	22	bay	4	1.tif	0	0	12	0.690452
323	50	22	bay	4	1.tif	0	0	14	0.678649
324	50	22	bay	4	1.tif	0	0	16	0.855343
325	50	22	bay	4	1.tif	0	0	18	0.834454
326	50	22	bay	4	1.tif	0	0	20	0.905947
327	50	22	bay	4	1.tif	0	0	22	0.87919
328	50	22	bay	4	1.tif	0	0	24	0.89742
329	50	22	bay	4	1.tif	0	0	26	0.929347
330	50	22	bay	4	1.tif	0	0	28	0.7488
331	50	22	bay	4	1.tif	0	0	30	0.961969
332	50	22	bay	4	1.tif	0	0	32	1.0351
333	50	22	bay	4	1.tif	0	0	34	1.02341
334	50	22	bay	4	1.tif	0	0	36	0.909917
335	50	22	bay	4	1.tif	0	0	38	0.936325
336	50	22	bay	4	1.tif	0	0	40	1.1626
337	50	22	bay	4	1.tif	0	0	42	1.02901
338	50	22	bay	4	1.tif	0	0	44	0.874932
339	50	22	bay	4	1.tif	0	0	46	0.887826
340	50	22	bay	4	1.tif	0	0	48	0.703606
341	50	22	bay	4	1.tif	0	0	50	0.625531
342	50	22	bay	4	1.tif	0	0	52	0.663763
343	50	22	bay	4	1.tif	0	0	54	0.616354
344	50	22	bay	4	1.tif	0	0	56	0.643988
345	50	22	bay	4	1.tif	0	0	58	0.601938
346	50	22	bay	4	1.tif	0	0	60	0.500957
347	50	22	bay	4	1.tif	0	0	62	0.532874
348	50	22	bay	4	1.tif	0	0	64	0.581227
349	50	22	bay	4	1.tif	0	0	66	0.606093
350	50	22	bay	4	1.tif	0	0	68	0.535374
351	50	22	bay	4	1.tif	0	0	70	0.454733
352	50	22	bay	4	1.tif	0	0	72	0.483915
353	50	22	bay	4	1.tif	0	0	74	0.493376
354	50	22	bay	4	1.tif	0	0	76	0.430512
355	50	22	bay	4	1.tif	0	0	78	0.443336
356	50	22	bay	4	1.tif	0	0	80	0.414177
357	50	22	bay	4	1.tif	0	0	82	0.46713
358	50	22	bay	4	1.tif	0	0	84	0.47357
359	50	22	bay	4	1.tif	0	0	86	0.550888
360	50	22	bay	4	1.tif	0	0	88	0.508188
361	50	22	bay	5	2.tif	0	0	90	0.52539
362	50	22	bay	5	2.tif	0	0	88	0.407599
363	50	22	bay	5	2.tif	0	0	86	0.471963
364	50	22	bay	5	2.tif	0	0	84	0.571562
365	50	22	bay	5	2.tif	0	0	82	0.430493
366	50	22	bay	5	2.tif	0	0	80	0.396466
367	50	22	bay	5	2.tif	0	0	78	0.456153
368	50	22	bay	5	2.tif	0	0	76	0.512575
369	50	22	bay	5	2.tif	0	0	74	0.565729
370	50	22	bay	5	2.tif	0	0	72	0.709894
371	50	22	bay	5	2.tif	0	0	70	0.630136
372	50	22	bay	5	2.tif	0	0	68	0.637297
373	50	22	bay	5	2.tif	0	0	66	0.571615
374	50	22	bay	5	2.tif	0	0	64	0.775655
375	50	22	bay	5	2.tif	0	0	62	1.0644
376	50	22	bay	5	2.tif	0	0	60	1.11842
377	50	22	bay	5	2.tif	0	0	58	0.982047
378	50	22	bay	5	2.tif	0	0	56	1.27138
379	50	22	bay	5	2.tif	0	0	54	1.13347
380	50	22	bay	5	2.tif	0	0	52	1.0506
381	50	22	bay	5	2.tif	0	0	50	1.37388
382	50	22	bay	5	2.tif	0	0	48	1.23363
383	50	22	bay	5	2.tif	0	0	46	1.10791
384	50	22	bay	5	2.tif	0	0	44	1.24656
385	50	22	bay	5	2.tif	0	0	42	0.916125
386	50	22	bay	5	2.tif	0	0	40	1.00471
387	50	22	bay	5	2.tif	0	0	38	1.00661
388	50	22	bay	5	2.tif	0	0	36	1.26217
389	50	22	bay	5	2.tif	0	0	34	1.15047
390	50	22	bay	5	2.tif	0	0	32	1.42485
391	50	22	bay	5	2.tif	0	0	30	1.48532
392	50	22	bay	5	2.tif	0	0	28	1.47295
393	50	22	bay	5	2.tif	0	0	26	1.68942
394	50	22	bay	5	2.tif	0	0	24	1.88263
395	50	22	bay	5	2.tif	0	0	22	1.4921
396	50	22	bay	5	2.tif	0	0	20	1.58952
397	50	22	bay	5	2.tif	0	0	18	1.83086
398	50	22	bay	5	2.tif	0	0	16	1.57772
399	50	22	bay	5	2.tif	0	0	14	2.21122
400	50	22	bay	5	2.tif	0	0	12	2.52439
401	50	22	bay	5	2.tif	0	0	10	2.43591
402	50	22	bay	5	2.tif	0	0	8	2.38364
403	50	22	bay	5	2.tif	0	0	6	2.40785
404	50	22	bay	5	2.tif	0	0	4	2.29399
405	50	22	bay	5	2.tif	0	0	2	2.61046
406	50	22	bay	5	2.tif	0	0	1.27222e-13	2.43623
407	50	22	bay	5	2.tif	0	0	2	1.59641
408	50	22	bay	5	2.tif	0	0	4	1.7833
409	50	22	bay	5	2.tif	0	0	6	1.93962
410	50	22	bay	5	2.tif	0	0	8	2.01252
411	50	22	bay	5	2.tif	0	0	10	1.89785
412	50	22	bay	5	2.tif	0	0	12	1.38573
413	50	22	bay	5	2.tif	0	0	14	1.33323
414	50	22	bay	5	2.tif	0	0	16	1.2982
415	50	22	bay	5	2.tif	0	0	18	1.39499
416	50	22	bay	5	2.tif	0	0	20	1.53185
417	50	22	bay	5	2.tif	0	0	22	1.31656
418	50	22	bay	5	2.tif	0	0	24	1.29021
419	50	22	bay	5	2.tif	0	0	26	1.1367
420	50	22	bay	5	2.tif	0	0	28	0.950406
421	50	22	bay	5	2.tif	0	0	30	0.924479
422	50	22	bay	5	2.tif	0	0	32	0.962191
423	50	22	bay	5	2.tif	0	0	34	0.868561
424	50	22	bay	5	2.tif	0	0	36	0.84182
425	50	22	bay	5	2.tif	0	0	38	0.735289
426	50	22	bay	5	2.tif	0	0	40	0.687195
427	50	22	bay	5	2.tif	0	0	42	0.639668
428	50	22	bay	5	2.tif	0	0	44	0.778548
429	50	22	bay	5	2.tif	0	0	46	0.705868
430	50	22	bay	5	2.tif	0	0	48	0.86531
431	50	22	bay	5	2.tif	0	0	50	0.835447
432	50	22	bay	5	2.tif	0	0	52	0.860333
433	50	22	bay	5	2.tif	0	0	54	0.795056
434	50	22	bay	5	2.tif	0	0	56	0.853629
435	50	22	bay	5	2.tif	0	0	58	0.897531
436	50	22	bay	5	2.tif	0	0	60	0.848526
437	50	22	bay	5	2.tif	0	0	62	0.796182
438	50	22	bay	5	2.tif	0	0	64	0.620174
439	50	22	bay	5	2.tif	0	0	66	0.557743
440	50	22	bay	5	2.tif	0	0	68	0.679667
441	50	22	bay	5	2.tif	0	0	70	0.587098
442	50	22	bay	5	2.tif	0	0	72	0.592966
443	50	22	bay	5	2.tif	0	0	74	0.540727
444	50	22	bay	5	2.tif	0	0	76	0.520684
445	50	22	bay	5	2.tif	0	0	78	0.431348
446	50	22	bay	5	2.tif	0	0	80	0.443212
447	50	22	bay	5	2.tif	0	0	82	0.523304
448	50	22	bay	5	2.tif	0	0	84	0.531882
449	50	22	bay	5	2.tif	0	0	86	0.465346
450	50	22	bay	5	2.tif	0	0	88	0.408685
451	50	22	bay	6	3.tif	0	0	90	0.550355
452	50	22	bay	6	3.tif	0	0	88	0.381139
453	50	22	bay	6	3.tif	0	0	86	0.414093
454	50	22	bay	6	3.tif	0	0	84	0.506437
455	50	22	bay	6	3.tif	0	0	82	0.698588
456	50	22	bay	6	3.tif	0	0	80	0.643362
457	50	22	bay	6	3.tif	0	0	78	0.58882
458	50	22	bay	6	3.tif	0	0	76	0.65925
459	50	22	bay	6	3.tif	0	0	74	0.604784
460	50	22	bay	6	3.tif	0	0	72	0.603819
461	50	22	bay	6	3.tif	0	0	70	0.530413
462	50	22	bay	6	3.tif	0	0	68	0.547268
463	50	22	bay	6	3.tif	0	0	66	0.533497
464	50	22	bay	6	3.tif	0	0	64	0.693564
465	50	22	bay	6	3.tif	0	0	62	0.718994
466	50	22	bay	6	3.tif	0	0	60	0.583822
467	50	22	bay	6	3.tif	0	0	58	0.525881
468	50	22	bay	6	3.tif	0	0	56	0.559658
469	50	22	bay	6	3.tif	0	0	54	0.745758
470	50	22	bay	6	3.tif	0	0	52	0.753347
471	50	22	bay	6	3.tif	0	0	50	0.965566
472	50	22	bay	6	3.tif	0	0	48	1.04125
473	50	22	bay	6	3.tif	0	0	46	1.20735
474	50	22	bay	6	3.tif	0	0	44	1.42985
475	50	22	bay	6	3.tif	0	0	42	1.5084
476	50	22	bay	6	3.tif	0	0	40	1.44646
477	50	22	bay	6	3.tif	0	0	38	1.6435
478	50	22	bay	6	3.tif	0	0	36	1.66038
479	50	22	bay	6	3.tif	0	0	34	1.30354
480	50	22	bay	6	3.tif	0	0	32	1.52765
481	50	22	bay	6	3.tif	0	0	30	1.74207
482	50	22	bay	6	3.tif	0	0	28	1.50921
483	50	22	bay	6	3.tif	0	0	26	1.55444
484	50	22	bay	6	3.tif	0	0	24	1.89695
485	50	22	bay	6	3.tif	0	0	22	2.06854
486	50	22	bay	6	3.tif	0	0	20	1.82746
487	50	22	bay	6	3.tif	0	0	18	1.74205
488	50	22	bay	6	3.tif	0	0	16	1.70374
489	50	22	bay	6	3.tif	0	0	14	1.71493
490	50	22	bay	6	3.tif	0	0	12	2.10733
491	50	22	bay	6	3.tif	0	0	10	2.57629
492	50	22	bay	6	3.tif	0	0	8	1.99601
493	50	22	bay	6	3.tif	0	0	6	1.81419
494	50	22	bay	6	3.tif	0	0	4	1.67782
495	50	22	bay	6	3.tif	0	0	2	2.07533
496	50	22	bay	6	3.tif	0	0	1.27222e-13	2.3843
497	50	22	bay	6	3.tif	0	0	2	1.64871
498	50	22	bay	6	3.tif	0	0	4	1.95267
499	50	22	bay	6	3.tif	0	0	6	1.59968
500	50	22	bay	6	3.tif	0	0	8	1.59707
501	50	22	bay	6	3.tif	0	0	10	1.51696
502	50	22	bay	6	3.tif	0	0	12	1.92087
503	50	22	bay	6	3.tif	0	0	14	1.60749
504	50	22	bay	6	3.tif	0	0	16	1.36636
505	50	22	bay	6	3.tif	0	0	18	1.19616
506	50	22	bay	6	3.tif	0	0	20	1.25494
507	50	22	bay	6	3.tif	0	0	22	1.38404
508	50	22	bay	6	3.tif	0	0	24	1.4124
509	50	22	bay	6	3.tif	0	0	26	1.48563
510	50	22	bay	6	3.tif	0	0	28	1.25827
511	50	22	bay	6	3.tif	0	0	30	1.37827
512	50	22	bay	6	3.tif	0	0	32	0.995023
513	50	22	bay	6	3.tif	0	0	34	1.06959
514	50	22	bay	6	3.tif	0	0	36	0.95087
515	50	22	bay	6	3.tif	0	0	38	0.950329
516	50	22	bay	6	3.tif	0	0	40	1.00246
517	50	22	bay	6	3.tif	0	0	42	0.834581
518	50	22	bay	6	3.tif	0	0	44	0.832397
519	50	22	bay	6	3.tif	0	0	46	1.0083
520	50	22	bay	6	3.tif	0	0	48	0.972825
521	50	22	bay	6	3.tif	0	0	50	0.966826
522	50	22	bay	6	3.tif	0	0	52	0.893841
523	50	22	bay	6	3.tif	0	0	54	0.954059
524	50	22	bay	6	3.tif	0	0	56	0.815609
525	50	22	bay	6	3.tif	0	0	58	0.659058
526	50	22	bay	6	3.tif	0	0	60	0.853863
527	50	22	bay	6	3.tif	0	0	62	0.657286
528	50	22	bay	6	3.tif	0	0	64	0.677212
529	50	22	bay	6	3.tif	0	0	66	0.651268
530	50	22	bay	6	3.tif	0	0	68	0.604047
531	50	22	bay	6	3.tif	0	0	70	0.574701
532	50	22	bay	6	3.tif	0	0	72	0.635597
533	50	22	bay	6	3.tif	0	0	74	0.536763
534	50	22	bay	6	3.tif	0	0	76	0.519887
535	50	22	bay	6	3.tif	0	0	78	0.47482
536	50	22	bay	6	3.tif	0	0	80	0.466775
537	50	22	bay	6	3.tif	0	0	82	0.518348
538	50	22	bay	6	3.tif	0	0	84	0.451725
539	50	22	bay	6	3.tif	0	0	86	0.473501
540	50	22	bay	6	3.tif	0	0	88	0.451473
541	50	22	bay	7	1.tif	0	0	90	0.556167
542	50	22	bay	7	1.tif	0	0	88	0.485304
543	50	22	bay	7	1.tif	0	0	86	0.486981
544	50	22	bay	7	1.tif	0	0	84	0.522295
545	50	22	bay	7	1.tif	0	0	82	0.538305
546	50	22	bay	7	1.tif	0	0	80	0.559021
547	50	22	bay	7	1.tif	0	0	78	0.584248
548	50	22	bay	7	1.tif	0	0	76	0.595932
549	50	22	bay	7	1.tif	0	0	74	0.736566
550	50	22	bay	7	1.tif	0	0	72	0.753727
551	50	22	bay	7	1.tif	0	0	70	0.740552
552	50	22	bay	7	1.tif	0	0	68	0.784466
553	50	22	bay	7	1.tif	0	0	66	1.09004
554	50	22	bay	7	1.tif	0	0	64	1.08421
555	50	22	bay	7	1.tif	0	0	62	1.08998
556	50	22	bay	7	1.tif	0	0	60	1.30619
557	50	22	bay	7	1.tif	0	0	58	1.49666
558	50	22	bay	7	1.tif	0	0	56	1.54252
559	50	22	bay	7	1.tif	0	0	54	1.50262
560	50	22	bay	7	1.tif	0	0	52	1.52328
561	50	22	bay	7	1.tif	0	0	50	1.80737
562	50	22	bay	7	1.tif	0	0	48	2.0956
563	50	22	bay	7	1.tif	0	0	46	2.04344
564	50	22	bay	7	1.tif	0	0	44	2.09668
565	50	22	bay	7	1.tif	0	0	42	2.30595
566	50	22	bay	7	1.tif	0	0	40	2.12381
567	50	22	bay	7	1.tif	0	0	38	2.23739
568	50	22	bay	7	1.tif	0	0	36	1.7116
569	50	22	bay	7	1.tif	0	0	34	1.17815
570	50	22	bay	7	1.tif	0	0	32	1.29339
571	50	22	bay	7	1.tif	0	0	30	1.12509
572	50	22	bay	7	1.tif	0	0	28	1.27488
573	50	22	bay	7	1.tif	0	0	26	1.4731
574	50	22	bay	7	1.tif	0	0	24	1.34547
575	50	22	bay	7	1.tif	0	0	22	1.29517
576	50	22	bay	7	1.tif	0	0	20	1.21025
577	50	22	bay	7	1.tif	0	0	18	1.24114
578	50	22	bay	7	1.tif	0	0	16	1.36159
579	50	22	bay	7	1.tif	0	0	14	1.30699
580	50	22	bay	7	1.tif	0	0	12	1.53078
581	50	22	bay	7	1.tif	0	0	10	1.62724
582	50	22	bay	7	1.tif	0	0	8	1.31646
583	50	22	bay	7	1.tif	0	0	6	1.41601
584	50	22	bay	7	1.tif	0	0	4	1.20694
585	50	22	bay	7	1.tif	0	0	2	1.41477
586	50	22	bay	7	1.tif	0	0	1.27222e-13	1.37475
587	50	22	bay	7	1.tif	0	0	2	1.09907
588	50	22	bay	7	1.tif	0	0	4	1.12727
589	50	22	bay	7	1.tif	0	0	6	1.05332
590	50	22	bay	7	1.tif	0	0	8	0.961428
591	50	22	bay	7	1.tif	0	0	10	0.85752
592	50	22	bay	7	1.tif	0	0	12	1.02107
593	50	22	bay	7	1.tif	0	0	14	1.2434
594	50	22	bay	7	1.tif	0	0	16	1.38329
595	50	22	bay	7	1.tif	0	0	18	1.53811
596	50	22	bay	7	1.tif	0	0	20	1.46692
597	50	22	bay	7	1.tif	0	0	22	1.25876
598	50	22	bay	7	1.tif	0	0	24	1.13331
599	50	22	bay	7	1.tif	0	0	26	1.18297
600	50	22	bay	7	1.tif	0	0	28	1.53678
601	50	22	bay	7	1.tif	0	0	30	1.32005
602	50	22	bay	7	1.tif	0	0	32	1.40601
603	50	22	bay	7	1.tif	0	0	34	1.16494
604	50	22	bay	7	1.tif	0	0	36	1.01681
605	50	22	bay	7	1.tif	0	0	38	0.941531
606	50	22	bay	7	1.tif	0	0	40	0.882075
607	50	22	bay	7	1.tif	0	0	42	0.891811
608	50	22	bay	7	1.tif	0	0	44	0.93071
609	50	22	bay	7	1.tif	0	0	46	0.969214
610	50	22	bay	7	1.tif	0	0	48	1.0444
611	50	22	bay	7	1.tif	0	0	50	1.11416
612	50	22	bay	7	1.tif	0	0	52	1.02332
613	50	22	bay	7	1.tif	0	0	54	0.937502
614	50	22	bay	7	1.tif	0	0	56	0.880737
615	50	22	bay	7	1.tif	0	0	58	0.941836
616	50	22	bay	7	1.tif	0	0	60	0.856896
617	50	22	bay	7	1.tif	0	0	62	0.765179
618	50	22	bay	7	1.tif	0	0	64	0.727397
619	50	22	bay	7	1.tif	0	0	66	0.742489
620	50	22	bay	7	1.tif	0	0	68	0.71875
621	50	22	bay	7	1.tif	0	0	70	0.68959
622	50	22	bay	7	1.tif	0	0	72	0.651292
623	50	22	bay	7	1.tif	0	0	74	0.551564
624	50	22	bay	7	1.tif	0	0	76	0.546589
625	50	22	bay	7	1.tif	0	0	78	0.55457
626	50	22	bay	7	1.tif	0	0	80	0.508671
627	50	22	bay	7	1.tif	0	0	82	0.474565
628	50	22	bay	7	1.tif	0	0	84	0.488301
629	50	22	bay	7	1.tif	0	0	86	0.514288
630	50	22	bay	7	1.tif	0	0	88	0.488461
631	50	22	col	2	4.tif	0	0	90	0.574326
632	50	22	col	2	4.tif	0	0	88	0.471914
633	50	22	col	2	4.tif	0	0	86	0.492584
634	50	22	col	2	4.tif	0	0	84	0.560255
635	50	22	col	2	4.tif	0	0	82	0.629769
636	50	22	col	2	4.tif	0	0	80	0.73249
637	50	22	col	2	4.tif	0	0	78	0.786302
638	50	22	col	2	4.tif	0	0	76	0.91393
639	50	22	col	2	4.tif	0	0	74	1.0569
640	50	22	col	2	4.tif	0	0	72	1.20205
641	50	22	col	2	4.tif	0	0	70	1.2639
642	50	22	col	2	4.tif	0	0	68	1.43139
643	50	22	col	2	4.tif	0	0	66	1.64338
644	50	22	col	2	4.tif	0	0	64	1.50331
645	50	22	col	2	4.tif	0	0	62	1.60492
646	50	22	col	2	4.tif	0	0	60	1.93368
647	50	22	col	2	4.tif	0	0	58	1.95454
648	50	22	col	2	4.tif	0	0	56	1.73464
649	50	22	col	2	4.tif	0	0	54	1.64017
650	50	22	col	2	4.tif	0	0	52	2.22379
651	50	22	col	2	4.tif	0	0	50	1.80538
652	50	22	col	2	4.tif	0	0	48	1.32656
653	50	22	col	2	4.tif	0	0	46	1.6053
654	50	22	col	2	4.tif	0	0	44	1.52544
655	50	22	col	2	4.tif	0	0	42	1.48439
656	50	22	col	2	4.tif	0	0	40	1.40629
657	50	22	col	2	4.tif	0	0	38	1.51243
658	50	22	col	2	4.tif	0	0	36	1.59556
659	50	22	col	2	4.tif	0	0	34	1.43719
660	50	22	col	2	4.tif	0	0	32	1.11928
661	50	22	col	2	4.tif	0	0	30	1.04734
662	50	22	col	2	4.tif	0	0	28	1.2082
663	50	22	col	2	4.tif	0	0	26	1.47732
664	50	22	col	2	4.tif	0	0	24	1.20419
665	50	22	col	2	4.tif	0	0	22	1.391
666	50	22	col	2	4.tif	0	0	20	1.14003
667	50	22	col	2	4.tif	0	0	18	1.09708
668	50	22	col	2	4.tif	0	0	16	0.997082
669	50	22	col	2	4.tif	0	0	14	1.04674
670	50	22	col	2	4.tif	0	0	12	1.17487
671	50	22	col	2	4.tif	0	0	10	1.1884
672	50	22	col	2	4.tif	0	0	8	0.90964
673	50	22	col	2	4.tif	0	0	6	1.00246
674	50	22	col	2	4.tif	0	0	4	1.22803
675	50	22	col	2	4.tif	0	0	2	1.48464
676	50	22	col	2	4.tif	0	0	1.27222e-13	1.18131
677	50	22	col	2	4.tif	0	0	2	0.944615
678	50	22	col	2	4.tif	0	0	4	1.00875
679	50	22	col	2	4.tif	0	0	6	1.24642
680	50	22	col	2	4.tif	0	0	8	1.12227
681	50	22	col	2	4.tif	0	0	10	1.22146
682	50	22	col	2	4.tif	0	0	12	1.15896
683	50	22	col	2	4.tif	0	0	14	0.99741
684	50	22	col	2	4.tif	0	0	16	1.20063
685	50	22	col	2	4.tif	0	0	18	1.25231
686	50	22	col	2	4.tif	0	0	20	1.19652
687	50	22	col	2	4.tif	0	0	22	1.30074
688	50	22	col	2	4.tif	0	0	24	1.14897
689	50	22	col	2	4.tif	0	0	26	0.970258
690	50	22	col	2	4.tif	0	0	28	1.08286
691	50	22	col	2	4.tif	0	0	30	0.897544
692	50	22	col	2	4.tif	0	0	32	0.989352
693	50	22	col	2	4.tif	0	0	34	0.957945
694	50	22	col	2	4.tif	0	0	36	1.02064
695	50	22	col	2	4.tif	0	0	38	1.05645
696	50	22	col	2	4.tif	0	0	40	1.01162
697	50	22	col	2	4.tif	0	0	42	1.12399
698	50	22	col	2	4.tif	0	0	44	1.11078
699	50	22	col	2	4.tif	0	0	46	1.21883
700	50	22	col	2	4.tif	0	0	48	1.75502
701	50	22	col	2	4.tif	0	0	50	1.47537
702	50	22	col	2	4.tif	0	0	52	1.05365
703	50	22	col	2	4.tif	0	0	54	1.11719
704	50	22	col	2	4.tif	0	0	56	1.07381
705	50	22	col	2	4.tif	0	0	58	0.91734
706	50	22	col	2	4.tif	0	0	60	0.925966
707	50	22	col	2	4.tif	0	0	62	0.895653
708	50	22	col	2	4.tif	0	0	64	0.96778
709	50	22	col	2	4.tif	0	0	66	0.789351
710	50	22	col	2	4.tif	0	0	68	0.718739
711	50	22	col	2	4.tif	0	0	70	0.642824
712	50	22	col	2	4.tif	0	0	72	0.624239
713	50	22	col	2	4.tif	0	0	74	0.557203
714	50	22	col	2	4.tif	0	0	76	0.507602
715	50	22	col	2	4.tif	0	0	78	0.567795
716	50	22	col	2	4.tif	0	0	80	0.513558
717	50	22	col	2	4.tif	0	0	82	0.483341
718	50	22	col	2	4.tif	0	0	84	0.377248
719	50	22	col	2	4.tif	0	0	86	0.401366
720	50	22	col	2	4.tif	0	0	88	0.445193
721	50	22	col	3	3.tif	0	0	90	0.58033
722	50	22	col	3	3.tif	0	0	88	0.520893
723	50	22	col	3	3.tif	0	0	86	0.483426
724	50	22	col	3	3.tif	0	0	84	0.490476
725	50	22	col	3	3.tif	0	0	82	0.54457
726	50	22	col	3	3.tif	0	0	80	0.612796
727	50	22	col	3	3.tif	0	0	78	0.700828
728	50	22	col	3	3.tif	0	0	76	0.657219
729	50	22	col	3	3.tif	0	0	74	0.717856
730	50	22	col	3	3.tif	0	0	72	0.746093
731	50	22	col	3	3.tif	0	0	70	0.793104
732	50	22	col	3	3.tif	0	0	68	0.859791
733	50	22	col	3	3.tif	0	0	66	1.06903
734	50	22	col	3	3.tif	0	0	64	1.25655
735	50	22	col	3	3.tif	0	0	62	1.56904
736	50	22	col	3	3.tif	0	0	60	1.7611
737	50	22	col	3	3.tif	0	0	58	1.53823
738	50	22	col	3	3.tif	0	0	56	1.4936
739	50	22	col	3	3.tif	0	0	54	1.45358
740	50	22	col	3	3.tif	0	0	52	1.47673
741	50	22	col	3	3.tif	0	0	50	1.40975
742	50	22	col	3	3.tif	0	0	48	1.58203
743	50	22	col	3	3.tif	0	0	46	1.55293
744	50	22	col	3	3.tif	0	0	44	1.70807
745	50	22	col	3	3.tif	0	0	42	1.78579
746	50	22	col	3	3.tif	0	0	40	1.78779
747	50	22	col	3	3.tif	0	0	38	2.07241
748	50	22	col	3	3.tif	0	0	36	2.37778
749	50	22	col	3	3.tif	0	0	34	2.64748
750	50	22	col	3	3.tif	0	0	32	2.10672
751	50	22	col	3	3.tif	0	0	30	2.0612
752	50	22	col	3	3.tif	0	0	28	1.63336
753	50	22	col	3	3.tif	0	0	26	1.0469
754	50	22	col	3	3.tif	0	0	24	0.950245
755	50	22	col	3	3.tif	0	0	22	0.965859
756	50	22	col	3	3.tif	0	0	20	1.06946
757	50	22	col	3	3.tif	0	0	18	0.973931
758	50	22	col	3	3.tif	0	0	16	0.888267
759	50	22	col	3	3.tif	0	0	14	0.837531
760	50	22	col	3	3.tif	0	0	12	0.925773
761	50	22	col	3	3.tif	0	0	10	1.0919
762	50	22	col	3	3.tif	0	0	8	1.00615
763	50	22	col	3	3.tif	0	0	6	0.855199
764	50	22	col	3	3.tif	0	0	4	0.78978
765	50	22	col	3	3.tif	0	0	2	1.0526
766	50	22	col	3	3.tif	0	0	1.27222e-13	1.54082
767	50	22	col	3	3.tif	0	0	2	1.25603
768	50	22	col	3	3.tif	0	0	4	1.06357
769	50	22	col	3	3.tif	0	0	6	1.128
770	50	22	col	3	3.tif	0	0	8	1.30798
771	50	22	col	3	3.tif	0	0	10	1.27345
772	50	22	col	3	3.tif	0	0	12	1.19183
773	50	22	col	3	3.tif	0	0	14	0.935475
774	50	22	col	3	3.tif	0	0	16	0.834393
775	50	22	col	3	3.tif	0	0	18	0.913262
776	50	22	col	3	3.tif	0	0	20	0.780131
777	50	22	col	3	3.tif	0	0	22	0.789798
778	50	22	col	3	3.tif	0	0	24	0.757236
779	50	22	col	3	3.tif	0	0	26	0.888848
780	50	22	col	3	3.tif	0	0	28	0.959557
781	50	22	col	3	3.tif	0	0	30	1.06175
782	50	22	col	3	3.tif	0	0	32	1.05774
783	50	22	col	3	3.tif	0	0	34	1.11823
784	50	22	col	3	3.tif	0	0	36	1.21218
785	50	22	col	3	3.tif	0	0	38	1.24675
786	50	22	col	3	3.tif	0	0	40	1.28661
787	50	22	col	3	3.tif	0	0	42	1.25415
788	50	22	col	3	3.tif	0	0	44	1.23122
789	50	22	col	3	3.tif	0	0	46	1.45077
790	50	22	col	3	3.tif	0	0	48	1.27802
791	50	22	col	3	3.tif	0	0	50	1.18226
792	50	22	col	3	3.tif	0	0	52	1.0457
793	50	22	col	3	3.tif	0	0	54	1.09631
794	50	22	col	3	3.tif	0	0	56	1.13061
795	50	22	col	3	3.tif	0	0	58	1.15839
796	50	22	col	3	3.tif	0	0	60	1.10855
797	50	22	col	3	3.tif	0	0	62	1.15043
798	50	22	col	3	3.tif	0	0	64	1.04835
799	50	22	col	3	3.tif	0	0	66	1.0756
800	50	22	col	3	3.tif	0	0	68	0.948998
801	50	22	col	3	3.tif	0	0	70	0.807866
802	50	22	col	3	3.tif	0	0	72	0.736193
803	50	22	col	3	3.tif	0	0	74	0.624045
804	50	22	col	3	3.tif	0	0	76	0.75156
805	50	22	col	3	3.tif	0	0	78	0.806955
806	50	22	col	3	3.tif	0	0	80	0.665461
807	50	22	col	3	3.tif	0	0	82	0.530472
808	50	22	col	3	3.tif	0	0	84	0.583115
809	50	22	col	3	3.tif	0	0	86	0.627225
810	50	22	col	3	3.tif	0	0	88	0.599906
811	50	22	col	4	2.tif	0	0	90	0.465381
812	50	22	col	4	2.tif	0	0	88	0.409271
813	50	22	col	4	2.tif	0	0	86	0.400284
814	50	22	col	4	2.tif	0	0	84	0.411618
815	50	22	col	4	2.tif	0	0	82	0.399767
816	50	22	col	4	2.tif	0	0	80	0.398052
817	50	22	col	4	2.tif	0	0	78	0.401447
818	50	22	col	4	2.tif	0	0	76	0.37579
819	50	22	col	4	2.tif	0	0	74	0.575578
820	50	22	col	4	2.tif	0	0	72	0.798167
821	50	22	col	4	2.tif	0	0	70	0.856379
822	50	22	col	4	2.tif	0	0	68	1.3048
823	50	22	col	4	2.tif	0	0	66	1.53152
824	50	22	col	4	2.tif	0	0	64	1.25017
825	50	22	col	4	2.tif	0	0	62	1.08132
826	50	22	col	4	2.tif	0	0	60	0.967673
827	50	22	col	4	2.tif	0	0	58	0.9037
828	50	22	col	4	2.tif	0	0	56	0.999841
829	50	22	col	4	2.tif	0	0	54	1.10592
830	50	22	col	4	2.tif	0	0	52	1.17817
831	50	22	col	4	2.tif	0	0	50	1.14631
832	50	22	col	4	2.tif	0	0	48	1.06139
833	50	22	col	4	2.tif	0	0	46	1.15152
834	50	22	col	4	2.tif	0	0	44	1.08262
835	50	22	col	4	2.tif	0	0	42	1.23274
836	50	22	col	4	2.tif	0	0	40	1.3982
837	50	22	col	4	2.tif	0	0	38	1.12629
838	50	22	col	4	2.tif	0	0	36	0.942153
839	50	22	col	4	2.tif	0	0	34	0.784275
840	50	22	col	4	2.tif	0	0	32	0.873176
841	50	22	col	4	2.tif	0	0	30	1.0634
842	50	22	col	4	2.tif	0	0	28	0.906194
843	50	22	col	4	2.tif	0	0	26	0.963509
844	50	22	col	4	2.tif	0	0	24	0.830784
845	50	22	col	4	2.tif	0	0	22	0.73237
846	50	22	col	4	2.tif	0	0	20	0.720489
847	50	22	col	4	2.tif	0	0	18	0.716547
848	50	22	col	4	2.tif	0	0	16	0.700474
849	50	22	col	4	2.tif	0	0	14	0.795568
850	50	22	col	4	2.tif	0	0	12	0.825001
851	50	22	col	4	2.tif	0	0	10	0.677723
852	50	22	col	4	2.tif	0	0	8	0.793042
853	50	22	col	4	2.tif	0	0	6	0.847348
854	50	22	col	4	2.tif	0	0	4	0.92395
855	50	22	col	4	2.tif	0	0	2	0.920503
856	50	22	col	4	2.tif	0	0	1.27222e-13	1.18165
857	50	22	col	4	2.tif	0	0	2	1.44847
858	50	22	col	4	2.tif	0	0	4	1.66835
859	50	22	col	4	2.tif	0	0	6	1.46527
860	50	22	col	4	2.tif	0	0	8	1.36716
861	50	22	col	4	2.tif	0	0	10	1.57773
862	50	22	col	4	2.tif	0	0	12	1.46329
863	50	22	col	4	2.tif	0	0	14	1.42369
864	50	22	col	4	2.tif	0	0	16	1.46102
865	50	22	col	4	2.tif	0	0	18	1.40625
866	50	22	col	4	2.tif	0	0	20	1.13976
867	50	22	col	4	2.tif	0	0	22	1.42768
868	50	22	col	4	2.tif	0	0	24	1.87099
869	50	22	col	4	2.tif	0	0	26	1.81917
870	50	22	col	4	2.tif	0	0	28	1.83501
871	50	22	col	4	2.tif	0	0	30	2.1173
872	50	22	col	4	2.tif	0	0	32	1.96745
873	50	22	col	4	2.tif	0	0	34	1.90974
874	50	22	col	4	2.tif	0	0	36	2.03945
875	50	22	col	4	2.tif	0	0	38	2.24639
876	50	22	col	4	2.tif	0	0	40	2.46735
877	50	22	col	4	2.tif	0	0	42	2.33081
878	50	22	col	4	2.tif	0	0	44	1.73944
879	50	22	col	4	2.tif	0	0	46	1.52375
880	50	22	col	4	2.tif	0	0	48	1.42211
881	50	22	col	4	2.tif	0	0	50	1.72225
882	50	22	col	4	2.tif	0	0	52	1.87817
883	50	22	col	4	2.tif	0	0	54	1.80992
884	50	22	col	4	2.tif	0	0	56	1.64002
885	50	22	col	4	2.tif	0	0	58	1.69646
886	50	22	col	4	2.tif	0	0	60	1.13182
887	50	22	col	4	2.tif	0	0	62	0.986042
888	50	22	col	4	2.tif	0	0	64	0.971386
889	50	22	col	4	2.tif	0	0	66	0.867826
890	50	22	col	4	2.tif	0	0	68	0.802014
891	50	22	col	4	2.tif	0	0	70	0.761115
892	50	22	col	4	2.tif	0	0	72	0.695015
893	50	22	col	4	2.tif	0	0	74	0.615433
894	50	22	col	4	2.tif	0	0	76	0.510387
895	50	22	col	4	2.tif	0	0	78	0.491427
896	50	22	col	4	2.tif	0	0	80	0.492047
897	50	22	col	4	2.tif	0	0	82	0.427688
898	50	22	col	4	2.tif	0	0	84	0.374522
899	50	22	col	4	2.tif	0	0	86	0.395135
900	50	22	col	4	2.tif	0	0	88	0.381631
901	50	22	col	5	1.tif	0	0	90	0.628664
902	50	22	col	5	1.tif	0	0	88	0.526012
903	50	22	col	5	1.tif	0	0	86	0.56082
904	50	22	col	5	1.tif	0	0	84	0.655684
905	50	22	col	5	1.tif	0	0	82	0.68981
906	50	22	col	5	1.tif	0	0	80	0.624155
907	50	22	col	5	1.tif	0	0	78	0.72886
908	50	22	col	5	1.tif	0	0	76	0.741871
909	50	22	col	5	1.tif	0	0	74	0.902668
910	50	22	col	5	1.tif	0	0	72	0.894191
911	50	22	col	5	1.tif	0	0	70	0.836304
912	50	22	col	5	1.tif	0	0	68	0.839388
913	50	22	col	5	1.tif	0	0	66	1.11584
914	50	22	col	5	1.tif	0	0	64	1.11401
915	50	22	col	5	1.tif	0	0	62	1.0296
916	50	22	col	5	1.tif	0	0	60	1.46831
917	50	22	col	5	1.tif	0	0	58	1.65209
918	50	22	col	5	1.tif	0	0	56	1.55491
919	50	22	col	5	1.tif	0	0	54	1.71349
920	50	22	col	5	1.tif	0	0	52	2.14279
921	50	22	col	5	1.tif	0	0	50	2.16345
922	50	22	col	5	1.tif	0	0	48	1.96954
923	50	22	col	5	1.tif	0	0	46	1.87316
924	50	22	col	5	1.tif	0	0	44	1.4883
925	50	22	col	5	1.tif	0	0	42	1.51345
926	50	22	col	5	1.tif	0	0	40	1.64641
927	50	22	col	5	1.tif	0	0	38	1.56396
928	50	22	col	5	1.tif	0	0	36	1.68588
929	50	22	col	5	1.tif	0	0	34	1.62253
930	50	22	col	5	1.tif	0	0	32	1.30652
931	50	22	col	5	1.tif	0	0	30	1.21529
932	50	22	col	5	1.tif	0	0	28	1.16335
933	50	22	col	5	1.tif	0	0	26	1.02467
934	50	22	col	5	1.tif	0	0	24	1.12306
935	50	22	col	5	1.tif	0	0	22	0.929787
936	50	22	col	5	1.tif	0	0	20	0.822611
937	50	22	col	5	1.tif	0	0	18	0.871715
938	50	22	col	5	1.tif	0	0	16	0.847759
939	50	22	col	5	1.tif	0	0	14	0.826917
940	50	22	col	5	1.tif	0	0	12	0.896407
941	50	22	col	5	1.tif	0	0	10	0.887648
942	50	22	col	5	1.tif	0	0	8	1.09789
943	50	22	col	5	1.tif	0	0	6	1.23646
944	50	22	col	5	1.tif	0	0	4	1.65218
945	50	22	col	5	1.tif	0	0	2	1.55018
946	50	22	col	5	1.tif	0	0	1.27222e-13	1.65248
947	50	22	col	5	1.tif	0	0	2	1.23121
948	50	22	col	5	1.tif	0	0	4	0.872717
949	50	22	col	5	1.tif	0	0	6	0.998332
950	50	22	col	5	1.tif	0	0	8	0.912971
951	50	22	col	5	1.tif	0	0	10	0.898082
952	50	22	col	5	1.tif	0	0	12	0.786516
953	50	22	col	5	1.tif	0	0	14	0.830767
954	50	22	col	5	1.tif	0	0	16	0.803106
955	50	22	col	5	1.tif	0	0	18	0.968657
956	50	22	col	5	1.tif	0	0	20	1.3484
957	50	22	col	5	1.tif	0	0	22	1.43692
958	50	22	col	5	1.tif	0	0	24	1.05994
959	50	22	col	5	1.tif	0	0	26	1.14026
960	50	22	col	5	1.tif	0	0	28	1.15369
961	50	22	col	5	1.tif	0	0	30	0.943632
962	50	22	col	5	1.tif	0	0	32	1.05195
963	50	22	col	5	1.tif	0	0	34	1.01902
964	50	22	col	5	1.tif	0	0	36	0.992496
965	50	22	col	5	1.tif	0	0	38	0.895589
966	50	22	col	5	1.tif	0	0	40	0.768297
967	50	22	col	5	1.tif	0	0	42	0.983179
968	50	22	col	5	1.tif	0	0	44	1.002
969	50	22	col	5	1.tif	0	0	46	1.6747
970	50	22	col	5	1.tif	0	0	48	1.88081
971	50	22	col	5	1.tif	0	0	50	1.44856
972	50	22	col	5	1.tif	0	0	52	1.28426
973	50	22	col	5	1.tif	0	0	54	1.04674
974	50	22	col	5	1.tif	0	0	56	1.33182
975	50	22	col	5	1.tif	0	0	58	1.08529
976	50	22	col	5	1.tif	0	0	60	1.26097
977	50	22	col	5	1.tif	0	0	62	1.22025
978	50	22	col	5	1.tif	0	0	64	1.03031
979	50	22	col	5	1.tif	0	0	66	0.890514
980	50	22	col	5	1.tif	0	0	68	1.00572
981	50	22	col	5	1.tif	0	0	70	1.03218
982	50	22	col	5	1.tif	0	0	72	1.01639
983	50	22	col	5	1.tif	0	0	74	1.00381
984	50	22	col	5	1.tif	0	0	76	0.783486
985	50	22	col	5	1.tif	0	0	78	0.754059
986	50	22	col	5	1.tif	0	0	80	0.764539
987	50	22	col	5	1.tif	0	0	82	0.714385
988	50	22	col	5	1.tif	0	0	84	0.56784
989	50	22	col	5	1.tif	0	0	86	0.587363
990	50	22	col	5	1.tif	0	0	88	0.467212
991	50	22	sha	2	1.tif	0	0	90	0.932555
992	50	22	sha	2	1.tif	0	0	88	0.874222
993	50	22	sha	2	1.tif	0	0	86	0.945746
994	50	22	sha	2	1.tif	0	0	84	0.988204
995	50	22	sha	2	1.tif	0	0	82	1.10735
996	50	22	sha	2	1.tif	0	0	80	1.1618
997	50	22	sha	2	1.tif	0	0	78	1.1332
998	50	22	sha	2	1.tif	0	0	76	1.30302
999	50	22	sha	2	1.tif	0	0	74	1.46696
1000	50	22	sha	2	1.tif	0	0	72	1.66271
1001	50	22	sha	2	1.tif	0	0	70	1.44851
1002	50	22	sha	2	1.tif	0	0	68	1.45681
1003	50	22	sha	2	1.tif	0	0	66	1.62102
1004	50	22	sha	2	1.tif	0	0	64	2.08997
1005	50	22	sha	2	1.tif	0	0	62	2.54818
1006	50	22	sha	2	1.tif	0	0	60	2.59868
1007	50	22	sha	2	1.tif	0	0	58	2.53339
1008	50	22	sha	2	1.tif	0	0	56	2.40608
1009	50	22	sha	2	1.tif	0	0	54	2.24201
1010	50	22	sha	2	1.tif	0	0	52	2.37961
1011	50	22	sha	2	1.tif	0	0	50	2.17276
1012	50	22	sha	2	1.tif	0	0	48	1.85113
1013	50	22	sha	2	1.tif	0	0	46	2.00968
1014	50	22	sha	2	1.tif	0	0	44	1.76561
1015	50	22	sha	2	1.tif	0	0	42	1.91511
1016	50	22	sha	2	1.tif	0	0	40	1.75011
1017	50	22	sha	2	1.tif	0	0	38	1.36066
1018	50	22	sha	2	1.tif	0	0	36	1.30537
1019	50	22	sha	2	1.tif	0	0	34	1.10945
1020	50	22	sha	2	1.tif	0	0	32	0.892006
1021	50	22	sha	2	1.tif	0	0	30	0.992621
1022	50	22	sha	2	1.tif	0	0	28	1.02117
1023	50	22	sha	2	1.tif	0	0	26	1.1042
1024	50	22	sha	2	1.tif	0	0	24	1.03892
1025	50	22	sha	2	1.tif	0	0	22	0.941179
1026	50	22	sha	2	1.tif	0	0	20	0.949192
1027	50	22	sha	2	1.tif	0	0	18	1.09512
1028	50	22	sha	2	1.tif	0	0	16	0.857417
1029	50	22	sha	2	1.tif	0	0	14	0.910133
1030	50	22	sha	2	1.tif	0	0	12	0.819997
1031	50	22	sha	2	1.tif	0	0	10	0.772284
1032	50	22	sha	2	1.tif	0	0	8	1.29272
1033	50	22	sha	2	1.tif	0	0	6	1.25176
1034	50	22	sha	2	1.tif	0	0	4	1.19067
1035	50	22	sha	2	1.tif	0	0	2	0.894407
1036	50	22	sha	2	1.tif	0	0	1.27222e-13	0.994697
1037	50	22	sha	2	1.tif	0	0	2	0.771
1038	50	22	sha	2	1.tif	0	0	4	0.726745
1039	50	22	sha	2	1.tif	0	0	6	0.618218
1040	50	22	sha	2	1.tif	0	0	8	0.621265
1041	50	22	sha	2	1.tif	0	0	10	0.608526
1042	50	22	sha	2	1.tif	0	0	12	0.58305
1043	50	22	sha	2	1.tif	0	0	14	0.567401
1044	50	22	sha	2	1.tif	0	0	16	0.700043
1045	50	22	sha	2	1.tif	0	0	18	0.578169
1046	50	22	sha	2	1.tif	0	0	20	0.768415
1047	50	22	sha	2	1.tif	0	0	22	0.895254
1048	50	22	sha	2	1.tif	0	0	24	0.596232
1049	50	22	sha	2	1.tif	0	0	26	0.937966
1050	50	22	sha	2	1.tif	0	0	28	0.86412
1051	50	22	sha	2	1.tif	0	0	30	0.792417
1052	50	22	sha	2	1.tif	0	0	32	0.693789
1053	50	22	sha	2	1.tif	0	0	34	0.819799
1054	50	22	sha	2	1.tif	0	0	36	0.853949
1055	50	22	sha	2	1.tif	0	0	38	0.816945
1056	50	22	sha	2	1.tif	0	0	40	0.979681
1057	50	22	sha	2	1.tif	0	0	42	0.950328
1058	50	22	sha	2	1.tif	0	0	44	0.943321
1059	50	22	sha	2	1.tif	0	0	46	0.941372
1060	50	22	sha	2	1.tif	0	0	48	0.907612
1061	50	22	sha	2	1.tif	0	0	50	0.829887
1062	50	22	sha	2	1.tif	0	0	52	0.758564
1063	50	22	sha	2	1.tif	0	0	54	0.705938
1064	50	22	sha	2	1.tif	0	0	56	0.80581
1065	50	22	sha	2	1.tif	0	0	58	0.806047
1066	50	22	sha	2	1.tif	0	0	60	0.905754
1067	50	22	sha	2	1.tif	0	0	62	0.812396
1068	50	22	sha	2	1.tif	0	0	64	0.784461
1069	50	22	sha	2	1.tif	0	0	66	0.705966
1070	50	22	sha	2	1.tif	0	0	68	0.703839
1071	50	22	sha	2	1.tif	0	0	70	0.780874
1072	50	22	sha	2	1.tif	0	0	72	0.763029
1073	50	22	sha	2	1.tif	0	0	74	0.844942
1074	50	22	sha	2	1.tif	0	0	76	0.995117
1075	50	22	sha	2	1.tif	0	0	78	0.936585
1076	50	22	sha	2	1.tif	0	0	80	0.827322
1077	50	22	sha	2	1.tif	0	0	82	0.828842
1078	50	22	sha	2	1.tif	0	0	84	0.842353
1079	50	22	sha	2	1.tif	0	0	86	0.902596
1080	50	22	sha	2	1.tif	0	0	88	0.765663
1081	50	22	sha	3	1.tif	0	0	90	1.02148
1082	50	22	sha	3	1.tif	0	0	88	1.02629
1083	50	22	sha	3	1.tif	0	0	86	1.06429
1084	50	22	sha	3	1.tif	0	0	84	1.09944
1085	50	22	sha	3	1.tif	0	0	82	1.30605
1086	50	22	sha	3	1.tif	0	0	80	1.22432
1087	50	22	sha	3	1.tif	0	0	78	1.23632
1088	50	22	sha	3	1.tif	0	0	76	1.51305
1089	50	22	sha	3	1.tif	0	0	74	1.61134
1090	50	22	sha	3	1.tif	0	0	72	1.39843
1091	50	22	sha	3	1.tif	0	0	70	1.78846
1092	50	22	sha	3	1.tif	0	0	68	2.24847
1093	50	22	sha	3	1.tif	0	0	66	1.85315
1094	50	22	sha	3	1.tif	0	0	64	1.70877
1095	50	22	sha	3	1.tif	0	0	62	1.25119
1096	50	22	sha	3	1.tif	0	0	60	1.26151
1097	50	22	sha	3	1.tif	0	0	58	1.56892
1098	50	22	sha	3	1.tif	0	0	56	1.55703
1099	50	22	sha	3	1.tif	0	0	54	1.48205
1100	50	22	sha	3	1.tif	0	0	52	1.69443
1101	50	22	sha	3	1.tif	0	0	50	1.72233
1102	50	22	sha	3	1.tif	0	0	48	2.06876
1103	50	22	sha	3	1.tif	0	0	46	1.34205
1104	50	22	sha	3	1.tif	0	0	44	0.899279
1105	50	22	sha	3	1.tif	0	0	42	1.17857
1106	50	22	sha	3	1.tif	0	0	40	1.33391
1107	50	22	sha	3	1.tif	0	0	38	1.29776
1108	50	22	sha	3	1.tif	0	0	36	1.57945
1109	50	22	sha	3	1.tif	0	0	34	1.58848
1110	50	22	sha	3	1.tif	0	0	32	0.953756
1111	50	22	sha	3	1.tif	0	0	30	0.837202
1112	50	22	sha	3	1.tif	0	0	28	0.810172
1113	50	22	sha	3	1.tif	0	0	26	0.766644
1114	50	22	sha	3	1.tif	0	0	24	0.610139
1115	50	22	sha	3	1.tif	0	0	22	0.72321
1116	50	22	sha	3	1.tif	0	0	20	0.702824
1117	50	22	sha	3	1.tif	0	0	18	0.761303
1118	50	22	sha	3	1.tif	0	0	16	0.766421
1119	50	22	sha	3	1.tif	0	0	14	0.857256
1120	50	22	sha	3	1.tif	0	0	12	0.793332
1121	50	22	sha	3	1.tif	0	0	10	0.791306
1122	50	22	sha	3	1.tif	0	0	8	0.748736
1123	50	22	sha	3	1.tif	0	0	6	0.645078
1124	50	22	sha	3	1.tif	0	0	4	0.625212
1125	50	22	sha	3	1.tif	0	0	2	0.493972
1126	50	22	sha	3	1.tif	0	0	1.27222e-13	0.657419
1127	50	22	sha	3	1.tif	0	0	2	0.609884
1128	50	22	sha	3	1.tif	0	0	4	0.579491
1129	50	22	sha	3	1.tif	0	0	6	0.561856
1130	50	22	sha	3	1.tif	0	0	8	0.569267
1131	50	22	sha	3	1.tif	0	0	10	0.750822
1132	50	22	sha	3	1.tif	0	0	12	0.833742
1133	50	22	sha	3	1.tif	0	0	14	0.978243
1134	50	22	sha	3	1.tif	0	0	16	0.968662
1135	50	22	sha	3	1.tif	0	0	18	0.870096
1136	50	22	sha	3	1.tif	0	0	20	0.815329
1137	50	22	sha	3	1.tif	0	0	22	0.938202
1138	50	22	sha	3	1.tif	0	0	24	0.791246
1139	50	22	sha	3	1.tif	0	0	26	0.765406
1140	50	22	sha	3	1.tif	0	0	28	0.97751
1141	50	22	sha	3	1.tif	0	0	30	1.15612
1142	50	22	sha	3	1.tif	0	0	32	1.54967
1143	50	22	sha	3	1.tif	0	0	34	1.54408
1144	50	22	sha	3	1.tif	0	0	36	1.69938
1145	50	22	sha	3	1.tif	0	0	38	1.63433
1146	50	22	sha	3	1.tif	0	0	40	1.39113
1147	50	22	sha	3	1.tif	0	0	42	1.22276
1148	50	22	sha	3	1.tif	0	0	44	1.5636
1149	50	22	sha	3	1.tif	0	0	46	1.47066
1150	50	22	sha	3	1.tif	0	0	48	1.35817
1151	50	22	sha	3	1.tif	0	0	50	1.10146
1152	50	22	sha	3	1.tif	0	0	52	0.907702
1153	50	22	sha	3	1.tif	0	0	54	1.01435
1154	50	22	sha	3	1.tif	0	0	56	1.23578
1155	50	22	sha	3	1.tif	0	0	58	1.14023
1156	50	22	sha	3	1.tif	0	0	60	1.26568
1157	50	22	sha	3	1.tif	0	0	62	1.0561
1158	50	22	sha	3	1.tif	0	0	64	1.17638
1159	50	22	sha	3	1.tif	0	0	66	1.12857
1160	50	22	sha	3	1.tif	0	0	68	1.20506
1161	50	22	sha	3	1.tif	0	0	70	1.17067
1162	50	22	sha	3	1.tif	0	0	72	1.04115
1163	50	22	sha	3	1.tif	0	0	74	0.831985
1164	50	22	sha	3	1.tif	0	0	76	0.827583
1165	50	22	sha	3	1.tif	0	0	78	0.766186
1166	50	22	sha	3	1.tif	0	0	80	0.788404
1167	50	22	sha	3	1.tif	0	0	82	0.816303
1168	50	22	sha	3	1.tif	0	0	84	0.757372
1169	50	22	sha	3	1.tif	0	0	86	0.810383
1170	50	22	sha	3	1.tif	0	0	88	0.88943
1171	50	22	sha	4	2.tif	0	0	90	0.6708
1172	50	22	sha	4	2.tif	0	0	88	0.567867
1173	50	22	sha	4	2.tif	0	0	86	0.615564
1174	50	22	sha	4	2.tif	0	0	84	0.607266
1175	50	22	sha	4	2.tif	0	0	82	0.686929
1176	50	22	sha	4	2.tif	0	0	80	0.733383
1177	50	22	sha	4	2.tif	0	0	78	0.822021
1178	50	22	sha	4	2.tif	0	0	76	0.9005
1179	50	22	sha	4	2.tif	0	0	74	0.940067
1180	50	22	sha	4	2.tif	0	0	72	1.10139
1181	50	22	sha	4	2.tif	0	0	70	1.19097
1182	50	22	sha	4	2.tif	0	0	68	1.28667
1183	50	22	sha	4	2.tif	0	0	66	1.1975
1184	50	22	sha	4	2.tif	0	0	64	1.22677
1185	50	22	sha	4	2.tif	0	0	62	1.46699
1186	50	22	sha	4	2.tif	0	0	60	1.60029
1187	50	22	sha	4	2.tif	0	0	58	1.58597
1188	50	22	sha	4	2.tif	0	0	56	1.69271
1189	50	22	sha	4	2.tif	0	0	54	1.73366
1190	50	22	sha	4	2.tif	0	0	52	1.51926
1191	50	22	sha	4	2.tif	0	0	50	0.904032
1192	50	22	sha	4	2.tif	0	0	48	0.840017
1193	50	22	sha	4	2.tif	0	0	46	0.938118
1194	50	22	sha	4	2.tif	0	0	44	0.887906
1195	50	22	sha	4	2.tif	0	0	42	0.738571
1196	50	22	sha	4	2.tif	0	0	40	0.733607
1197	50	22	sha	4	2.tif	0	0	38	0.665738
1198	50	22	sha	4	2.tif	0	0	36	0.761042
1199	50	22	sha	4	2.tif	0	0	34	0.823118
1200	50	22	sha	4	2.tif	0	0	32	0.695
1201	50	22	sha	4	2.tif	0	0	30	0.599712
1202	50	22	sha	4	2.tif	0	0	28	0.666738
1203	50	22	sha	4	2.tif	0	0	26	0.709068
1204	50	22	sha	4	2.tif	0	0	24	0.720352
1205	50	22	sha	4	2.tif	0	0	22	0.8237
1206	50	22	sha	4	2.tif	0	0	20	0.627653
1207	50	22	sha	4	2.tif	0	0	18	0.715092
1208	50	22	sha	4	2.tif	0	0	16	0.667666
1209	50	22	sha	4	2.tif	0	0	14	0.655338
1210	50	22	sha	4	2.tif	0	0	12	0.710916
1211	50	22	sha	4	2.tif	0	0	10	0.789307
1212	50	22	sha	4	2.tif	0	0	8	0.846008
1213	50	22	sha	4	2.tif	0	0	6	1.10974
1214	50	22	sha	4	2.tif	0	0	4	1.13223
1215	50	22	sha	4	2.tif	0	0	2	1.13397
1216	50	22	sha	4	2.tif	0	0	1.27222e-13	1.67344
1217	50	22	sha	4	2.tif	0	0	2	1.05694
1218	50	22	sha	4	2.tif	0	0	4	1.08776
1219	50	22	sha	4	2.tif	0	0	6	0.85803
1220	50	22	sha	4	2.tif	0	0	8	1.21329
1221	50	22	sha	4	2.tif	0	0	10	1.11806
1222	50	22	sha	4	2.tif	0	0	12	1.00948
1223	50	22	sha	4	2.tif	0	0	14	0.961008
1224	50	22	sha	4	2.tif	0	0	16	0.859303
1225	50	22	sha	4	2.tif	0	0	18	0.976477
1226	50	22	sha	4	2.tif	0	0	20	1.06158
1227	50	22	sha	4	2.tif	0	0	22	0.887036
1228	50	22	sha	4	2.tif	0	0	24	0.841904
1229	50	22	sha	4	2.tif	0	0	26	1.31882
1230	50	22	sha	4	2.tif	0	0	28	1.25555
1231	50	22	sha	4	2.tif	0	0	30	1.12089
1232	50	22	sha	4	2.tif	0	0	32	1.66848
1233	50	22	sha	4	2.tif	0	0	34	1.25271
1234	50	22	sha	4	2.tif	0	0	36	1.38032
1235	50	22	sha	4	2.tif	0	0	38	1.90613
1236	50	22	sha	4	2.tif	0	0	40	1.92417
1237	50	22	sha	4	2.tif	0	0	42	1.73996
1238	50	22	sha	4	2.tif	0	0	44	2.08297
1239	50	22	sha	4	2.tif	0	0	46	1.88776
1240	50	22	sha	4	2.tif	0	0	48	1.80229
1241	50	22	sha	4	2.tif	0	0	50	2.11809
1242	50	22	sha	4	2.tif	0	0	52	1.84288
1243	50	22	sha	4	2.tif	0	0	54	1.76453
1244	50	22	sha	4	2.tif	0	0	56	2.08181
1245	50	22	sha	4	2.tif	0	0	58	1.84332
1246	50	22	sha	4	2.tif	0	0	60	1.76405
1247	50	22	sha	4	2.tif	0	0	62	1.54391
1248	50	22	sha	4	2.tif	0	0	64	1.22075
1249	50	22	sha	4	2.tif	0	0	66	1.26971
1250	50	22	sha	4	2.tif	0	0	68	1.39148
1251	50	22	sha	4	2.tif	0	0	70	1.08198
1252	50	22	sha	4	2.tif	0	0	72	1.0251
1253	50	22	sha	4	2.tif	0	0	74	0.820641
1254	50	22	sha	4	2.tif	0	0	76	0.734346
1255	50	22	sha	4	2.tif	0	0	78	0.860506
1256	50	22	sha	4	2.tif	0	0	80	0.799912
1257	50	22	sha	4	2.tif	0	0	82	0.846337
1258	50	22	sha	4	2.tif	0	0	84	0.765145
1259	50	22	sha	4	2.tif	0	0	86	0.708956
1260	50	22	sha	4	2.tif	0	0	88	0.530969
1261	50	22	sha	5	3.tif	0	0	90	0.588634
1262	50	22	sha	5	3.tif	0	0	88	0.507442
1263	50	22	sha	5	3.tif	0	0	86	0.550252
1264	50	22	sha	5	3.tif	0	0	84	0.54904
1265	50	22	sha	5	3.tif	0	0	82	0.545506
1266	50	22	sha	5	3.tif	0	0	80	0.555748
1267	50	22	sha	5	3.tif	0	0	78	0.757913
1268	50	22	sha	5	3.tif	0	0	76	0.776385
1269	50	22	sha	5	3.tif	0	0	74	0.787315
1270	50	22	sha	5	3.tif	0	0	72	0.963364
1271	50	22	sha	5	3.tif	0	0	70	1.0098
1272	50	22	sha	5	3.tif	0	0	68	1.00157
1273	50	22	sha	5	3.tif	0	0	66	1.2717
1274	50	22	sha	5	3.tif	0	0	64	1.43394
1275	50	22	sha	5	3.tif	0	0	62	1.43835
1276	50	22	sha	5	3.tif	0	0	60	1.62156
1277	50	22	sha	5	3.tif	0	0	58	1.60588
1278	50	22	sha	5	3.tif	0	0	56	1.50607
1279	50	22	sha	5	3.tif	0	0	54	1.64158
1280	50	22	sha	5	3.tif	0	0	52	2.10237
1281	50	22	sha	5	3.tif	0	0	50	2.04296
1282	50	22	sha	5	3.tif	0	0	48	2.32952
1283	50	22	sha	5	3.tif	0	0	46	2.16655
1284	50	22	sha	5	3.tif	0	0	44	2.21329
1285	50	22	sha	5	3.tif	0	0	42	2.47206
1286	50	22	sha	5	3.tif	0	0	40	2.25846
1287	50	22	sha	5	3.tif	0	0	38	2.121
1288	50	22	sha	5	3.tif	0	0	36	1.69913
1289	50	22	sha	5	3.tif	0	0	34	1.68697
1290	50	22	sha	5	3.tif	0	0	32	1.74671
1291	50	22	sha	5	3.tif	0	0	30	1.7029
1292	50	22	sha	5	3.tif	0	0	28	1.31188
1293	50	22	sha	5	3.tif	0	0	26	1.31227
1294	50	22	sha	5	3.tif	0	0	24	1.4149
1295	50	22	sha	5	3.tif	0	0	22	1.75883
1296	50	22	sha	5	3.tif	0	0	20	1.59398
1297	50	22	sha	5	3.tif	0	0	18	0.985623
1298	50	22	sha	5	3.tif	0	0	16	0.89188
1299	50	22	sha	5	3.tif	0	0	14	1.06967
1300	50	22	sha	5	3.tif	0	0	12	1.15742
1301	50	22	sha	5	3.tif	0	0	10	0.886665
1302	50	22	sha	5	3.tif	0	0	8	0.907899
1303	50	22	sha	5	3.tif	0	0	6	0.72444
1304	50	22	sha	5	3.tif	0	0	4	0.64906
1305	50	22	sha	5	3.tif	0	0	2	0.654963
1306	50	22	sha	5	3.tif	0	0	1.27222e-13	0.726402
1307	50	22	sha	5	3.tif	0	0	2	0.596733
1308	50	22	sha	5	3.tif	0	0	4	0.616904
1309	50	22	sha	5	3.tif	0	0	6	0.511141
1310	50	22	sha	5	3.tif	0	0	8	0.552189
1311	50	22	sha	5	3.tif	0	0	10	0.565974
1312	50	22	sha	5	3.tif	0	0	12	0.526849
1313	50	22	sha	5	3.tif	0	0	14	0.534238
1314	50	22	sha	5	3.tif	0	0	16	0.565441
1315	50	22	sha	5	3.tif	0	0	18	0.643819
1316	50	22	sha	5	3.tif	0	0	20	0.776615
1317	50	22	sha	5	3.tif	0	0	22	0.746916
1318	50	22	sha	5	3.tif	0	0	24	0.731101
1319	50	22	sha	5	3.tif	0	0	26	0.890128
1320	50	22	sha	5	3.tif	0	0	28	0.712069
1321	50	22	sha	5	3.tif	0	0	30	1.02428
1322	50	22	sha	5	3.tif	0	0	32	1.0124
1323	50	22	sha	5	3.tif	0	0	34	1.12702
1324	50	22	sha	5	3.tif	0	0	36	1.17901
1325	50	22	sha	5	3.tif	0	0	38	1.2465
1326	50	22	sha	5	3.tif	0	0	40	1.1168
1327	50	22	sha	5	3.tif	0	0	42	1.18815
1328	50	22	sha	5	3.tif	0	0	44	1.28649
1329	50	22	sha	5	3.tif	0	0	46	1.26684
1330	50	22	sha	5	3.tif	0	0	48	1.10651
1331	50	22	sha	5	3.tif	0	0	50	1.32763
1332	50	22	sha	5	3.tif	0	0	52	1.2766
1333	50	22	sha	5	3.tif	0	0	54	1.21523
1334	50	22	sha	5	3.tif	0	0	56	1.20968
1335	50	22	sha	5	3.tif	0	0	58	1.52963
1336	50	22	sha	5	3.tif	0	0	60	1.37739
1337	50	22	sha	5	3.tif	0	0	62	1.19349
1338	50	22	sha	5	3.tif	0	0	64	1.23046
1339	50	22	sha	5	3.tif	0	0	66	1.29164
1340	50	22	sha	5	3.tif	0	0	68	1.00909
1341	50	22	sha	5	3.tif	0	0	70	1.02811
1342	50	22	sha	5	3.tif	0	0	72	0.848294
1343	50	22	sha	5	3.tif	0	0	74	0.765272
1344	50	22	sha	5	3.tif	0	0	76	0.681915
1345	50	22	sha	5	3.tif	0	0	78	0.660558
1346	50	22	sha	5	3.tif	0	0	80	0.652586
1347	50	22	sha	5	3.tif	0	0	82	0.62596
1348	50	22	sha	5	3.tif	0	0	84	0.620769
1349	50	22	sha	5	3.tif	0	0	86	0.650235
1350	50	22	sha	5	3.tif	0	0	88	0.581463
1351	50	22	sha	6	4.tif	0	0	90	0.761516
1352	50	22	sha	6	4.tif	0	0	88	0.681071
1353	50	22	sha	6	4.tif	0	0	86	0.713426
1354	50	22	sha	6	4.tif	0	0	84	0.80659
1355	50	22	sha	6	4.tif	0	0	82	0.861457
1356	50	22	sha	6	4.tif	0	0	80	0.890554
1357	50	22	sha	6	4.tif	0	0	78	0.999181
1358	50	22	sha	6	4.tif	0	0	76	1.02261
1359	50	22	sha	6	4.tif	0	0	74	0.920721
1360	50	22	sha	6	4.tif	0	0	72	0.863344
1361	50	22	sha	6	4.tif	0	0	70	1.08489
1362	50	22	sha	6	4.tif	0	0	68	1.19335
1363	50	22	sha	6	4.tif	0	0	66	1.27862
1364	50	22	sha	6	4.tif	0	0	64	1.49049
1365	50	22	sha	6	4.tif	0	0	62	1.47591
1366	50	22	sha	6	4.tif	0	0	60	1.56608
1367	50	22	sha	6	4.tif	0	0	58	2.00515
1368	50	22	sha	6	4.tif	0	0	56	1.70087
1369	50	22	sha	6	4.tif	0	0	54	1.6066
1370	50	22	sha	6	4.tif	0	0	52	1.47591
1371	50	22	sha	6	4.tif	0	0	50	1.25263
1372	50	22	sha	6	4.tif	0	0	48	1.4311
1373	50	22	sha	6	4.tif	0	0	46	2.08003
1374	50	22	sha	6	4.tif	0	0	44	2.07204
1375	50	22	sha	6	4.tif	0	0	42	1.57531
1376	50	22	sha	6	4.tif	0	0	40	1.46029
1377	50	22	sha	6	4.tif	0	0	38	1.42881
1378	50	22	sha	6	4.tif	0	0	36	1.21425
1379	50	22	sha	6	4.tif	0	0	34	1.24732
1380	50	22	sha	6	4.tif	0	0	32	1.2865
1381	50	22	sha	6	4.tif	0	0	30	1.26116
1382	50	22	sha	6	4.tif	0	0	28	1.16704
1383	50	22	sha	6	4.tif	0	0	26	1.13653
1384	50	22	sha	6	4.tif	0	0	24	0.928948
1385	50	22	sha	6	4.tif	0	0	22	1.12682
1386	50	22	sha	6	4.tif	0	0	20	1.07485
1387	50	22	sha	6	4.tif	0	0	18	1.21444
1388	50	22	sha	6	4.tif	0	0	16	0.764452
1389	50	22	sha	6	4.tif	0	0	14	0.704978
1390	50	22	sha	6	4.tif	0	0	12	0.801191
1391	50	22	sha	6	4.tif	0	0	10	0.851981
1392	50	22	sha	6	4.tif	0	0	8	0.89651
1393	50	22	sha	6	4.tif	0	0	6	0.910267
1394	50	22	sha	6	4.tif	0	0	4	0.949659
1395	50	22	sha	6	4.tif	0	0	2	0.994903
1396	50	22	sha	6	4.tif	0	0	1.27222e-13	0.849725
1397	50	22	sha	6	4.tif	0	0	2	0.566792
1398	50	22	sha	6	4.tif	0	0	4	0.64099
1399	50	22	sha	6	4.tif	0	0	6	0.640057
1400	50	22	sha	6	4.tif	0	0	8	0.582435
1401	50	22	sha	6	4.tif	0	0	10	0.521724
1402	50	22	sha	6	4.tif	0	0	12	0.587751
1403	50	22	sha	6	4.tif	0	0	14	0.518691
1404	50	22	sha	6	4.tif	0	0	16	0.515194
1405	50	22	sha	6	4.tif	0	0	18	0.517637
1406	50	22	sha	6	4.tif	0	0	20	0.52551
1407	50	22	sha	6	4.tif	0	0	22	0.555029
1408	50	22	sha	6	4.tif	0	0	24	0.658524
1409	50	22	sha	6	4.tif	0	0	26	0.739348
1410	50	22	sha	6	4.tif	0	0	28	0.631728
1411	50	22	sha	6	4.tif	0	0	30	0.762214
1412	50	22	sha	6	4.tif	0	0	32	0.877133
1413	50	22	sha	6	4.tif	0	0	34	0.941293
1414	50	22	sha	6	4.tif	0	0	36	1.10076
1415	50	22	sha	6	4.tif	0	0	38	1.00805
1416	50	22	sha	6	4.tif	0	0	40	1.28291
1417	50	22	sha	6	4.tif	0	0	42	1.28251
1418	50	22	sha	6	4.tif	0	0	44	1.22774
1419	50	22	sha	6	4.tif	0	0	46	1.52109
1420	50	22	sha	6	4.tif	0	0	48	1.57172
1421	50	22	sha	6	4.tif	0	0	50	2.34442
1422	50	22	sha	6	4.tif	0	0	52	2.36109
1423	50	22	sha	6	4.tif	0	0	54	1.69341
1424	50	22	sha	6	4.tif	0	0	56	1.46944
1425	50	22	sha	6	4.tif	0	0	58	1.45332
1426	50	22	sha	6	4.tif	0	0	60	1.42918
1427	50	22	sha	6	4.tif	0	0	62	1.33844
1428	50	22	sha	6	4.tif	0	0	64	1.51884
1429	50	22	sha	6	4.tif	0	0	66	1.69343
1430	50	22	sha	6	4.tif	0	0	68	1.21973
1431	50	22	sha	6	4.tif	0	0	70	1.10048
1432	50	22	sha	6	4.tif	0	0	72	1.33837
1433	50	22	sha	6	4.tif	0	0	74	1.05883
1434	50	22	sha	6	4.tif	0	0	76	0.927083
1435	50	22	sha	6	4.tif	0	0	78	0.898783
1436	50	22	sha	6	4.tif	0	0	80	0.766306
1437	50	22	sha	6	4.tif	0	0	82	0.870356
1438	50	22	sha	6	4.tif	0	0	84	1.00857
1439	50	22	sha	6	4.tif	0	0	86	0.907234
1440	50	22	sha	6	4.tif	0	0	88	0.745785
1441	50	22	sha	7	5.tif	0	0	90	0.945207
1442	50	22	sha	7	5.tif	0	0	88	0.956969
1443	50	22	sha	7	5.tif	0	0	86	1.1506
1444	50	22	sha	7	5.tif	0	0	84	1.12156
1445	50	22	sha	7	5.tif	0	0	82	0.840019
1446	50	22	sha	7	5.tif	0	0	80	0.888612
1447	50	22	sha	7	5.tif	0	0	78	0.962786
1448	50	22	sha	7	5.tif	0	0	76	0.950768
1449	50	22	sha	7	5.tif	0	0	74	1.02433
1450	50	22	sha	7	5.tif	0	0	72	1.12353
1451	50	22	sha	7	5.tif	0	0	70	1.28258
1452	50	22	sha	7	5.tif	0	0	68	1.36716
1453	50	22	sha	7	5.tif	0	0	66	1.75176
1454	50	22	sha	7	5.tif	0	0	64	1.71426
1455	50	22	sha	7	5.tif	0	0	62	1.69371
1456	50	22	sha	7	5.tif	0	0	60	1.97818
1457	50	22	sha	7	5.tif	0	0	58	1.91877
1458	50	22	sha	7	5.tif	0	0	56	1.83211
1459	50	22	sha	7	5.tif	0	0	54	2.47042
1460	50	22	sha	7	5.tif	0	0	52	2.32488
1461	50	22	sha	7	5.tif	0	0	50	2.00337
1462	50	22	sha	7	5.tif	0	0	48	1.86765
1463	50	22	sha	7	5.tif	0	0	46	1.32534
1464	50	22	sha	7	5.tif	0	0	44	1.60845
1465	50	22	sha	7	5.tif	0	0	42	1.47419
1466	50	22	sha	7	5.tif	0	0	40	1.25173
1467	50	22	sha	7	5.tif	0	0	38	1.19467
1468	50	22	sha	7	5.tif	0	0	36	1.26123
1469	50	22	sha	7	5.tif	0	0	34	1.24731
1470	50	22	sha	7	5.tif	0	0	32	1.25108
1471	50	22	sha	7	5.tif	0	0	30	1.26804
1472	50	22	sha	7	5.tif	0	0	28	1.19184
1473	50	22	sha	7	5.tif	0	0	26	1.0308
1474	50	22	sha	7	5.tif	0	0	24	0.834794
1475	50	22	sha	7	5.tif	0	0	22	0.759121
1476	50	22	sha	7	5.tif	0	0	20	0.777775
1477	50	22	sha	7	5.tif	0	0	18	0.834895
1478	50	22	sha	7	5.tif	0	0	16	0.87552
1479	50	22	sha	7	5.tif	0	0	14	0.823859
1480	50	22	sha	7	5.tif	0	0	12	0.886613
1481	50	22	sha	7	5.tif	0	0	10	0.903297
1482	50	22	sha	7	5.tif	0	0	8	0.929196
1483	50	22	sha	7	5.tif	0	0	6	0.807143
1484	50	22	sha	7	5.tif	0	0	4	0.738056
1485	50	22	sha	7	5.tif	0	0	2	0.858579
1486	50	22	sha	7	5.tif	0	0	1.27222e-13	0.831026
1487	50	22	sha	7	5.tif	0	0	2	0.700264
1488	50	22	sha	7	5.tif	0	0	4	0.579209
1489	50	22	sha	7	5.tif	0	0	6	0.54727
1490	50	22	sha	7	5.tif	0	0	8	0.662481
1491	50	22	sha	7	5.tif	0	0	10	0.769407
1492	50	22	sha	7	5.tif	0	0	12	0.764507
1493	50	22	sha	7	5.tif	0	0	14	0.680109
1494	50	22	sha	7	5.tif	0	0	16	0.537595
1495	50	22	sha	7	5.tif	0	0	18	0.658795
1496	50	22	sha	7	5.tif	0	0	20	0.60438
1497	50	22	sha	7	5.tif	0	0	22	0.608098
1498	50	22	sha	7	5.tif	0	0	24	0.75771
1499	50	22	sha	7	5.tif	0	0	26	0.801648
1500	50	22	sha	7	5.tif	0	0	28	0.912924
1501	50	22	sha	7	5.tif	0	0	30	1.09794
1502	50	22	sha	7	5.tif	0	0	32	1.04161
1503	50	22	sha	7	5.tif	0	0	34	1.17682
1504	50	22	sha	7	5.tif	0	0	36	1.03826
1505	50	22	sha	7	5.tif	0	0	38	0.876232
1506	50	22	sha	7	5.tif	0	0	40	1.1667
1507	50	22	sha	7	5.tif	0	0	42	1.25211
1508	50	22	sha	7	5.tif	0	0	44	1.0395
1509	50	22	sha	7	5.tif	0	0	46	1.41387
1510	50	22	sha	7	5.tif	0	0	48	1.27605
1511	50	22	sha	7	5.tif	0	0	50	1.06672
1512	50	22	sha	7	5.tif	0	0	52	0.986289
1513	50	22	sha	7	5.tif	0	0	54	1.0839
1514	50	22	sha	7	5.tif	0	0	56	1.19724
1515	50	22	sha	7	5.tif	0	0	58	1.28612
1516	50	22	sha	7	5.tif	0	0	60	1.15262
1517	50	22	sha	7	5.tif	0	0	62	1.34322
1518	50	22	sha	7	5.tif	0	0	64	1.36294
1519	50	22	sha	7	5.tif	0	0	66	1.27786
1520	50	22	sha	7	5.tif	0	0	68	1.39921
1521	50	22	sha	7	5.tif	0	0	70	1.40254
1522	50	22	sha	7	5.tif	0	0	72	1.22884
1523	50	22	sha	7	5.tif	0	0	74	1.18145
1524	50	22	sha	7	5.tif	0	0	76	0.921109
1525	50	22	sha	7	5.tif	0	0	78	0.898799
1526	50	22	sha	7	5.tif	0	0	80	0.956444
1527	50	22	sha	7	5.tif	0	0	82	0.784451
1528	50	22	sha	7	5.tif	0	0	84	0.823955
1529	50	22	sha	7	5.tif	0	0	86	0.79984
1530	50	22	sha	7	5.tif	0	0	88	0.749191
1531	59	22	bay	2	1.tif	0	0	90	0.567298
1532	59	22	bay	2	1.tif	0	0	88	0.43826
1533	59	22	bay	2	1.tif	0	0	86	0.524357
1534	59	22	bay	2	1.tif	0	0	84	0.62923
1535	59	22	bay	2	1.tif	0	0	82	0.527492
1536	59	22	bay	2	1.tif	0	0	80	0.446105
1537	59	22	bay	2	1.tif	0	0	78	0.406685
1538	59	22	bay	2	1.tif	0	0	76	0.439863
1539	59	22	bay	2	1.tif	0	0	74	0.484861
1540	59	22	bay	2	1.tif	0	0	72	0.546208
1541	59	22	bay	2	1.tif	0	0	70	0.575948
1542	59	22	bay	2	1.tif	0	0	68	0.617763
1543	59	22	bay	2	1.tif	0	0	66	0.736644
1544	59	22	bay	2	1.tif	0	0	64	0.743975
1545	59	22	bay	2	1.tif	0	0	62	0.75663
1546	59	22	bay	2	1.tif	0	0	60	0.974471
1547	59	22	bay	2	1.tif	0	0	58	0.966601
1548	59	22	bay	2	1.tif	0	0	56	1.05924
1549	59	22	bay	2	1.tif	0	0	54	1.10667
1550	59	22	bay	2	1.tif	0	0	52	1.23209
1551	59	22	bay	2	1.tif	0	0	50	1.22593
1552	59	22	bay	2	1.tif	0	0	48	1.15482
1553	59	22	bay	2	1.tif	0	0	46	1.24512
1554	59	22	bay	2	1.tif	0	0	44	1.34105
1555	59	22	bay	2	1.tif	0	0	42	1.4794
1556	59	22	bay	2	1.tif	0	0	40	1.74728
1557	59	22	bay	2	1.tif	0	0	38	1.59451
1558	59	22	bay	2	1.tif	0	0	36	1.69392
1559	59	22	bay	2	1.tif	0	0	34	1.70054
1560	59	22	bay	2	1.tif	0	0	32	1.68933
1561	59	22	bay	2	1.tif	0	0	30	1.74699
1562	59	22	bay	2	1.tif	0	0	28	1.5566
1563	59	22	bay	2	1.tif	0	0	26	1.33643
1564	59	22	bay	2	1.tif	0	0	24	1.44022
1565	59	22	bay	2	1.tif	0	0	22	1.4962
1566	59	22	bay	2	1.tif	0	0	20	1.23323
1567	59	22	bay	2	1.tif	0	0	18	1.29653
1568	59	22	bay	2	1.tif	0	0	16	1.1647
1569	59	22	bay	2	1.tif	0	0	14	1.18966
1570	59	22	bay	2	1.tif	0	0	12	1.37428
1571	59	22	bay	2	1.tif	0	0	10	1.53501
1572	59	22	bay	2	1.tif	0	0	8	1.55133
1573	59	22	bay	2	1.tif	0	0	6	1.48133
1574	59	22	bay	2	1.tif	0	0	4	1.47125
1575	59	22	bay	2	1.tif	0	0	2	1.3908
1576	59	22	bay	2	1.tif	0	0	1.27222e-13	1.69464
1577	59	22	bay	2	1.tif	0	0	2	1.25445
1578	59	22	bay	2	1.tif	0	0	4	1.15006
1579	59	22	bay	2	1.tif	0	0	6	1.1458
1580	59	22	bay	2	1.tif	0	0	8	1.22117
1581	59	22	bay	2	1.tif	0	0	10	1.39093
1582	59	22	bay	2	1.tif	0	0	12	1.191
1583	59	22	bay	2	1.tif	0	0	14	1.22722
1584	59	22	bay	2	1.tif	0	0	16	1.34914
1585	59	22	bay	2	1.tif	0	0	18	1.22494
1586	59	22	bay	2	1.tif	0	0	20	1.15094
1587	59	22	bay	2	1.tif	0	0	22	1.13945
1588	59	22	bay	2	1.tif	0	0	24	1.12142
1589	59	22	bay	2	1.tif	0	0	26	1.25238
1590	59	22	bay	2	1.tif	0	0	28	1.35536
1591	59	22	bay	2	1.tif	0	0	30	1.88729
1592	59	22	bay	2	1.tif	0	0	32	1.84995
1593	59	22	bay	2	1.tif	0	0	34	1.51581
1594	59	22	bay	2	1.tif	0	0	36	1.52574
1595	59	22	bay	2	1.tif	0	0	38	1.4549
1596	59	22	bay	2	1.tif	0	0	40	1.37504
1597	59	22	bay	2	1.tif	0	0	42	1.32389
1598	59	22	bay	2	1.tif	0	0	44	1.28673
1599	59	22	bay	2	1.tif	0	0	46	1.29051
1600	59	22	bay	2	1.tif	0	0	48	1.3502
1601	59	22	bay	2	1.tif	0	0	50	1.59543
1602	59	22	bay	2	1.tif	0	0	52	1.26314
1603	59	22	bay	2	1.tif	0	0	54	1.15649
1604	59	22	bay	2	1.tif	0	0	56	1.18378
1605	59	22	bay	2	1.tif	0	0	58	1.29807
1606	59	22	bay	2	1.tif	0	0	60	1.20894
1607	59	22	bay	2	1.tif	0	0	62	1.05215
1608	59	22	bay	2	1.tif	0	0	64	0.869483
1609	59	22	bay	2	1.tif	0	0	66	0.828255
1610	59	22	bay	2	1.tif	0	0	68	0.771612
1611	59	22	bay	2	1.tif	0	0	70	0.638515
1612	59	22	bay	2	1.tif	0	0	72	0.530586
1613	59	22	bay	2	1.tif	0	0	74	0.497311
1614	59	22	bay	2	1.tif	0	0	76	0.548377
1615	59	22	bay	2	1.tif	0	0	78	0.576235
1616	59	22	bay	2	1.tif	0	0	80	0.53883
1617	59	22	bay	2	1.tif	0	0	82	0.478452
1618	59	22	bay	2	1.tif	0	0	84	0.428869
1619	59	22	bay	2	1.tif	0	0	86	0.454034
1620	59	22	bay	2	1.tif	0	0	88	0.435579
1621	59	22	bay	3	1.tif	0	0	90	0.480925
1622	59	22	bay	3	1.tif	0	0	88	0.39038
1623	59	22	bay	3	1.tif	0	0	86	0.410787
1624	59	22	bay	3	1.tif	0	0	84	0.427641
1625	59	22	bay	3	1.tif	0	0	82	0.518776
1626	59	22	bay	3	1.tif	0	0	80	0.478596
1627	59	22	bay	3	1.tif	0	0	78	0.481415
1628	59	22	bay	3	1.tif	0	0	76	0.46765
1629	59	22	bay	3	1.tif	0	0	74	0.522267
1630	59	22	bay	3	1.tif	0	0	72	0.650856
1631	59	22	bay	3	1.tif	0	0	70	0.621683
1632	59	22	bay	3	1.tif	0	0	68	0.61786
1633	59	22	bay	3	1.tif	0	0	66	0.595178
1634	59	22	bay	3	1.tif	0	0	64	0.681349
1635	59	22	bay	3	1.tif	0	0	62	0.7587
1636	59	22	bay	3	1.tif	0	0	60	0.674896
1637	59	22	bay	3	1.tif	0	0	58	0.745015
1638	59	22	bay	3	1.tif	0	0	56	0.833677
1639	59	22	bay	3	1.tif	0	0	54	0.894608
1640	59	22	bay	3	1.tif	0	0	52	0.99222
1641	59	22	bay	3	1.tif	0	0	50	0.973513
1642	59	22	bay	3	1.tif	0	0	48	1.00715
1643	59	22	bay	3	1.tif	0	0	46	0.958219
1644	59	22	bay	3	1.tif	0	0	44	0.885413
1645	59	22	bay	3	1.tif	0	0	42	0.915967
1646	59	22	bay	3	1.tif	0	0	40	1.03603
1647	59	22	bay	3	1.tif	0	0	38	1.15919
1648	59	22	bay	3	1.tif	0	0	36	1.251
1649	59	22	bay	3	1.tif	0	0	34	1.26545
1650	59	22	bay	3	1.tif	0	0	32	1.20682
1651	59	22	bay	3	1.tif	0	0	30	1.14539
1652	59	22	bay	3	1.tif	0	0	28	1.24287
1653	59	22	bay	3	1.tif	0	0	26	1.14735
1654	59	22	bay	3	1.tif	0	0	24	1.10225
1655	59	22	bay	3	1.tif	0	0	22	1.25255
1656	59	22	bay	3	1.tif	0	0	20	1.29385
1657	59	22	bay	3	1.tif	0	0	18	1.36616
1658	59	22	bay	3	1.tif	0	0	16	1.32503
1659	59	22	bay	3	1.tif	0	0	14	1.39716
1660	59	22	bay	3	1.tif	0	0	12	1.26748
1661	59	22	bay	3	1.tif	0	0	10	1.20422
1662	59	22	bay	3	1.tif	0	0	8	1.31059
1663	59	22	bay	3	1.tif	0	0	6	1.52038
1664	59	22	bay	3	1.tif	0	0	4	1.72103
1665	59	22	bay	3	1.tif	0	0	2	1.61945
1666	59	22	bay	3	1.tif	0	0	1.27222e-13	1.72376
1667	59	22	bay	3	1.tif	0	0	2	1.48547
1668	59	22	bay	3	1.tif	0	0	4	1.57055
1669	59	22	bay	3	1.tif	0	0	6	1.50415
1670	59	22	bay	3	1.tif	0	0	8	1.46419
1671	59	22	bay	3	1.tif	0	0	10	1.58355
1672	59	22	bay	3	1.tif	0	0	12	1.45456
1673	59	22	bay	3	1.tif	0	0	14	1.40944
1674	59	22	bay	3	1.tif	0	0	16	1.59921
1675	59	22	bay	3	1.tif	0	0	18	1.93617
1676	59	22	bay	3	1.tif	0	0	20	1.95052
1677	59	22	bay	3	1.tif	0	0	22	1.9221
1678	59	22	bay	3	1.tif	0	0	24	1.54049
1679	59	22	bay	3	1.tif	0	0	26	1.53647
1680	59	22	bay	3	1.tif	0	0	28	1.56836
1681	59	22	bay	3	1.tif	0	0	30	1.46855
1682	59	22	bay	3	1.tif	0	0	32	1.63991
1683	59	22	bay	3	1.tif	0	0	34	1.92131
1684	59	22	bay	3	1.tif	0	0	36	1.87441
1685	59	22	bay	3	1.tif	0	0	38	1.79412
1686	59	22	bay	3	1.tif	0	0	40	1.86686
1687	59	22	bay	3	1.tif	0	0	42	1.78
1688	59	22	bay	3	1.tif	0	0	44	1.53495
1689	59	22	bay	3	1.tif	0	0	46	1.53979
1690	59	22	bay	3	1.tif	0	0	48	1.65103
1691	59	22	bay	3	1.tif	0	0	50	1.63219
1692	59	22	bay	3	1.tif	0	0	52	1.36156
1693	59	22	bay	3	1.tif	0	0	54	1.18974
1694	59	22	bay	3	1.tif	0	0	56	1.05183
1695	59	22	bay	3	1.tif	0	0	58	1.03333
1696	59	22	bay	3	1.tif	0	0	60	0.954014
1697	59	22	bay	3	1.tif	0	0	62	0.844698
1698	59	22	bay	3	1.tif	0	0	64	0.720511
1699	59	22	bay	3	1.tif	0	0	66	0.74551
1700	59	22	bay	3	1.tif	0	0	68	0.617494
1701	59	22	bay	3	1.tif	0	0	70	0.640447
1702	59	22	bay	3	1.tif	0	0	72	0.687012
1703	59	22	bay	3	1.tif	0	0	74	0.680804
1704	59	22	bay	3	1.tif	0	0	76	0.599834
1705	59	22	bay	3	1.tif	0	0	78	0.536538
1706	59	22	bay	3	1.tif	0	0	80	0.552294
1707	59	22	bay	3	1.tif	0	0	82	0.536212
1708	59	22	bay	3	1.tif	0	0	84	0.570117
1709	59	22	bay	3	1.tif	0	0	86	0.493497
1710	59	22	bay	3	1.tif	0	0	88	0.413476
1711	59	22	bay	4	1.tif	0	0	90	0.492103
1712	59	22	bay	4	1.tif	0	0	88	0.442806
1713	59	22	bay	4	1.tif	0	0	86	0.485272
1714	59	22	bay	4	1.tif	0	0	84	0.448736
1715	59	22	bay	4	1.tif	0	0	82	0.483353
1716	59	22	bay	4	1.tif	0	0	80	0.559293
1717	59	22	bay	4	1.tif	0	0	78	0.494949
1718	59	22	bay	4	1.tif	0	0	76	0.493703
1719	59	22	bay	4	1.tif	0	0	74	0.531567
1720	59	22	bay	4	1.tif	0	0	72	0.554978
1721	59	22	bay	4	1.tif	0	0	70	0.593325
1722	59	22	bay	4	1.tif	0	0	68	0.713937
1723	59	22	bay	4	1.tif	0	0	66	0.831624
1724	59	22	bay	4	1.tif	0	0	64	0.909217
1725	59	22	bay	4	1.tif	0	0	62	0.93849
1726	59	22	bay	4	1.tif	0	0	60	0.969435
1727	59	22	bay	4	1.tif	0	0	58	1.02525
1728	59	22	bay	4	1.tif	0	0	56	1.11455
1729	59	22	bay	4	1.tif	0	0	54	1.14776
1730	59	22	bay	4	1.tif	0	0	52	1.70097
1731	59	22	bay	4	1.tif	0	0	50	2.02149
1732	59	22	bay	4	1.tif	0	0	48	1.5286
1733	59	22	bay	4	1.tif	0	0	46	1.42098
1734	59	22	bay	4	1.tif	0	0	44	1.56008
1735	59	22	bay	4	1.tif	0	0	42	1.39777
1736	59	22	bay	4	1.tif	0	0	40	1.44055
1737	59	22	bay	4	1.tif	0	0	38	1.70658
1738	59	22	bay	4	1.tif	0	0	36	1.89339
1739	59	22	bay	4	1.tif	0	0	34	1.79685
1740	59	22	bay	4	1.tif	0	0	32	1.87061
1741	59	22	bay	4	1.tif	0	0	30	1.83388
1742	59	22	bay	4	1.tif	0	0	28	1.67665
1743	59	22	bay	4	1.tif	0	0	26	1.61504
1744	59	22	bay	4	1.tif	0	0	24	1.25798
1745	59	22	bay	4	1.tif	0	0	22	1.4548
1746	59	22	bay	4	1.tif	0	0	20	1.36033
1747	59	22	bay	4	1.tif	0	0	18	1.43744
1748	59	22	bay	4	1.tif	0	0	16	1.54757
1749	59	22	bay	4	1.tif	0	0	14	1.32212
1750	59	22	bay	4	1.tif	0	0	12	1.33314
1751	59	22	bay	4	1.tif	0	0	10	1.25738
1752	59	22	bay	4	1.tif	0	0	8	1.35351
1753	59	22	bay	4	1.tif	0	0	6	1.25616
1754	59	22	bay	4	1.tif	0	0	4	1.5421
1755	59	22	bay	4	1.tif	0	0	2	1.50062
1756	59	22	bay	4	1.tif	0	0	1.27222e-13	1.8198
1757	59	22	bay	4	1.tif	0	0	2	1.59465
1758	59	22	bay	4	1.tif	0	0	4	1.57574
1759	59	22	bay	4	1.tif	0	0	6	1.49342
1760	59	22	bay	4	1.tif	0	0	8	1.24172
1761	59	22	bay	4	1.tif	0	0	10	1.21395
1762	59	22	bay	4	1.tif	0	0	12	1.40575
1763	59	22	bay	4	1.tif	0	0	14	1.07644
1764	59	22	bay	4	1.tif	0	0	16	1.13787
1765	59	22	bay	4	1.tif	0	0	18	1.01076
1766	59	22	bay	4	1.tif	0	0	20	1.14474
1767	59	22	bay	4	1.tif	0	0	22	1.19097
1768	59	22	bay	4	1.tif	0	0	24	1.15719
1769	59	22	bay	4	1.tif	0	0	26	1.13463
1770	59	22	bay	4	1.tif	0	0	28	1.24019
1771	59	22	bay	4	1.tif	0	0	30	1.36102
1772	59	22	bay	4	1.tif	0	0	32	1.35132
1773	59	22	bay	4	1.tif	0	0	34	1.40635
1774	59	22	bay	4	1.tif	0	0	36	1.16377
1775	59	22	bay	4	1.tif	0	0	38	1.17021
1776	59	22	bay	4	1.tif	0	0	40	0.977746
1777	59	22	bay	4	1.tif	0	0	42	0.996462
1778	59	22	bay	4	1.tif	0	0	44	1.21578
1779	59	22	bay	4	1.tif	0	0	46	1.40152
1780	59	22	bay	4	1.tif	0	0	48	1.45392
1781	59	22	bay	4	1.tif	0	0	50	1.21347
1782	59	22	bay	4	1.tif	0	0	52	1.1924
1783	59	22	bay	4	1.tif	0	0	54	1.19882
1784	59	22	bay	4	1.tif	0	0	56	1.11996
1785	59	22	bay	4	1.tif	0	0	58	0.976119
1786	59	22	bay	4	1.tif	0	0	60	1.12594
1787	59	22	bay	4	1.tif	0	0	62	0.978219
1788	59	22	bay	4	1.tif	0	0	64	0.849308
1789	59	22	bay	4	1.tif	0	0	66	0.755163
1790	59	22	bay	4	1.tif	0	0	68	0.673578
1791	59	22	bay	4	1.tif	0	0	70	0.569467
1792	59	22	bay	4	1.tif	0	0	72	0.48759
1793	59	22	bay	4	1.tif	0	0	74	0.489669
1794	59	22	bay	4	1.tif	0	0	76	0.51592
1795	59	22	bay	4	1.tif	0	0	78	0.500282
1796	59	22	bay	4	1.tif	0	0	80	0.410744
1797	59	22	bay	4	1.tif	0	0	82	0.408047
1798	59	22	bay	4	1.tif	0	0	84	0.41849
1799	59	22	bay	4	1.tif	0	0	86	0.445524
1800	59	22	bay	4	1.tif	0	0	88	0.418401
1801	59	22	bay	5	1.tif	0	0	90	0.506939
1802	59	22	bay	5	1.tif	0	0	88	0.45186
1803	59	22	bay	5	1.tif	0	0	86	0.400085
1804	59	22	bay	5	1.tif	0	0	84	0.423616
1805	59	22	bay	5	1.tif	0	0	82	0.461542
1806	59	22	bay	5	1.tif	0	0	80	0.472142
1807	59	22	bay	5	1.tif	0	0	78	0.600876
1808	59	22	bay	5	1.tif	0	0	76	0.603923
1809	59	22	bay	5	1.tif	0	0	74	0.60688
1810	59	22	bay	5	1.tif	0	0	72	0.656767
1811	59	22	bay	5	1.tif	0	0	70	0.782876
1812	59	22	bay	5	1.tif	0	0	68	0.822493
1813	59	22	bay	5	1.tif	0	0	66	0.804723
1814	59	22	bay	5	1.tif	0	0	64	0.851516
1815	59	22	bay	5	1.tif	0	0	62	0.884475
1816	59	22	bay	5	1.tif	0	0	60	0.881204
1817	59	22	bay	5	1.tif	0	0	58	1.01533
1818	59	22	bay	5	1.tif	0	0	56	1.18909
1819	59	22	bay	5	1.tif	0	0	54	1.46224
1820	59	22	bay	5	1.tif	0	0	52	1.49986
1821	59	22	bay	5	1.tif	0	0	50	1.49586
1822	59	22	bay	5	1.tif	0	0	48	1.38272
1823	59	22	bay	5	1.tif	0	0	46	1.31447
1824	59	22	bay	5	1.tif	0	0	44	1.19727
1825	59	22	bay	5	1.tif	0	0	42	1.02988
1826	59	22	bay	5	1.tif	0	0	40	0.994495
1827	59	22	bay	5	1.tif	0	0	38	1.27627
1828	59	22	bay	5	1.tif	0	0	36	1.44767
1829	59	22	bay	5	1.tif	0	0	34	1.182
1830	59	22	bay	5	1.tif	0	0	32	1.09105
1831	59	22	bay	5	1.tif	0	0	30	1.26401
1832	59	22	bay	5	1.tif	0	0	28	1.17244
1833	59	22	bay	5	1.tif	0	0	26	1.08753
1834	59	22	bay	5	1.tif	0	0	24	0.996169
1835	59	22	bay	5	1.tif	0	0	22	1.30867
1836	59	22	bay	5	1.tif	0	0	20	1.08945
1837	59	22	bay	5	1.tif	0	0	18	1.11029
1838	59	22	bay	5	1.tif	0	0	16	0.933614
1839	59	22	bay	5	1.tif	0	0	14	0.887881
1840	59	22	bay	5	1.tif	0	0	12	0.949567
1841	59	22	bay	5	1.tif	0	0	10	0.851974
1842	59	22	bay	5	1.tif	0	0	8	1.13856
1843	59	22	bay	5	1.tif	0	0	6	1.33432
1844	59	22	bay	5	1.tif	0	0	4	1.22471
1845	59	22	bay	5	1.tif	0	0	2	1.34277
1846	59	22	bay	5	1.tif	0	0	1.27222e-13	1.70137
1847	59	22	bay	5	1.tif	0	0	2	2.01933
1848	59	22	bay	5	1.tif	0	0	4	2.78085
1849	59	22	bay	5	1.tif	0	0	6	1.86563
1850	59	22	bay	5	1.tif	0	0	8	1.30308
1851	59	22	bay	5	1.tif	0	0	10	1.33243
1852	59	22	bay	5	1.tif	0	0	12	1.34129
1853	59	22	bay	5	1.tif	0	0	14	1.26047
1854	59	22	bay	5	1.tif	0	0	16	1.21672
1855	59	22	bay	5	1.tif	0	0	18	1.34216
1856	59	22	bay	5	1.tif	0	0	20	1.48958
1857	59	22	bay	5	1.tif	0	0	22	1.97285
1858	59	22	bay	5	1.tif	0	0	24	1.87069
1859	59	22	bay	5	1.tif	0	0	26	1.38801
1860	59	22	bay	5	1.tif	0	0	28	1.39659
1861	59	22	bay	5	1.tif	0	0	30	1.47031
1862	59	22	bay	5	1.tif	0	0	32	1.61564
1863	59	22	bay	5	1.tif	0	0	34	1.64649
1864	59	22	bay	5	1.tif	0	0	36	1.60203
1865	59	22	bay	5	1.tif	0	0	38	1.85209
1866	59	22	bay	5	1.tif	0	0	40	1.89436
1867	59	22	bay	5	1.tif	0	0	42	1.59938
1868	59	22	bay	5	1.tif	0	0	44	1.38976
1869	59	22	bay	5	1.tif	0	0	46	1.2398
1870	59	22	bay	5	1.tif	0	0	48	1.25445
1871	59	22	bay	5	1.tif	0	0	50	1.17013
1872	59	22	bay	5	1.tif	0	0	52	1.3766
1873	59	22	bay	5	1.tif	0	0	54	1.33377
1874	59	22	bay	5	1.tif	0	0	56	1.07936
1875	59	22	bay	5	1.tif	0	0	58	1.07933
1876	59	22	bay	5	1.tif	0	0	60	0.999901
1877	59	22	bay	5	1.tif	0	0	62	1.00932
1878	59	22	bay	5	1.tif	0	0	64	0.831991
1879	59	22	bay	5	1.tif	0	0	66	0.6699
1880	59	22	bay	5	1.tif	0	0	68	0.660902
1881	59	22	bay	5	1.tif	0	0	70	0.662227
1882	59	22	bay	5	1.tif	0	0	72	0.693544
1883	59	22	bay	5	1.tif	0	0	74	0.625033
1884	59	22	bay	5	1.tif	0	0	76	0.550097
1885	59	22	bay	5	1.tif	0	0	78	0.487206
1886	59	22	bay	5	1.tif	0	0	80	0.47095
1887	59	22	bay	5	1.tif	0	0	82	0.491481
1888	59	22	bay	5	1.tif	0	0	84	0.531391
1889	59	22	bay	5	1.tif	0	0	86	0.486393
1890	59	22	bay	5	1.tif	0	0	88	0.463073
1891	59	22	bay	6	1.tif	0	0	90	0.433778
1892	59	22	bay	6	1.tif	0	0	88	0.367704
1893	59	22	bay	6	1.tif	0	0	86	0.404891
1894	59	22	bay	6	1.tif	0	0	84	0.421337
1895	59	22	bay	6	1.tif	0	0	82	0.409656
1896	59	22	bay	6	1.tif	0	0	80	0.501483
1897	59	22	bay	6	1.tif	0	0	78	0.532453
1898	59	22	bay	6	1.tif	0	0	76	0.509051
1899	59	22	bay	6	1.tif	0	0	74	0.482779
1900	59	22	bay	6	1.tif	0	0	72	0.493643
1901	59	22	bay	6	1.tif	0	0	70	0.513395
1902	59	22	bay	6	1.tif	0	0	68	0.574457
1903	59	22	bay	6	1.tif	0	0	66	0.531125
1904	59	22	bay	6	1.tif	0	0	64	0.621119
1905	59	22	bay	6	1.tif	0	0	62	0.6919
1906	59	22	bay	6	1.tif	0	0	60	0.703102
1907	59	22	bay	6	1.tif	0	0	58	0.819337
1908	59	22	bay	6	1.tif	0	0	56	0.835878
1909	59	22	bay	6	1.tif	0	0	54	0.800833
1910	59	22	bay	6	1.tif	0	0	52	0.83238
1911	59	22	bay	6	1.tif	0	0	50	0.946919
1912	59	22	bay	6	1.tif	0	0	48	0.939981
1913	59	22	bay	6	1.tif	0	0	46	1.0126
1914	59	22	bay	6	1.tif	0	0	44	1.17793
1915	59	22	bay	6	1.tif	0	0	42	1.28682
1916	59	22	bay	6	1.tif	0	0	40	1.25388
1917	59	22	bay	6	1.tif	0	0	38	1.02814
1918	59	22	bay	6	1.tif	0	0	36	1.30699
1919	59	22	bay	6	1.tif	0	0	34	1.28127
1920	59	22	bay	6	1.tif	0	0	32	1.27356
1921	59	22	bay	6	1.tif	0	0	30	1.30482
1922	59	22	bay	6	1.tif	0	0	28	1.23669
1923	59	22	bay	6	1.tif	0	0	26	1.58163
1924	59	22	bay	6	1.tif	0	0	24	1.38678
1925	59	22	bay	6	1.tif	0	0	22	1.35396
1926	59	22	bay	6	1.tif	0	0	20	1.28527
1927	59	22	bay	6	1.tif	0	0	18	1.24319
1928	59	22	bay	6	1.tif	0	0	16	1.20661
1929	59	22	bay	6	1.tif	0	0	14	1.65919
1930	59	22	bay	6	1.tif	0	0	12	1.92123
1931	59	22	bay	6	1.tif	0	0	10	2.3192
1932	59	22	bay	6	1.tif	0	0	8	2.52449
1933	59	22	bay	6	1.tif	0	0	6	2.50838
1934	59	22	bay	6	1.tif	0	0	4	2.39977
1935	59	22	bay	6	1.tif	0	0	2	2.37022
1936	59	22	bay	6	1.tif	0	0	1.27222e-13	2.36689
1937	59	22	bay	6	1.tif	0	0	2	1.80001
1938	59	22	bay	6	1.tif	0	0	4	1.50549
1939	59	22	bay	6	1.tif	0	0	6	1.48607
1940	59	22	bay	6	1.tif	0	0	8	1.50481
1941	59	22	bay	6	1.tif	0	0	10	1.54646
1942	59	22	bay	6	1.tif	0	0	12	1.79661
1943	59	22	bay	6	1.tif	0	0	14	1.60193
1944	59	22	bay	6	1.tif	0	0	16	1.83757
1945	59	22	bay	6	1.tif	0	0	18	2.22384
1946	59	22	bay	6	1.tif	0	0	20	2.41305
1947	59	22	bay	6	1.tif	0	0	22	2.38333
1948	59	22	bay	6	1.tif	0	0	24	1.95394
1949	59	22	bay	6	1.tif	0	0	26	1.48137
1950	59	22	bay	6	1.tif	0	0	28	1.59869
1951	59	22	bay	6	1.tif	0	0	30	1.76459
1952	59	22	bay	6	1.tif	0	0	32	1.70594
1953	59	22	bay	6	1.tif	0	0	34	1.39872
1954	59	22	bay	6	1.tif	0	0	36	1.18947
1955	59	22	bay	6	1.tif	0	0	38	1.32789
1956	59	22	bay	6	1.tif	0	0	40	1.11684
1957	59	22	bay	6	1.tif	0	0	42	1.09684
1958	59	22	bay	6	1.tif	0	0	44	1.07951
1959	59	22	bay	6	1.tif	0	0	46	1.06521
1960	59	22	bay	6	1.tif	0	0	48	1.12662
1961	59	22	bay	6	1.tif	0	0	50	0.921411
1962	59	22	bay	6	1.tif	0	0	52	0.87596
1963	59	22	bay	6	1.tif	0	0	54	0.642877
1964	59	22	bay	6	1.tif	0	0	56	0.594068
1965	59	22	bay	6	1.tif	0	0	58	0.585343
1966	59	22	bay	6	1.tif	0	0	60	0.526197
1967	59	22	bay	6	1.tif	0	0	62	0.557133
1968	59	22	bay	6	1.tif	0	0	64	0.516677
1969	59	22	bay	6	1.tif	0	0	66	0.523286
1970	59	22	bay	6	1.tif	0	0	68	0.468327
1971	59	22	bay	6	1.tif	0	0	70	0.433641
1972	59	22	bay	6	1.tif	0	0	72	0.454844
1973	59	22	bay	6	1.tif	0	0	74	0.432443
1974	59	22	bay	6	1.tif	0	0	76	0.390855
1975	59	22	bay	6	1.tif	0	0	78	0.398422
1976	59	22	bay	6	1.tif	0	0	80	0.407152
1977	59	22	bay	6	1.tif	0	0	82	0.37958
1978	59	22	bay	6	1.tif	0	0	84	0.417896
1979	59	22	bay	6	1.tif	0	0	86	0.41533
1980	59	22	bay	6	1.tif	0	0	88	0.397003
1981	59	22	col	1	1.tif	0	0	90	0.614273
1982	59	22	col	1	1.tif	0	0	88	0.580441
1983	59	22	col	1	1.tif	0	0	86	0.620993
1984	59	22	col	1	1.tif	0	0	84	0.689225
1985	59	22	col	1	1.tif	0	0	82	0.737188
1986	59	22	col	1	1.tif	0	0	80	0.622286
1987	59	22	col	1	1.tif	0	0	78	0.732683
1988	59	22	col	1	1.tif	0	0	76	0.839302
1989	59	22	col	1	1.tif	0	0	74	0.97979
1990	59	22	col	1	1.tif	0	0	72	1.04856
1991	59	22	col	1	1.tif	0	0	70	1.15897
1992	59	22	col	1	1.tif	0	0	68	1.29458
1993	59	22	col	1	1.tif	0	0	66	1.21113
1994	59	22	col	1	1.tif	0	0	64	1.14481
1995	59	22	col	1	1.tif	0	0	62	1.0314
1996	59	22	col	1	1.tif	0	0	60	1.12389
1997	59	22	col	1	1.tif	0	0	58	1.58635
1998	59	22	col	1	1.tif	0	0	56	1.79421
1999	59	22	col	1	1.tif	0	0	54	1.45559
[truncated: 971 more rows]

## Sheet: Figure 3E
	experiment	das	accession	plant	aq	area	convexhull	depth	width	circularity	ar	round	solidity	feret	feret_angle	massX	massY	shoot_area
1	50	22	bay	1	1.tif	7.18356	114.995	22.482	8.44156	0.522809	2.67713	0.373535	0.996302	22.5349	86.0712	0	10.0375	2.71
2	50	22	bay	2	2.tif	6.40709	99.0036	22.3232	7.66234	0.469981	2.87044	0.348379	0.995869	22.3817	85.8591	0	9.52454	3.06
3	50	22	bay	3	3.tif	6.89809	104.475	19.6392	8.31169	0.605799	2.2324	0.447949	0.996291	19.6465	88.4428	0	9.02901	2.69
4	50	22	bay	4	1.tif	6.83187	74.9882	17.3449	7.61905	0.546252	2.33413	0.428425	0.995339	17.3481	91.0962	0	7.90486	2.1
5	50	22	bay	5	2.tif	8.90871	80.3225	17.7633	6.69553	0.572573	2.7954	0.357731	0.995963	17.7904	93.1618	0	8.84769	2.85
6	50	22	bay	6	3.tif	5.89028	90.2744	23.1746	6.36364	0.419376	3.51464	0.284524	0.995424	23.1781	90.9988	0	9.6059	2.74
7	50	22	bay	7	1.tif	7.48445	126.348	22.4675	10.1587	0.546852	2.30333	0.434155	0.996503	22.4929	87.2789	0	9.66083	2.14
8	50	22	col	2	4.tif	7.65873	88.9541	15.2525	9.30736	0.735506	1.57906	0.633289	0.996273	15.2568	91.3549	0	7.05626	3.04
9	50	22	col	3	3.tif	7.03094	118.24	17.7201	11.5152	0.6975	1.61205	0.620327	0.996761	17.7464	93.123	0	8.09462	3.2
10	50	22	col	4	2.tif	6.76108	90.5058	13.189	10.5916	0.803947	1.2119	0.825151	0.996553	13.2277	85.6205	0	5.96999	2.7
11	50	22	col	5	1.tif	6.89309	82.158	13.3766	9.45166	0.786843	1.44822	0.690502	0.996459	13.4001	86.6046	0	6.4752	2.55
12	50	22	sha	2	1.tif	9.27123	158.857	21.1255	11.9625	0.663144	1.77487	0.563422	0.997184	21.2219	84.5375	0	8.85194	2.13
13	50	22	sha	3	1.tif	8.58201	145.127	19.9134	11.9625	0.66485	1.62192	0.616554	0.997303	20.0468	96.6135	0	8.2826	2.86
14	50	22	sha	4	2.tif	7.44364	116.675	17.316	11.9625	0.668961	1.4836	0.674035	0.99697	17.3967	84.4786	0	7.03317	2.47
15	50	22	sha	5	3.tif	6.96889	127.479	20.4618	11.4719	0.595932	1.78886	0.559017	0.996466	20.4638	90.8081	0	8.53206	3.9
16	50	22	sha	6	4.tif	8.03395	140.268	19.3074	11.9625	0.665024	1.60195	0.624239	0.997156	19.3164	88.2448	0	7.83371	3.2
17	50	22	sha	7	5.tif	9.3412	153.87	20.6205	11.9625	0.669587	1.65709	0.603468	0.997508	20.6481	92.9644	0	8.4591	3.09
18	59	22	bay	2	1.tif	8.81355	147.342	24.5022	10.404	0.547935	2.34279	0.426841	0.996831	24.6093	84.6504	0	11.6753	3.49
19	59	22	bay	3	1.tif	10.1853	104.283	20.0144	9.17749	0.577603	2.16725	0.461414	0.996072	20.0452	86.8225	0	9.6745	4.74
20	59	22	bay	4	1.tif	9.84198	91.4661	21.7172	7.48918	0.46442	2.90187	0.344606	0.995583	21.7534	93.3084	0	10.0893	4.2
21	59	22	bay	5	1.tif	12.277	168.663	25.0938	11.6162	0.566563	2.26056	0.442368	0.997118	25.1266	87.0702	0	11.1299	4.01
22	59	22	bay	6	1.tif	8.36545	120.382	25.8153	7.96537	0.440005	3.54875	0.28179	0.99612	25.8174	89.2634	0	12.0456	4.38
23	59	22	col	1	1.tif	8.93661	99.7258	15.3102	10.7504	0.76664	1.39001	0.719422	0.996582	15.3293	92.8597	0	7.19997	2.45
24	59	22	col	3	1.tif	6.31756	59.6797	13.4343	7.70563	0.678257	1.67991	0.59527	0.995077	13.4344	90.1231	0	6.44873	1.85
25	59	22	col	4	1.tif	7.66665	105.009	14.6753	10.1732	0.824678	1.39694	0.715852	0.997072	14.7504	84.2169	0	7.0886	3.18
26	59	22	col	5	1.tif	8.70819	108.461	16.5368	9.69697	0.772242	1.56821	0.63767	0.996691	16.5781	85.957	0	8.25204	3.89
27	59	22	col	6	1.tif	6.56597	101.808	16.6811	10.0577	0.722106	1.60266	0.623963	0.996508	16.6986	87.375	0	7.84101	2.82
28	59	22	sha	1	1.tif	7.11464	105.428	18.5137	10.5195	0.61645	1.85006	0.540522	0.996186	18.5744	94.6343	0	8.10453	2.26
29	59	22	sha	2	1.tif	9.05988	187.365	22.8427	11.9625	0.704105	1.75584	0.569529	0.998045	22.9161	94.5869	0	9.78262	3.73
30	59	22	sha	3	1.tif	7.97815	154.393	21.6739	11.9625	0.649959	1.78201	0.561165	0.997261	21.6988	92.7444	0	9.19311	4.83
31	59	22	sha	4	1.tif	8.39731	159.163	21.746	11.9625	0.682425	1.7438	0.573461	0.997376	21.8172	94.6283	0	10.0891	2.82
32	59	22	sha	5	1.tif	9.13297	181.861	22.4098	11.9625	0.690146	1.72728	0.578947	0.997932	22.4483	86.6465	0	9.46597	4.14
33	59	22	sha	6	1.tif	6.90392	118.868	17.7345	10.5628	0.712365	1.65381	0.604665	0.996833	17.886	82.5367	0	7.76874	3.64

## Sheet: Figure 3F, G
image	coord_x0	coord_y0	coord_x1	coord_y1	coord_x2	coord_y2	coord_x3	coord_y3	coord_x4	coord_y4	coord_x5	coord_y5	coord_x6	coord_y6	coord_x7	coord_y7	coord_x8	coord_y8	coord_x9	coord_y9	coord_x10	coord_y10	coord_x11	coord_y11	coord_x12	coord_y12	coord_x13	coord_y13	coord_x14	coord_y14	coord_x15	coord_y15	coord_x16	coord_y16	coord_x17	coord_y17	coord_x18	coord_y18	coord_x19	coord_y19	coord_x20	coord_y20	coord_x21	coord_y21	coord_x22	coord_y22	coord_x23	coord_y23	coord_x24
50-22-bay-1-1.tif272.0	0	248	81.3158	151	162.632	131	243.947	95	325.263	52	406.579	21	487.895	49	569.211	106	650.526	162	731.842	102	813.158	125	894.474	174	975.789	227	1057.11	241	1138.42	249	1219.74	245	1301.05	223	1382.37	210	1463.68	230	1529.55	237	1529.55	227	1463.68	229	1382.37	313	1301.05	336	1219.74
50-22-bay-2-2.tif179.0	0	204	78.7895	123	157.579	42	236.368	59	315.158	6	393.947	19	472.737	39	551.526	45	630.316	49	709.105	101	787.895	128	866.684	119	945.474	100	1024.26	96	1103.05	108	1181.84	126	1260.63	110	1339.42	117	1418.21	128	1482.03	133	1482.03	128	1418.21	181	1339.42	159	1260.63	220	1181.84
50-22-bay-3-3.tif264.0	0	195	70.1053	91	140.211	11	210.316	118	280.421	66	350.526	92	420.632	5	490.737	4	560.842	2	630.947	95	701.053	75	771.158	138	841.263	223	911.368	228	981.474	190	1051.58	262	1121.68	242	1191.79	271	1261.89	270	1318.68	277	1318.68	281	1261.89	322	1191.79	318	1121.68	395	1051.58
50-22-bay-4-1.tif201.0	0	148	63.1579	180	126.316	165	189.474	158	252.632	149	315.789	91	378.947	57	442.105	0	505.263	187	568.421	184	631.579	157	694.737	161	757.895	256	821.053	312	884.211	0	947.368	0	1010.53	210	1073.68	0	1136.84	274	1188	275	1188	528	1136.84	215	1073.68	528	1010.53	528	947.368
50-22-bay-6-3.tif183.0	0	88	81.2105	78	162.421	62	243.632	57	324.842	30	406.053	14	487.263	45	568.474	93	649.684	89	730.895	276	812.105	116	893.316	283	974.526	259	1055.74	187	1136.95	200	1218.16	0	1299.37	0	1380.58	222	1461.79	215	1527.57	220	1527.57	230	1461.79	424	1380.58	424	1299.37	224	1218.16
50-22-bay-7-1.tif336.0	0	253	81.2632	224	162.526	116	243.789	130	325.053	78	406.316	8	487.579	96	568.842	63	650.105	181	731.368	286	812.632	147	893.895	148	975.158	284	1056.42	266	1137.68	272	1218.95	226	1300.21	269	1381.47	270	1462.74	293	1528.56	295	1528.56	285	1462.74	275	1381.47	291	1300.21	279	1218.95
50-22-col-2-4.tif315.0	0	259	54.4211	138	108.842	148	163.263	137	217.684	98	272.105	51	326.526	88	380.947	1	435.368	114	489.789	92	544.211	70	598.632	197	653.053	321	707.474	199	761.895	250	816.316	260	870.737	287	925.158	299	979.579	316	1023.66	324	1023.66	316	979.579	309	925.158	434	870.737	381	816.316
50-22-col-3-3.tif372.0	0	332	62.1579	264	124.316	188	186.474	153	248.632	90	310.789	12	372.947	119	435.105	107	497.263	91	559.421	278	621.579	188	683.737	237	745.895	234	808.053	251	870.211	357	932.368	377	994.526	410	1056.68	410	1118.84	411	1169.19	416	1169.19	416	1118.84	415	1056.68	433	994.526	476	932.368
50-22-col-4-2.tif283.0	0	283	46.8947	202	93.7895	98	140.684	125	187.579	120	234.474	57	281.368	40	328.263	31	375.158	113	422.053	77	468.947	56	515.842	36	562.737	89	609.632	115	656.526	147	703.421	221	750.316	202	797.211	250	844.105	251	882.09	284	882.09	257	844.105	264	797.211	289	750.316	329	703.421
50-22-col-5-1.tif335.0	0	270	48.1053	168	96.2105	192	144.316	190	192.421	132	240.526	97	288.632	127	336.737	102	384.842	35	432.947	0	481.053	112	529.158	65	577.263	48	625.368	261	673.474	234	721.579	295	769.684	335	817.789	339	865.895	338	904.86	345	904.86	369	865.895	461	817.789	460	769.684	478	721.579
50-22-sha-2-1.tif387.0	0	274	76.3684	167	152.737	179	229.105	47	305.474	0	381.842	104	458.211	94	534.579	49	610.947	269	687.316	303	763.684	362	840.053	362	916.421	323	992.789	346	1069.16	366	1145.53	357	1221.89	341	1298.26	296	1374.63	326	1436.49	333	1436.49	376	1374.63	359	1298.26	362	1221.89	371	1145.53
50-22-sha-3-1.tif436.0	0	375	71.9474	208	143.895	81	215.842	68	287.789	122	359.737	0	431.684	126	503.632	273	575.579	343	647.526	414	719.474	453	791.421	403	863.368	477	935.316	383	1007.26	530	1079.21	553	1151.16	578	1223.11	586	1295.05	572	1353.33	584	1353.33	596	1295.05	589	1223.11	564	1151.16	543	1079.21
50-22-sha-4-2.tif391.0	0	236	63.6842	181	127.368	106	191.053	95	254.737	12	318.421	0	382.105	128	445.789	80	509.474	313	573.158	117	636.842	327	700.526	343	764.211	337	827.895	353	891.579	355	955.263	355	1018.95	244	1082.63	274	1146.32	314	1197.9	315	1197.9	377	1146.32	369	1082.63	361	1018.95	361	955.263
50-22-sha-5-3.tif422.0	0	427	53.7895	291	107.579	200	161.368	150	215.158	213	268.947	93	322.737	149	376.526	77	430.316	129	484.105	169	537.895	146	591.684	147	645.474	248	699.263	347	753.053	392	806.842	381	860.632	441	914.421	450	968.211	447	1011.78	449	1011.78	451	968.211	452	914.421	495	860.632	468	806.842
50-22-sha-6-4.tif421.0	0	288	69.6842	157	139.368	132	209.053	191	278.737	119	348.421	55	418.105	104	487.789	255	557.474	269	627.158	292	696.842	382	766.526	365	836.211	387	905.895	401	975.579	428	1045.26	425	1114.95	425	1184.63	421	1254.32	421	1310.76	423	1310.76	428	1254.32	427	1184.63	430	1114.95	434	1045.26
50-22-sha-7-5.tif394.0	0	254	74.5263	113	149.053	139	223.579	20	298.105	93	372.632	78	447.158	1	521.684	130	596.211	170	670.737	287	745.263	368	819.789	382	894.316	262	968.842	400	1043.37	453	1117.89	486	1192.42	373	1266.95	481	1341.47	463	1401.84	472	1401.84	492	1341.47	485	1266.95	495	1192.42	485	1117.89
59-22-bay-2-1.tif285.0	0	270	88.3684	230	176.737	194	265.105	161	353.474	113	441.842	134	530.211	59	618.579	97	706.947	37	795.316	128	883.684	115	972.053	188	1060.42	201	1148.79	211	1237.16	266	1325.53	276	1413.89	243	1502.26	200	1590.63	184	1662.21	193	1662.21	216	1590.63	273	1502.26	290	1413.89	294	1325.53
59-22-bay-3-1.tif322.0	0.01443	298	72.6316	253	145.263	203	217.895	157	290.526	92	363.158	56	435.789	29	508.421	4	581.053	119	653.684	128	726.316	111	798.947	103	871.579	131	944.211	187	1016.84	214	1089.47	229	1162.11	227	1234.74	272	1307.37	285	1366.2	286	1366.2	305	1307.37	350	1234.74	409	1162.11	451	1089.47
59-22-bay-4-1.tif179.0	0	140	78.5263	120	157.053	114	235.579	86	314.105	105	392.632	80	471.158	49	549.684	43	628.211	2	706.737	17	785.263	59	863.789	150	942.316	116	1020.84	147	1099.37	172	1177.89	196	1256.42	231	1334.95	266	1413.47	281	1477.08	291	1477.08	303	1413.47	330	1334.95	352	1256.42	375	1177.89
59-22-bay-6-1.tif190.0	0	176	92.1579	87	184.316	90	276.474	84	368.632	91	460.789	17	552.947	128	645.105	125	737.263	103	829.421	176	921.579	121	1013.74	183	1105.89	200	1198.05	211	1290.21	223	1382.37	232	1474.53	226	1566.68	218	1658.84	219	1733.49	229	1733.49	230	1658.84	290	1566.68	243	1474.53	354	1382.37
59-22-col-1-1.tif357.0	0	257	55.1579	188	110.316	220	165.474	178	220.632	143	275.789	114	330.947	99	386.105	28	441.263	0	496.421	118	551.579	69	606.737	69	661.895	234	717.053	253	772.211	297	827.368	366	882.526	346	937.684	384	992.842	394	1037.52	402	1037.52	401	992.842	396	937.684	407	882.526	443	827.368
59-22-col-3-1.tif248.0	0.01443	222	47.6316	193	95.2632	179	142.895	121	190.526	66	238.158	42	285.789	29	333.421	0	381.053	36	428.684	105	476.316	96	523.947	46	571.579	211	619.211	87	666.842	236	714.474	257	762.105	270	809.737	0	857.368	259	895.95	260	895.95	525	857.368	298	809.737	268	762.105	358	714.474
59-22-col-4-1.tif282.0	0	205	52.4211	98	104.842	26	157.263	73	209.684	40	262.105	15	314.526	62	366.947	37	419.368	70	471.789	67	524.211	57	576.632	35	629.053	23	681.474	1	733.895	182	786.316	217	838.737	192	891.158	266	943.579	270	986.04	274	986.04	273	943.579	273	891.158	359	838.737	375	786.316
59-22-col-5-1.tif335.0	0	286	59.2632	262	118.526	208	177.789	187	237.053	90	296.316	88	355.579	0	414.842	119	474.105	52	533.368	4	592.632	91	651.895	34	711.158	109	770.421	150	829.684	197	888.947	226	948.211	300	1007.47	0	1066.74	289	1114.74	292	1114.74	652	1066.74	311	1007.47	369	948.211	381	888.947
59-22-col-6-1.tif325.0	0	315	60.1579	256	120.316	136	180.474	95	240.632	53	300.789	90	360.947	82	421.105	28	481.263	3	541.421	218	601.579	217	661.737	180	721.895	137	782.053	216	842.211	274	902.368	274	962.526	307	1022.68	297	1082.84	299	1131.57	302	1131.57	303	1082.84	321	1022.68	333	962.526	340	902.368
59-22-sha-1-1.tif307.0	0	219	67.1053	145	134.211	28	201.316	41	268.421	151	335.526	92	402.632	104	469.737	198	536.842	125	603.947	206	671.053	301	738.158	312	805.263	286	872.368	298	939.474	325	1006.58	348	1073.68	379	1140.79	402	1207.89	416	1262.25	427	1262.25	432	1207.89	396	1140.79	493	1073.68	346	1006.58
59-22-sha-2-1.tif379.0	0	264	82.0526	241	164.105	115	246.158	45	328.211	37	410.263	5	492.316	0	574.368	53	656.421	11	738.474	341	820.526	417	902.579	433	984.632	475	1066.68	498	1148.74	505	1230.79	540	1312.84	549	1394.89	549	1476.95	543	1543.41	550	1543.41	559	1476.95	619	1394.89	552	1312.84	526	1230.79
59-22-sha-3-1.tif397.0	0	340	78.3158	241	156.632	153	234.947	42	313.263	0	391.579	150	469.895	88	548.211	73	626.526	97	704.842	199	783.158	262	861.474	357	939.789	380	1018.11	391	1096.42	407	1174.74	435	1253.05	447	1331.37	460	1409.68	465	1473.12	474	1473.12	502	1409.68	465	1331.37	445	1253.05	446	1174.74
59-22-sha-4-1.tif405.0	0	378	78.6316	231	157.263	180	235.895	99	314.526	39	393.158	9	471.789	9	550.421	0	629.053	158	707.684	249	786.316	188	864.947	168	943.579	431	1022.21	254	1100.84	405	1179.47	475	1258.11	473	1336.74	471	1415.37	460	1479.06	510	1479.06	482	1415.37	486	1336.74	513	1258.11	507	1179.47
59-22-sha-5-1.tif382.0	0	321	81.0526	124	162.105	93	243.158	47	324.211	5	405.263	52	486.316	0	567.368	8	648.421	24	729.474	258	810.526	264	891.579	414	972.632	172	1053.68	413	1134.74	406	1215.79	447	1296.84	441	1377.89	403	1458.95	394	1524.6	403	1524.6	431	1458.95	459	1377.89	463	1296.84	495	1215.79
59-22-sha-6-1.tif300.0	0	268	64	202	128	94	192	26	256	74	320	65	384	24	448	1	512	19	576	15	640	53	704	170	768	238	832	214	896	224	960	219	1024	237	1088	228	1152	227	1203.84	234	1203.84	236	1152	261	1088	254	1024	306	960
[truncated: 72 more columns]
