# Supplementary material for: GLO-Roots: an imaging platform enabling multidimensional characterization of soil-grown root systems
Source: eLife. 2015 Aug 19;4:e07597. doi: 10.7554/eLife.07597 (PMC4589753; doi:10.7554/eLife.07597)
Supplement: Figure 4—source data 1. — DOI: http://dx.doi.org/10.7554/eLife.07597.026 [file elife07597s011.xlsx]

## Sheet: figure_4G_reporter.csv
	image	rep_id	intensity	intensity_ratio	diameter	rep_x	rep_y	growth	growth.x	growth.y	depth	width	6
1	57-ZAT12-5-R24-SR1-FLT542-C-AQ1.tif	9e79d30f-c415-4511-8bb5-b48248cb11d9	6.28421	1.94137	21.095	827	352	0	0	0	2.53968	5.99275	6
2	57-ZAT12-5-R24-SR1-FLT542-C-AQ1.tif	e820d8e6-8737-42e9-a55d-fe592847174c	6.5534	2.2637	18.2483	716	390	0	0	0	2.81385	5.18841	6
3	57-ZAT12-5-R24-SR1-FLT542-C-AQ1.tif	af6d32aa-72be-4099-b63e-d4b18363e196	12.6667	3.1339	16.6433	703	407	0	0	0	2.93651	5.0942	6
4	57-ZAT12-5-R24-SR1-FLT542-C-AQ1.tif	8a162c01-57f0-4dd0-b354-8bb8f7067bf4	5.42718	1.71199	29.4109	660	446	0	0	0	3.21789	4.78261	6
5	57-ZAT12-5-R24-SR1-FLT542-C-AQ1.tif	9a4fcea5-4c30-47a7-90b4-736cb1df79a7	6.18563	1.96612	30.4631	1505	459	0	0	0	3.31169	10.9058	6
6	57-ZAT12-5-R24-SR1-FLT542-C-AQ1.tif	797873a4-41f3-444c-aeb1-40193f4134b7	7.39362	1.84317	15.5242	701	516	0	0	0	3.72294	5.07971	6
7	57-ZAT12-5-R24-SR1-FLT542-C-AQ1.tif	6d3a6313-9550-4e6a-94d3-2bf5bda418a5	7.51546	2.49726	26.9258	849	536	0	0	0	3.86724	6.15217	6
8	57-ZAT12-5-R24-SR1-FLT542-C-AQ1.tif	34afcc93-fef2-4b39-8245-26905f9c61b0	5.84043	1.93989	25.5539	675	571	0	0	0	4.11977	4.8913	6
9	57-ZAT12-5-R24-SR1-FLT542-C-AQ1.tif	48b3fcd8-564e-4c8a-a2bd-bf2378f7f418	5.79464	1.94453	28.4253	854	583	0	0	0	4.20635	6.18841	6
10	57-ZAT12-5-R24-SR1-FLT542-C-AQ1.tif	f7a025ad-6349-49de-aba3-0208cef51d72	6.28485	2.13211	31.8277	1126	589	0	0	0	4.24964	8.15942	6
11	57-ZAT12-5-R24-SR1-FLT542-C-AQ1.tif	5295d18b-0386-440b-b844-163e96108384	7.84685	2.47953	39.0512	668	605	0	0	0	4.36508	4.84058	6
12	57-ZAT12-5-R24-SR1-FLT542-C-AQ1.tif	add59e69-01b6-4476-984f-5ce0b746d8cd	6.32394	2.16258	45.5412	1399	616	0	0	0	4.44444	10.1377	6
13	57-ZAT12-5-R24-SR1-FLT542-C-AQ1.tif	1fad13c4-10c0-4626-93b7-c0ad5a92b3a7	8.23913	2.04485	22.2036	1097	609	0	0	0	4.39394	7.94928	6
14	57-ZAT12-5-R24-SR1-FLT542-C-AQ1.tif	70fc0e3b-3945-4db0-9c9d-51cf42eba99e	6.41916	2.28825	30.4631	437	612	0	0	0	4.41558	3.16667	6
15	57-ZAT12-5-R24-SR1-FLT542-C-AQ1.tif	27859bfb-fabe-4e6c-b7b4-a4a6e550277e	9.52336	2.65064	19.2354	487	621	0	0	0	4.48052	3.52899	6
16	57-ZAT12-5-R24-SR1-FLT542-C-AQ1.tif	50e16d59-143f-45c9-923e-f0defbdf1fd1	6.66825	2.06681	50	669	637	0	0	0	4.59596	4.84783	6
17	57-ZAT12-5-R24-SR1-FLT542-C-AQ1.tif	257ee218-9600-40fb-a0f1-130ecd082253	6.90494	2.06333	57.7235	1327	672	0	0	0	4.84848	9.61594	6
18	57-ZAT12-5-R24-SR1-FLT542-C-AQ1.tif	7a6d3a6b-3aab-4503-bf90-20fee9671f8d	6.52778	2.13759	28.178	717	657	0	0	0	4.74026	5.19565	6
19	57-ZAT12-5-R24-SR1-FLT542-C-AQ1.tif	ff70ca6f-8947-4163-9570-5efafecfb9ba	6.0274	1.92159	34.8281	565	662	0	0	0	4.77633	4.0942	6
20	57-ZAT12-5-R24-SR1-FLT542-C-AQ1.tif	f4748778-54a1-4a72-a07b-dfa3f4d571a5	6.24456	2.15579	42.4264	1381	674	0	0	0	4.86291	10.0072	6
21	57-ZAT12-5-R24-SR1-FLT542-C-AQ1.tif	13d7d707-925a-4bda-87d6-2b3a69b76ed7	7.69159	2.28554	18.2483	392	715	0	0	0	5.15873	2.84058	6
22	57-ZAT12-5-R24-SR1-FLT542-C-AQ1.tif	5d4fc7ef-2ce0-40e4-833a-a752a1ab8ffe	7.02525	2.38174	29.7321	1522	745	0	0	0	5.37518	11.029	6
23	57-ZAT12-5-R24-SR1-FLT542-C-AQ1.tif	44e350d9-e591-41c3-8a77-7611027519ae	7.5082	2.1048	25.4558	528	752	0	0	0	5.42569	3.82609	6
24	57-ZAT12-5-R24-SR1-FLT542-C-AQ1.tif	3f7b5595-83ee-4c1d-be66-8a448cf9c68c	6.31293	2.17349	25.9615	1380	759	0	0	0	5.47619	10	6
25	57-ZAT12-5-R24-SR1-FLT542-C-AQ1.tif	75318833-986a-4f3f-8ae9-30d58b5e8aad	6.39	2.24726	25.9615	699	767	0	0	0	5.53391	5.06522	6
26	57-ZAT12-5-R24-SR1-FLT542-C-AQ1.tif	3fec6490-cb1a-4274-8226-1cb8b4662615	13.8762	2.6232	31.7805	1093	763	0	0	0	5.50505	7.92029	6
27	57-ZAT12-5-R24-SR1-FLT542-C-AQ1.tif	aacf77e2-14e9-4425-92e3-7e4310f911e9	8.89583	2.55738	27.313	1277	776	0	0	0	5.59885	9.25362	6
28	57-ZAT12-5-R24-SR1-FLT542-C-AQ1.tif	1db6f280-2019-44da-8dbd-351fde442f9d	8.93389	2.22109	20.2237	381	805	0	0	0	5.80808	2.76087	6
29	57-ZAT12-5-R24-SR1-FLT542-C-AQ1.tif	a7875ab5-d63b-497b-857e-2c5f6b26c74d	5.56863	1.95246	22.1359	784	837	0	0	0	6.03896	5.68116	6
30	57-ZAT12-5-R24-SR1-FLT542-C-AQ1.tif	e7318c90-de6c-41c5-99e2-cda332dd334d	7.16	2.11844	30.4138	908	852	0	0	0	6.14719	6.57971	6
31	57-ZAT12-5-R24-SR1-FLT542-C-AQ1.tif	d681401f-cbe1-45fd-bcff-ad7fff3a5060	6.67273	2.22071	20.3961	462	852	0	0	0	6.14719	3.34783	6
32	57-ZAT12-5-R24-SR1-FLT542-C-AQ1.tif	c4ddcf26-78d3-49a6-b53e-cf352afda6dc	8.78947	2.34431	25.02	591	862	0	0	0	6.21934	4.28261	6
33	57-ZAT12-5-R24-SR1-FLT542-C-AQ1.tif	8604364a-b658-4f8e-bacc-2fe02cc4c265	8.84375	2.43227	17.1172	627	871	0	0	0	6.28427	4.54348	6
34	57-ZAT12-5-R24-SR1-FLT542-C-AQ1.tif	e0f101f2-3636-4a68-892d-e849067b2aa4	6.57724	2.17429	26.5707	545	902	0	0	0	6.50794	3.94928	6
35	57-ZAT12-5-R24-SR1-FLT542-C-AQ1.tif	f8ff8d76-832f-4650-ac03-b7b01faa4692	12.0367	2.66616	18.7883	1454	903	0	0	0	6.51515	10.5362	6
36	57-ZAT12-5-R24-SR1-FLT542-C-AQ1.tif	cd7fa143-5d2e-4e6a-8ae6-12f32f2e310d	6.69655	2.01957	26.9258	577	925	0	0	0	6.67388	4.18116	6
37	57-ZAT12-5-R24-SR1-FLT542-C-AQ1.tif	b1f2c9a0-87be-4a9f-8d72-3c453ad1e51e	8.04464	2.94562	30.0832	651	936	0	0	0	6.75325	4.71739	6
38	57-ZAT12-5-R24-SR1-FLT542-C-AQ1.tif	4d7d58b4-91ec-422e-993d-5ba1d54d687b	6.10556	2.0091	43.0116	1309	950	0	0	0	6.85426	9.48551	6
39	57-ZAT12-5-R24-SR1-FLT542-C-AQ1.tif	63cd21f4-3280-48af-a128-338d42248e08	7.01034	2.3321	79.404	1217	1019	0	0	0	7.35209	8.81884	6
40	57-ZAT12-5-R24-SR1-FLT542-C-AQ1.tif	53ab9f95-15d2-4f06-9aba-0e42320cc354	10.2714	2.65104	53.7122	1619	1038	0	0	0	7.48918	11.7319	6
41	57-ZAT12-5-R24-SR1-FLT542-C-AQ1.tif	4b1e2a38-4c71-4640-928a-d364724fce38	6.75304	2.20384	52.469	725	1059	0	0	0	7.64069	5.25362	6
42	57-ZAT12-5-R24-SR1-FLT542-C-AQ1.tif	3c6ebba6-3d95-43b9-83f7-44b4669fa80e	6.81818	2.18889	23.7697	653	1055	0	0	0	7.61183	4.73188	6
43	57-ZAT12-5-R24-SR1-FLT542-C-AQ1.tif	c04d60e4-980a-4bf5-87eb-1c8c575d3492	10.2278	2.69729	41.6173	1353	1077	0	0	0	7.77056	9.80435	6
44	57-ZAT12-5-R24-SR1-FLT542-C-AQ1.tif	7b60a577-90bf-4192-86e4-4e421d332408	7.1685	2.16352	35.805	566	1097	0	0	0	7.91486	4.10145	6
45	57-ZAT12-5-R24-SR1-FLT542-C-AQ1.tif	3022bd27-e16d-4a6d-94b1-6297e008d792	7.87302	2.36996	26.0768	1300	1110	0	0	0	8.00866	9.42029	6
46	57-ZAT12-5-R24-SR1-FLT542-C-AQ1.tif	21698534-ed14-42e6-96f2-0f4b4fef7531	6.97973	2.25363	25.9422	770	1113	0	0	0	8.0303	5.57971	6
47	57-ZAT12-5-R24-SR1-FLT542-C-AQ1.tif	0e85c493-0813-4018-998b-48bf09cce2b0	8.66667	2.4015	22.2036	1336	1126	0	0	0	8.1241	9.68116	6
48	57-ZAT12-5-R24-SR1-FLT542-C-AQ1.tif	8c9c6f4b-3d32-465f-9e0c-d0a4e9f733fd	10.7524	2.47298	25.632	630	1172	0	0	0	8.45599	4.56522	6
49	57-ZAT12-5-R24-SR1-FLT542-C-AQ1.tif	c0bcede9-64a2-498a-ac20-31f185e5932c	5.88448	1.78834	42.5206	178	1181	0	0	0	8.52092	1.28986	6
50	57-ZAT12-5-R24-SR1-FLT542-C-AQ1.tif	47919d5d-9bad-4344-b9e7-bdcdfc15ba1a	7.60563	2.49753	33.6155	747	1177	0	0	0	8.49206	5.41304	6
51	57-ZAT12-5-R24-SR1-FLT542-C-AQ1.tif	5bd6b480-92c2-4244-845b-8f5c23c3ad8b	7.58594	2.43357	23.3452	1215	1198	0	0	0	8.64358	8.80435	6
52	57-ZAT12-5-R24-SR1-FLT542-C-AQ1.tif	ec6cd047-d4bf-4dc2-93e4-f5b8d45c897e	11.0849	2.65957	18.868	742	1209	0	0	0	8.72294	5.37681	6
53	57-ZAT12-5-R24-SR1-FLT542-C-AQ1.tif	c4d89a40-88be-46e5-8fd5-743efbfa5b9c	10.3016	2.70288	54.4518	1017	1236	0	0	0	8.91775	7.36957	6
54	57-ZAT12-5-R24-SR1-FLT542-C-AQ1.tif	6e3cf1d5-cd73-4180-b152-d81cf702665e	6.88525	2.24762	41.9762	850	1242	0	0	0	8.96104	6.15942	6
55	57-ZAT12-5-R24-SR1-FLT542-C-AQ1.tif	4696d7b0-adfd-43b2-85b6-d8fb43da50c9	14.2373	2.61012	21.587	1301	1245	0	0	0	8.98268	9.42754	6
56	57-ZAT12-5-R24-SR1-FLT542-C-AQ1.tif	0ae37972-1706-4d28-b759-fcd919fb0f33	7.06849	1.88469	32.573	507	1259	0	0	0	9.08369	3.67391	6
57	57-ZAT12-5-R24-SR1-FLT542-C-AQ1.tif	d230f3b1-5165-4b25-9a2d-41fd64b9fe90	8.0487	2.26599	86.1278	1693	1291	0	0	0	9.31457	12.2681	6
58	57-ZAT12-5-R24-SR1-FLT542-C-AQ1.tif	32b6ab63-0d55-4d30-a59a-5ea3e6fb7df9	7.53697	2.20496	32.249	742	1271	0	0	0	9.17027	5.37681	6
59	57-ZAT12-5-R24-SR1-FLT542-C-AQ1.tif	66b8a741-b72f-4db5-b685-c4bb8d59f370	15.7705	2.86357	32.2025	1309	1278	0	0	0	9.22078	9.48551	6
60	57-ZAT12-5-R24-SR1-FLT542-C-AQ1.tif	dadc047a-d578-462a-a3f0-72c87c94e8cd	10.2655	2.33479	52.469	1429	1292	0	0	0	9.32179	10.3551	6
61	57-ZAT12-5-R24-SR1-FLT542-C-AQ1.tif	41e455e0-9a14-4caa-adc8-4729513e9456	6.40341	1.89483	119.854	1500	1365	0	0	0	9.84848	10.8696	6
62	57-ZAT12-5-R24-SR1-FLT542-C-AQ1.tif	5477efe3-9eab-4e34-a9e4-e2082f119831	7.44344	2.17812	35.609	582	1360	0	0	0	9.81241	4.21739	6
63	57-ZAT12-5-R24-SR1-FLT542-C-AQ1.tif	9e3b4d23-1113-4abd-8a0a-47e4ebc0db70	8.08158	2.06187	60.7454	1397	1384	0	0	0	9.98557	10.1232	6
64	57-ZAT12-5-R24-SR1-FLT542-C-AQ1.tif	567e37e0-c114-4cc0-addf-e88ddc8339b7	5.13675	2.36273	30.8058	802	1407	0	0	0	10.1515	5.81159	6
65	57-ZAT12-5-R24-SR1-FLT542-C-AQ1.tif	4c2a7a9d-ac94-49b6-849f-e3d87ed3389f	11.067	2.5687	53.7587	801	1470	0	0	0	10.6061	5.80435	6
66	57-ZAT12-5-R24-SR1-FLT542-C-AQ1.tif	215a6957-7af1-408e-9b3d-d44ffc10360b	5.58108	1.5569	41.4367	663	1491	0	0	0	10.7576	4.80435	6
67	57-ZAT12-5-R24-SR1-FLT542-C-AQ1.tif	cad56bb3-e5c4-4ba0-b888-57bd63455185	8.78261	2.27793	24.0832	753	1509	0	0	0	10.8874	5.45652	6
68	57-ZAT12-5-R24-SR1-FLT542-C-AQ1.tif	85d42497-9a1c-47fd-b609-235c31d86934	9.31579	2.36804	21.2603	1121	1569	0	0	0	11.3203	8.12319	6
69	57-ZAT12-5-R24-SR1-FLT542-C-AQ1.tif	0f126333-791a-445a-b7f8-04a61cabf8c4	5.5545	1.61433	56.4004	697	1598	0	0	0	11.5296	5.05072	6
70	57-ZAT12-5-R24-SR1-FLT542-C-AQ1.tif	e1586f67-d2a7-4285-a518-f51dd6e7ed15	12.8312	3.20061	47.0425	980	1636	0	0	0	11.8038	7.10145	6
71	57-ZAT12-5-R24-SR1-FLT542-C-AQ1.tif	3a3ef47a-a305-445e-aaa8-81fa53a9a095	12.0794	2.88305	24.0832	890	1679	0	0	0	12.114	6.44928	6
72	57-ZAT12-5-R24-SR1-FLT542-C-AQ1.tif	1055a0c4-a0e5-41a2-899b-aaa412c674a7	10.594	2.5765	42.5441	813	1713	0	0	0	12.3593	5.8913	6
73	57-ZAT12-5-R24-SR1-FLT542-C-AQ1.tif	597cabc7-0e97-41c2-ad73-a86183990662	12.6468	2.65579	27.4591	982	1742	0	0	0	12.5685	7.11594	6
74	57-ZAT12-5-R24-SR1-FLT542-C-AQ1.tif	d782d94e-33b0-4cc5-ab28-5e494160e2b9	9.47249	2.69149	38.5876	1092	1810	0	0	0	13.0592	7.91304	6
75	57-ZAT12-5-R24-SR1-FLT542-C-AQ1.tif	fb60ed50-3c83-4ee1-bf4a-be342fd8d19d	6.16547	1.77713	27.5862	1215	1853	0	0	0	13.3694	8.80435	6
76	57-ZAT12-5-R24-SR1-FLT542-C-AQ1.tif	1e7fcefe-ed16-46a7-a099-29c6adeb9f5f	7.25373	2.07819	27.5136	819	1901	0	0	0	13.7157	5.93478	6
77	57-ZAT12-5-R24-SR1-FLT542-C-AQ1.tif	74640aac-0c55-42ce-b35c-389161385eb8	6.55882	1.82623	41.3401	1183	1903	0	0	0	13.7302	8.57246	6
78	57-ZAT12-5-R24-SR1-FLT542-C-AQ1.tif	6d9bd9e8-0874-4088-89db-be1e9afba620	9.32734	2.39915	42.5441	794	1932	0	0	0	13.9394	5.75362	6
79	57-ZAT12-5-R24-SR1-FLT542-C-AQ1.tif	f287f3af-2a8b-43e0-a1ae-d1549982d859	5.92632	1.82593	18.6011	1134	1951	0	0	0	14.0765	8.21739	6
80	57-ZAT12-5-R24-SR1-FLT542-C-AQ1.tif	b797f3fb-ec60-4561-a2ca-f3ecc129e7c0	7.34177	2.33793	21.0238	801	1959	0	0	0	14.1342	5.80435	6
81	57-ZAT12-5-R24-SR1-FLT542-C-AQ1.tif	7c79dbca-7477-40d8-b1e0-0f6b517eef38	6.30303	1.99712	24.8395	883	2028	0	0	0	14.632	6.39855	6
82	57-ZAT12-5-R24-SR1-FLT542-C-AQ1.tif	d036d50c-f7a2-4615-9017-a3f22e08e904	7	1.57143	18.7883	834	2038	0	0	0	14.7042	6.04348	6
83	57-ZAT12-5-R24-SR1-FLT542-C-AQ1.tif	aee53343-9e48-43ce-9929-55bdfca032a3	8.7037	2.08191	18.0278	856	2072	0	0	0	14.9495	6.2029	6
84	57-ZAT12-5-R24-SR1-FLT542-C-AQ1.tif	22002b18-6717-4a65-8dd5-76570bf68c60	6.83942	1.89221	23.2594	853	2129	0	0	0	15.3608	6.18116	6
85	57-ZAT12-5-R24-SR1-FLT542-C-AQ1.tif	9ed9132c-2067-4f3f-adbf-a537a718a211	6.82639	1.81384	18.6011	911	2243	0	0	0	16.1833	6.60145	6
86	57-ZAT12-5-R24-SR1-FLT542-C-AQ1.tif	d2d7950a-995d-4ed7-95d6-38bc0ca273fd	6.736	1.92162	20.6155	946	2302	0	0	0	16.6089	6.85507	6
87	57-ZAT12-5-R24-SR1-FLT542-C-AQ1.tif	066fd8ca-9952-4081-afaa-0816ae86cbbd	5.4235	1.64736	75.71	880	2588	0	0	0	18.6724	6.37681	6

## Sheet: figure_4G_root_segment.csv
image	segment_id	length	direction	start_x	start_y	end_x	end_y	apex_id	intensity	intensity_ratio	diameter	rep_x	rep_y
57-ZAT12-5-R24-SR1-FLT542-C-AQ1.tif	b6842662-45f4-4950-9e07-6c9805aa283b	31.257	7.35237	996	4	992	35	-1	-1	-1	-1	-1	-1
57-ZAT12-5-R24-SR1-FLT542-C-AQ1.tif	0a4bb75c-d86b-47b2-a0b7-6204dbc1fe54	91.1976	3.77229	1022	31	1028	122	-1	-1	-1	-1	-1	-1
57-ZAT12-5-R24-SR1-FLT542-C-AQ1.tif	b60371ca-28f3-4605-a009-b0fa1db0f1db	24.3516	70.821	978	66	1001	74	-1	-1	-1	-1	-1	-1
57-ZAT12-5-R24-SR1-FLT542-C-AQ1.tif	43048f18-e9f3-441b-a405-705339369adf	73.0069	53.9149	1022	67	963	110	-1	-1	-1	-1	-1	-1
57-ZAT12-5-R24-SR1-FLT542-C-AQ1.tif	e664914c-c745-49d5-a1c8-83a59b399ba2	18.3848	67.6199	960	103	943	110	-1	-1	-1	-1	-1	-1
57-ZAT12-5-R24-SR1-FLT542-C-AQ1.tif	d3111f46-6d64-4561-ba88-be551ec14fd4	20.5913	60.9454	1027	123	1045	133	-1	-1	-1	-1	-1	-1
57-ZAT12-5-R24-SR1-FLT542-C-AQ1.tif	f3344153-84ac-4348-a008-fce7285f7515	76.1643	3.76404	1026	125	1031	201	-1	-1	-1	-1	-1	-1
57-ZAT12-5-R24-SR1-FLT542-C-AQ1.tif	ddc8b76e-7983-4df9-8276-4c722dd6cc33	132.966	43.7811	1025	146	933	242	-1	-1	-1	-1	-1	-1
57-ZAT12-5-R24-SR1-FLT542-C-AQ1.tif	c3068f54-d02f-4b86-9c61-ef10d9715550	27.7849	59.7436	969	166	945	180	-1	-1	-1	-1	-1	-1
57-ZAT12-5-R24-SR1-FLT542-C-AQ1.tif	805f8aa8-9a32-49da-a2a3-7ed48915d786	29.4109	54.6888	1090	183	1066	200	-1	-1	-1	-1	-1	-1
57-ZAT12-5-R24-SR1-FLT542-C-AQ1.tif	83cd9f30-e06f-4b85-b4ab-bc471c32ed59	49.8197	38.4802	1031	201	1062	240	-1	-1	-1	-1	-1	-1
57-ZAT12-5-R24-SR1-FLT542-C-AQ1.tif	594d255c-d3d0-4c7d-96ea-68f1c471c20e	16.1245	60.2551	1184	203	1170	211	-1	-1	-1	-1	-1	-1
57-ZAT12-5-R24-SR1-FLT542-C-AQ1.tif	98b40913-ceaf-4347-9050-5170ac8935b1	19.6977	23.9625	1134	209	1142	227	-1	-1	-1	-1	-1	-1
57-ZAT12-5-R24-SR1-FLT542-C-AQ1.tif	e958530c-3213-41fe-8934-b64ce863bebc	78.1025	13.3245	1041	212	1023	288	-1	-1	-1	-1	-1	-1
57-ZAT12-5-R24-SR1-FLT542-C-AQ1.tif	57b85d5f-5587-401f-94fb-c4653a802879	21.9317	46.8476	987	226	1003	241	-1	-1	-1	-1	-1	-1
57-ZAT12-5-R24-SR1-FLT542-C-AQ1.tif	9b22c4c6-06c1-458d-b535-6be2a0303582	39.3573	27.2161	1120	238	1138	273	-1	-1	-1	-1	-1	-1
57-ZAT12-5-R24-SR1-FLT542-C-AQ1.tif	a66dc623-06e1-490e-95e7-23db64677c6b	105.19	24.1284	1062	240	1105	336	-1	-1	-1	-1	-1	-1
57-ZAT12-5-R24-SR1-FLT542-C-AQ1.tif	b68d0fb7-6cc7-49db-b51d-a6e7438b00d1	23.6008	53.6156	930	246	911	260	-1	-1	-1	-1	-1	-1
57-ZAT12-5-R24-SR1-FLT542-C-AQ1.tif	b4cf5995-e42a-4a8c-9f4c-0f327ab08c98	40.4599	39.9869	972	261	998	292	-1	-1	-1	-1	-1	-1
57-ZAT12-5-R24-SR1-FLT542-C-AQ1.tif	b7527e25-669f-4be1-baf6-a2cb9811785c	18.2483	9.46232	886	262	883	280	-1	-1	-1	-1	-1	-1
57-ZAT12-5-R24-SR1-FLT542-C-AQ1.tif	676334a7-9686-4a03-bf86-69ca0773f216	29.8329	50.4403	907	266	884	285	-1	-1	-1	-1	-1	-1
57-ZAT12-5-R24-SR1-FLT542-C-AQ1.tif	be1b03c1-607f-462a-91d9-98368b39a913	40.8534	21.541	927	275	942	313	-1	-1	-1	-1	-1	-1
57-ZAT12-5-R24-SR1-FLT542-C-AQ1.tif	7ea1c4ab-80ee-4055-8759-8636dae17be6	34	61.9275	1022	277	992	293	-1	-1	-1	-1	-1	-1
57-ZAT12-5-R24-SR1-FLT542-C-AQ1.tif	93abddc7-4f95-4dbb-a014-6cc7391a32ae	51.6624	14.5742	884	286	871	336	-1	-1	-1	-1	-1	-1
57-ZAT12-5-R24-SR1-FLT542-C-AQ1.tif	6e7a870e-ac1f-4118-bc30-4e55207016fe	19.4165	11.8887	887	286	883	305	-1	-1	-1	-1	-1	-1
57-ZAT12-5-R24-SR1-FLT542-C-AQ1.tif	8765bdbd-12e8-48ba-b9c7-57f413dda5bd	73.3553	27.613	1051	289	1017	354	-1	-1	-1	-1	-1	-1
57-ZAT12-5-R24-SR1-FLT542-C-AQ1.tif	383c2e28-78b7-4449-9acd-318d317dbef1	27.4591	33.1113	991	293	976	316	-1	-1	-1	-1	-1	-1
57-ZAT12-5-R24-SR1-FLT542-C-AQ1.tif	aaf551be-62a7-4b04-9f03-746f2aa6d22f	52.6972	33.3885	1051	311	1022	355	-1	-1	-1	-1	-1	-1
57-ZAT12-5-R24-SR1-FLT542-C-AQ1.tif	74a3ba69-e61b-4559-9249-4c715ee1f5e6	31.9531	20.1363	1132	320	1143	350	-1	-1	-1	-1	-1	-1
57-ZAT12-5-R24-SR1-FLT542-C-AQ1.tif	31bda8fb-9f80-4246-b54b-9a08ae862eb7	61.2209	51.6325	810	333	762	371	-1	-1	-1	-1	-1	-1
57-ZAT12-5-R24-SR1-FLT542-C-AQ1.tif	bc8dfece-4ffc-407e-b7cb-6fb29cecf2df	31.8277	43.727	1256	335	1278	358	-1	-1	-1	-1	-1	-1
57-ZAT12-5-R24-SR1-FLT542-C-AQ1.tif	a736324b-045b-4c46-af16-a8dd9caa7160	15	53.1301	1115	336	1103	345	-1	-1	-1	-1	-1	-1
57-ZAT12-5-R24-SR1-FLT542-C-AQ1.tif	28a2bf04-0e4e-4442-bbf8-491d202ddea4	19.2354	27.8973	1185	337	1176	354	-1	-1	-1	-1	-1	-1
57-ZAT12-5-R24-SR1-FLT542-C-AQ1.tif	14e261b3-9748-4b16-8d4e-3dcee49ccb76	34.7131	41.4965	1094	341	1117	367	-1	-1	-1	-1	-1	-1
57-ZAT12-5-R24-SR1-FLT542-C-AQ1.tif	2e080c5b-072b-4e90-bc3a-712ed67c616a	20.5183	43.0251	836	345	822	360	-1	-1	-1	-1	-1	-1
57-ZAT12-5-R24-SR1-FLT542-C-AQ1.tif	eae847dc-98c3-475a-bfce-18d6b95e09f9	20.3961	11.3099	875	345	879	365	-1	-1	-1	-1	-1	-1
57-ZAT12-5-R24-SR1-FLT542-C-AQ1.tif	d1cc8c7c-f959-47ee-adbc-3e8191d64bca	28.6356	24.7751	1248	348	1260	374	-1	-1	-1	-1	-1	-1
57-ZAT12-5-R24-SR1-FLT542-C-AQ1.tif	b27c664f-ff60-4651-bf3f-bc2065774b08	31.3209	16.6992	726	356	717	386	-1	-1	-1	-1	-1	-1
57-ZAT12-5-R24-SR1-FLT542-C-AQ1.tif	75197525-151d-420e-8c04-b8244cbf3969	83.6002	6.87	1017	356	1027	439	-1	-1	-1	-1	-1	-1
57-ZAT12-5-R24-SR1-FLT542-C-AQ1.tif	f9a3e337-c344-4573-a02e-a17c575eb6b1	23.8537	56.9761	855	358	875	371	-1	-1	-1	-1	-1	-1
57-ZAT12-5-R24-SR1-FLT542-C-AQ1.tif	4b035bc9-55ea-452c-9d9b-1e7ba8a1970e	36.6197	34.992	1123	358	1144	388	-1	-1	-1	-1	-1	-1
57-ZAT12-5-R24-SR1-FLT542-C-AQ1.tif	55327a22-936d-4ff6-b458-a298d5985eae	49.0917	33.3664	917	366	890	407	-1	-1	-1	-1	-1	-1
57-ZAT12-5-R24-SR1-FLT542-C-AQ1.tif	9bef2827-b341-4f84-b5b6-64771607ad4b	25.9422	62.4472	740	376	717	388	-1	-1	-1	-1	-1	-1
57-ZAT12-5-R24-SR1-FLT542-C-AQ1.tif	ec155eea-3c51-497c-8a15-6b46a1a44abf	50.2494	5.71058	875	379	870	429	-1	-1	-1	-1	-1	-1
57-ZAT12-5-R24-SR1-FLT542-C-AQ1.tif	158f38bf-7696-45f4-a619-ae7886752eae	58.4123	38.0471	1163	380	1199	426	-1	-1	-1	-1	-1	-1
57-ZAT12-5-R24-SR1-FLT542-C-AQ1.tif	e9a1e127-2a0a-4388-928a-f114392a2abd	37.6431	39.6107	1292	380	1316	409	-1	-1	-1	-1	-1	-1
57-ZAT12-5-R24-SR1-FLT542-C-AQ1.tif	bd8f8b94-66fd-4d7b-ab1f-34525681b5d2	26.4008	52.6961	710	398	689	414	-1	-1	-1	-1	-1	-1
57-ZAT12-5-R24-SR1-FLT542-C-AQ1.tif	d229d30e-d9c4-4763-8ce5-da0bee1509e0	30.8707	65.0952	935	407	907	420	-1	-1	-1	-1	-1	-1
57-ZAT12-5-R24-SR1-FLT542-C-AQ1.tif	a262b11c-5875-4980-b3ef-52a14577d37b	30.8869	29.0546	889	408	874	435	-1	-1	-1	-1	-1	-1
57-ZAT12-5-R24-SR1-FLT542-C-AQ1.tif	828dab5a-266a-48fe-943b-21f865501562	156.08	26.2367	1316	409	1385	549	-1	-1	-1	-1	-1	-1
57-ZAT12-5-R24-SR1-FLT542-C-AQ1.tif	d985ce2a-e631-4c17-91f4-3b47b64909bf	21.9545	30.0686	1129	410	1118	429	-1	-1	-1	-1	-1	-1
57-ZAT12-5-R24-SR1-FLT542-C-AQ1.tif	b3c4773e-b70e-479d-9a4d-84ca755a24c6	25.4951	48.1798	965	412	946	429	-1	-1	-1	-1	-1	-1
57-ZAT12-5-R24-SR1-FLT542-C-AQ1.tif	864c1be0-01b8-40f9-ab98-dc8c127f563c	21.1896	19.29	1071	423	1078	443	-1	-1	-1	-1	-1	-1
57-ZAT12-5-R24-SR1-FLT542-C-AQ1.tif	647ed828-b22b-4642-bebf-0501037cc8cb	26.9258	31.3287	1199	425	1213	448	-1	-1	-1	-1	-1	-1
57-ZAT12-5-R24-SR1-FLT542-C-AQ1.tif	327626ef-1819-495e-8e2e-591bacae2e9a	35.5106	80.2724	1391	426	1426	432	-1	-1	-1	-1	-1	-1
57-ZAT12-5-R24-SR1-FLT542-C-AQ1.tif	69f56304-9e3c-44f2-92e4-fee9eb57d88f	35.805	35.9097	1132	430	1153	459	-1	-1	-1	-1	-1	-1
57-ZAT12-5-R24-SR1-FLT542-C-AQ1.tif	5b1f2167-6c0f-4dd4-96bd-e32cf087dec0	63.5059	63.8384	680	435	623	463	-1	-1	-1	-1	-1	-1
57-ZAT12-5-R24-SR1-FLT542-C-AQ1.tif	55f65b23-3845-4e5e-a041-22d3bfeb0b0d	37.108	14.0362	868	438	877	474	-1	-1	-1	-1	-1	-1
57-ZAT12-5-R24-SR1-FLT542-C-AQ1.tif	7077f6b9-37f9-4c0f-a3bb-ba05f3460bfc	25.0599	61.3895	1476	445	1498	457	-1	-1	-1	-1	-1	-1
57-ZAT12-5-R24-SR1-FLT542-C-AQ1.tif	85ea5757-8c2a-4ca2-9173-52848d6ba313	59.7746	17.5256	867	446	849	503	-1	-1	-1	-1	-1	-1
57-ZAT12-5-R24-SR1-FLT542-C-AQ1.tif	a7b4db12-3a21-402f-8b16-e56d7119472f	35.805	54.0903	1499	452	1528	473	-1	-1	-1	-1	-1	-1
57-ZAT12-5-R24-SR1-FLT542-C-AQ1.tif	60a69304-e2e4-4189-a78f-8c8f0f875faf	61.0573	31.6075	1217	453	1249	505	-1	-1	-1	-1	-1	-1
57-ZAT12-5-R24-SR1-FLT542-C-AQ1.tif	b4cd4c84-507d-48e1-a4c8-e23f4bf076b3	19.9249	72.4744	1151	464	1132	470	-1	-1	-1	-1	-1	-1
57-ZAT12-5-R24-SR1-FLT542-C-AQ1.tif	6721ac84-bd98-4e82-8232-ae295d97f625	31.4006	52.7652	1308	464	1333	483	-1	-1	-1	-1	-1	-1
57-ZAT12-5-R24-SR1-FLT542-C-AQ1.tif	933bdb50-5bc5-4780-9636-8e92c40bb605	44.9222	16.8214	957	470	944	513	-1	-1	-1	-1	-1	-1
57-ZAT12-5-R24-SR1-FLT542-C-AQ1.tif	8e006b8d-a8b6-482d-9c82-c12908bc1b3c	45.3542	14.0362	915	475	926	519	-1	-1	-1	-1	-1	-1
57-ZAT12-5-R24-SR1-FLT542-C-AQ1.tif	95eb19f8-ed87-4cd8-bc36-d4844c035dfe	43.382	25.9744	874	489	855	528	-1	-1	-1	-1	-1	-1
57-ZAT12-5-R24-SR1-FLT542-C-AQ1.tif	0b8a59ed-166a-4c32-b18b-6f2a27dabc23	59.9416	27.8476	848	495	820	548	-1	-1	-1	-1	-1	-1
57-ZAT12-5-R24-SR1-FLT542-C-AQ1.tif	c35a1217-5df5-4019-831b-302bba608bfe	23.4307	39.8056	1311	504	1326	522	-1	-1	-1	-1	-1	-1
57-ZAT12-5-R24-SR1-FLT542-C-AQ1.tif	f58c2201-1a71-4c31-a968-476e91331a4f	21.1896	70.7099	1250	505	1270	512	-1	-1	-1	-1	-1	-1
57-ZAT12-5-R24-SR1-FLT542-C-AQ1.tif	4174bb95-4666-4f57-895e-fc6d6e9e081a	33.7343	11.9761	705	509	698	542	-1	-1	-1	-1	-1	-1
57-ZAT12-5-R24-SR1-FLT542-C-AQ1.tif	dfcae86a-5381-47dc-b9b3-3fa78589c30b	91.0659	31.0717	553	514	506	592	-1	-1	-1	-1	-1	-1
57-ZAT12-5-R24-SR1-FLT542-C-AQ1.tif	a8288046-f053-4e7b-b490-c8c76d746aa9	18.6011	53.7462	1042	515	1057	526	-1	-1	-1	-1	-1	-1
57-ZAT12-5-R24-SR1-FLT542-C-AQ1.tif	683c885a-d2c2-4a37-8358-fd0a2a9341fa	32.5576	10.6197	1181	517	1175	549	-1	-1	-1	-1	-1	-1
57-ZAT12-5-R24-SR1-FLT542-C-AQ1.tif	5520187d-fb63-4688-8c5e-fe0d4b205e96	21.3776	10.7843	1284	524	1288	545	-1	-1	-1	-1	-1	-1
57-ZAT12-5-R24-SR1-FLT542-C-AQ1.tif	82f018b7-de92-47ca-8a06-ebf8d65a3fcd	16.4924	75.9638	855	529	871	533	-1	-1	-1	-1	-1	-1
57-ZAT12-5-R24-SR1-FLT542-C-AQ1.tif	69a4f084-be72-43cf-9644-a6d3bf597228	75.1665	3.81409	1010	532	1005	607	-1	-1	-1	-1	-1	-1
57-ZAT12-5-R24-SR1-FLT542-C-AQ1.tif	fb271340-0b36-4392-8bdc-743870c8f85e	20.5183	46.9749	854	534	839	548	-1	-1	-1	-1	-1	-1
57-ZAT12-5-R24-SR1-FLT542-C-AQ1.tif	b546ce03-cdee-4e88-addb-4d5b2c9005f9	35.3553	61.2602	819	540	788	557	-1	-1	-1	-1	-1	-1
57-ZAT12-5-R24-SR1-FLT542-C-AQ1.tif	fbeb4d8c-658c-4687-bd3c-31bdd20d80a4	23.4094	19.9831	1136	547	1144	569	-1	-1	-1	-1	-1	-1
57-ZAT12-5-R24-SR1-FLT542-C-AQ1.tif	95ea2998-546b-4813-abf5-a59ef3683992	35.1283	4.8991	1175	550	1172	585	-1	-1	-1	-1	-1	-1
57-ZAT12-5-R24-SR1-FLT542-C-AQ1.tif	355d9777-d994-48d3-986c-80aa0c155363	25.4951	78.6901	1439	558	1464	563	-1	-1	-1	-1	-1	-1
57-ZAT12-5-R24-SR1-FLT542-C-AQ1.tif	67bdc1a2-47ad-4b09-8354-e5712bebd4f1	22.4722	20.8545	1371	559	1379	580	-1	-1	-1	-1	-1	-1
57-ZAT12-5-R24-SR1-FLT542-C-AQ1.tif	ae4c703e-cf89-4358-963c-bf8be09d9c45	20.5183	43.0251	1084	562	1098	577	-1	-1	-1	-1	-1	-1
57-ZAT12-5-R24-SR1-FLT542-C-AQ1.tif	628d4d4c-1bdc-4076-a831-8a891a8aeaee	51.6236	44.2152	839	566	875	603	-1	-1	-1	-1	-1	-1
57-ZAT12-5-R24-SR1-FLT542-C-AQ1.tif	367e5141-2fbc-450e-b21f-a3286bc12c08	46.5725	14.9314	678	567	666	612	-1	-1	-1	-1	-1	-1
57-ZAT12-5-R24-SR1-FLT542-C-AQ1.tif	18705b9c-b598-4c08-96b1-5445a21d807e	18.2483	80.5377	559	576	541	579	-1	-1	-1	-1	-1	-1
57-ZAT12-5-R24-SR1-FLT542-C-AQ1.tif	b7902d2b-d322-472e-9872-47ef74dffddb	23.6008	36.3844	619	578	633	597	-1	-1	-1	-1	-1	-1
57-ZAT12-5-R24-SR1-FLT542-C-AQ1.tif	a65fa8c2-5936-4f04-aa1d-0e612afad8f5	32.6956	66.5713	1097	578	1127	591	-1	-1	-1	-1	-1	-1
57-ZAT12-5-R24-SR1-FLT542-C-AQ1.tif	b94bb943-091d-4843-b2e9-51a89cfe7b38	86.5563	40.3141	803	581	747	647	-1	-1	-1	-1	-1	-1
57-ZAT12-5-R24-SR1-FLT542-C-AQ1.tif	fb7ce964-2dff-4e0e-bb04-34170e60eed5	17.2627	79.992	1144	583	1127	586	-1	-1	-1	-1	-1	-1
57-ZAT12-5-R24-SR1-FLT542-C-AQ1.tif	ecdbd733-0046-4898-b2d9-9a55d5f86771	93.0484	20.7722	1230	585	1197	672	-1	-1	-1	-1	-1	-1
57-ZAT12-5-R24-SR1-FLT542-C-AQ1.tif	19f464ea-c640-4ef6-9dab-e5da6afc0929	48.5077	14.3227	1395	585	1407	632	-1	-1	-1	-1	-1	-1
57-ZAT12-5-R24-SR1-FLT542-C-AQ1.tif	73e59f39-3226-446a-880f-5074c4a08c69	46.2385	21.5713	1128	587	1111	630	-1	-1	-1	-1	-1	-1
57-ZAT12-5-R24-SR1-FLT542-C-AQ1.tif	d9317d70-7c44-4237-bc4a-26eb5e936c3a	28.178	27.4744	891	595	878	620	-1	-1	-1	-1	-1	-1
57-ZAT12-5-R24-SR1-FLT542-C-AQ1.tif	3d10da30-354f-4244-8555-7496694a893e	27.8029	52.3058	700	597	678	614	-1	-1	-1	-1	-1	-1
57-ZAT12-5-R24-SR1-FLT542-C-AQ1.tif	7c2711ef-2550-497e-b9f6-858ae3e00194	32.249	7.12501	972	597	976	629	-1	-1	-1	-1	-1	-1
57-ZAT12-5-R24-SR1-FLT542-C-AQ1.tif	22390a08-74a8-4abf-8739-86863d168dc4	38.0132	26.5651	495	601	478	635	-1	-1	-1	-1	-1	-1
57-ZAT12-5-R24-SR1-FLT542-C-AQ1.tif	d7d98463-66e4-497c-b8ae-1445e6a23c4f	29.1204	74.0546	469	604	441	612	-1	-1	-1	-1	-1	-1
57-ZAT12-5-R24-SR1-FLT542-C-AQ1.tif	346d8287-cd75-4262-ab9a-d4239faca2a9	161.419	33.8869	875	604	785	738	-1	-1	-1	-1	-1	-1
57-ZAT12-5-R24-SR1-FLT542-C-AQ1.tif	6e3b68fe-9b72-4175-87dd-e584735f6f7d	26.5707	70.2011	960	604	935	613	-1	-1	-1	-1	-1	-1
57-ZAT12-5-R24-SR1-FLT542-C-AQ1.tif	5099ecbe-6261-4d61-a5a2-cd3ec7d1a595	25.632	20.5561	665	606	656	630	-1	-1	-1	-1	-1	-1
57-ZAT12-5-R24-SR1-FLT542-C-AQ1.tif	f86d5810-4f25-48e8-82ce-ce5c4a74e20d	64.8845	24.5901	1392	606	1365	665	-1	-1	-1	-1	-1	-1
57-ZAT12-5-R24-SR1-FLT542-C-AQ1.tif	b84f6ac5-a5df-45aa-b3c4-f25ce599ffd5	18.9737	71.5651	655	609	637	615	-1	-1	-1	-1	-1	-1
57-ZAT12-5-R24-SR1-FLT542-C-AQ1.tif	c6277a0c-7d47-430e-9911-e92866dc4e53	34.1321	5.04245	773	609	770	643	-1	-1	-1	-1	-1	-1
57-ZAT12-5-R24-SR1-FLT542-C-AQ1.tif	13ad22ce-9bb6-400a-898d-a3eb42330caa	29.5296	61.6992	1096	610	1070	624	-1	-1	-1	-1	-1	-1
57-ZAT12-5-R24-SR1-FLT542-C-AQ1.tif	5e00f95f-51d7-4df5-8869-e12a83ac930f	30.0167	60.0184	440	611	414	626	-1	-1	-1	-1	-1	-1
57-ZAT12-5-R24-SR1-FLT542-C-AQ1.tif	e7fd6b86-6f58-4319-92ee-584e3a1dc04e	29.6142	11.6894	892	612	898	641	-1	-1	-1	-1	-1	-1
57-ZAT12-5-R24-SR1-FLT542-C-AQ1.tif	69682657-d5cf-44ec-9c01-e49746fd7ace	55.0727	29.3578	719	617	692	665	-1	-1	-1	-1	-1	-1
57-ZAT12-5-R24-SR1-FLT542-C-AQ1.tif	a3a32a68-4bbc-47b5-be3a-d76a9fd2432c	72.3395	5.55297	1003	619	996	691	-1	-1	-1	-1	-1	-1
57-ZAT12-5-R24-SR1-FLT542-C-AQ1.tif	26516d23-c95c-458c-bc38-95d516f85c27	63.2456	34.6951	547	624	583	676	-1	-1	-1	-1	-1	-1
57-ZAT12-5-R24-SR1-FLT542-C-AQ1.tif	ba055374-5154-4aa0-bed0-ece9fe79f4a1	43.9659	17.1986	1394	631	1381	673	-1	-1	-1	-1	-1	-1
57-ZAT12-5-R24-SR1-FLT542-C-AQ1.tif	33975c30-6685-428a-924d-989ffaf657e3	36.1248	48.3665	664	632	691	656	-1	-1	-1	-1	-1	-1
57-ZAT12-5-R24-SR1-FLT542-C-AQ1.tif	5afd933f-4f8b-4f65-822c-807655b07046	26.9072	41.9872	1136	635	1118	655	-1	-1	-1	-1	-1	-1
57-ZAT12-5-R24-SR1-FLT542-C-AQ1.tif	586aab16-34e2-4686-bf9a-cf6a3d14ae90	44.3847	14.3493	1320	639	1331	682	-1	-1	-1	-1	-1	-1
57-ZAT12-5-R24-SR1-FLT542-C-AQ1.tif	33ad4fa3-61ed-4f31-aa71-7908b74ebfa7	34.1321	58.1726	732	647	703	665	-1	-1	-1	-1	-1	-1
57-ZAT12-5-R24-SR1-FLT542-C-AQ1.tif	df5b6fa4-28de-4fce-be71-0b8ae8837b82	35.3412	64.8852	1491	647	1523	662	-1	-1	-1	-1	-1	-1
57-ZAT12-5-R24-SR1-FLT542-C-AQ1.tif	f668a92f-dd06-4902-ac0b-99ad062a24bf	25.0599	61.3895	634	648	612	660	-1	-1	-1	-1	-1	-1
57-ZAT12-5-R24-SR1-FLT542-C-AQ1.tif	45318c53-40bc-404e-9e8d-e8697475fb22	65.521	15.9454	770	649	752	712	-1	-1	-1	-1	-1	-1
57-ZAT12-5-R24-SR1-FLT542-C-AQ1.tif	9fdf7a04-6ed0-4dc3-81fc-feb918f9f2bc	38.8973	17.9691	913	649	925	686	-1	-1	-1	-1	-1	-1
57-ZAT12-5-R24-SR1-FLT542-C-AQ1.tif	a6ba8b05-d267-4bf5-aefe-efbd23562b0f	41.3038	83.047	1302	660	1261	665	-1	-1	-1	-1	-1	-1
57-ZAT12-5-R24-SR1-FLT542-C-AQ1.tif	8839e8d7-255d-4d33-aae8-fef356c1e636	52.345	46.5482	598	665	560	701	-1	-1	-1	-1	-1	-1
57-ZAT12-5-R24-SR1-FLT542-C-AQ1.tif	2cbab65d-0790-43f8-aaca-7661b4ac6431	51.614	35.5377	703	666	733	708	-1	-1	-1	-1	-1	-1
57-ZAT12-5-R24-SR1-FLT542-C-AQ1.tif	05577c67-64b6-4f8b-88e6-aca0282f76fd	23.4094	70.0169	1075	669	1053	677	-1	-1	-1	-1	-1	-1
57-ZAT12-5-R24-SR1-FLT542-C-AQ1.tif	d229b20d-99b4-4f95-b2ce-f793ebb82d7e	42.0476	2.72631	738	671	740	713	-1	-1	-1	-1	-1	-1
57-ZAT12-5-R24-SR1-FLT542-C-AQ1.tif	5141a61c-72f0-4488-a29b-190579428b92	54.1295	25.1448	1201	679	1224	728	-1	-1	-1	-1	-1	-1
57-ZAT12-5-R24-SR1-FLT542-C-AQ1.tif	ccb686f4-0103-4549-80e7-e607ad3510e4	61.4003	16.0736	1497	679	1514	738	-1	-1	-1	-1	-1	-1
57-ZAT12-5-R24-SR1-FLT542-C-AQ1.tif	c95ea6f6-a873-4a8d-a111-8757a79d50fe	30.5287	31.6075	1327	683	1343	709	-1	-1	-1	-1	-1	-1
57-ZAT12-5-R24-SR1-FLT542-C-AQ1.tif	de5b7767-81de-4322-8a38-2eb9cd59112a	44.9444	57.7244	1425	684	1463	708	-1	-1	-1	-1	-1	-1
57-ZAT12-5-R24-SR1-FLT542-C-AQ1.tif	967316bc-9dfe-4cf1-a674-056a10a8499b	56.4358	7.12501	1386	685	1379	741	-1	-1	-1	-1	-1	-1
57-ZAT12-5-R24-SR1-FLT542-C-AQ1.tif	61eac13a-ef69-4d5b-b8eb-a9f2a2b6c14d	100.717	6.84278	913	687	925	787	-1	-1	-1	-1	-1	-1
57-ZAT12-5-R24-SR1-FLT542-C-AQ1.tif	83c9ddb0-6ee0-4726-9c3a-9825beb12737	52.4309	34.9025	1189	691	1219	734	-1	-1	-1	-1	-1	-1
57-ZAT12-5-R24-SR1-FLT542-C-AQ1.tif	d2e596db-821e-4b7c-b6a1-e5e573d4587b	50.2494	58.8407	672	692	629	718	-1	-1	-1	-1	-1	-1
57-ZAT12-5-R24-SR1-FLT542-C-AQ1.tif	8c724342-ed32-4589-959f-2610a76876df	34.0588	40.2363	996	692	1018	718	-1	-1	-1	-1	-1	-1
57-ZAT12-5-R24-SR1-FLT542-C-AQ1.tif	2d570e7b-76e3-4ed8-9d58-22f035fe85d8	22.561	12.8043	996	694	991	716	-1	-1	-1	-1	-1	-1
57-ZAT12-5-R24-SR1-FLT542-C-AQ1.tif	dcafb169-5bbe-4b74-831f-1b60a09e8c46	49.4065	35.9421	1397	700	1426	740	-1	-1	-1	-1	-1	-1
57-ZAT12-5-R24-SR1-FLT542-C-AQ1.tif	a7d92135-aeff-4f6d-b09b-c62ed02b2c43	84.5991	32.9387	557	701	511	772	-1	-1	-1	-1	-1	-1
57-ZAT12-5-R24-SR1-FLT542-C-AQ1.tif	b2442b34-490d-4f1e-8936-aa0c44e6aaa7	123.693	22.8337	674	702	722	816	-1	-1	-1	-1	-1	-1
57-ZAT12-5-R24-SR1-FLT542-C-AQ1.tif	ce00f343-bcf1-4f08-a315-88cc7a2dd353	27.2947	61.5571	1134	702	1158	715	-1	-1	-1	-1	-1	-1
57-ZAT12-5-R24-SR1-FLT542-C-AQ1.tif	04bc142b-e8f5-4d9b-aa68-b5aa20fd245b	44.5533	44.0906	480	703	511	735	-1	-1	-1	-1	-1	-1
57-ZAT12-5-R24-SR1-FLT542-C-AQ1.tif	78d34101-b62a-4c37-aea3-717a9d8d7516	51.9711	30.0184	935	704	961	749	-1	-1	-1	-1	-1	-1
57-ZAT12-5-R24-SR1-FLT542-C-AQ1.tif	662d186c-4416-4554-8e7f-cca1e7abbcd2	24.2074	38.2902	1174	706	1159	725	-1	-1	-1	-1	-1	-1
57-ZAT12-5-R24-SR1-FLT542-C-AQ1.tif	466c6f14-98bb-48ba-9dfb-29b05258c569	23.3238	59.0362	1463	709	1483	721	-1	-1	-1	-1	-1	-1
57-ZAT12-5-R24-SR1-FLT542-C-AQ1.tif	eb171aab-522a-4c43-b936-d6d4c1a03981	21.4009	52.5946	545	710	528	723	-1	-1	-1	-1	-1	-1
57-ZAT12-5-R24-SR1-FLT542-C-AQ1.tif	238e5c06-4ae8-4106-88a7-a790b464873a	22.8473	66.8014	762	713	741	722	-1	-1	-1	-1	-1	-1
57-ZAT12-5-R24-SR1-FLT542-C-AQ1.tif	4495cc87-93af-4622-9303-1ea508e25fd2	43.2897	83.3675	426	715	383	720	-1	-1	-1	-1	-1	-1
57-ZAT12-5-R24-SR1-FLT542-C-AQ1.tif	08b410da-8004-4121-99a1-da9d7ab03119	25.632	20.5561	989	718	980	742	-1	-1	-1	-1	-1	-1
57-ZAT12-5-R24-SR1-FLT542-C-AQ1.tif	6b8dc991-4f2a-4b8e-90e7-fad3c929c8ae	21.9317	65.7722	1502	720	1482	729	-1	-1	-1	-1	-1	-1
57-ZAT12-5-R24-SR1-FLT542-C-AQ1.tif	099281f3-8f2a-4dda-8c25-4f6376dbe1b2	18.1108	6.34019	740	723	742	741	-1	-1	-1	-1	-1	-1
57-ZAT12-5-R24-SR1-FLT542-C-AQ1.tif	50c04d82-f5a5-484a-a775-e2b0c8cc03ea	57.2713	24.7751	622	724	598	776	-1	-1	-1	-1	-1	-1
57-ZAT12-5-R24-SR1-FLT542-C-AQ1.tif	2f79be05-bf57-4729-af5d-72b5e74d6377	15.8114	18.435	739	726	734	741	-1	-1	-1	-1	-1	-1
57-ZAT12-5-R24-SR1-FLT542-C-AQ1.tif	9fc15161-1307-4621-a6dd-5a12e103a9d2	49.4975	45	467	727	432	762	-1	-1	-1	-1	-1	-1
57-ZAT12-5-R24-SR1-FLT542-C-AQ1.tif	76e1c495-fa9b-4b33-8885-8c251f22db53	80.0562	41.4552	811	729	758	789	-1	-1	-1	-1	-1	-1
57-ZAT12-5-R24-SR1-FLT542-C-AQ1.tif	68da162a-61d9-46a5-8b66-0dc00b738678	40.7063	62.1759	1473	729	1437	748	-1	-1	-1	-1	-1	-1
57-ZAT12-5-R24-SR1-FLT542-C-AQ1.tif	18049164-15e2-41e4-ab74-79c7142c6d42	111.4	36.9728	1173	731	1240	820	-1	-1	-1	-1	-1	-1
57-ZAT12-5-R24-SR1-FLT542-C-AQ1.tif	543ea9fa-33d2-4c4b-abeb-f500ff67cae4	19.105	42.8789	1222	732	1235	746	-1	-1	-1	-1	-1	-1
57-ZAT12-5-R24-SR1-FLT542-C-AQ1.tif	ff7e9274-1171-4a63-b763-5b204cff3489	38.2884	40.7636	1515	738	1540	767	-1	-1	-1	-1	-1	-1
57-ZAT12-5-R24-SR1-FLT542-C-AQ1.tif	35f7b69b-bb94-42a9-9cd1-374c376baa7a	38.2099	47.1211	1230	740	1258	766	-1	-1	-1	-1	-1	-1
57-ZAT12-5-R24-SR1-FLT542-C-AQ1.tif	a7fd6cff-01ad-4d97-af10-3d8dee2d8a4e	43.9318	11.8215	1379	742	1388	785	-1	-1	-1	-1	-1	-1
57-ZAT12-5-R24-SR1-FLT542-C-AQ1.tif	e8e409cc-925c-40d2-9264-7f4cd87a0eb3	48.3735	60.2551	592	752	550	776	-1	-1	-1	-1	-1	-1
57-ZAT12-5-R24-SR1-FLT542-C-AQ1.tif	98020675-b471-4383-a0c4-3add6c4477cd	26.4197	60.5241	458	756	481	769	-1	-1	-1	-1	-1	-1
57-ZAT12-5-R24-SR1-FLT542-C-AQ1.tif	08f85d65-5802-449d-9c56-62e92aff732f	14.8661	47.7263	1127	756	1116	766	-1	-1	-1	-1	-1	-1
57-ZAT12-5-R24-SR1-FLT542-C-AQ1.tif	c0843d5f-8c1a-4801-801c-afc8464ad98d	40.7922	78.6901	1338	756	1298	764	-1	-1	-1	-1	-1	-1
57-ZAT12-5-R24-SR1-FLT542-C-AQ1.tif	15a7279a-43a7-496f-b433-7be8b718db1b	21.095	5.44033	981	758	983	779	-1	-1	-1	-1	-1	-1
57-ZAT12-5-R24-SR1-FLT542-C-AQ1.tif	bec7fb55-d8c5-4af1-9efe-adcf55886e96	31.5753	79.0459	1100	762	1069	768	-1	-1	-1	-1	-1	-1
57-ZAT12-5-R24-SR1-FLT542-C-AQ1.tif	54996c7c-f8ce-4651-867a-1d0bd2b21ece	158.092	33.3885	433	763	346	895	-1	-1	-1	-1	-1	-1
57-ZAT12-5-R24-SR1-FLT542-C-AQ1.tif	4086575f-406f-4396-b3e3-86be1ffcd65f	126.194	19.44	1104	763	1146	882	-1	-1	-1	-1	-1	-1
57-ZAT12-5-R24-SR1-FLT542-C-AQ1.tif	20b5cee4-7b12-421a-b097-704fe8e48942	24.7588	46.6366	1280	767	1298	784	-1	-1	-1	-1	-1	-1
57-ZAT12-5-R24-SR1-FLT542-C-AQ1.tif	aeee7608-5687-40b0-928c-c4c6cd561cff	26.8328	26.565	1069	769	1081	793	-1	-1	-1	-1	-1	-1
57-ZAT12-5-R24-SR1-FLT542-C-AQ1.tif	4213f5c7-b26b-49bb-abcd-84cd931c7038	59.0339	26.131	597	771	571	824	-1	-1	-1	-1	-1	-1
57-ZAT12-5-R24-SR1-FLT542-C-AQ1.tif	8616f450-9137-4c1f-b6b4-12458c6cc37b	23.7697	14.6209	1268	774	1274	797	-1	-1	-1	-1	-1	-1
57-ZAT12-5-R24-SR1-FLT542-C-AQ1.tif	733c0a0b-0bab-441c-865e-84808e656fc6	38.2753	56.7251	883	778	851	799	-1	-1	-1	-1	-1	-1
57-ZAT12-5-R24-SR1-FLT542-C-AQ1.tif	a89b35a1-6b42-42b0-af2e-c46dd715a3d0	51.264	20.5561	828	779	810	827	-1	-1	-1	-1	-1	-1
57-ZAT12-5-R24-SR1-FLT542-C-AQ1.tif	6defa5f9-c6f4-4062-b47f-1b0e37f7fcae	134.093	2.13692	982	780	987	914	-1	-1	-1	-1	-1	-1
57-ZAT12-5-R24-SR1-FLT542-C-AQ1.tif	0a16fe8b-40a7-4bb5-9b80-d879ef0f5b1a	47.8853	28.7059	545	781	522	823	-1	-1	-1	-1	-1	-1
57-ZAT12-5-R24-SR1-FLT542-C-AQ1.tif	af022ae7-4392-4d35-acb5-e3160d3cd91a	82.0975	34.0772	608	783	654	851	-1	-1	-1	-1	-1	-1
57-ZAT12-5-R24-SR1-FLT542-C-AQ1.tif	49c96e90-5c19-480e-995a-4512e4f771af	26.4197	29.4759	1485	784	1472	807	-1	-1	-1	-1	-1	-1
57-ZAT12-5-R24-SR1-FLT542-C-AQ1.tif	eb861f13-9344-4923-97e6-9f3bee2c3796	36.8782	77.4712	1529	786	1565	794	-1	-1	-1	-1	-1	-1
57-ZAT12-5-R24-SR1-FLT542-C-AQ1.tif	b0aa8b77-339b-4bb9-bd10-2fd735396ad1	38.0789	60.0685	1566	792	1599	811	-1	-1	-1	-1	-1	-1
57-ZAT12-5-R24-SR1-FLT542-C-AQ1.tif	c7563399-4cf0-44aa-b1d8-8d7f2bb65959	23.4094	19.9831	900	795	892	817	-1	-1	-1	-1	-1	-1
57-ZAT12-5-R24-SR1-FLT542-C-AQ1.tif	9e0f2e08-00d5-4808-8c23-c4288921a6a1	43.0116	72.4076	408	797	367	810	-1	-1	-1	-1	-1	-1
57-ZAT12-5-R24-SR1-FLT542-C-AQ1.tif	9bd44409-fdad-4175-befb-e6247941dd7b	24.4131	34.992	951	800	937	820	-1	-1	-1	-1	-1	-1
57-ZAT12-5-R24-SR1-FLT542-C-AQ1.tif	171fa21e-adee-4cab-81d6-2903b195388a	25.807	35.5377	1280	806	1295	827	-1	-1	-1	-1	-1	-1
57-ZAT12-5-R24-SR1-FLT542-C-AQ1.tif	6fef07ba-1dcb-416d-a9ad-5b2b1a5c5917	65	53.1301	559	809	507	848	-1	-1	-1	-1	-1	-1
57-ZAT12-5-R24-SR1-FLT542-C-AQ1.tif	99733e27-7253-4530-8e8a-a9a1ffa038ba	23.3452	43.2643	839	810	823	827	-1	-1	-1	-1	-1	-1
57-ZAT12-5-R24-SR1-FLT542-C-AQ1.tif	d7284161-59d9-436d-a654-bfd2510e2363	36.0694	43.8767	755	813	780	839	-1	-1	-1	-1	-1	-1
57-ZAT12-5-R24-SR1-FLT542-C-AQ1.tif	a875d9d1-6138-4633-9db4-022ac9ff6ada	65	53.1301	1480	813	1532	852	-1	-1	-1	-1	-1	-1
57-ZAT12-5-R24-SR1-FLT542-C-AQ1.tif	04eaa197-f0ec-4933-bf5f-9dec85880871	61.4003	37.0565	936	814	899	863	-1	-1	-1	-1	-1	-1
57-ZAT12-5-R24-SR1-FLT542-C-AQ1.tif	a31f879c-a8de-4eb0-a91f-dd85b12e2492	40.4969	20.2248	1091	819	1105	857	-1	-1	-1	-1	-1	-1
57-ZAT12-5-R24-SR1-FLT542-C-AQ1.tif	0203bb31-145e-4a3b-ac1d-02108f020957	22.1359	18.435	1252	824	1245	845	-1	-1	-1	-1	-1	-1
57-ZAT12-5-R24-SR1-FLT542-C-AQ1.tif	68f9d6b0-1d84-4a5d-b7b1-833bce05d354	66.6033	41.3478	1338	825	1294	875	-1	-1	-1	-1	-1	-1
57-ZAT12-5-R24-SR1-FLT542-C-AQ1.tif	36111c5a-962c-45cd-a7f1-8eb593a1a042	36.4006	20.9245	692	826	679	860	-1	-1	-1	-1	-1	-1
57-ZAT12-5-R24-SR1-FLT542-C-AQ1.tif	07ee50e6-4b21-46e7-87e4-cc8fc6d98e44	90.8735	24.0265	944	826	981	909	-1	-1	-1	-1	-1	-1
57-ZAT12-5-R24-SR1-FLT542-C-AQ1.tif	5d7373c0-9959-45a4-8c9e-ba81a4e7efdc	23.2594	25.4634	791	834	781	855	-1	-1	-1	-1	-1	-1
57-ZAT12-5-R24-SR1-FLT542-C-AQ1.tif	ab32741c-c54d-435f-bce8-17cc4f2052e4	37.4833	46.0809	1340	839	1367	865	-1	-1	-1	-1	-1	-1
57-ZAT12-5-R24-SR1-FLT542-C-AQ1.tif	d44228c0-a8c8-4cd7-b7d0-65f303abd325	25.318	80.9097	506	845	481	849	-1	-1	-1	-1	-1	-1
57-ZAT12-5-R24-SR1-FLT542-C-AQ1.tif	30de26b1-000d-471a-8446-261465f3f383	40.025	77.0054	480	848	441	857	-1	-1	-1	-1	-1	-1
57-ZAT12-5-R24-SR1-FLT542-C-AQ1.tif	858ad028-6214-4975-842e-f54fdaa0f023	25	53.1301	621	848	601	863	-1	-1	-1	-1	-1	-1
57-ZAT12-5-R24-SR1-FLT542-C-AQ1.tif	454439df-36c9-4852-a16b-4b299e646b1d	41.5933	27.1811	883	849	864	886	-1	-1	-1	-1	-1	-1
57-ZAT12-5-R24-SR1-FLT542-C-AQ1.tif	a74df4f3-500a-4f96-899a-f1f581d8953a	27.2029	17.1027	1533	850	1541	876	-1	-1	-1	-1	-1	-1
57-ZAT12-5-R24-SR1-FLT542-C-AQ1.tif	46f36fe7-dbdd-42bb-9ad6-5642cafa03fb	19.105	47.1211	656	852	670	865	-1	-1	-1	-1	-1	-1
57-ZAT12-5-R24-SR1-FLT542-C-AQ1.tif	78428daa-1c57-4ec0-b42e-4e1d70abebd3	25.5539	30.5792	1280	853	1293	875	-1	-1	-1	-1	-1	-1
57-ZAT12-5-R24-SR1-FLT542-C-AQ1.tif	7c169cf4-29c9-4f85-bdab-a7c5d59691fc	46.8615	50.1944	790	856	826	886	-1	-1	-1	-1	-1	-1
57-ZAT12-5-R24-SR1-FLT542-C-AQ1.tif	b61a6a64-20fb-4aa9-91f5-6292185a52cb	24.5967	26.5651	860	857	849	879	-1	-1	-1	-1	-1	-1
57-ZAT12-5-R24-SR1-FLT542-C-AQ1.tif	81e29de0-561d-4526-b422-3f0c9d3c546c	39.6232	47.0454	791	858	762	885	-1	-1	-1	-1	-1	-1
57-ZAT12-5-R24-SR1-FLT542-C-AQ1.tif	e25f0a8c-71e5-4487-85d6-6da36349630a	119.206	3.36646	1597	859	1590	978	-1	-1	-1	-1	-1	-1
57-ZAT12-5-R24-SR1-FLT542-C-AQ1.tif	e25d690b-b68e-4163-9757-daf45db57003	26.4764	79.1145	600	860	574	865	-1	-1	-1	-1	-1	-1
57-ZAT12-5-R24-SR1-FLT542-C-AQ1.tif	db800776-d922-4b59-a1f1-967cb0129eca	72.6154	22.6806	522	863	550	930	-1	-1	-1	-1	-1	-1
57-ZAT12-5-R24-SR1-FLT542-C-AQ1.tif	6d8bf0df-710d-43ac-867d-099be809ce49	40.5216	74.2488	650	863	611	874	-1	-1	-1	-1	-1	-1
57-ZAT12-5-R24-SR1-FLT542-C-AQ1.tif	b6a8f2d4-5236-4ef0-a256-3d395c37fea4	22.6716	41.4237	1112	866	1127	883	-1	-1	-1	-1	-1	-1
57-ZAT12-5-R24-SR1-FLT542-C-AQ1.tif	17ea702a-5e42-4759-aa5d-143d504d8048	30.5287	58.3925	703	867	677	883	-1	-1	-1	-1	-1	-1
57-ZAT12-5-R24-SR1-FLT542-C-AQ1.tif	f3132587-39e6-4de7-910b-87fb9ee7bda3	51.8941	25.0836	676	875	654	922	-1	-1	-1	-1	-1	-1
57-ZAT12-5-R24-SR1-FLT542-C-AQ1.tif	c07b7129-0dd6-4b4b-b48c-f377900482e2	78.8479	15.4463	1290	875	1311	951	-1	-1	-1	-1	-1	-1
57-ZAT12-5-R24-SR1-FLT542-C-AQ1.tif	e101add6-e73d-4f5f-92ba-c7c2f7b18c8d	44.0114	21.3179	1299	876	1315	917	-1	-1	-1	-1	-1	-1
57-ZAT12-5-R24-SR1-FLT542-C-AQ1.tif	3eb69711-4059-49c3-a906-de3459cf9d2b	29.4279	9.78241	738	877	733	906	-1	-1	-1	-1	-1	-1
57-ZAT12-5-R24-SR1-FLT542-C-AQ1.tif	a16a677f-87e8-4652-94df-1009a98abf33	107.424	61.049	668	880	574	932	-1	-1	-1	-1	-1	-1
57-ZAT12-5-R24-SR1-FLT542-C-AQ1.tif	2e985f38-dd20-416d-9cbd-14709bf02b4d	23.7065	62.354	791	884	812	895	-1	-1	-1	-1	-1	-1
57-ZAT12-5-R24-SR1-FLT542-C-AQ1.tif	80fe11e7-5a48-4ed0-ba4b-b81b4e2c1f43	66.468	45	835	885	788	932	-1	-1	-1	-1	-1	-1
57-ZAT12-5-R24-SR1-FLT542-C-AQ1.tif	1d0ed01d-879d-46e7-be76-b3250f1f6267	18.6011	53.7462	761	886	746	897	-1	-1	-1	-1	-1	-1
57-ZAT12-5-R24-SR1-FLT542-C-AQ1.tif	0ec8018d-4438-4121-a05c-451ecafc0d2d	22.2036	35.8376	1148	887	1161	905	-1	-1	-1	-1	-1	-1
57-ZAT12-5-R24-SR1-FLT542-C-AQ1.tif	d2ccddd5-c3de-44a0-aa4c-9323335b7522	23.7697	22.249	1456	896	1447	918	-1	-1	-1	-1	-1	-1
57-ZAT12-5-R24-SR1-FLT542-C-AQ1.tif	b7302950-0e9e-4129-8b98-b7d969f3e384	25.632	20.5561	888	901	879	925	-1	-1	-1	-1	-1	-1
57-ZAT12-5-R24-SR1-FLT542-C-AQ1.tif	387665b8-fdac-4435-8ae4-bfcca18ad682	45.793	58.3925	1410	902	1371	926	-1	-1	-1	-1	-1	-1
57-ZAT12-5-R24-SR1-FLT542-C-AQ1.tif	23aabbc2-dae6-4b24-a867-cf7ccc52f4f3	26.4008	37.304	839	903	823	924	-1	-1	-1	-1	-1	-1
57-ZAT12-5-R24-SR1-FLT542-C-AQ1.tif	a7d3c3f3-a9ad-4546-83c4-5ecfea805077	28.4605	18.435	736	908	727	935	-1	-1	-1	-1	-1	-1
57-ZAT12-5-R24-SR1-FLT542-C-AQ1.tif	31e15353-2086-4c7c-8261-ce35bb1fdd3d	23.3452	80.1342	430	912	453	916	-1	-1	-1	-1	-1	-1
57-ZAT12-5-R24-SR1-FLT542-C-AQ1.tif	d87acc08-90c8-4230-8032-7cd4998b68cd	34	28.0725	733	912	717	942	-1	-1	-1	-1	-1	-1
57-ZAT12-5-R24-SR1-FLT542-C-AQ1.tif	19db44b0-d094-49fe-b35e-a4c9d7b8644a	21.4709	62.2415	878	912	859	922	-1	-1	-1	-1	-1	-1
57-ZAT12-5-R24-SR1-FLT542-C-AQ1.tif	36ab948e-821c-42c8-aa00-005bda476344	38.2099	6.00901	749	913	745	951	-1	-1	-1	-1	-1	-1
57-ZAT12-5-R24-SR1-FLT542-C-AQ1.tif	e6721691-0dec-4347-88cb-b97621ef7e68	21.9317	43.1524	984	915	999	931	-1	-1	-1	-1	-1	-1
57-ZAT12-5-R24-SR1-FLT542-C-AQ1.tif	9106b10a-a766-42f2-98f5-c5d033fa66bd	78.6448	41.3915	983	916	931	975	-1	-1	-1	-1	-1	-1
57-ZAT12-5-R24-SR1-FLT542-C-AQ1.tif	4311713c-44d8-4bcb-a260-bd793401b0dd	32.5576	10.6197	1558	919	1552	951	-1	-1	-1	-1	-1	-1
57-ZAT12-5-R24-SR1-FLT542-C-AQ1.tif	bf337a40-e7ed-4277-9e08-155a4d29c51b	37.4433	34.1145	649	923	670	954	-1	-1	-1	-1	-1	-1
57-ZAT12-5-R24-SR1-FLT542-C-AQ1.tif	fd55d038-88ca-4816-a290-1fdce265a2dd	25.7099	76.5043	573	927	548	933	-1	-1	-1	-1	-1	-1
57-ZAT12-5-R24-SR1-FLT542-C-AQ1.tif	3a82581b-6e5a-4370-be13-a058dd1d934d	23.2594	64.5367	1112	931	1091	941	-1	-1	-1	-1	-1	-1
57-ZAT12-5-R24-SR1-FLT542-C-AQ1.tif	b6172ece-cc4e-4f14-ad7b-ed60f19b3c50	80.1311	29.1241	774	936	735	1006	-1	-1	-1	-1	-1	-1
57-ZAT12-5-R24-SR1-FLT542-C-AQ1.tif	3bd32029-878b-4ac1-82ad-43e2e312dbeb	24.7588	43.3634	1182	938	1199	956	-1	-1	-1	-1	-1	-1
57-ZAT12-5-R24-SR1-FLT542-C-AQ1.tif	8b27ffe2-085e-47ea-8631-a833e9a52010	61.7414	24.9048	316	939	290	995	-1	-1	-1	-1	-1	-1
57-ZAT12-5-R24-SR1-FLT542-C-AQ1.tif	d8807995-e9d6-4aee-a642-231432bea62c	35.7351	17.9279	1313	939	1324	973	-1	-1	-1	-1	-1	-1
57-ZAT12-5-R24-SR1-FLT542-C-AQ1.tif	80baab61-c247-4329-9b5b-a0b015654dfc	35.7351	17.9279	1336	940	1325	974	-1	-1	-1	-1	-1	-1
57-ZAT12-5-R24-SR1-FLT542-C-AQ1.tif	2b52a0b3-625c-46ee-8dfa-7cef4b7e63b4	55.5788	8.2759	1210	942	1218	997	-1	-1	-1	-1	-1	-1
57-ZAT12-5-R24-SR1-FLT542-C-AQ1.tif	c443f55b-24d5-4311-b74f-a759531c93e4	44.0114	21.3179	725	943	709	984	-1	-1	-1	-1	-1	-1
57-ZAT12-5-R24-SR1-FLT542-C-AQ1.tif	85e08516-178e-460c-af67-a72f80a362ba	38.8973	17.9691	717	944	705	981	-1	-1	-1	-1	-1	-1
57-ZAT12-5-R24-SR1-FLT542-C-AQ1.tif	5ec492e2-4521-4556-bee8-fa35f1ed7489	26.3059	81.2538	643	950	617	954	-1	-1	-1	-1	-1	-1
57-ZAT12-5-R24-SR1-FLT542-C-AQ1.tif	07b17b29-c75b-4225-9ca9-f3b0b751df5e	63.7887	9.01932	1311	952	1321	1015	-1	-1	-1	-1	-1	-1
57-ZAT12-5-R24-SR1-FLT542-C-AQ1.tif	7dcb7a9f-d85f-4190-b14e-681a57641763	16.4012	52.4314	813	955	800	965	-1	-1	-1	-1	-1	-1
57-ZAT12-5-R24-SR1-FLT542-C-AQ1.tif	b69c48ae-e828-41ff-ac76-60b6352d0ead	29.7321	42.2737	1615	956	1595	978	-1	-1	-1	-1	-1	-1
57-ZAT12-5-R24-SR1-FLT542-C-AQ1.tif	08fb5ef2-766b-4ad2-8ca9-4bc59973ab24	40.8044	36.0274	1637	956	1661	989	-1	-1	-1	-1	-1	-1
57-ZAT12-5-R24-SR1-FLT542-C-AQ1.tif	cea8ee36-1714-4bff-86d2-0ab11faad490	58.258	39.4278	799	961	762	1006	-1	-1	-1	-1	-1	-1
57-ZAT12-5-R24-SR1-FLT542-C-AQ1.tif	05c6420b-356d-4399-8a60-32482657de91	27.313	23.7495	1007	963	1018	988	-1	-1	-1	-1	-1	-1
57-ZAT12-5-R24-SR1-FLT542-C-AQ1.tif	efd08954-6178-41f4-9cb3-0e80a71de7a9	31.6228	18.435	905	964	915	994	-1	-1	-1	-1	-1	-1
57-ZAT12-5-R24-SR1-FLT542-C-AQ1.tif	1aa2ab20-f3ee-4e0a-acfd-cf364f967c39	29.8329	13.5704	1054	968	1061	997	-1	-1	-1	-1	-1	-1
57-ZAT12-5-R24-SR1-FLT542-C-AQ1.tif	024721a7-d428-446a-9b07-4b58345d3d06	18.3848	67.6199	1254	968	1237	975	-1	-1	-1	-1	-1	-1
57-ZAT12-5-R24-SR1-FLT542-C-AQ1.tif	97f23409-bce0-4a37-9edc-e9eac5515ff9	29.2746	7.85332	1324	975	1328	1004	-1	-1	-1	-1	-1	-1
57-ZAT12-5-R24-SR1-FLT542-C-AQ1.tif	52c9348d-9f85-4742-be11-bb0b899f1fd7	20.8806	16.6992	1595	979	1601	999	-1	-1	-1	-1	-1	-1
57-ZAT12-5-R24-SR1-FLT542-C-AQ1.tif	26597043-db48-4e99-b5ff-ac5a1c2c9a12	51.264	20.5561	708	983	690	1031	-1	-1	-1	-1	-1	-1
57-ZAT12-5-R24-SR1-FLT542-C-AQ1.tif	48a61f3a-05f5-4fa6-baad-0d47a5db1fb1	22.3607	63.4349	714	983	734	993	-1	-1	-1	-1	-1	-1
57-ZAT12-5-R24-SR1-FLT542-C-AQ1.tif	f0ae602c-14c8-4153-9a56-e2a4ab415de8	38.8973	46.0416	1170	988	1198	1015	-1	-1	-1	-1	-1	-1
57-ZAT12-5-R24-SR1-FLT542-C-AQ1.tif	d635f541-0f68-4e1c-9812-2cfcd8e18f79	28.4605	18.435	1017	989	1026	1016	-1	-1	-1	-1	-1	-1
57-ZAT12-5-R24-SR1-FLT542-C-AQ1.tif	34526296-43c2-4c64-92b7-07da70b7ab64	33.9559	76.373	1061	996	1094	1004	-1	-1	-1	-1	-1	-1
57-ZAT12-5-R24-SR1-FLT542-C-AQ1.tif	09f843fa-57b3-42ec-8747-aeca3dfd910b	14.1421	45	1611	999	1601	1009	-1	-1	-1	-1	-1	-1
57-ZAT12-5-R24-SR1-FLT542-C-AQ1.tif	005ef9a6-dc84-48ad-bc0f-554b47e9e7c8	26.4197	29.4759	1236	1000	1249	1023	-1	-1	-1	-1	-1	-1
57-ZAT12-5-R24-SR1-FLT542-C-AQ1.tif	75d52bf4-abb4-4f96-b804-6eaa537eaa71	14.7648	61.6992	1685	1000	1672	1007	-1	-1	-1	-1	-1	-1
57-ZAT12-5-R24-SR1-FLT542-C-AQ1.tif	d100d402-1cb3-4864-8ac9-11b2f513de4e	38.6005	73.4429	651	1002	614	1013	-1	-1	-1	-1	-1	-1
57-ZAT12-5-R24-SR1-FLT542-C-AQ1.tif	8a45cd8a-f2e5-4b38-9ec8-d4e0e1440c07	17.4642	23.6294	289	1003	282	1019	-1	-1	-1	-1	-1	-1
57-ZAT12-5-R24-SR1-FLT542-C-AQ1.tif	1ee2b3a9-3482-4f5b-9dda-a45b4d5a6bd6	37.5766	25.2011	688	1007	672	1041	-1	-1	-1	-1	-1	-1
57-ZAT12-5-R24-SR1-FLT542-C-AQ1.tif	d38e9a8c-18d0-4c93-9cc7-98bd6910daa2	24.8395	40.1009	747	1007	731	1026	-1	-1	-1	-1	-1	-1
57-ZAT12-5-R24-SR1-FLT542-C-AQ1.tif	1092838f-ea80-4ce5-873d-1b92a2a1b8a5	42.19	31.4296	1235	1007	1213	1043	-1	-1	-1	-1	-1	-1
57-ZAT12-5-R24-SR1-FLT542-C-AQ1.tif	e8ab9a97-6052-490e-9d0c-4bd5994b254a	81.7068	21.541	1329	1009	1359	1085	-1	-1	-1	-1	-1	-1
57-ZAT12-5-R24-SR1-FLT542-C-AQ1.tif	ff700896-4a35-4695-9c6c-f50dda5d7f41	71.6938	30.1414	1604	1010	1640	1072	-1	-1	-1	-1	-1	-1
57-ZAT12-5-R24-SR1-FLT542-C-AQ1.tif	93fbfaca-a437-489b-ba7b-1776349b67ea	47.2017	36.3844	895	1015	867	1053	-1	-1	-1	-1	-1	-1
57-ZAT12-5-R24-SR1-FLT542-C-AQ1.tif	5b4c170a-3fca-4ffe-9877-d2c84fda8f50	38.6005	73.4429	531	1018	568	1029	-1	-1	-1	-1	-1	-1
57-ZAT12-5-R24-SR1-FLT542-C-AQ1.tif	02d5770c-08d2-47b8-8e93-4e9d46173493	28.7924	20.3231	1321	1018	1331	1045	-1	-1	-1	-1	-1	-1
57-ZAT12-5-R24-SR1-FLT542-C-AQ1.tif	68f32cfe-37e1-4464-b720-d844ba7f80b3	17.0294	49.7636	1492	1018	1479	1029	-1	-1	-1	-1	-1	-1
57-ZAT12-5-R24-SR1-FLT542-C-AQ1.tif	2d50cde6-d9f6-4c24-82aa-420bc86c44ec	40.8044	36.0274	770	1022	794	1055	-1	-1	-1	-1	-1	-1
57-ZAT12-5-R24-SR1-FLT542-C-AQ1.tif	2cfad17f-9788-4c80-aab0-f0928511ab4a	36.4006	52.8153	617	1026	588	1048	-1	-1	-1	-1	-1	-1
57-ZAT12-5-R24-SR1-FLT542-C-AQ1.tif	a79e2702-f26e-4121-87db-5bacc23f1a05	55.6058	37.6942	722	1029	688	1073	-1	-1	-1	-1	-1	-1
57-ZAT12-5-R24-SR1-FLT542-C-AQ1.tif	9e90cbaf-a394-40c6-8cc5-202fe43e7d54	21.9317	24.2277	729	1029	738	1049	-1	-1	-1	-1	-1	-1
57-ZAT12-5-R24-SR1-FLT542-C-AQ1.tif	67eff3b5-e818-4bc8-8e9a-4107fdcb283a	43.9318	78.1785	858	1029	815	1038	-1	-1	-1	-1	-1	-1
57-ZAT12-5-R24-SR1-FLT542-C-AQ1.tif	443185ec-9ab5-4bd4-8911-dde416cb3e5c	33.5261	17.354	1025	1029	1035	1061	-1	-1	-1	-1	-1	-1
57-ZAT12-5-R24-SR1-FLT542-C-AQ1.tif	cca2eab2-c0c0-4ca4-828f-c5a96dc17016	102.65	42.2361	1678	1029	1747	1105	-1	-1	-1	-1	-1	-1
57-ZAT12-5-R24-SR1-FLT542-C-AQ1.tif	234b44ff-ac8e-494d-b144-ce4398e17097	17.4642	13.2405	1480	1030	1476	1047	-1	-1	-1	-1	-1	-1
57-ZAT12-5-R24-SR1-FLT542-C-AQ1.tif	875b8a79-c004-46a4-8e29-348f1fa8e130	89.0505	12.3194	919	1031	938	1118	-1	-1	-1	-1	-1	-1
57-ZAT12-5-R24-SR1-FLT542-C-AQ1.tif	55237e5f-e336-40e7-961b-fdd0d6b746fe	27.2947	8.42698	723	1032	727	1059	-1	-1	-1	-1	-1	-1
57-ZAT12-5-R24-SR1-FLT542-C-AQ1.tif	6a7c03d1-5867-4fb9-b141-ef55a89a2455	38.0789	29.9315	1005	1039	1024	1072	-1	-1	-1	-1	-1	-1
57-ZAT12-5-R24-SR1-FLT542-C-AQ1.tif	49ebf490-9645-4ebb-a5a5-9cfa0586787f	25.5539	30.5792	672	1044	659	1066	-1	-1	-1	-1	-1	-1
57-ZAT12-5-R24-SR1-FLT542-C-AQ1.tif	e7ad5d47-0426-4752-bd41-8ecaa1e6af4e	24.0416	45	1218	1044	1235	1061	-1	-1	-1	-1	-1	-1
57-ZAT12-5-R24-SR1-FLT542-C-AQ1.tif	e6207ac0-1c84-451b-945b-dc19914328f3	46.6905	43.2643	1218	1046	1250	1080	-1	-1	-1	-1	-1	-1
57-ZAT12-5-R24-SR1-FLT542-C-AQ1.tif	01ed1356-e1b9-4aff-94f3-3aac54c065cb	58.8558	9.78242	739	1051	749	1109	-1	-1	-1	-1	-1	-1
57-ZAT12-5-R24-SR1-FLT542-C-AQ1.tif	431bd0a8-8f19-4b79-8750-7e86d7b8e875	30.8707	24.9048	738	1052	725	1080	-1	-1	-1	-1	-1	-1
57-ZAT12-5-R24-SR1-FLT542-C-AQ1.tif	573e75ad-fc1d-443e-a4f5-92cfd7d80773	27.8926	75.4655	658	1055	631	1062	-1	-1	-1	-1	-1	-1
57-ZAT12-5-R24-SR1-FLT542-C-AQ1.tif	077dd93a-70aa-48fe-a4d1-8d4dae33ed77	34.8281	39.1736	581	1058	559	1085	-1	-1	-1	-1	-1	-1
57-ZAT12-5-R24-SR1-FLT542-C-AQ1.tif	4f3131e6-b3a9-4633-976f-c2628274d07c	19.799	45	621	1065	607	1079	-1	-1	-1	-1	-1	-1
57-ZAT12-5-R24-SR1-FLT542-C-AQ1.tif	c90bf4e6-709e-4c85-a524-a3afe939cf07	25.318	80.9097	662	1065	687	1069	-1	-1	-1	-1	-1	-1
57-ZAT12-5-R24-SR1-FLT542-C-AQ1.tif	e4bac075-e040-4889-bef1-8427ab90f00a	66.1891	26.9522	661	1067	631	1126	-1	-1	-1	-1	-1	-1
57-ZAT12-5-R24-SR1-FLT542-C-AQ1.tif	700295e7-5b5e-4e73-a69e-b23b812f1e19	21.9317	43.1524	711	1067	696	1083	-1	-1	-1	-1	-1	-1
57-ZAT12-5-R24-SR1-FLT542-C-AQ1.tif	423b1760-b0c7-413c-8204-e83ae94b9a19	33.3766	8.61565	1042	1067	1037	1100	-1	-1	-1	-1	-1	-1
57-ZAT12-5-R24-SR1-FLT542-C-AQ1.tif	621103a3-04bc-463e-bb09-d96f6c16fef1	58.6003	25.2531	1265	1074	1290	1127	-1	-1	-1	-1	-1	-1
57-ZAT12-5-R24-SR1-FLT542-C-AQ1.tif	713bc4d3-0635-488a-8571-4706ba506a67	130.25	7.94348	693	1076	675	1205	-1	-1	-1	-1	-1	-1
57-ZAT12-5-R24-SR1-FLT542-C-AQ1.tif	0bc5de82-f266-4d20-9b61-db4937e2eb7c	18.3848	22.3801	843	1077	850	1094	-1	-1	-1	-1	-1	-1
57-ZAT12-5-R24-SR1-FLT542-C-AQ1.tif	84fae0ff-2dc2-4fae-99e0-b324ad230da3	24.6982	58.2405	1358	1086	1379	1099	-1	-1	-1	-1	-1	-1
57-ZAT12-5-R24-SR1-FLT542-C-AQ1.tif	993db1de-8aac-4f81-88ab-0f6ffa98e217	41.6773	30.2564	1287	1087	1308	1123	-1	-1	-1	-1	-1	-1
57-ZAT12-5-R24-SR1-FLT542-C-AQ1.tif	d0fdeef3-0f65-48f4-abf0-173747bc6da0	90.2497	15.4222	1356	1087	1380	1174	-1	-1	-1	-1	-1	-1
57-ZAT12-5-R24-SR1-FLT542-C-AQ1.tif	acf05e43-e167-4813-aec1-500e20e58e65	33.6006	36.5289	556	1088	536	1115	-1	-1	-1	-1	-1	-1
57-ZAT12-5-R24-SR1-FLT542-C-AQ1.tif	1cb14ce1-1c9f-4285-8731-434a8126b3fd	51.6236	21.5953	652	1093	633	1141	-1	-1	-1	-1	-1	-1
57-ZAT12-5-R24-SR1-FLT542-C-AQ1.tif	f216fbff-8035-41ef-b14d-c1af42bd568b	37.108	75.9638	573	1096	609	1105	-1	-1	-1	-1	-1	-1
57-ZAT12-5-R24-SR1-FLT542-C-AQ1.tif	205275d2-4ad5-4215-a937-f2cf7df482a2	30.4138	46.3322	572	1097	550	1118	-1	-1	-1	-1	-1	-1
57-ZAT12-5-R24-SR1-FLT542-C-AQ1.tif	cc82d79e-907d-4313-bc56-a407f2124448	39.3954	23.9625	779	1097	763	1133	-1	-1	-1	-1	-1	-1
57-ZAT12-5-R24-SR1-FLT542-C-AQ1.tif	edd46593-882d-44ba-94ba-0861c60d302c	47.0106	29.2914	244	1108	221	1149	-1	-1	-1	-1	-1	-1
57-ZAT12-5-R24-SR1-FLT542-C-AQ1.tif	a78fd8a4-c92d-4fee-a031-d1fbca9f840c	30.6757	19.0256	851	1108	861	1137	-1	-1	-1	-1	-1	-1
57-ZAT12-5-R24-SR1-FLT542-C-AQ1.tif	06173c78-91ee-4cf7-a61a-f555a5fe19d4	22.2036	54.1623	1312	1110	1330	1123	-1	-1	-1	-1	-1	-1
57-ZAT12-5-R24-SR1-FLT542-C-AQ1.tif	76eb3396-ee16-4bef-a821-0cc5d507e564	42.72	69.4439	747	1111	707	1126	-1	-1	-1	-1	-1	-1
57-ZAT12-5-R24-SR1-FLT542-C-AQ1.tif	492c8dcb-ca33-4f8a-ab4c-725de40383f5	38.1182	4.51399	1035	1111	1038	1149	-1	-1	-1	-1	-1	-1
57-ZAT12-5-R24-SR1-FLT542-C-AQ1.tif	6c2926a5-7e00-4bce-a2b2-01be74337ef9	25.9615	15.6423	1030	1116	1023	1141	-1	-1	-1	-1	-1	-1
57-ZAT12-5-R24-SR1-FLT542-C-AQ1.tif	ecc29da6-77e0-4626-a986-4ef579b38f53	23.3238	30.9638	1340	1123	1352	1143	-1	-1	-1	-1	-1	-1
57-ZAT12-5-R24-SR1-FLT542-C-AQ1.tif	e93f271d-0172-4982-b526-fa268f0626fc	16.5529	64.9831	1339	1124	1324	1131	-1	-1	-1	-1	-1	-1
57-ZAT12-5-R24-SR1-FLT542-C-AQ1.tif	c6d04b0a-b3df-42ae-9ef2-d5100c91f297	101.592	20.7541	676	1125	640	1220	-1	-1	-1	-1	-1	-1
57-ZAT12-5-R24-SR1-FLT542-C-AQ1.tif	5bcfb977-66cd-4abc-b403-19f67351c3e4	18.0278	33.6901	638	1126	628	1141	-1	-1	-1	-1	-1	-1
57-ZAT12-5-R24-SR1-FLT542-C-AQ1.tif	5a3e8edf-3f70-4398-87dc-ffd760791fab	21.3776	79.2157	672	1127	651	1131	-1	-1	-1	-1	-1	-1
57-ZAT12-5-R24-SR1-FLT542-C-AQ1.tif	6a9f9458-e5f2-44e8-b8ce-97c6951b65a7	55.0363	24.7024	935	1131	958	1181	-1	-1	-1	-1	-1	-1
57-ZAT12-5-R24-SR1-FLT542-C-AQ1.tif	5eb191e3-acff-4091-875a-ac15573f4426	28.2843	45	1264	1139	1244	1159	-1	-1	-1	-1	-1	-1
57-ZAT12-5-R24-SR1-FLT542-C-AQ1.tif	cb6e96e8-fbd2-49a4-a713-31212f85e016	25.0599	28.6105	1292	1142	1304	1164	-1	-1	-1	-1	-1	-1
57-ZAT12-5-R24-SR1-FLT542-C-AQ1.tif	0e3d7f3c-7f55-45f9-8800-f4f2faf12ea3	70.342	14.8265	639	1145	621	1213	-1	-1	-1	-1	-1	-1
57-ZAT12-5-R24-SR1-FLT542-C-AQ1.tif	14ec34d4-a46b-4379-9248-90ae2508189f	25.1794	6.84278	862	1147	859	1172	-1	-1	-1	-1	-1	-1
57-ZAT12-5-R24-SR1-FLT542-C-AQ1.tif	e082e759-f028-486f-ac8f-67d75fea6b86	75.743	47.6754	212	1156	156	1207	-1	-1	-1	-1	-1	-1
57-ZAT12-5-R24-SR1-FLT542-C-AQ1.tif	8ce32342-d95f-424c-8eba-dd5c22073b6e	24.2074	51.7098	731	1163	750	1178	-1	-1	-1	-1	-1	-1
57-ZAT12-5-R24-SR1-FLT542-C-AQ1.tif	545c21ba-58d7-4225-8171-eae28aa45df6	32.5576	42.5104	751	1164	773	1188	-1	-1	-1	-1	-1	-1
57-ZAT12-5-R24-SR1-FLT542-C-AQ1.tif	f1efb526-aae4-4c2b-855c-6c98113a6241	53.8238	35.1664	1237	1164	1206	1208	-1	-1	-1	-1	-1	-1
57-ZAT12-5-R24-SR1-FLT542-C-AQ1.tif	75c616f7-6edb-4ba7-ab5a-0a18a6c9f6c8	78.1025	39.8056	1305	1164	1355	1224	-1	-1	-1	-1	-1	-1
57-ZAT12-5-R24-SR1-FLT542-C-AQ1.tif	602626df-b33b-40e0-990e-c2715e3ea3b6	98.27	31.2637	1630	1165	1681	1249	-1	-1	-1	-1	-1	-1
57-ZAT12-5-R24-SR1-FLT542-C-AQ1.tif	af3e2d42-2a5c-4cfd-b4f2-94e53b72205d	26.1725	6.58195	1305	1166	1308	1192	-1	-1	-1	-1	-1	-1
57-ZAT12-5-R24-SR1-FLT542-C-AQ1.tif	75ab02d4-0849-4f3c-9956-8cea6c87b699	79.3977	40.9144	1331	1171	1383	1231	-1	-1	-1	-1	-1	-1
57-ZAT12-5-R24-SR1-FLT542-C-AQ1.tif	bf3fbf79-e85e-4764-bb91-494941f86b20	59.5063	24.8424	1369	1171	1394	1225	-1	-1	-1	-1	-1	-1
57-ZAT12-5-R24-SR1-FLT542-C-AQ1.tif	b2bf89dd-5e19-49ab-9a2b-53507ecf47d1	20.6155	75.9638	858	1173	878	1178	-1	-1	-1	-1	-1	-1
57-ZAT12-5-R24-SR1-FLT542-C-AQ1.tif	bc729ca2-0643-41ed-8e69-55621f397535	101.178	42.9975	1119	1173	1188	1247	-1	-1	-1	-1	-1	-1
57-ZAT12-5-R24-SR1-FLT542-C-AQ1.tif	1ebf46d1-e256-4259-8b33-60b7d1415ff0	26.6833	77.0054	903	1182	929	1188	-1	-1	-1	-1	-1	-1
57-ZAT12-5-R24-SR1-FLT542-C-AQ1.tif	981bc3d4-fe5e-45c2-b9bd-085f00d1efdb	209.153	20.4278	642	1183	569	1379	-1	-1	-1	-1	-1	-1
57-ZAT12-5-R24-SR1-FLT542-C-AQ1.tif	d1d27201-0831-4d13-b98e-75f43286e7e6	36.3456	82.0929	499	1186	463	1191	-1	-1	-1	-1	-1	-1
57-ZAT12-5-R24-SR1-FLT542-C-AQ1.tif	5f9cd207-a82a-493e-85b5-98c256a5ad21	140.602	5.30512	858	1187	845	1327	-1	-1	-1	-1	-1	-1
57-ZAT12-5-R24-SR1-FLT542-C-AQ1.tif	58dac5ca-e10b-4570-8f5b-4e444a2cc566	24.8395	40.1009	1034	1187	1018	1206	-1	-1	-1	-1	-1	-1
57-ZAT12-5-R24-SR1-FLT542-C-AQ1.tif	15883e53-27ff-4510-b9d3-8fb7c572c95f	38.8973	46.0416	826	1188	854	1215	-1	-1	-1	-1	-1	-1
57-ZAT12-5-R24-SR1-FLT542-C-AQ1.tif	3e6c4cf4-e446-449d-8686-9b99229b7596	69.1231	14.2373	1314	1193	1297	1260	-1	-1	-1	-1	-1	-1
57-ZAT12-5-R24-SR1-FLT542-C-AQ1.tif	ef9e2b46-50f6-4078-aa8c-a4b03f5e12ac	30.2324	34.2157	747	1198	730	1223	-1	-1	-1	-1	-1	-1
57-ZAT12-5-R24-SR1-FLT542-C-AQ1.tif	c19be25e-5fd4-4d08-9dd0-8985252f0dec	21.6333	33.6901	988	1199	976	1217	-1	-1	-1	-1	-1	-1
57-ZAT12-5-R24-SR1-FLT542-C-AQ1.tif	7e7a7876-03bf-482f-8c66-be0b0cbdbd6d	80.7775	21.8014	1062	1206	1092	1281	-1	-1	-1	-1	-1	-1
57-ZAT12-5-R24-SR1-FLT542-C-AQ1.tif	da6dbf7f-fcdc-42d1-9cf7-f853a91eac2d	26.4008	37.304	1100	1211	1116	1232	-1	-1	-1	-1	-1	-1
57-ZAT12-5-R24-SR1-FLT542-C-AQ1.tif	e6919de3-e825-4834-a514-bdf8bfa19c9d	20.6155	67.1663	1431	1214	1412	1222	-1	-1	-1	-1	-1	-1
57-ZAT12-5-R24-SR1-FLT542-C-AQ1.tif	fd8d899f-f684-4271-a974-e342a82abea9	21.095	5.44033	1016	1219	1018	1240	-1	-1	-1	-1	-1	-1
57-ZAT12-5-R24-SR1-FLT542-C-AQ1.tif	0f2c86c8-e4fa-4b81-871e-ba9685b2ca45	22.2036	35.8376	697	1221	710	1239	-1	-1	-1	-1	-1	-1
57-ZAT12-5-R24-SR1-FLT542-C-AQ1.tif	4df9b21f-0d9a-4d2b-9e0b-9142ea87b44d	27.2029	36.0274	1386	1226	1402	1248	-1	-1	-1	-1	-1	-1
57-ZAT12-5-R24-SR1-FLT542-C-AQ1.tif	5350ac24-6c07-4a82-a466-3a9961a1f598	21.095	31.4296	1015	1227	1004	1245	-1	-1	-1	-1	-1	-1
57-ZAT12-5-R24-SR1-FLT542-C-AQ1.tif	d832f4bf-7ec8-4cfb-a6c4-7d2bd28ac742	30.6105	38.3675	1398	1229	1417	1253	-1	-1	-1	-1	-1	-1
57-ZAT12-5-R24-SR1-FLT542-C-AQ1.tif	cce496dc-15d3-432c-b459-5ebd2c451c8a	31.257	7.35237	1383	1231	1387	1262	-1	-1	-1	-1	-1	-1
57-ZAT12-5-R24-SR1-FLT542-C-AQ1.tif	4ea3d950-81e4-4a01-842f-fb60af3b6ac3	54.5711	13.7816	558	1233	571	1286	-1	-1	-1	-1	-1	-1
57-ZAT12-5-R24-SR1-FLT542-C-AQ1.tif	2898ed6a-af53-4d83-b002-5fe3c3d76aad	33.4216	51.0725	537	1234	511	1255	-1	-1	-1	-1	-1	-1
57-ZAT12-5-R24-SR1-FLT542-C-AQ1.tif	6168d0ce-ba48-4dd3-b45f-8c00ac6d8c33	52.8015	52.6961	701	1240	743	1272	-1	-1	-1	-1	-1	-1
57-ZAT12-5-R24-SR1-FLT542-C-AQ1.tif	193f9fb4-d97a-473c-82b2-35d9c8df28b5	28.8444	33.6901	1027	1241	1011	1265	-1	-1	-1	-1	-1	-1
57-ZAT12-5-R24-SR1-FLT542-C-AQ1.tif	de290c19-fcad-4d7b-bd1a-2c4923f356fd	48.7647	15.4612	1681	1247	1694	1294	-1	-1	-1	-1	-1	-1
57-ZAT12-5-R24-SR1-FLT542-C-AQ1.tif	b43c09ad-9e76-402f-a4a1-b71b693752d0	19.3132	21.2505	597	1252	590	1270	-1	-1	-1	-1	-1	-1
57-ZAT12-5-R24-SR1-FLT542-C-AQ1.tif	077c1e63-001a-4aff-83af-21deeee72aba	30.5941	11.3099	510	1254	504	1284	-1	-1	-1	-1	-1	-1
57-ZAT12-5-R24-SR1-FLT542-C-AQ1.tif	081db026-3fc1-425c-8031-6fea18979a1f	30.4138	46.3322	1177	1261	1199	1282	-1	-1	-1	-1	-1	-1
57-ZAT12-5-R24-SR1-FLT542-C-AQ1.tif	756f0d5a-83bf-4650-ac25-e4d186479786	32.249	7.12501	1057	1264	1061	1296	-1	-1	-1	-1	-1	-1
57-ZAT12-5-R24-SR1-FLT542-C-AQ1.tif	8a021af6-8aee-4287-9116-e4ddba102c44	17.4642	23.6294	1424	1264	1431	1280	-1	-1	-1	-1	-1	-1
57-ZAT12-5-R24-SR1-FLT542-C-AQ1.tif	2c2941f8-4471-4d70-9ff3-cf0b575d1dac	34.7131	11.6336	844	1271	837	1305	-1	-1	-1	-1	-1	-1
57-ZAT12-5-R24-SR1-FLT542-C-AQ1.tif	e0b23cf0-3b99-4137-8cf4-d3850fad0d42	28.6356	24.7751	1310	1271	1298	1297	-1	-1	-1	-1	-1	-1
57-ZAT12-5-R24-SR1-FLT542-C-AQ1.tif	cc7052f7-4b7c-4b62-ab09-377bf8092131	25.2389	56.3099	748	1275	769	1289	-1	-1	-1	-1	-1	-1
57-ZAT12-5-R24-SR1-FLT542-C-AQ1.tif	ab0c3aad-9dfd-4ccb-b120-52817a54184b	66.5282	42.5634	1425	1281	1470	1330	-1	-1	-1	-1	-1	-1
57-ZAT12-5-R24-SR1-FLT542-C-AQ1.tif	e2b7b27d-8838-4ded-9168-8ba74b735dff	33.0605	3.46823	548	1286	550	1319	-1	-1	-1	-1	-1	-1
57-ZAT12-5-R24-SR1-FLT542-C-AQ1.tif	5891e102-e2bc-4d03-9a8c-a26c29df3f8c	43.6807	15.9454	1392	1286	1404	1328	-1	-1	-1	-1	-1	-1
57-ZAT12-5-R24-SR1-FLT542-C-AQ1.tif	dded6ab8-b748-4b1a-8630-d296a7673b2a	14.4222	56.3099	579	1287	567	1295	-1	-1	-1	-1	-1	-1
57-ZAT12-5-R24-SR1-FLT542-C-AQ1.tif	bb864f9e-8d33-45ea-8d13-e5d525144025	53.7587	9.63753	1694	1291	1703	1344	-1	-1	-1	-1	-1	-1
57-ZAT12-5-R24-SR1-FLT542-C-AQ1.tif	352af4ba-abfe-4f30-a820-70ced61812f7	62.9365	44.3562	925	1300	881	1345	-1	-1	-1	-1	-1	-1
57-ZAT12-5-R24-SR1-FLT542-C-AQ1.tif	f6e66f37-5d6d-4a10-9716-96186bf98aef	20.6155	39.0939	997	1312	984	1328	-1	-1	-1	-1	-1	-1
57-ZAT12-5-R24-SR1-FLT542-C-AQ1.tif	f94a2776-9d98-4f9b-9c34-4684c9c618b5	106.513	24.3994	1415	1322	1371	1419	-1	-1	-1	-1	-1	-1
57-ZAT12-5-R24-SR1-FLT542-C-AQ1.tif	5d07dec9-a306-49c3-8b02-4dd84e6ce456	17.4642	23.6294	867	1325	860	1341	-1	-1	-1	-1	-1	-1
57-ZAT12-5-R24-SR1-FLT542-C-AQ1.tif	7adad447-69da-417b-a86e-91023e64d52c	17.8885	63.4349	1437	1328	1453	1336	-1	-1	-1	-1	-1	-1
57-ZAT12-5-R24-SR1-FLT542-C-AQ1.tif	32254429-fb44-4575-b77f-d38cc9233d6f	35.805	54.0903	1454	1331	1483	1352	-1	-1	-1	-1	-1	-1
57-ZAT12-5-R24-SR1-FLT542-C-AQ1.tif	ddfebfac-9c2b-475e-ad6c-ead442175074	28.6356	65.2249	692	1346	718	1358	-1	-1	-1	-1	-1	-1
57-ZAT12-5-R24-SR1-FLT542-C-AQ1.tif	85d2a21f-9e6a-44ab-bc0e-06df2c374284	108.706	39.4007	1483	1352	1552	1436	-1	-1	-1	-1	-1	-1
57-ZAT12-5-R24-SR1-FLT542-C-AQ1.tif	7e015727-948b-4436-b806-867c9871695c	57.3847	48.5323	844	1353	801	1391	-1	-1	-1	-1	-1	-1
57-ZAT12-5-R24-SR1-FLT542-C-AQ1.tif	a08222bc-bb00-48a1-b598-5e9ab10ddea7	24.2074	51.7098	559	1361	540	1376	-1	-1	-1	-1	-1	-1
57-ZAT12-5-R24-SR1-FLT542-C-AQ1.tif	f3ebc964-dc9c-4895-b392-46c9f3937c10	21.587	13.3925	1198	1363	1193	1384	-1	-1	-1	-1	-1	-1
57-ZAT12-5-R24-SR1-FLT542-C-AQ1.tif	26232b2e-929d-478f-a33e-b43449597157	64.0703	34.1861	866	1364	830	1417	-1	-1	-1	-1	-1	-1
57-ZAT12-5-R24-SR1-FLT542-C-AQ1.tif	24940810-49af-44a0-b829-7d9a58ef94b3	42.4264	8.13011	959	1380	953	1422	-1	-1	-1	-1	-1	-1
57-ZAT12-5-R24-SR1-FLT542-C-AQ1.tif	d96db31c-ccb2-40e8-96df-1a325cd309d0	46.9574	26.5651	525	1387	504	1429	-1	-1	-1	-1	-1	-1
57-ZAT12-5-R24-SR1-FLT542-C-AQ1.tif	b118226b-6b16-4fda-877e-2ece3a0c179a	98.0612	11.7683	806	1405	786	1501	-1	-1	-1	-1	-1	-1
57-ZAT12-5-R24-SR1-FLT542-C-AQ1.tif	246677aa-eb11-4b33-9a05-6eddcd299490	36.8917	57.1715	769	1423	738	1443	-1	-1	-1	-1	-1	-1
57-ZAT12-5-R24-SR1-FLT542-C-AQ1.tif	44d702ee-6b1b-4845-839e-566d83539c6d	90.9725	33.3407	883	1423	933	1499	-1	-1	-1	-1	-1	-1
57-ZAT12-5-R24-SR1-FLT542-C-AQ1.tif	9ac15caa-a42b-4d5e-9e4b-5f32f1592a53	51.0392	34.6242	1168	1434	1139	1476	-1	-1	-1	-1	-1	-1
57-ZAT12-5-R24-SR1-FLT542-C-AQ1.tif	5f79ff96-649b-4570-b5c4-4f16e3fea027	27.4591	56.8886	1065	1446	1088	1461	-1	-1	-1	-1	-1	-1
57-ZAT12-5-R24-SR1-FLT542-C-AQ1.tif	754905a7-4bb9-4367-b302-7a3754be3033	42.5793	9.46232	957	1450	950	1492	-1	-1	-1	-1	-1	-1
57-ZAT12-5-R24-SR1-FLT542-C-AQ1.tif	f92bc67d-1c09-4aff-a857-1744a714d679	48.7545	25.5139	761	1451	740	1495	-1	-1	-1	-1	-1	-1
57-ZAT12-5-R24-SR1-FLT542-C-AQ1.tif	3cf0d900-7888-42ab-84c8-0d7bd55793ae	72.0069	62.7232	703	1469	639	1502	-1	-1	-1	-1	-1	-1
57-ZAT12-5-R24-SR1-FLT542-C-AQ1.tif	66871812-371e-4161-bc0f-f600bf4d5806	31.1127	45	1198	1480	1220	1502	-1	-1	-1	-1	-1	-1
57-ZAT12-5-R24-SR1-FLT542-C-AQ1.tif	83b4897a-f10b-4ecc-b44f-3625879e4a2e	60.0083	23.5747	1131	1485	1107	1540	-1	-1	-1	-1	-1	-1
57-ZAT12-5-R24-SR1-FLT542-C-AQ1.tif	f9d60762-577a-4457-9075-d74543df0f8b	29.4109	35.3112	1198	1488	1181	1512	-1	-1	-1	-1	-1	-1
57-ZAT12-5-R24-SR1-FLT542-C-AQ1.tif	ee337234-8d30-4f32-aa77-aa08a0f128ad	22.0227	39.4725	1011	1493	1025	1510	-1	-1	-1	-1	-1	-1
57-ZAT12-5-R24-SR1-FLT542-C-AQ1.tif	e167c8da-d5b4-4563-827a-66d710d705f6	27.6586	49.3987	740	1500	761	1518	-1	-1	-1	-1	-1	-1
57-ZAT12-5-R24-SR1-FLT542-C-AQ1.tif	16da596a-3c75-465f-8101-9881f2f429f4	23.3452	43.2643	774	1507	758	1524	-1	-1	-1	-1	-1	-1
57-ZAT12-5-R24-SR1-FLT542-C-AQ1.tif	04c95620-a8a2-4e23-a2e3-e8096b68103a	62.6418	16.6992	1070	1514	1088	1574	-1	-1	-1	-1	-1	-1
57-ZAT12-5-R24-SR1-FLT542-C-AQ1.tif	abb06d56-ae40-45b6-8523-2a1231e7469c	54.5619	41.2847	1033	1515	1069	1556	-1	-1	-1	-1	-1	-1
57-ZAT12-5-R24-SR1-FLT542-C-AQ1.tif	c217b444-6aaf-4d45-9726-dfc00466747f	35.9026	12.875	929	1517	921	1552	-1	-1	-1	-1	-1	-1
57-ZAT12-5-R24-SR1-FLT542-C-AQ1.tif	d0872f16-ec33-443f-837e-f50104e82a45	59.5483	49.0856	385	1523	340	1562	-1	-1	-1	-1	-1	-1
57-ZAT12-5-R24-SR1-FLT542-C-AQ1.tif	0030b41a-1d56-4263-aff7-61fb8a1eef8b	47.3814	45.8551	1159	1530	1125	1563	-1	-1	-1	-1	-1	-1
57-ZAT12-5-R24-SR1-FLT542-C-AQ1.tif	67049dc1-b0ec-41bc-a547-f02a1dc25757	117.801	37.0645	755	1531	684	1625	-1	-1	-1	-1	-1	-1
57-ZAT12-5-R24-SR1-FLT542-C-AQ1.tif	d09c8651-b01c-47bb-842d-f1dd9b4b2651	81.5966	19.3232	785	1541	812	1618	-1	-1	-1	-1	-1	-1
57-ZAT12-5-R24-SR1-FLT542-C-AQ1.tif	0f761d06-1064-4c39-b8cc-acd59094e995	37.4833	43.9191	1120	1541	1094	1568	-1	-1	-1	-1	-1	-1
57-ZAT12-5-R24-SR1-FLT542-C-AQ1.tif	6695b94e-d1e8-4eb5-8a6f-7f1372105365	130.698	9.24611	967	1548	988	1677	-1	-1	-1	-1	-1	-1
57-ZAT12-5-R24-SR1-FLT542-C-AQ1.tif	dab09391-d95d-4c17-bb0d-79502929504a	13.4536	48.0128	1130	1553	1120	1562	-1	-1	-1	-1	-1	-1
57-ZAT12-5-R24-SR1-FLT542-C-AQ1.tif	77d6ab3f-45a3-4a3c-b116-592b983a9f3c	23.2594	25.4634	847	1554	837	1575	-1	-1	-1	-1	-1	-1
57-ZAT12-5-R24-SR1-FLT542-C-AQ1.tif	272d7747-9598-4a32-9f1a-4aa9d4f73361	109.772	6.80131	903	1563	890	1672	-1	-1	-1	-1	-1	-1
57-ZAT12-5-R24-SR1-FLT542-C-AQ1.tif	2d7a756e-3ed6-4042-91b1-6d567819da5f	19.799	45	1124	1565	1110	1579	-1	-1	-1	-1	-1	-1
57-ZAT12-5-R24-SR1-FLT542-C-AQ1.tif	e5250731-84d3-43a2-b4ec-08c0041cc363	33.2415	21.1613	1061	1571	1073	1602	-1	-1	-1	-1	-1	-1
57-ZAT12-5-R24-SR1-FLT542-C-AQ1.tif	22e6c37b-6ec9-4151-85f5-14b2594d74fd	28.6531	29.2488	1088	1577	1074	1602	-1	-1	-1	-1	-1	-1
57-ZAT12-5-R24-SR1-FLT542-C-AQ1.tif	6bd9feea-72ea-48ca-8a7d-07e47e153260	53.4509	17.418	1060	1583	1044	1634	-1	-1	-1	-1	-1	-1
57-ZAT12-5-R24-SR1-FLT542-C-AQ1.tif	6f0de71a-9147-4017-841a-421a3259b4c7	34.1321	5.04245	914	1588	911	1622	-1	-1	-1	-1	-1	-1
57-ZAT12-5-R24-SR1-FLT542-C-AQ1.tif	7ed59571-7a12-432e-ac9e-9ed1e6c4d6c6	35.7771	26.565	1074	1603	1090	1635	-1	-1	-1	-1	-1	-1
57-ZAT12-5-R24-SR1-FLT542-C-AQ1.tif	ab70009b-9983-4ced-bd04-60a0b5e85065	58	46.3972	1049	1621	1091	1661	-1	-1	-1	-1	-1	-1
57-ZAT12-5-R24-SR1-FLT542-C-AQ1.tif	b0586269-41f1-4ec8-bb1e-fc46dfc46454	35.609	38.1572	1173	1625	1195	1653	-1	-1	-1	-1	-1	-1
57-ZAT12-5-R24-SR1-FLT542-C-AQ1.tif	29c01f31-4dce-4e94-aa77-a0aea6c9ce77	22.4722	20.8545	909	1628	901	1649	-1	-1	-1	-1	-1	-1
57-ZAT12-5-R24-SR1-FLT542-C-AQ1.tif	24f7e8d8-4b71-4ae6-ac76-6988bf0e5751	25.632	20.5561	1123	1629	1132	1653	-1	-1	-1	-1	-1	-1
57-ZAT12-5-R24-SR1-FLT542-C-AQ1.tif	06065403-e668-4a75-b6fd-69bb5bc44c06	27.5136	19.0935	1048	1634	1039	1660	-1	-1	-1	-1	-1	-1
57-ZAT12-5-R24-SR1-FLT542-C-AQ1.tif	eba3716c-a927-438d-8541-e57c0357b478	17.4642	23.6294	888	1674	881	1690	-1	-1	-1	-1	-1	-1
57-ZAT12-5-R24-SR1-FLT542-C-AQ1.tif	3a4c86df-b29f-4796-aa5b-f3509a9e8235	34.1321	31.8275	732	1675	750	1704	-1	-1	-1	-1	-1	-1
57-ZAT12-5-R24-SR1-FLT542-C-AQ1.tif	03e84dae-94aa-4e9b-9883-23969c2b9ad4	28.4605	18.435	890	1676	881	1703	-1	-1	-1	-1	-1	-1
57-ZAT12-5-R24-SR1-FLT542-C-AQ1.tif	a49bf924-781b-4f21-a919-325e00af66df	34.4383	25.821	1003	1684	1018	1715	-1	-1	-1	-1	-1	-1
57-ZAT12-5-R24-SR1-FLT542-C-AQ1.tif	e5502c0f-102a-45dc-8843-9d7b103d8bd9	27.2029	17.1027	822	1693	814	1719	-1	-1	-1	-1	-1	-1
57-ZAT12-5-R24-SR1-FLT542-C-AQ1.tif	2c7fff6a-1c1d-4a97-87b7-a3a2d38260fa	49.6488	9.27261	889	1695	897	1744	-1	-1	-1	-1	-1	-1
57-ZAT12-5-R24-SR1-FLT542-C-AQ1.tif	1e6ea263-02ac-42b4-a4bc-0a7d66d5740f	32.5576	47.4896	1321	1703	1345	1725	-1	-1	-1	-1	-1	-1
57-ZAT12-5-R24-SR1-FLT542-C-AQ1.tif	79f36ddc-be41-48b6-9cb1-a3e546113a94	22.8473	23.1986	813	1714	804	1735	-1	-1	-1	-1	-1	-1
57-ZAT12-5-R24-SR1-FLT542-C-AQ1.tif	c42f8e86-e81c-4642-a674-578e60334fac	143.126	55.5327	1028	1716	1146	1797	-1	-1	-1	-1	-1	-1
57-ZAT12-5-R24-SR1-FLT542-C-AQ1.tif	c2823a0c-9242-4c74-b7b5-8c5e1de0a65d	35	36.8699	991	1731	970	1759	-1	-1	-1	-1	-1	-1
57-ZAT12-5-R24-SR1-FLT542-C-AQ1.tif	619501f2-71c5-40e3-85ef-241df7848cde	50.2494	47.4195	1200	1747	1237	1781	-1	-1	-1	-1	-1	-1
57-ZAT12-5-R24-SR1-FLT542-C-AQ1.tif	35ec638f-3901-4fd4-a461-6b7322b459d5	24.4131	34.992	1147	1750	1161	1770	-1	-1	-1	-1	-1	-1
57-ZAT12-5-R24-SR1-FLT542-C-AQ1.tif	eca7ecf9-d9c0-4dc3-8402-c8afa54505bf	68.942	23.9625	1073	1771	1101	1834	-1	-1	-1	-1	-1	-1
57-ZAT12-5-R24-SR1-FLT542-C-AQ1.tif	64f43f77-75be-4ee1-b642-a8ffb098bcb2	61	10.3889	885	1772	874	1832	-1	-1	-1	-1	-1	-1
57-ZAT12-5-R24-SR1-FLT542-C-AQ1.tif	387e46e9-43b0-4bd8-b749-51ff8f301bd3	77.6209	21.9385	916	1782	945	1854	-1	-1	-1	-1	-1	-1
57-ZAT12-5-R24-SR1-FLT542-C-AQ1.tif	f611cb32-fb3c-469b-b9db-15a4cd0290be	20.6155	67.1664	1157	1805	1176	1813	-1	-1	-1	-1	-1	-1
57-ZAT12-5-R24-SR1-FLT542-C-AQ1.tif	b7b1cb11-e171-43cb-b81e-11e04b58c830	42.2019	53.6732	1156	1807	1190	1832	-1	-1	-1	-1	-1	-1
57-ZAT12-5-R24-SR1-FLT542-C-AQ1.tif	7304e078-3559-4d4f-bf66-f0ec743199bf	57.4543	58.5232	1027	1817	1076	1847	-1	-1	-1	-1	-1	-1
57-ZAT12-5-R24-SR1-FLT542-C-AQ1.tif	4558eae0-f794-4792-80ea-d24b0dc537d8	20.8087	35.2176	1185	1819	1197	1836	-1	-1	-1	-1	-1	-1
57-ZAT12-5-R24-SR1-FLT542-C-AQ1.tif	989e7215-8ee0-4ecc-bc39-3d7bc61384d8	48.6004	53.3659	973	1830	1012	1859	-1	-1	-1	-1	-1	-1
57-ZAT12-5-R24-SR1-FLT542-C-AQ1.tif	1c0f4a50-2df9-432d-ad0c-78b5ced45316	42.4264	45	1203	1836	1233	1866	-1	-1	-1	-1	-1	-1
57-ZAT12-5-R24-SR1-FLT542-C-AQ1.tif	07aa9764-eb16-4bfe-a66f-cc1abe4c7fa9	85.4225	27.165	849	1845	810	1921	-1	-1	-1	-1	-1	-1
57-ZAT12-5-R24-SR1-FLT542-C-AQ1.tif	4998893b-6ff0-40a6-a420-8aa4cca13c50	152.201	60.9088	1082	1848	1215	1922	-1	-1	-1	-1	-1	-1
57-ZAT12-5-R24-SR1-FLT542-C-AQ1.tif	af8cae0e-f715-4f80-945d-b8e10a16bdb7	29.5296	28.3008	1294	1885	1308	1911	-1	-1	-1	-1	-1	-1
57-ZAT12-5-R24-SR1-FLT542-C-AQ1.tif	60becaea-59bb-4fdc-99f6-f356708595b0	36.2353	39.4007	816	1901	793	1929	-1	-1	-1	-1	-1	-1
57-ZAT12-5-R24-SR1-FLT542-C-AQ1.tif	f528777f-7022-4fe9-a6ec-e53aed019280	59.4054	53.9017	1062	1901	1110	1936	-1	-1	-1	-1	-1	-1
57-ZAT12-5-R24-SR1-FLT542-C-AQ1.tif	691532e4-e953-4dc6-968e-8d5881fafbb6	49.6488	55.6698	1111	1930	1152	1958	-1	-1	-1	-1	-1	-1
57-ZAT12-5-R24-SR1-FLT542-C-AQ1.tif	bcd8afbd-a212-4aac-9c92-43c9785d7a97	32.9848	75.9638	822	1955	790	1963	-1	-1	-1	-1	-1	-1
57-ZAT12-5-R24-SR1-FLT542-C-AQ1.tif	7e189ddd-26ee-451d-b7ad-22eb1a3b2dac	33.5261	72.646	962	1970	994	1980	-1	-1	-1	-1	-1	-1
57-ZAT12-5-R24-SR1-FLT542-C-AQ1.tif	53f47164-0b4f-4e77-a807-7d234882dc6f	49.4065	54.0579	890	1982	850	2011	-1	-1	-1	-1	-1	-1
57-ZAT12-5-R24-SR1-FLT542-C-AQ1.tif	f50d7e6f-c886-46e4-8635-25a1b792e8bc	70.6612	63.0723	886	2014	823	2046	-1	-1	-1	-1	-1	-1
57-ZAT12-5-R24-SR1-FLT542-C-AQ1.tif	6c8a0f95-43dc-476a-86df-a52aadf88fc7	33.9706	47.3859	895	2022	870	2045	-1	-1	-1	-1	-1	-1
57-ZAT12-5-R24-SR1-FLT542-C-AQ1.tif	a2e74165-42ce-4996-98c0-f9c3466c44ef	57.4543	58.5232	894	2051	845	2081	-1	-1	-1	-1	-1	-1
57-ZAT12-5-R24-SR1-FLT542-C-AQ1.tif	656e31a0-aa6e-41b1-ab37-7fde8cd1d3f0	99.8098	37.6736	911	2063	850	2142	-1	-1	-1	-1	-1	-1
57-ZAT12-5-R24-SR1-FLT542-C-AQ1.tif	a6412f48-1b25-461c-91f7-c3eb3ebdfd64	73.9797	9.33501	962	2123	950	2196	-1	-1	-1	-1	-1	-1
57-ZAT12-5-R24-SR1-FLT542-C-AQ1.tif	02752d23-757e-4b40-b261-9d70889dd263	20.2485	57.0948	900	2161	883	2172	-1	-1	-1	-1	-1	-1
57-ZAT12-5-R24-SR1-FLT542-C-AQ1.tif	07ab2d4d-907e-4ffa-a2bd-ef855a43333d	18.3576	60.6422	888	2189	872	2198	-1	-1	-1	-1	-1	-1
57-ZAT12-5-R24-SR1-FLT542-C-AQ1.tif	9f5fbbb1-18dd-45a3-ad81-42691ce84cd5	35	53.1301	943	2229	915	2250	-1	-1	-1	-1	-1	-1
57-ZAT12-5-R24-SR1-FLT542-C-AQ1.tif	f0b420db-436d-4f54-b80e-fc7ce73756db	31.6228	71.5651	954	2264	984	2274	-1	-1	-1	-1	-1	-1
57-ZAT12-5-R24-SR1-FLT542-C-AQ1.tif	25da2f26-2117-46e2-9b3a-a79fb5d50bd0	31.1127	45	937	2295	959	2317	-1	-1	-1	-1	-1	-1
57-ZAT12-5-R24-SR1-FLT542-C-AQ1.tif	43d3cf37-23fc-4d9f-9472-022f9b7034ee	26.4197	60.5241	912	2326	889	2339	-1	-1	-1	-1	-1	-1
57-ZAT12-5-R24-SR1-FLT542-C-AQ1.tif	c787ebe8-4b7d-47b0-b778-6f18ecae035e	21.0238	64.6538	889	2412	908	2421	-1	-1	-1	-1	-1	-1
57-ZAT12-5-R24-SR1-FLT542-C-AQ1.tif	bc4b80d1-7e3e-4e07-96f3-9548530d7c0e	23.5372	77.7352	906	2422	929	2427	-1	-1	-1	-1	-1	-1
57-ZAT12-5-R24-SR1-FLT542-C-AQ1.tif	03c83766-9688-4587-8112-7053a4302e30	85	8.79742	886	2540	873	2624	-1	-1	-1	-1	-1	-1
