# Supplementary material for: GLO-Roots: an imaging platform enabling multidimensional characterization of soil-grown root systems
Source: eLife. 2015 Aug 19;4:e07597. doi: 10.7554/eLife.07597 (PMC4589753; doi:10.7554/eLife.07597)
Supplement: Figure 6—source data 2. — DOI: http://dx.doi.org/10.7554/eLife.07597.039 [file elife07597s016.xlsx]

## Sheet: Figure6-fs2C,D
	experiment	das	phosphorus	plant	aq	x	y	angle	count
1	53	22	high	1	1.tif	0	0	90	0.484818
2	53	22	high	1	1.tif	0	0	88	0.353032
3	53	22	high	1	1.tif	0	0	86	0.397948
4	53	22	high	1	1.tif	0	0	84	0.44113
5	53	22	high	1	1.tif	0	0	82	0.397804
6	53	22	high	1	1.tif	0	0	80	0.485162
7	53	22	high	1	1.tif	0	0	78	0.494878
8	53	22	high	1	1.tif	0	0	76	0.533021
9	53	22	high	1	1.tif	0	0	74	0.549015
10	53	22	high	1	1.tif	0	0	72	0.611842
11	53	22	high	1	1.tif	0	0	70	0.597733
12	53	22	high	1	1.tif	0	0	68	0.615056
13	53	22	high	1	1.tif	0	0	66	0.551387
14	53	22	high	1	1.tif	0	0	64	0.601642
15	53	22	high	1	1.tif	0	0	62	0.683672
16	53	22	high	1	1.tif	0	0	60	0.832162
17	53	22	high	1	1.tif	0	0	58	1.03834
18	53	22	high	1	1.tif	0	0	56	1.20992
19	53	22	high	1	1.tif	0	0	54	1.27115
20	53	22	high	1	1.tif	0	0	52	1.41226
21	53	22	high	1	1.tif	0	0	50	1.6247
22	53	22	high	1	1.tif	0	0	48	1.88348
23	53	22	high	1	1.tif	0	0	46	1.90008
24	53	22	high	1	1.tif	0	0	44	1.95816
25	53	22	high	1	1.tif	0	0	42	1.87541
26	53	22	high	1	1.tif	0	0	40	1.83989
27	53	22	high	1	1.tif	0	0	38	1.78015
28	53	22	high	1	1.tif	0	0	36	1.69824
29	53	22	high	1	1.tif	0	0	34	2.24033
30	53	22	high	1	1.tif	0	0	32	1.96161
31	53	22	high	1	1.tif	0	0	30	1.80867
32	53	22	high	1	1.tif	0	0	28	1.72279
33	53	22	high	1	1.tif	0	0	26	1.79643
34	53	22	high	1	1.tif	0	0	24	1.48357
35	53	22	high	1	1.tif	0	0	22	1.17925
36	53	22	high	1	1.tif	0	0	20	1.21155
37	53	22	high	1	1.tif	0	0	18	1.264
38	53	22	high	1	1.tif	0	0	16	1.36271
39	53	22	high	1	1.tif	0	0	14	1.33178
40	53	22	high	1	1.tif	0	0	12	1.5876
41	53	22	high	1	1.tif	0	0	10	1.182
42	53	22	high	1	1.tif	0	0	8	1.11621
43	53	22	high	1	1.tif	0	0	6	1.25464
44	53	22	high	1	1.tif	0	0	4	0.938009
45	53	22	high	1	1.tif	0	0	2	1.00632
46	53	22	high	1	1.tif	0	0	1.27222e-13	1.2122
47	53	22	high	1	1.tif	0	0	2	1.14475
48	53	22	high	1	1.tif	0	0	4	1.28795
49	53	22	high	1	1.tif	0	0	6	1.14176
50	53	22	high	1	1.tif	0	0	8	1.37096
51	53	22	high	1	1.tif	0	0	10	1.37991
52	53	22	high	1	1.tif	0	0	12	1.31202
53	53	22	high	1	1.tif	0	0	14	1.22691
54	53	22	high	1	1.tif	0	0	16	1.24824
55	53	22	high	1	1.tif	0	0	18	1.43471
56	53	22	high	1	1.tif	0	0	20	1.43838
57	53	22	high	1	1.tif	0	0	22	1.40696
58	53	22	high	1	1.tif	0	0	24	1.32579
59	53	22	high	1	1.tif	0	0	26	1.32986
60	53	22	high	1	1.tif	0	0	28	1.19616
61	53	22	high	1	1.tif	0	0	30	1.228
62	53	22	high	1	1.tif	0	0	32	1.17276
63	53	22	high	1	1.tif	0	0	34	1.47677
64	53	22	high	1	1.tif	0	0	36	1.53593
65	53	22	high	1	1.tif	0	0	38	1.46119
66	53	22	high	1	1.tif	0	0	40	1.68654
67	53	22	high	1	1.tif	0	0	42	1.39355
68	53	22	high	1	1.tif	0	0	44	1.39216
69	53	22	high	1	1.tif	0	0	46	1.14736
70	53	22	high	1	1.tif	0	0	48	0.963937
71	53	22	high	1	1.tif	0	0	50	1.3278
72	53	22	high	1	1.tif	0	0	52	1.55402
73	53	22	high	1	1.tif	0	0	54	1.85609
74	53	22	high	1	1.tif	0	0	56	1.22651
75	53	22	high	1	1.tif	0	0	58	0.951033
76	53	22	high	1	1.tif	0	0	60	0.884527
77	53	22	high	1	1.tif	0	0	62	0.844633
78	53	22	high	1	1.tif	0	0	64	0.626931
79	53	22	high	1	1.tif	0	0	66	0.552869
80	53	22	high	1	1.tif	0	0	68	0.524745
81	53	22	high	1	1.tif	0	0	70	0.591068
82	53	22	high	1	1.tif	0	0	72	0.489305
83	53	22	high	1	1.tif	0	0	74	0.404468
84	53	22	high	1	1.tif	0	0	76	0.420522
85	53	22	high	1	1.tif	0	0	78	0.477976
86	53	22	high	1	1.tif	0	0	80	0.418017
87	53	22	high	1	1.tif	0	0	82	0.336658
88	53	22	high	1	1.tif	0	0	84	0.326293
89	53	22	high	1	1.tif	0	0	86	0.369372
90	53	22	high	1	1.tif	0	0	88	0.332874
91	53	22	high	2	2.tif	0	0	90	0.455694
92	53	22	high	2	2.tif	0	0	88	0.210156
93	53	22	high	2	2.tif	0	0	86	0.264147
94	53	22	high	2	2.tif	0	0	84	0.250709
95	53	22	high	2	2.tif	0	0	82	0.262244
96	53	22	high	2	2.tif	0	0	80	0.298722
97	53	22	high	2	2.tif	0	0	78	0.351565
98	53	22	high	2	2.tif	0	0	76	0.285639
99	53	22	high	2	2.tif	0	0	74	0.326216
100	53	22	high	2	2.tif	0	0	72	0.386838
101	53	22	high	2	2.tif	0	0	70	0.43625
102	53	22	high	2	2.tif	0	0	68	0.463627
103	53	22	high	2	2.tif	0	0	66	0.452685
104	53	22	high	2	2.tif	0	0	64	0.48554
105	53	22	high	2	2.tif	0	0	62	0.502471
106	53	22	high	2	2.tif	0	0	60	0.619699
107	53	22	high	2	2.tif	0	0	58	0.803116
108	53	22	high	2	2.tif	0	0	56	0.894469
109	53	22	high	2	2.tif	0	0	54	0.977
110	53	22	high	2	2.tif	0	0	52	1.41682
111	53	22	high	2	2.tif	0	0	50	1.5902
112	53	22	high	2	2.tif	0	0	48	1.43332
113	53	22	high	2	2.tif	0	0	46	1.32537
114	53	22	high	2	2.tif	0	0	44	1.22781
115	53	22	high	2	2.tif	0	0	42	1.34227
116	53	22	high	2	2.tif	0	0	40	1.23618
117	53	22	high	2	2.tif	0	0	38	1.24951
118	53	22	high	2	2.tif	0	0	36	1.31741
119	53	22	high	2	2.tif	0	0	34	1.41278
120	53	22	high	2	2.tif	0	0	32	1.53151
121	53	22	high	2	2.tif	0	0	30	1.70582
122	53	22	high	2	2.tif	0	0	28	1.73529
123	53	22	high	2	2.tif	0	0	26	1.55142
124	53	22	high	2	2.tif	0	0	24	1.33161
125	53	22	high	2	2.tif	0	0	22	1.51311
126	53	22	high	2	2.tif	0	0	20	1.53037
127	53	22	high	2	2.tif	0	0	18	1.403
128	53	22	high	2	2.tif	0	0	16	1.25111
129	53	22	high	2	2.tif	0	0	14	1.75519
130	53	22	high	2	2.tif	0	0	12	1.65242
131	53	22	high	2	2.tif	0	0	10	1.9644
132	53	22	high	2	2.tif	0	0	8	3.09779
133	53	22	high	2	2.tif	0	0	6	2.79958
134	53	22	high	2	2.tif	0	0	4	2.09502
135	53	22	high	2	2.tif	0	0	2	2.78659
136	53	22	high	2	2.tif	0	0	1.27222e-13	2.21174
137	53	22	high	2	2.tif	0	0	2	1.59187
138	53	22	high	2	2.tif	0	0	4	2.07988
139	53	22	high	2	2.tif	0	0	6	1.72283
140	53	22	high	2	2.tif	0	0	8	1.59682
141	53	22	high	2	2.tif	0	0	10	2.01696
142	53	22	high	2	2.tif	0	0	12	2.13652
143	53	22	high	2	2.tif	0	0	14	2.11321
144	53	22	high	2	2.tif	0	0	16	1.57844
145	53	22	high	2	2.tif	0	0	18	1.54825
146	53	22	high	2	2.tif	0	0	20	1.66469
147	53	22	high	2	2.tif	0	0	22	1.42027
148	53	22	high	2	2.tif	0	0	24	1.06963
149	53	22	high	2	2.tif	0	0	26	1.07603
150	53	22	high	2	2.tif	0	0	28	0.971614
151	53	22	high	2	2.tif	0	0	30	1.24359
152	53	22	high	2	2.tif	0	0	32	1.38619
153	53	22	high	2	2.tif	0	0	34	1.26073
154	53	22	high	2	2.tif	0	0	36	1.11243
155	53	22	high	2	2.tif	0	0	38	1.15643
156	53	22	high	2	2.tif	0	0	40	1.15244
157	53	22	high	2	2.tif	0	0	42	1.22203
158	53	22	high	2	2.tif	0	0	44	1.46295
159	53	22	high	2	2.tif	0	0	46	1.61284
160	53	22	high	2	2.tif	0	0	48	1.13399
161	53	22	high	2	2.tif	0	0	50	1.12617
162	53	22	high	2	2.tif	0	0	52	1.05936
163	53	22	high	2	2.tif	0	0	54	0.899779
164	53	22	high	2	2.tif	0	0	56	0.845455
165	53	22	high	2	2.tif	0	0	58	0.882809
166	53	22	high	2	2.tif	0	0	60	0.698742
167	53	22	high	2	2.tif	0	0	62	0.620398
168	53	22	high	2	2.tif	0	0	64	0.476866
169	53	22	high	2	2.tif	0	0	66	0.50868
170	53	22	high	2	2.tif	0	0	68	0.439989
171	53	22	high	2	2.tif	0	0	70	0.393846
172	53	22	high	2	2.tif	0	0	72	0.332499
173	53	22	high	2	2.tif	0	0	74	0.316038
174	53	22	high	2	2.tif	0	0	76	0.309016
175	53	22	high	2	2.tif	0	0	78	0.34268
176	53	22	high	2	2.tif	0	0	80	0.307116
177	53	22	high	2	2.tif	0	0	82	0.255239
178	53	22	high	2	2.tif	0	0	84	0.205205
179	53	22	high	2	2.tif	0	0	86	0.204796
180	53	22	high	2	2.tif	0	0	88	0.250271
181	53	22	high	3	1.tif	0	0	90	0.489342
182	53	22	high	3	1.tif	0	0	88	0.420639
183	53	22	high	3	1.tif	0	0	86	0.482088
184	53	22	high	3	1.tif	0	0	84	0.47122
185	53	22	high	3	1.tif	0	0	82	0.482136
186	53	22	high	3	1.tif	0	0	80	0.65788
187	53	22	high	3	1.tif	0	0	78	0.588166
188	53	22	high	3	1.tif	0	0	76	0.578591
189	53	22	high	3	1.tif	0	0	74	0.568947
190	53	22	high	3	1.tif	0	0	72	0.568657
191	53	22	high	3	1.tif	0	0	70	0.762607
192	53	22	high	3	1.tif	0	0	68	0.738921
193	53	22	high	3	1.tif	0	0	66	0.744177
194	53	22	high	3	1.tif	0	0	64	0.839095
195	53	22	high	3	1.tif	0	0	62	0.777595
196	53	22	high	3	1.tif	0	0	60	0.770875
197	53	22	high	3	1.tif	0	0	58	0.902265
198	53	22	high	3	1.tif	0	0	56	1.02976
199	53	22	high	3	1.tif	0	0	54	1.27048
200	53	22	high	3	1.tif	0	0	52	1.3653
201	53	22	high	3	1.tif	0	0	50	1.29803
202	53	22	high	3	1.tif	0	0	48	1.48421
203	53	22	high	3	1.tif	0	0	46	1.79132
204	53	22	high	3	1.tif	0	0	44	1.47121
205	53	22	high	3	1.tif	0	0	42	1.27898
206	53	22	high	3	1.tif	0	0	40	1.1755
207	53	22	high	3	1.tif	0	0	38	1.12239
208	53	22	high	3	1.tif	0	0	36	1.17044
209	53	22	high	3	1.tif	0	0	34	1.02068
210	53	22	high	3	1.tif	0	0	32	1.05098
211	53	22	high	3	1.tif	0	0	30	1.47241
212	53	22	high	3	1.tif	0	0	28	1.67109
213	53	22	high	3	1.tif	0	0	26	1.76298
214	53	22	high	3	1.tif	0	0	24	1.55022
215	53	22	high	3	1.tif	0	0	22	1.50488
216	53	22	high	3	1.tif	0	0	20	1.4846
217	53	22	high	3	1.tif	0	0	18	1.42545
218	53	22	high	3	1.tif	0	0	16	1.55814
219	53	22	high	3	1.tif	0	0	14	1.87255
220	53	22	high	3	1.tif	0	0	12	1.83494
221	53	22	high	3	1.tif	0	0	10	1.78617
222	53	22	high	3	1.tif	0	0	8	1.67498
223	53	22	high	3	1.tif	0	0	6	1.42017
224	53	22	high	3	1.tif	0	0	4	1.00379
225	53	22	high	3	1.tif	0	0	2	1.49466
226	53	22	high	3	1.tif	0	0	1.27222e-13	2.14452
227	53	22	high	3	1.tif	0	0	2	1.68809
228	53	22	high	3	1.tif	0	0	4	1.50692
229	53	22	high	3	1.tif	0	0	6	1.70962
230	53	22	high	3	1.tif	0	0	8	1.58428
231	53	22	high	3	1.tif	0	0	10	1.67224
232	53	22	high	3	1.tif	0	0	12	1.64559
233	53	22	high	3	1.tif	0	0	14	1.46813
234	53	22	high	3	1.tif	0	0	16	1.44365
235	53	22	high	3	1.tif	0	0	18	1.42352
236	53	22	high	3	1.tif	0	0	20	1.49783
237	53	22	high	3	1.tif	0	0	22	1.49617
238	53	22	high	3	1.tif	0	0	24	1.5362
239	53	22	high	3	1.tif	0	0	26	1.3537
240	53	22	high	3	1.tif	0	0	28	1.04577
241	53	22	high	3	1.tif	0	0	30	1.34888
242	53	22	high	3	1.tif	0	0	32	1.13626
243	53	22	high	3	1.tif	0	0	34	0.994282
244	53	22	high	3	1.tif	0	0	36	1.11263
245	53	22	high	3	1.tif	0	0	38	1.20371
246	53	22	high	3	1.tif	0	0	40	1.24202
247	53	22	high	3	1.tif	0	0	42	1.18009
248	53	22	high	3	1.tif	0	0	44	1.18284
249	53	22	high	3	1.tif	0	0	46	1.15422
250	53	22	high	3	1.tif	0	0	48	1.12339
251	53	22	high	3	1.tif	0	0	50	1.41067
252	53	22	high	3	1.tif	0	0	52	1.43508
253	53	22	high	3	1.tif	0	0	54	1.13962
254	53	22	high	3	1.tif	0	0	56	0.905178
255	53	22	high	3	1.tif	0	0	58	0.821083
256	53	22	high	3	1.tif	0	0	60	0.905165
257	53	22	high	3	1.tif	0	0	62	0.731485
258	53	22	high	3	1.tif	0	0	64	0.681015
259	53	22	high	3	1.tif	0	0	66	0.742069
260	53	22	high	3	1.tif	0	0	68	0.677641
261	53	22	high	3	1.tif	0	0	70	0.684359
262	53	22	high	3	1.tif	0	0	72	0.58751
263	53	22	high	3	1.tif	0	0	74	0.513553
264	53	22	high	3	1.tif	0	0	76	0.518327
265	53	22	high	3	1.tif	0	0	78	0.508832
266	53	22	high	3	1.tif	0	0	80	0.364071
267	53	22	high	3	1.tif	0	0	82	0.383535
268	53	22	high	3	1.tif	0	0	84	0.421841
269	53	22	high	3	1.tif	0	0	86	0.40138
270	53	22	high	3	1.tif	0	0	88	0.38356
271	53	22	high	4	2.tif	0	0	90	0.630308
272	53	22	high	4	2.tif	0	0	88	0.381658
273	53	22	high	4	2.tif	0	0	86	0.433994
274	53	22	high	4	2.tif	0	0	84	0.512356
275	53	22	high	4	2.tif	0	0	82	0.580851
276	53	22	high	4	2.tif	0	0	80	0.766387
277	53	22	high	4	2.tif	0	0	78	0.971317
278	53	22	high	4	2.tif	0	0	76	0.968082
279	53	22	high	4	2.tif	0	0	74	1.02954
280	53	22	high	4	2.tif	0	0	72	1.07809
281	53	22	high	4	2.tif	0	0	70	1.09309
282	53	22	high	4	2.tif	0	0	68	1.12723
283	53	22	high	4	2.tif	0	0	66	1.01868
284	53	22	high	4	2.tif	0	0	64	1.0011
285	53	22	high	4	2.tif	0	0	62	1.15553
286	53	22	high	4	2.tif	0	0	60	1.05655
287	53	22	high	4	2.tif	0	0	58	0.855518
288	53	22	high	4	2.tif	0	0	56	0.909668
289	53	22	high	4	2.tif	0	0	54	0.962552
290	53	22	high	4	2.tif	0	0	52	0.961003
291	53	22	high	4	2.tif	0	0	50	1.32365
292	53	22	high	4	2.tif	0	0	48	1.42566
293	53	22	high	4	2.tif	0	0	46	1.55526
294	53	22	high	4	2.tif	0	0	44	1.68561
295	53	22	high	4	2.tif	0	0	42	1.74513
296	53	22	high	4	2.tif	0	0	40	2.23653
297	53	22	high	4	2.tif	0	0	38	1.80802
298	53	22	high	4	2.tif	0	0	36	1.72931
299	53	22	high	4	2.tif	0	0	34	1.334
300	53	22	high	4	2.tif	0	0	32	1.37292
301	53	22	high	4	2.tif	0	0	30	1.25524
302	53	22	high	4	2.tif	0	0	28	1.25954
303	53	22	high	4	2.tif	0	0	26	1.30548
304	53	22	high	4	2.tif	0	0	24	1.28869
305	53	22	high	4	2.tif	0	0	22	1.43872
306	53	22	high	4	2.tif	0	0	20	1.43363
307	53	22	high	4	2.tif	0	0	18	1.52488
308	53	22	high	4	2.tif	0	0	16	2.50744
309	53	22	high	4	2.tif	0	0	14	2.73392
310	53	22	high	4	2.tif	0	0	12	2.33091
311	53	22	high	4	2.tif	0	0	10	1.4957
312	53	22	high	4	2.tif	0	0	8	1.45699
313	53	22	high	4	2.tif	0	0	6	1.45989
314	53	22	high	4	2.tif	0	0	4	1.22964
315	53	22	high	4	2.tif	0	0	2	1.63475
316	53	22	high	4	2.tif	0	0	1.27222e-13	2.0254
317	53	22	high	4	2.tif	0	0	2	1.09501
318	53	22	high	4	2.tif	0	0	4	1.37895
319	53	22	high	4	2.tif	0	0	6	1.18258
320	53	22	high	4	2.tif	0	0	8	1.12355
321	53	22	high	4	2.tif	0	0	10	1.11564
322	53	22	high	4	2.tif	0	0	12	1.10443
323	53	22	high	4	2.tif	0	0	14	1.07639
324	53	22	high	4	2.tif	0	0	16	0.753142
325	53	22	high	4	2.tif	0	0	18	1.06201
326	53	22	high	4	2.tif	0	0	20	0.886029
327	53	22	high	4	2.tif	0	0	22	0.906632
328	53	22	high	4	2.tif	0	0	24	0.721774
329	53	22	high	4	2.tif	0	0	26	0.74421
330	53	22	high	4	2.tif	0	0	28	0.794371
331	53	22	high	4	2.tif	0	0	30	1.01982
332	53	22	high	4	2.tif	0	0	32	1.19237
333	53	22	high	4	2.tif	0	0	34	1.43978
334	53	22	high	4	2.tif	0	0	36	1.5877
335	53	22	high	4	2.tif	0	0	38	1.75146
336	53	22	high	4	2.tif	0	0	40	1.72136
337	53	22	high	4	2.tif	0	0	42	1.2443
338	53	22	high	4	2.tif	0	0	44	1.24347
339	53	22	high	4	2.tif	0	0	46	1.44333
340	53	22	high	4	2.tif	0	0	48	1.26947
341	53	22	high	4	2.tif	0	0	50	1.28958
342	53	22	high	4	2.tif	0	0	52	1.13833
343	53	22	high	4	2.tif	0	0	54	0.976574
344	53	22	high	4	2.tif	0	0	56	0.872035
345	53	22	high	4	2.tif	0	0	58	0.849937
346	53	22	high	4	2.tif	0	0	60	0.601635
347	53	22	high	4	2.tif	0	0	62	0.543489
348	53	22	high	4	2.tif	0	0	64	0.618283
349	53	22	high	4	2.tif	0	0	66	0.582378
350	53	22	high	4	2.tif	0	0	68	0.510847
351	53	22	high	4	2.tif	0	0	70	0.375356
352	53	22	high	4	2.tif	0	0	72	0.373552
353	53	22	high	4	2.tif	0	0	74	0.403016
354	53	22	high	4	2.tif	0	0	76	0.366594
355	53	22	high	4	2.tif	0	0	78	0.51152
356	53	22	high	4	2.tif	0	0	80	0.504185
357	53	22	high	4	2.tif	0	0	82	0.463393
358	53	22	high	4	2.tif	0	0	84	0.38844
359	53	22	high	4	2.tif	0	0	86	0.34405
360	53	22	high	4	2.tif	0	0	88	0.338603
361	53	22	high	5	3.tif	0	0	90	0.496324
362	53	22	high	5	3.tif	0	0	88	0.366849
363	53	22	high	5	3.tif	0	0	86	0.379515
364	53	22	high	5	3.tif	0	0	84	0.415083
365	53	22	high	5	3.tif	0	0	82	0.450714
366	53	22	high	5	3.tif	0	0	80	0.495017
367	53	22	high	5	3.tif	0	0	78	0.56209
368	53	22	high	5	3.tif	0	0	76	0.559622
369	53	22	high	5	3.tif	0	0	74	0.649864
370	53	22	high	5	3.tif	0	0	72	0.67783
371	53	22	high	5	3.tif	0	0	70	0.639567
372	53	22	high	5	3.tif	0	0	68	0.616845
373	53	22	high	5	3.tif	0	0	66	0.760499
374	53	22	high	5	3.tif	0	0	64	0.584306
375	53	22	high	5	3.tif	0	0	62	0.579136
376	53	22	high	5	3.tif	0	0	60	0.686955
377	53	22	high	5	3.tif	0	0	58	0.904911
378	53	22	high	5	3.tif	0	0	56	0.981375
379	53	22	high	5	3.tif	0	0	54	0.898499
380	53	22	high	5	3.tif	0	0	52	1.10544
381	53	22	high	5	3.tif	0	0	50	1.43243
382	53	22	high	5	3.tif	0	0	48	1.73937
383	53	22	high	5	3.tif	0	0	46	2.13656
384	53	22	high	5	3.tif	0	0	44	2.39852
385	53	22	high	5	3.tif	0	0	42	2.54064
386	53	22	high	5	3.tif	0	0	40	2.63119
387	53	22	high	5	3.tif	0	0	38	2.2296
388	53	22	high	5	3.tif	0	0	36	1.69151
389	53	22	high	5	3.tif	0	0	34	1.40054
390	53	22	high	5	3.tif	0	0	32	1.37879
391	53	22	high	5	3.tif	0	0	30	1.18014
392	53	22	high	5	3.tif	0	0	28	0.969081
393	53	22	high	5	3.tif	0	0	26	1.16991
394	53	22	high	5	3.tif	0	0	24	1.44702
395	53	22	high	5	3.tif	0	0	22	1.19629
396	53	22	high	5	3.tif	0	0	20	1.15871
397	53	22	high	5	3.tif	0	0	18	1.01686
398	53	22	high	5	3.tif	0	0	16	1.21655
399	53	22	high	5	3.tif	0	0	14	1.35201
400	53	22	high	5	3.tif	0	0	12	1.70516
401	53	22	high	5	3.tif	0	0	10	1.86873
402	53	22	high	5	3.tif	0	0	8	1.79777
403	53	22	high	5	3.tif	0	0	6	1.81815
404	53	22	high	5	3.tif	0	0	4	1.593
405	53	22	high	5	3.tif	0	0	2	1.85306
406	53	22	high	5	3.tif	0	0	1.27222e-13	2.4367
407	53	22	high	5	3.tif	0	0	2	1.71096
408	53	22	high	5	3.tif	0	0	4	1.58933
409	53	22	high	5	3.tif	0	0	6	1.79214
410	53	22	high	5	3.tif	0	0	8	1.54405
411	53	22	high	5	3.tif	0	0	10	0.951698
412	53	22	high	5	3.tif	0	0	12	0.707603
413	53	22	high	5	3.tif	0	0	14	0.785692
414	53	22	high	5	3.tif	0	0	16	0.836621
415	53	22	high	5	3.tif	0	0	18	0.717296
416	53	22	high	5	3.tif	0	0	20	0.67339
417	53	22	high	5	3.tif	0	0	22	0.757494
418	53	22	high	5	3.tif	0	0	24	0.789781
419	53	22	high	5	3.tif	0	0	26	0.9226
420	53	22	high	5	3.tif	0	0	28	0.776309
421	53	22	high	5	3.tif	0	0	30	0.999434
422	53	22	high	5	3.tif	0	0	32	1.16975
423	53	22	high	5	3.tif	0	0	34	1.16987
424	53	22	high	5	3.tif	0	0	36	1.14205
425	53	22	high	5	3.tif	0	0	38	1.05029
426	53	22	high	5	3.tif	0	0	40	1.16181
427	53	22	high	5	3.tif	0	0	42	1.37054
428	53	22	high	5	3.tif	0	0	44	1.42381
429	53	22	high	5	3.tif	0	0	46	1.5892
430	53	22	high	5	3.tif	0	0	48	1.90465
431	53	22	high	5	3.tif	0	0	50	1.97705
432	53	22	high	5	3.tif	0	0	52	1.65416
433	53	22	high	5	3.tif	0	0	54	1.52577
434	53	22	high	5	3.tif	0	0	56	1.55371
435	53	22	high	5	3.tif	0	0	58	1.20175
436	53	22	high	5	3.tif	0	0	60	1.17341
437	53	22	high	5	3.tif	0	0	62	0.912362
438	53	22	high	5	3.tif	0	0	64	0.721038
439	53	22	high	5	3.tif	0	0	66	0.583842
440	53	22	high	5	3.tif	0	0	68	0.546967
441	53	22	high	5	3.tif	0	0	70	0.562946
442	53	22	high	5	3.tif	0	0	72	0.561108
443	53	22	high	5	3.tif	0	0	74	0.468411
444	53	22	high	5	3.tif	0	0	76	0.44038
445	53	22	high	5	3.tif	0	0	78	0.468638
446	53	22	high	5	3.tif	0	0	80	0.417057
447	53	22	high	5	3.tif	0	0	82	0.368399
448	53	22	high	5	3.tif	0	0	84	0.386107
449	53	22	high	5	3.tif	0	0	86	0.369042
450	53	22	high	5	3.tif	0	0	88	0.402746
451	53	22	low	1	1.tif	0	0	90	0.493783
452	53	22	low	1	1.tif	0	0	88	0.302462
453	53	22	low	1	1.tif	0	0	86	0.333329
454	53	22	low	1	1.tif	0	0	84	0.354481
455	53	22	low	1	1.tif	0	0	82	0.435639
456	53	22	low	1	1.tif	0	0	80	0.475733
457	53	22	low	1	1.tif	0	0	78	0.535244
458	53	22	low	1	1.tif	0	0	76	0.537225
459	53	22	low	1	1.tif	0	0	74	0.71844
460	53	22	low	1	1.tif	0	0	72	0.705585
461	53	22	low	1	1.tif	0	0	70	0.719686
462	53	22	low	1	1.tif	0	0	68	0.830364
463	53	22	low	1	1.tif	0	0	66	0.962409
464	53	22	low	1	1.tif	0	0	64	1.00893
465	53	22	low	1	1.tif	0	0	62	0.850899
466	53	22	low	1	1.tif	0	0	60	1.14452
467	53	22	low	1	1.tif	0	0	58	1.30925
468	53	22	low	1	1.tif	0	0	56	1.16425
469	53	22	low	1	1.tif	0	0	54	1.06881
470	53	22	low	1	1.tif	0	0	52	1.29041
471	53	22	low	1	1.tif	0	0	50	1.34921
472	53	22	low	1	1.tif	0	0	48	1.39321
473	53	22	low	1	1.tif	0	0	46	1.39226
474	53	22	low	1	1.tif	0	0	44	1.76904
475	53	22	low	1	1.tif	0	0	42	1.9052
476	53	22	low	1	1.tif	0	0	40	2.68714
477	53	22	low	1	1.tif	0	0	38	2.75725
478	53	22	low	1	1.tif	0	0	36	2.4216
479	53	22	low	1	1.tif	0	0	34	2.54407
480	53	22	low	1	1.tif	0	0	32	2.6115
481	53	22	low	1	1.tif	0	0	30	2.41689
482	53	22	low	1	1.tif	0	0	28	2.50928
483	53	22	low	1	1.tif	0	0	26	2.2302
484	53	22	low	1	1.tif	0	0	24	2.08227
485	53	22	low	1	1.tif	0	0	22	2.15738
486	53	22	low	1	1.tif	0	0	20	2.23202
487	53	22	low	1	1.tif	0	0	18	2.68405
488	53	22	low	1	1.tif	0	0	16	2.16004
489	53	22	low	1	1.tif	0	0	14	1.60653
490	53	22	low	1	1.tif	0	0	12	1.60379
491	53	22	low	1	1.tif	0	0	10	1.60125
492	53	22	low	1	1.tif	0	0	8	1.3739
493	53	22	low	1	1.tif	0	0	6	1.62274
494	53	22	low	1	1.tif	0	0	4	1.59012
495	53	22	low	1	1.tif	0	0	2	1.44608
496	53	22	low	1	1.tif	0	0	1.27222e-13	1.89296
497	53	22	low	1	1.tif	0	0	2	1.56868
498	53	22	low	1	1.tif	0	0	4	1.59494
499	53	22	low	1	1.tif	0	0	6	1.60982
500	53	22	low	1	1.tif	0	0	8	1.28812
501	53	22	low	1	1.tif	0	0	10	1.10196
502	53	22	low	1	1.tif	0	0	12	1.08883
503	53	22	low	1	1.tif	0	0	14	0.862748
504	53	22	low	1	1.tif	0	0	16	1.01017
505	53	22	low	1	1.tif	0	0	18	0.776831
506	53	22	low	1	1.tif	0	0	20	0.771752
507	53	22	low	1	1.tif	0	0	22	0.749561
508	53	22	low	1	1.tif	0	0	24	0.691053
509	53	22	low	1	1.tif	0	0	26	0.693849
510	53	22	low	1	1.tif	0	0	28	0.905226
511	53	22	low	1	1.tif	0	0	30	0.969932
512	53	22	low	1	1.tif	0	0	32	1.0149
513	53	22	low	1	1.tif	0	0	34	0.828716
514	53	22	low	1	1.tif	0	0	36	0.87128
515	53	22	low	1	1.tif	0	0	38	0.804502
516	53	22	low	1	1.tif	0	0	40	0.937084
517	53	22	low	1	1.tif	0	0	42	0.983261
518	53	22	low	1	1.tif	0	0	44	0.842535
519	53	22	low	1	1.tif	0	0	46	0.858841
520	53	22	low	1	1.tif	0	0	48	0.86391
521	53	22	low	1	1.tif	0	0	50	0.841773
522	53	22	low	1	1.tif	0	0	52	0.701448
523	53	22	low	1	1.tif	0	0	54	0.714711
524	53	22	low	1	1.tif	0	0	56	0.713683
525	53	22	low	1	1.tif	0	0	58	0.563682
526	53	22	low	1	1.tif	0	0	60	0.474359
527	53	22	low	1	1.tif	0	0	62	0.49281
528	53	22	low	1	1.tif	0	0	64	0.452319
529	53	22	low	1	1.tif	0	0	66	0.323182
530	53	22	low	1	1.tif	0	0	68	0.355941
531	53	22	low	1	1.tif	0	0	70	0.396884
532	53	22	low	1	1.tif	0	0	72	0.386404
533	53	22	low	1	1.tif	0	0	74	0.376787
534	53	22	low	1	1.tif	0	0	76	0.328005
535	53	22	low	1	1.tif	0	0	78	0.337487
536	53	22	low	1	1.tif	0	0	80	0.345515
537	53	22	low	1	1.tif	0	0	82	0.322578
538	53	22	low	1	1.tif	0	0	84	0.29291
539	53	22	low	1	1.tif	0	0	86	0.313954
540	53	22	low	1	1.tif	0	0	88	0.295655
541	53	22	low	2	2.tif	0	0	90	0.707008
542	53	22	low	2	2.tif	0	0	88	0.579027
543	53	22	low	2	2.tif	0	0	86	0.671758
544	53	22	low	2	2.tif	0	0	84	0.741974
545	53	22	low	2	2.tif	0	0	82	0.689285
546	53	22	low	2	2.tif	0	0	80	0.694359
547	53	22	low	2	2.tif	0	0	78	0.769706
548	53	22	low	2	2.tif	0	0	76	0.752343
549	53	22	low	2	2.tif	0	0	74	0.644021
550	53	22	low	2	2.tif	0	0	72	0.844047
551	53	22	low	2	2.tif	0	0	70	0.898294
552	53	22	low	2	2.tif	0	0	68	1.08267
553	53	22	low	2	2.tif	0	0	66	1.23841
554	53	22	low	2	2.tif	0	0	64	1.10695
555	53	22	low	2	2.tif	0	0	62	1.00725
556	53	22	low	2	2.tif	0	0	60	1.04064
557	53	22	low	2	2.tif	0	0	58	0.974234
558	53	22	low	2	2.tif	0	0	56	1.04359
559	53	22	low	2	2.tif	0	0	54	0.917988
560	53	22	low	2	2.tif	0	0	52	0.85289
561	53	22	low	2	2.tif	0	0	50	1.08591
562	53	22	low	2	2.tif	0	0	48	1.56112
563	53	22	low	2	2.tif	0	0	46	1.55109
564	53	22	low	2	2.tif	0	0	44	1.67321
565	53	22	low	2	2.tif	0	0	42	2.27731
566	53	22	low	2	2.tif	0	0	40	1.88968
567	53	22	low	2	2.tif	0	0	38	1.27351
568	53	22	low	2	2.tif	0	0	36	1.69068
569	53	22	low	2	2.tif	0	0	34	1.6038
570	53	22	low	2	2.tif	0	0	32	1.55644
571	53	22	low	2	2.tif	0	0	30	2.06509
572	53	22	low	2	2.tif	0	0	28	1.52445
573	53	22	low	2	2.tif	0	0	26	1.45012
574	53	22	low	2	2.tif	0	0	24	1.2542
575	53	22	low	2	2.tif	0	0	22	1.20779
576	53	22	low	2	2.tif	0	0	20	1.34855
577	53	22	low	2	2.tif	0	0	18	1.83123
578	53	22	low	2	2.tif	0	0	16	1.52922
579	53	22	low	2	2.tif	0	0	14	1.26084
580	53	22	low	2	2.tif	0	0	12	1.17056
581	53	22	low	2	2.tif	0	0	10	1.2739
582	53	22	low	2	2.tif	0	0	8	1.17772
583	53	22	low	2	2.tif	0	0	6	1.3528
584	53	22	low	2	2.tif	0	0	4	1.26375
585	53	22	low	2	2.tif	0	0	2	1.17532
586	53	22	low	2	2.tif	0	0	1.27222e-13	1.28387
587	53	22	low	2	2.tif	0	0	2	1.14738
588	53	22	low	2	2.tif	0	0	4	1.00062
589	53	22	low	2	2.tif	0	0	6	0.963378
590	53	22	low	2	2.tif	0	0	8	0.88653
591	53	22	low	2	2.tif	0	0	10	0.910054
592	53	22	low	2	2.tif	0	0	12	1.12327
593	53	22	low	2	2.tif	0	0	14	1.14221
594	53	22	low	2	2.tif	0	0	16	1.12133
595	53	22	low	2	2.tif	0	0	18	1.12717
596	53	22	low	2	2.tif	0	0	20	0.842901
597	53	22	low	2	2.tif	0	0	22	0.830068
598	53	22	low	2	2.tif	0	0	24	0.720437
599	53	22	low	2	2.tif	0	0	26	0.650854
600	53	22	low	2	2.tif	0	0	28	0.665058
601	53	22	low	2	2.tif	0	0	30	1.29355
602	53	22	low	2	2.tif	0	0	32	1.46308
603	53	22	low	2	2.tif	0	0	34	1.59186
604	53	22	low	2	2.tif	0	0	36	1.28585
605	53	22	low	2	2.tif	0	0	38	1.07071
606	53	22	low	2	2.tif	0	0	40	1.33004
607	53	22	low	2	2.tif	0	0	42	1.46443
608	53	22	low	2	2.tif	0	0	44	1.36288
609	53	22	low	2	2.tif	0	0	46	1.24394
610	53	22	low	2	2.tif	0	0	48	1.40736
611	53	22	low	2	2.tif	0	0	50	1.43733
612	53	22	low	2	2.tif	0	0	52	1.15801
613	53	22	low	2	2.tif	0	0	54	1.26195
614	53	22	low	2	2.tif	0	0	56	1.03556
615	53	22	low	2	2.tif	0	0	58	0.883955
616	53	22	low	2	2.tif	0	0	60	1.00563
617	53	22	low	2	2.tif	0	0	62	0.863374
618	53	22	low	2	2.tif	0	0	64	0.821151
619	53	22	low	2	2.tif	0	0	66	0.796815
620	53	22	low	2	2.tif	0	0	68	0.786419
621	53	22	low	2	2.tif	0	0	70	0.823388
622	53	22	low	2	2.tif	0	0	72	0.778466
623	53	22	low	2	2.tif	0	0	74	0.748487
624	53	22	low	2	2.tif	0	0	76	0.817032
625	53	22	low	2	2.tif	0	0	78	0.955753
626	53	22	low	2	2.tif	0	0	80	0.870551
627	53	22	low	2	2.tif	0	0	82	0.746133
628	53	22	low	2	2.tif	0	0	84	0.675094
629	53	22	low	2	2.tif	0	0	86	0.658631
630	53	22	low	2	2.tif	0	0	88	0.642668
631	53	22	low	3	3.tif	0	0	90	0.534245
632	53	22	low	3	3.tif	0	0	88	0.42229
633	53	22	low	3	3.tif	0	0	86	0.536183
634	53	22	low	3	3.tif	0	0	84	0.515758
635	53	22	low	3	3.tif	0	0	82	0.537996
636	53	22	low	3	3.tif	0	0	80	0.564695
637	53	22	low	3	3.tif	0	0	78	0.660385
638	53	22	low	3	3.tif	0	0	76	0.65004
639	53	22	low	3	3.tif	0	0	74	0.727303
640	53	22	low	3	3.tif	0	0	72	0.78109
641	53	22	low	3	3.tif	0	0	70	0.826449
642	53	22	low	3	3.tif	0	0	68	0.841518
643	53	22	low	3	3.tif	0	0	66	0.948634
644	53	22	low	3	3.tif	0	0	64	1.18179
645	53	22	low	3	3.tif	0	0	62	1.24708
646	53	22	low	3	3.tif	0	0	60	1.3459
647	53	22	low	3	3.tif	0	0	58	1.30679
648	53	22	low	3	3.tif	0	0	56	1.16186
649	53	22	low	3	3.tif	0	0	54	1.75661
650	53	22	low	3	3.tif	0	0	52	1.81343
651	53	22	low	3	3.tif	0	0	50	1.39517
652	53	22	low	3	3.tif	0	0	48	1.60499
653	53	22	low	3	3.tif	0	0	46	1.31807
654	53	22	low	3	3.tif	0	0	44	1.4883
655	53	22	low	3	3.tif	0	0	42	1.45863
656	53	22	low	3	3.tif	0	0	40	1.3376
657	53	22	low	3	3.tif	0	0	38	1.12499
658	53	22	low	3	3.tif	0	0	36	1.12749
659	53	22	low	3	3.tif	0	0	34	1.26111
660	53	22	low	3	3.tif	0	0	32	2.06856
661	53	22	low	3	3.tif	0	0	30	1.78146
662	53	22	low	3	3.tif	0	0	28	1.82799
663	53	22	low	3	3.tif	0	0	26	1.49953
664	53	22	low	3	3.tif	0	0	24	1.62611
665	53	22	low	3	3.tif	0	0	22	1.6943
666	53	22	low	3	3.tif	0	0	20	2.05797
667	53	22	low	3	3.tif	0	0	18	1.79293
668	53	22	low	3	3.tif	0	0	16	2.01103
669	53	22	low	3	3.tif	0	0	14	2.07884
670	53	22	low	3	3.tif	0	0	12	2.44591
671	53	22	low	3	3.tif	0	0	10	2.73125
672	53	22	low	3	3.tif	0	0	8	2.47013
673	53	22	low	3	3.tif	0	0	6	2.14461
674	53	22	low	3	3.tif	0	0	4	2.28461
675	53	22	low	3	3.tif	0	0	2	2.23544
676	53	22	low	3	3.tif	0	0	1.27222e-13	2.31497
677	53	22	low	3	3.tif	0	0	2	1.39793
678	53	22	low	3	3.tif	0	0	4	1.02373
679	53	22	low	3	3.tif	0	0	6	0.988061
680	53	22	low	3	3.tif	0	0	8	1.03308
681	53	22	low	3	3.tif	0	0	10	1.05249
682	53	22	low	3	3.tif	0	0	12	1.0473
683	53	22	low	3	3.tif	0	0	14	0.815407
684	53	22	low	3	3.tif	0	0	16	0.803679
685	53	22	low	3	3.tif	0	0	18	0.73804
686	53	22	low	3	3.tif	0	0	20	0.827547
687	53	22	low	3	3.tif	0	0	22	0.800473
688	53	22	low	3	3.tif	0	0	24	0.954167
689	53	22	low	3	3.tif	0	0	26	0.779785
690	53	22	low	3	3.tif	0	0	28	0.743098
691	53	22	low	3	3.tif	0	0	30	0.790171
692	53	22	low	3	3.tif	0	0	32	1.00594
693	53	22	low	3	3.tif	0	0	34	1.11937
694	53	22	low	3	3.tif	0	0	36	1.02891
695	53	22	low	3	3.tif	0	0	38	0.984337
696	53	22	low	3	3.tif	0	0	40	0.897
697	53	22	low	3	3.tif	0	0	42	0.854124
698	53	22	low	3	3.tif	0	0	44	0.811947
699	53	22	low	3	3.tif	0	0	46	0.728738
700	53	22	low	3	3.tif	0	0	48	0.801631
701	53	22	low	3	3.tif	0	0	50	0.71162
702	53	22	low	3	3.tif	0	0	52	0.799946
703	53	22	low	3	3.tif	0	0	54	0.826059
704	53	22	low	3	3.tif	0	0	56	0.676265
705	53	22	low	3	3.tif	0	0	58	0.756449
706	53	22	low	3	3.tif	0	0	60	0.707884
707	53	22	low	3	3.tif	0	0	62	0.755779
708	53	22	low	3	3.tif	0	0	64	0.818234
709	53	22	low	3	3.tif	0	0	66	0.748982
710	53	22	low	3	3.tif	0	0	68	0.672402
711	53	22	low	3	3.tif	0	0	70	0.658331
712	53	22	low	3	3.tif	0	0	72	0.629923
713	53	22	low	3	3.tif	0	0	74	0.609691
714	53	22	low	3	3.tif	0	0	76	0.540882
715	53	22	low	3	3.tif	0	0	78	0.567243
716	53	22	low	3	3.tif	0	0	80	0.4116
717	53	22	low	3	3.tif	0	0	82	0.365461
718	53	22	low	3	3.tif	0	0	84	0.359806
719	53	22	low	3	3.tif	0	0	86	0.397729
720	53	22	low	3	3.tif	0	0	88	0.416725
721	53	22	low	4	4.tif	0	0	90	0.59088
722	53	22	low	4	4.tif	0	0	88	0.360037
723	53	22	low	4	4.tif	0	0	86	0.338037
724	53	22	low	4	4.tif	0	0	84	0.359131
725	53	22	low	4	4.tif	0	0	82	0.437448
726	53	22	low	4	4.tif	0	0	80	0.525915
727	53	22	low	4	4.tif	0	0	78	0.50636
728	53	22	low	4	4.tif	0	0	76	0.434396
729	53	22	low	4	4.tif	0	0	74	0.630444
730	53	22	low	4	4.tif	0	0	72	0.582998
731	53	22	low	4	4.tif	0	0	70	0.615487
732	53	22	low	4	4.tif	0	0	68	0.718418
733	53	22	low	4	4.tif	0	0	66	0.753849
734	53	22	low	4	4.tif	0	0	64	0.666179
735	53	22	low	4	4.tif	0	0	62	0.733569
736	53	22	low	4	4.tif	0	0	60	0.836708
737	53	22	low	4	4.tif	0	0	58	0.775499
738	53	22	low	4	4.tif	0	0	56	0.818109
739	53	22	low	4	4.tif	0	0	54	0.905128
740	53	22	low	4	4.tif	0	0	52	1.19312
741	53	22	low	4	4.tif	0	0	50	1.27776
742	53	22	low	4	4.tif	0	0	48	1.28585
743	53	22	low	4	4.tif	0	0	46	1.3426
744	53	22	low	4	4.tif	0	0	44	1.42739
745	53	22	low	4	4.tif	0	0	42	1.49351
746	53	22	low	4	4.tif	0	0	40	1.53328
747	53	22	low	4	4.tif	0	0	38	1.51409
748	53	22	low	4	4.tif	0	0	36	1.58863
749	53	22	low	4	4.tif	0	0	34	1.7866
750	53	22	low	4	4.tif	0	0	32	1.82873
751	53	22	low	4	4.tif	0	0	30	1.69794
752	53	22	low	4	4.tif	0	0	28	1.76656
753	53	22	low	4	4.tif	0	0	26	1.56247
754	53	22	low	4	4.tif	0	0	24	1.75702
755	53	22	low	4	4.tif	0	0	22	1.85365
756	53	22	low	4	4.tif	0	0	20	1.78756
757	53	22	low	4	4.tif	0	0	18	1.83019
758	53	22	low	4	4.tif	0	0	16	1.68267
759	53	22	low	4	4.tif	0	0	14	1.70525
760	53	22	low	4	4.tif	0	0	12	1.82162
761	53	22	low	4	4.tif	0	0	10	1.6171
762	53	22	low	4	4.tif	0	0	8	1.84681
763	53	22	low	4	4.tif	0	0	6	1.74656
764	53	22	low	4	4.tif	0	0	4	1.86624
765	53	22	low	4	4.tif	0	0	2	1.86995
766	53	22	low	4	4.tif	0	0	1.27222e-13	1.83335
767	53	22	low	4	4.tif	0	0	2	1.59887
768	53	22	low	4	4.tif	0	0	4	1.18022
769	53	22	low	4	4.tif	0	0	6	1.14588
770	53	22	low	4	4.tif	0	0	8	1.02375
771	53	22	low	4	4.tif	0	0	10	0.904488
772	53	22	low	4	4.tif	0	0	12	1.14147
773	53	22	low	4	4.tif	0	0	14	1.26675
774	53	22	low	4	4.tif	0	0	16	1.34335
775	53	22	low	4	4.tif	0	0	18	1.12261
776	53	22	low	4	4.tif	0	0	20	1.16008
777	53	22	low	4	4.tif	0	0	22	1.05307
778	53	22	low	4	4.tif	0	0	24	0.974313
779	53	22	low	4	4.tif	0	0	26	1.17179
780	53	22	low	4	4.tif	0	0	28	1.49714
781	53	22	low	4	4.tif	0	0	30	1.90023
782	53	22	low	4	4.tif	0	0	32	2.08412
783	53	22	low	4	4.tif	0	0	34	1.50375
784	53	22	low	4	4.tif	0	0	36	1.29711
785	53	22	low	4	4.tif	0	0	38	1.26771
786	53	22	low	4	4.tif	0	0	40	1.26371
787	53	22	low	4	4.tif	0	0	42	1.24201
788	53	22	low	4	4.tif	0	0	44	1.19548
789	53	22	low	4	4.tif	0	0	46	1.07978
790	53	22	low	4	4.tif	0	0	48	1.05327
791	53	22	low	4	4.tif	0	0	50	1.06656
792	53	22	low	4	4.tif	0	0	52	1.04886
793	53	22	low	4	4.tif	0	0	54	1.08418
794	53	22	low	4	4.tif	0	0	56	1.00512
795	53	22	low	4	4.tif	0	0	58	0.956716
796	53	22	low	4	4.tif	0	0	60	0.849666
797	53	22	low	4	4.tif	0	0	62	0.717447
798	53	22	low	4	4.tif	0	0	64	0.712393
799	53	22	low	4	4.tif	0	0	66	0.688958
800	53	22	low	4	4.tif	0	0	68	0.599832
801	53	22	low	4	4.tif	0	0	70	0.596129
802	53	22	low	4	4.tif	0	0	72	0.598495
803	53	22	low	4	4.tif	0	0	74	0.548248
804	53	22	low	4	4.tif	0	0	76	0.453711
805	53	22	low	4	4.tif	0	0	78	0.504575
806	53	22	low	4	4.tif	0	0	80	0.45703
807	53	22	low	4	4.tif	0	0	82	0.440194
808	53	22	low	4	4.tif	0	0	84	0.366244
809	53	22	low	4	4.tif	0	0	86	0.363909
810	53	22	low	4	4.tif	0	0	88	0.365723
811	53	22	low	5	5.tif	0	0	90	0.68861
812	53	22	low	5	5.tif	0	0	88	0.477196
813	53	22	low	5	5.tif	0	0	86	0.448426
814	53	22	low	5	5.tif	0	0	84	0.444024
815	53	22	low	5	5.tif	0	0	82	0.433631
816	53	22	low	5	5.tif	0	0	80	0.489725
817	53	22	low	5	5.tif	0	0	78	0.614689
818	53	22	low	5	5.tif	0	0	76	0.492517
819	53	22	low	5	5.tif	0	0	74	0.594771
820	53	22	low	5	5.tif	0	0	72	0.599941
821	53	22	low	5	5.tif	0	0	70	0.652643
822	53	22	low	5	5.tif	0	0	68	0.722362
823	53	22	low	5	5.tif	0	0	66	0.746116
824	53	22	low	5	5.tif	0	0	64	0.832806
825	53	22	low	5	5.tif	0	0	62	0.877559
826	53	22	low	5	5.tif	0	0	60	0.965052
827	53	22	low	5	5.tif	0	0	58	1.00503
828	53	22	low	5	5.tif	0	0	56	0.970991
829	53	22	low	5	5.tif	0	0	54	0.978674
830	53	22	low	5	5.tif	0	0	52	1.12436
831	53	22	low	5	5.tif	0	0	50	1.22654
832	53	22	low	5	5.tif	0	0	48	1.3976
833	53	22	low	5	5.tif	0	0	46	1.11447
834	53	22	low	5	5.tif	0	0	44	1.14377
835	53	22	low	5	5.tif	0	0	42	1.36535
836	53	22	low	5	5.tif	0	0	40	1.12978
837	53	22	low	5	5.tif	0	0	38	1.128
838	53	22	low	5	5.tif	0	0	36	1.33086
839	53	22	low	5	5.tif	0	0	34	1.34006
840	53	22	low	5	5.tif	0	0	32	1.16159
841	53	22	low	5	5.tif	0	0	30	1.07722
842	53	22	low	5	5.tif	0	0	28	1.32015
843	53	22	low	5	5.tif	0	0	26	1.61637
844	53	22	low	5	5.tif	0	0	24	1.89636
845	53	22	low	5	5.tif	0	0	22	1.9962
846	53	22	low	5	5.tif	0	0	20	2.05406
847	53	22	low	5	5.tif	0	0	18	1.78419
848	53	22	low	5	5.tif	0	0	16	1.59937
849	53	22	low	5	5.tif	0	0	14	1.41505
850	53	22	low	5	5.tif	0	0	12	1.44425
851	53	22	low	5	5.tif	0	0	10	1.36761
852	53	22	low	5	5.tif	0	0	8	1.13928
853	53	22	low	5	5.tif	0	0	6	1.10653
854	53	22	low	5	5.tif	0	0	4	1.35508
855	53	22	low	5	5.tif	0	0	2	1.86882
856	53	22	low	5	5.tif	0	0	1.27222e-13	2.9609
857	53	22	low	5	5.tif	0	0	2	2.88258
858	53	22	low	5	5.tif	0	0	4	2.63973
859	53	22	low	5	5.tif	0	0	6	1.60236
860	53	22	low	5	5.tif	0	0	8	1.32195
861	53	22	low	5	5.tif	0	0	10	1.27988
862	53	22	low	5	5.tif	0	0	12	1.16941
863	53	22	low	5	5.tif	0	0	14	0.974383
864	53	22	low	5	5.tif	0	0	16	0.805995
865	53	22	low	5	5.tif	0	0	18	0.925965
866	53	22	low	5	5.tif	0	0	20	1.05091
867	53	22	low	5	5.tif	0	0	22	1.03826
868	53	22	low	5	5.tif	0	0	24	0.989011
869	53	22	low	5	5.tif	0	0	26	1.17502
870	53	22	low	5	5.tif	0	0	28	1.28068
871	53	22	low	5	5.tif	0	0	30	1.37363
872	53	22	low	5	5.tif	0	0	32	1.30165
873	53	22	low	5	5.tif	0	0	34	1.90494
874	53	22	low	5	5.tif	0	0	36	1.98961
875	53	22	low	5	5.tif	0	0	38	1.52337
876	53	22	low	5	5.tif	0	0	40	1.24194
877	53	22	low	5	5.tif	0	0	42	1.04073
878	53	22	low	5	5.tif	0	0	44	0.92098
879	53	22	low	5	5.tif	0	0	46	0.931449
880	53	22	low	5	5.tif	0	0	48	1.12523
881	53	22	low	5	5.tif	0	0	50	1.13008
882	53	22	low	5	5.tif	0	0	52	0.970688
883	53	22	low	5	5.tif	0	0	54	1.07862
884	53	22	low	5	5.tif	0	0	56	1.21564
885	53	22	low	5	5.tif	0	0	58	1.30329
886	53	22	low	5	5.tif	0	0	60	1.11781
887	53	22	low	5	5.tif	0	0	62	0.941694
888	53	22	low	5	5.tif	0	0	64	0.851198
889	53	22	low	5	5.tif	0	0	66	0.786558
890	53	22	low	5	5.tif	0	0	68	0.649077
891	53	22	low	5	5.tif	0	0	70	0.585166
892	53	22	low	5	5.tif	0	0	72	0.552173
893	53	22	low	5	5.tif	0	0	74	0.440632
894	53	22	low	5	5.tif	0	0	76	0.518782
895	53	22	low	5	5.tif	0	0	78	0.600594
896	53	22	low	5	5.tif	0	0	80	0.509899
897	53	22	low	5	5.tif	0	0	82	0.454322
898	53	22	low	5	5.tif	0	0	84	0.420301
899	53	22	low	5	5.tif	0	0	86	0.477149
900	53	22	low	5	5.tif	0	0	88	0.408081
901	53	22	low	6	6.tif	0	0	90	0.6622
902	53	22	low	6	6.tif	0	0	88	0.399116
903	53	22	low	6	6.tif	0	0	86	0.433794
904	53	22	low	6	6.tif	0	0	84	0.497073
905	53	22	low	6	6.tif	0	0	82	0.56202
906	53	22	low	6	6.tif	0	0	80	0.588603
907	53	22	low	6	6.tif	0	0	78	0.595488
908	53	22	low	6	6.tif	0	0	76	0.532138
909	53	22	low	6	6.tif	0	0	74	0.572572
910	53	22	low	6	6.tif	0	0	72	0.608362
911	53	22	low	6	6.tif	0	0	70	0.648843
912	53	22	low	6	6.tif	0	0	68	0.651958
913	53	22	low	6	6.tif	0	0	66	0.733618
914	53	22	low	6	6.tif	0	0	64	0.620005
915	53	22	low	6	6.tif	0	0	62	0.594455
916	53	22	low	6	6.tif	0	0	60	0.53934
917	53	22	low	6	6.tif	0	0	58	0.64947
918	53	22	low	6	6.tif	0	0	56	0.707054
919	53	22	low	6	6.tif	0	0	54	0.843962
920	53	22	low	6	6.tif	0	0	52	0.792294
921	53	22	low	6	6.tif	0	0	50	0.635297
922	53	22	low	6	6.tif	0	0	48	0.761717
923	53	22	low	6	6.tif	0	0	46	0.842851
924	53	22	low	6	6.tif	0	0	44	0.893878
925	53	22	low	6	6.tif	0	0	42	0.992654
926	53	22	low	6	6.tif	0	0	40	0.919185
927	53	22	low	6	6.tif	0	0	38	1.16037
928	53	22	low	6	6.tif	0	0	36	1.00693
929	53	22	low	6	6.tif	0	0	34	1.00765
930	53	22	low	6	6.tif	0	0	32	0.984813
931	53	22	low	6	6.tif	0	0	30	0.945089
932	53	22	low	6	6.tif	0	0	28	1.10547
933	53	22	low	6	6.tif	0	0	26	1.10016
934	53	22	low	6	6.tif	0	0	24	0.983848
935	53	22	low	6	6.tif	0	0	22	1.03658
936	53	22	low	6	6.tif	0	0	20	0.697613
937	53	22	low	6	6.tif	0	0	18	0.841533
938	53	22	low	6	6.tif	0	0	16	0.77159
939	53	22	low	6	6.tif	0	0	14	0.787793
940	53	22	low	6	6.tif	0	0	12	1.04392
941	53	22	low	6	6.tif	0	0	10	1.32999
942	53	22	low	6	6.tif	0	0	8	1.81578
943	53	22	low	6	6.tif	0	0	6	1.48345
944	53	22	low	6	6.tif	0	0	4	1.12734
945	53	22	low	6	6.tif	0	0	2	1.06789
946	53	22	low	6	6.tif	0	0	1.27222e-13	1.71338
947	53	22	low	6	6.tif	0	0	2	1.51587
948	53	22	low	6	6.tif	0	0	4	1.36122
949	53	22	low	6	6.tif	0	0	6	1.27431
950	53	22	low	6	6.tif	0	0	8	1.31079
951	53	22	low	6	6.tif	0	0	10	1.13719
952	53	22	low	6	6.tif	0	0	12	0.975788
953	53	22	low	6	6.tif	0	0	14	0.911785
954	53	22	low	6	6.tif	0	0	16	0.959412
955	53	22	low	6	6.tif	0	0	18	0.941858
956	53	22	low	6	6.tif	0	0	20	0.822965
957	53	22	low	6	6.tif	0	0	22	0.851128
958	53	22	low	6	6.tif	0	0	24	1.10198
959	53	22	low	6	6.tif	0	0	26	0.94631
960	53	22	low	6	6.tif	0	0	28	1.06388
961	53	22	low	6	6.tif	0	0	30	1.44643
962	53	22	low	6	6.tif	0	0	32	1.7083
963	53	22	low	6	6.tif	0	0	34	1.6963
964	53	22	low	6	6.tif	0	0	36	1.79147
965	53	22	low	6	6.tif	0	0	38	2.10325
966	53	22	low	6	6.tif	0	0	40	2.31988
967	53	22	low	6	6.tif	0	0	42	2.39318
968	53	22	low	6	6.tif	0	0	44	2.43902
969	53	22	low	6	6.tif	0	0	46	2.30665
970	53	22	low	6	6.tif	0	0	48	2.4995
971	53	22	low	6	6.tif	0	0	50	2.38979
972	53	22	low	6	6.tif	0	0	52	2.63507
973	53	22	low	6	6.tif	0	0	54	2.49943
974	53	22	low	6	6.tif	0	0	56	2.03822
975	53	22	low	6	6.tif	0	0	58	1.61872
976	53	22	low	6	6.tif	0	0	60	1.53002
977	53	22	low	6	6.tif	0	0	62	1.49498
978	53	22	low	6	6.tif	0	0	64	1.30127
979	53	22	low	6	6.tif	0	0	66	1.00818
980	53	22	low	6	6.tif	0	0	68	0.973911
981	53	22	low	6	6.tif	0	0	70	0.920497
982	53	22	low	6	6.tif	0	0	72	0.8946
983	53	22	low	6	6.tif	0	0	74	0.787776
984	53	22	low	6	6.tif	0	0	76	0.891295
985	53	22	low	6	6.tif	0	0	78	0.872804
986	53	22	low	6	6.tif	0	0	80	0.813423
987	53	22	low	6	6.tif	0	0	82	0.642277
988	53	22	low	6	6.tif	0	0	84	0.572869
989	53	22	low	6	6.tif	0	0	86	0.552183
990	53	22	low	6	6.tif	0	0	88	0.395097
991	53	27	high	1	1.tif	0	0	90	0.713169
992	53	27	high	1	1.tif	0	0	88	0.567289
993	53	27	high	1	1.tif	0	0	86	0.604949
994	53	27	high	1	1.tif	0	0	84	0.563206
995	53	27	high	1	1.tif	0	0	82	0.514909
996	53	27	high	1	1.tif	0	0	80	0.587002
997	53	27	high	1	1.tif	0	0	78	0.565576
998	53	27	high	1	1.tif	0	0	76	0.645388
999	53	27	high	1	1.tif	0	0	74	0.677005
1000	53	27	high	1	1.tif	0	0	72	0.761653
1001	53	27	high	1	1.tif	0	0	70	0.723122
1002	53	27	high	1	1.tif	0	0	68	0.778264
1003	53	27	high	1	1.tif	0	0	66	0.717283
1004	53	27	high	1	1.tif	0	0	64	0.787648
1005	53	27	high	1	1.tif	0	0	62	0.811898
1006	53	27	high	1	1.tif	0	0	60	0.848219
1007	53	27	high	1	1.tif	0	0	58	0.909017
1008	53	27	high	1	1.tif	0	0	56	1.02268
1009	53	27	high	1	1.tif	0	0	54	1.01303
1010	53	27	high	1	1.tif	0	0	52	1.14065
1011	53	27	high	1	1.tif	0	0	50	1.35834
1012	53	27	high	1	1.tif	0	0	48	1.29499
1013	53	27	high	1	1.tif	0	0	46	1.30667
1014	53	27	high	1	1.tif	0	0	44	1.42406
1015	53	27	high	1	1.tif	0	0	42	1.45211
1016	53	27	high	1	1.tif	0	0	40	1.31352
1017	53	27	high	1	1.tif	0	0	38	1.24041
1018	53	27	high	1	1.tif	0	0	36	1.35239
1019	53	27	high	1	1.tif	0	0	34	1.6328
1020	53	27	high	1	1.tif	0	0	32	1.64275
1021	53	27	high	1	1.tif	0	0	30	1.7593
1022	53	27	high	1	1.tif	0	0	28	1.64618
1023	53	27	high	1	1.tif	0	0	26	1.68802
1024	53	27	high	1	1.tif	0	0	24	1.68946
1025	53	27	high	1	1.tif	0	0	22	1.66068
1026	53	27	high	1	1.tif	0	0	20	1.97262
1027	53	27	high	1	1.tif	0	0	18	2.281
1028	53	27	high	1	1.tif	0	0	16	2.08994
1029	53	27	high	1	1.tif	0	0	14	1.78398
1030	53	27	high	1	1.tif	0	0	12	1.6467
1031	53	27	high	1	1.tif	0	0	10	1.36194
1032	53	27	high	1	1.tif	0	0	8	1.22462
1033	53	27	high	1	1.tif	0	0	6	1.21522
1034	53	27	high	1	1.tif	0	0	4	1.31368
1035	53	27	high	1	1.tif	0	0	2	1.32955
1036	53	27	high	1	1.tif	0	0	1.27222e-13	1.74927
1037	53	27	high	1	1.tif	0	0	2	1.58864
1038	53	27	high	1	1.tif	0	0	4	1.44465
1039	53	27	high	1	1.tif	0	0	6	1.28727
1040	53	27	high	1	1.tif	0	0	8	1.49774
1041	53	27	high	1	1.tif	0	0	10	1.47645
1042	53	27	high	1	1.tif	0	0	12	1.36794
1043	53	27	high	1	1.tif	0	0	14	1.06463
1044	53	27	high	1	1.tif	0	0	16	1.09547
1045	53	27	high	1	1.tif	0	0	18	1.20449
1046	53	27	high	1	1.tif	0	0	20	1.29392
1047	53	27	high	1	1.tif	0	0	22	1.48738
1048	53	27	high	1	1.tif	0	0	24	1.23288
1049	53	27	high	1	1.tif	0	0	26	1.15441
1050	53	27	high	1	1.tif	0	0	28	1.00733
1051	53	27	high	1	1.tif	0	0	30	1.04242
1052	53	27	high	1	1.tif	0	0	32	1.09609
1053	53	27	high	1	1.tif	0	0	34	1.22936
1054	53	27	high	1	1.tif	0	0	36	1.22153
1055	53	27	high	1	1.tif	0	0	38	1.14256
1056	53	27	high	1	1.tif	0	0	40	1.2075
1057	53	27	high	1	1.tif	0	0	42	1.17017
1058	53	27	high	1	1.tif	0	0	44	1.11528
1059	53	27	high	1	1.tif	0	0	46	1.07124
1060	53	27	high	1	1.tif	0	0	48	1.18162
1061	53	27	high	1	1.tif	0	0	50	1.10397
1062	53	27	high	1	1.tif	0	0	52	1.1006
1063	53	27	high	1	1.tif	0	0	54	1.10364
1064	53	27	high	1	1.tif	0	0	56	1.07018
1065	53	27	high	1	1.tif	0	0	58	1.01913
1066	53	27	high	1	1.tif	0	0	60	1.07746
1067	53	27	high	1	1.tif	0	0	62	0.823961
1068	53	27	high	1	1.tif	0	0	64	0.65883
1069	53	27	high	1	1.tif	0	0	66	0.658235
1070	53	27	high	1	1.tif	0	0	68	0.620508
1071	53	27	high	1	1.tif	0	0	70	0.631557
1072	53	27	high	1	1.tif	0	0	72	0.56105
1073	53	27	high	1	1.tif	0	0	74	0.529108
1074	53	27	high	1	1.tif	0	0	76	0.567504
1075	53	27	high	1	1.tif	0	0	78	0.547634
1076	53	27	high	1	1.tif	0	0	80	0.540749
1077	53	27	high	1	1.tif	0	0	82	0.581932
1078	53	27	high	1	1.tif	0	0	84	0.558423
1079	53	27	high	1	1.tif	0	0	86	0.579126
1080	53	27	high	1	1.tif	0	0	88	0.603311
1081	53	27	high	2	3.tif	0	0	90	0.807716
1082	53	27	high	2	3.tif	0	0	88	0.569161
1083	53	27	high	2	3.tif	0	0	86	0.655393
1084	53	27	high	2	3.tif	0	0	84	0.780992
1085	53	27	high	2	3.tif	0	0	82	0.803336
1086	53	27	high	2	3.tif	0	0	80	0.755936
1087	53	27	high	2	3.tif	0	0	78	0.622631
1088	53	27	high	2	3.tif	0	0	76	0.822566
1089	53	27	high	2	3.tif	0	0	74	0.809779
1090	53	27	high	2	3.tif	0	0	72	0.693115
1091	53	27	high	2	3.tif	0	0	70	0.774659
1092	53	27	high	2	3.tif	0	0	68	0.647411
1093	53	27	high	2	3.tif	0	0	66	0.644414
1094	53	27	high	2	3.tif	0	0	64	0.832507
1095	53	27	high	2	3.tif	0	0	62	0.996442
1096	53	27	high	2	3.tif	0	0	60	0.885512
1097	53	27	high	2	3.tif	0	0	58	0.901926
1098	53	27	high	2	3.tif	0	0	56	1.0418
1099	53	27	high	2	3.tif	0	0	54	1.47608
1100	53	27	high	2	3.tif	0	0	52	1.37743
1101	53	27	high	2	3.tif	0	0	50	1.35788
1102	53	27	high	2	3.tif	0	0	48	1.3261
1103	53	27	high	2	3.tif	0	0	46	1.35282
1104	53	27	high	2	3.tif	0	0	44	1.23488
1105	53	27	high	2	3.tif	0	0	42	1.16388
1106	53	27	high	2	3.tif	0	0	40	1.17842
1107	53	27	high	2	3.tif	0	0	38	1.29678
1108	53	27	high	2	3.tif	0	0	36	1.39175
1109	53	27	high	2	3.tif	0	0	34	1.05761
1110	53	27	high	2	3.tif	0	0	32	1.01812
1111	53	27	high	2	3.tif	0	0	30	1.32062
1112	53	27	high	2	3.tif	0	0	28	1.32595
1113	53	27	high	2	3.tif	0	0	26	1.22553
1114	53	27	high	2	3.tif	0	0	24	1.13593
1115	53	27	high	2	3.tif	0	0	22	1.43067
1116	53	27	high	2	3.tif	0	0	20	1.0945
1117	53	27	high	2	3.tif	0	0	18	1.03051
1118	53	27	high	2	3.tif	0	0	16	1.13702
1119	53	27	high	2	3.tif	0	0	14	1.39713
1120	53	27	high	2	3.tif	0	0	12	1.3853
1121	53	27	high	2	3.tif	0	0	10	2.01757
1122	53	27	high	2	3.tif	0	0	8	2.18957
1123	53	27	high	2	3.tif	0	0	6	1.76106
1124	53	27	high	2	3.tif	0	0	4	1.69101
1125	53	27	high	2	3.tif	0	0	2	2.07175
1126	53	27	high	2	3.tif	0	0	1.27222e-13	2.23814
1127	53	27	high	2	3.tif	0	0	2	1.81779
1128	53	27	high	2	3.tif	0	0	4	1.70714
1129	53	27	high	2	3.tif	0	0	6	1.77995
1130	53	27	high	2	3.tif	0	0	8	2.02027
1131	53	27	high	2	3.tif	0	0	10	1.82071
1132	53	27	high	2	3.tif	0	0	12	1.90626
1133	53	27	high	2	3.tif	0	0	14	1.6665
1134	53	27	high	2	3.tif	0	0	16	1.51505
1135	53	27	high	2	3.tif	0	0	18	1.82625
1136	53	27	high	2	3.tif	0	0	20	1.38769
1137	53	27	high	2	3.tif	0	0	22	1.61624
1138	53	27	high	2	3.tif	0	0	24	1.38884
1139	53	27	high	2	3.tif	0	0	26	1.08981
1140	53	27	high	2	3.tif	0	0	28	1.05215
1141	53	27	high	2	3.tif	0	0	30	0.861608
1142	53	27	high	2	3.tif	0	0	32	0.823686
1143	53	27	high	2	3.tif	0	0	34	0.935439
1144	53	27	high	2	3.tif	0	0	36	0.944646
1145	53	27	high	2	3.tif	0	0	38	0.994663
1146	53	27	high	2	3.tif	0	0	40	0.904363
1147	53	27	high	2	3.tif	0	0	42	0.912816
1148	53	27	high	2	3.tif	0	0	44	0.865753
1149	53	27	high	2	3.tif	0	0	46	0.961933
1150	53	27	high	2	3.tif	0	0	48	0.888929
1151	53	27	high	2	3.tif	0	0	50	1.06497
1152	53	27	high	2	3.tif	0	0	52	1.35066
1153	53	27	high	2	3.tif	0	0	54	1.00328
1154	53	27	high	2	3.tif	0	0	56	0.899012
1155	53	27	high	2	3.tif	0	0	58	0.738391
1156	53	27	high	2	3.tif	0	0	60	0.741723
1157	53	27	high	2	3.tif	0	0	62	0.774495
1158	53	27	high	2	3.tif	0	0	64	0.725795
1159	53	27	high	2	3.tif	0	0	66	0.717047
1160	53	27	high	2	3.tif	0	0	68	0.707639
1161	53	27	high	2	3.tif	0	0	70	0.619497
1162	53	27	high	2	3.tif	0	0	72	0.572776
1163	53	27	high	2	3.tif	0	0	74	0.572824
1164	53	27	high	2	3.tif	0	0	76	0.658368
1165	53	27	high	2	3.tif	0	0	78	0.61224
1166	53	27	high	2	3.tif	0	0	80	0.515074
1167	53	27	high	2	3.tif	0	0	82	0.544033
1168	53	27	high	2	3.tif	0	0	84	0.665093
1169	53	27	high	2	3.tif	0	0	86	0.550313
1170	53	27	high	2	3.tif	0	0	88	0.548955
1171	53	27	high	3	4.tif	0	0	90	0.657497
1172	53	27	high	3	4.tif	0	0	88	0.492836
1173	53	27	high	3	4.tif	0	0	86	0.673113
1174	53	27	high	3	4.tif	0	0	84	0.712437
1175	53	27	high	3	4.tif	0	0	82	0.751915
1176	53	27	high	3	4.tif	0	0	80	0.833275
1177	53	27	high	3	4.tif	0	0	78	0.902443
1178	53	27	high	3	4.tif	0	0	76	0.938119
1179	53	27	high	3	4.tif	0	0	74	0.843961
1180	53	27	high	3	4.tif	0	0	72	1.06898
1181	53	27	high	3	4.tif	0	0	70	1.14298
1182	53	27	high	3	4.tif	0	0	68	1.13572
1183	53	27	high	3	4.tif	0	0	66	1.09923
1184	53	27	high	3	4.tif	0	0	64	1.09935
1185	53	27	high	3	4.tif	0	0	62	1.17533
1186	53	27	high	3	4.tif	0	0	60	1.23599
1187	53	27	high	3	4.tif	0	0	58	1.21998
1188	53	27	high	3	4.tif	0	0	56	1.23577
1189	53	27	high	3	4.tif	0	0	54	1.32753
1190	53	27	high	3	4.tif	0	0	52	1.28641
1191	53	27	high	3	4.tif	0	0	50	1.12848
1192	53	27	high	3	4.tif	0	0	48	1.31471
1193	53	27	high	3	4.tif	0	0	46	1.5294
1194	53	27	high	3	4.tif	0	0	44	1.38437
1195	53	27	high	3	4.tif	0	0	42	1.21647
1196	53	27	high	3	4.tif	0	0	40	1.05706
1197	53	27	high	3	4.tif	0	0	38	1.21573
1198	53	27	high	3	4.tif	0	0	36	1.28399
1199	53	27	high	3	4.tif	0	0	34	1.09854
1200	53	27	high	3	4.tif	0	0	32	1.08088
1201	53	27	high	3	4.tif	0	0	30	1.19865
1202	53	27	high	3	4.tif	0	0	28	1.18139
1203	53	27	high	3	4.tif	0	0	26	1.31869
1204	53	27	high	3	4.tif	0	0	24	1.30368
1205	53	27	high	3	4.tif	0	0	22	1.40052
1206	53	27	high	3	4.tif	0	0	20	1.38135
1207	53	27	high	3	4.tif	0	0	18	1.16594
1208	53	27	high	3	4.tif	0	0	16	1.10454
1209	53	27	high	3	4.tif	0	0	14	1.15821
1210	53	27	high	3	4.tif	0	0	12	1.18299
1211	53	27	high	3	4.tif	0	0	10	1.21149
1212	53	27	high	3	4.tif	0	0	8	1.30469
1213	53	27	high	3	4.tif	0	0	6	1.09984
1214	53	27	high	3	4.tif	0	0	4	1.0631
1215	53	27	high	3	4.tif	0	0	2	1.50749
1216	53	27	high	3	4.tif	0	0	1.27222e-13	1.77755
1217	53	27	high	3	4.tif	0	0	2	1.35331
1218	53	27	high	3	4.tif	0	0	4	1.38244
1219	53	27	high	3	4.tif	0	0	6	1.43603
1220	53	27	high	3	4.tif	0	0	8	1.61631
1221	53	27	high	3	4.tif	0	0	10	1.51965
1222	53	27	high	3	4.tif	0	0	12	1.33715
1223	53	27	high	3	4.tif	0	0	14	1.56735
1224	53	27	high	3	4.tif	0	0	16	1.48798
1225	53	27	high	3	4.tif	0	0	18	1.35575
1226	53	27	high	3	4.tif	0	0	20	1.30818
1227	53	27	high	3	4.tif	0	0	22	1.21588
1228	53	27	high	3	4.tif	0	0	24	1.13299
1229	53	27	high	3	4.tif	0	0	26	1.13049
1230	53	27	high	3	4.tif	0	0	28	0.879067
1231	53	27	high	3	4.tif	0	0	30	0.984428
1232	53	27	high	3	4.tif	0	0	32	1.11304
1233	53	27	high	3	4.tif	0	0	34	1.08115
1234	53	27	high	3	4.tif	0	0	36	1.08899
1235	53	27	high	3	4.tif	0	0	38	1.05183
1236	53	27	high	3	4.tif	0	0	40	1.21453
1237	53	27	high	3	4.tif	0	0	42	1.25141
1238	53	27	high	3	4.tif	0	0	44	1.34023
1239	53	27	high	3	4.tif	0	0	46	1.22816
1240	53	27	high	3	4.tif	0	0	48	1.27564
1241	53	27	high	3	4.tif	0	0	50	1.50019
1242	53	27	high	3	4.tif	0	0	52	1.22707
1243	53	27	high	3	4.tif	0	0	54	1.28539
1244	53	27	high	3	4.tif	0	0	56	1.01906
1245	53	27	high	3	4.tif	0	0	58	0.821154
1246	53	27	high	3	4.tif	0	0	60	0.887664
1247	53	27	high	3	4.tif	0	0	62	0.788165
1248	53	27	high	3	4.tif	0	0	64	0.819666
1249	53	27	high	3	4.tif	0	0	66	0.813159
1250	53	27	high	3	4.tif	0	0	68	0.897533
1251	53	27	high	3	4.tif	0	0	70	0.812254
1252	53	27	high	3	4.tif	0	0	72	0.680612
1253	53	27	high	3	4.tif	0	0	74	0.595657
1254	53	27	high	3	4.tif	0	0	76	0.623838
1255	53	27	high	3	4.tif	0	0	78	0.763091
1256	53	27	high	3	4.tif	0	0	80	0.736284
1257	53	27	high	3	4.tif	0	0	82	0.769082
1258	53	27	high	3	4.tif	0	0	84	0.699527
1259	53	27	high	3	4.tif	0	0	86	0.745902
1260	53	27	high	3	4.tif	0	0	88	0.660094
1261	53	27	high	4	5.tif	0	0	90	0.599172
1262	53	27	high	4	5.tif	0	0	88	0.339316
1263	53	27	high	4	5.tif	0	0	86	0.374539
1264	53	27	high	4	5.tif	0	0	84	0.445797
1265	53	27	high	4	5.tif	0	0	82	0.393757
1266	53	27	high	4	5.tif	0	0	80	0.420063
1267	53	27	high	4	5.tif	0	0	78	0.551446
1268	53	27	high	4	5.tif	0	0	76	0.561787
1269	53	27	high	4	5.tif	0	0	74	0.621473
1270	53	27	high	4	5.tif	0	0	72	0.519835
1271	53	27	high	4	5.tif	0	0	70	0.464164
1272	53	27	high	4	5.tif	0	0	68	0.486322
1273	53	27	high	4	5.tif	0	0	66	0.548423
1274	53	27	high	4	5.tif	0	0	64	0.521606
1275	53	27	high	4	5.tif	0	0	62	0.580011
1276	53	27	high	4	5.tif	0	0	60	0.611952
1277	53	27	high	4	5.tif	0	0	58	0.762953
1278	53	27	high	4	5.tif	0	0	56	1.01884
1279	53	27	high	4	5.tif	0	0	54	1.07432
1280	53	27	high	4	5.tif	0	0	52	0.970486
1281	53	27	high	4	5.tif	0	0	50	0.966114
1282	53	27	high	4	5.tif	0	0	48	1.22782
1283	53	27	high	4	5.tif	0	0	46	1.53174
1284	53	27	high	4	5.tif	0	0	44	1.5
1285	53	27	high	4	5.tif	0	0	42	1.44193
1286	53	27	high	4	5.tif	0	0	40	1.75699
1287	53	27	high	4	5.tif	0	0	38	1.62106
1288	53	27	high	4	5.tif	0	0	36	1.63329
1289	53	27	high	4	5.tif	0	0	34	1.46129
1290	53	27	high	4	5.tif	0	0	32	1.39832
1291	53	27	high	4	5.tif	0	0	30	1.47579
1292	53	27	high	4	5.tif	0	0	28	1.3186
1293	53	27	high	4	5.tif	0	0	26	1.30629
1294	53	27	high	4	5.tif	0	0	24	1.42469
1295	53	27	high	4	5.tif	0	0	22	1.64702
1296	53	27	high	4	5.tif	0	0	20	1.41265
1297	53	27	high	4	5.tif	0	0	18	1.3903
1298	53	27	high	4	5.tif	0	0	16	1.9204
1299	53	27	high	4	5.tif	0	0	14	1.56819
1300	53	27	high	4	5.tif	0	0	12	1.82619
1301	53	27	high	4	5.tif	0	0	10	1.42056
1302	53	27	high	4	5.tif	0	0	8	1.84342
1303	53	27	high	4	5.tif	0	0	6	1.83179
1304	53	27	high	4	5.tif	0	0	4	1.8621
1305	53	27	high	4	5.tif	0	0	2	1.97619
1306	53	27	high	4	5.tif	0	0	1.27222e-13	2.21347
1307	53	27	high	4	5.tif	0	0	2	1.69695
1308	53	27	high	4	5.tif	0	0	4	1.72927
1309	53	27	high	4	5.tif	0	0	6	1.78707
1310	53	27	high	4	5.tif	0	0	8	1.6627
1311	53	27	high	4	5.tif	0	0	10	1.76846
1312	53	27	high	4	5.tif	0	0	12	1.57918
1313	53	27	high	4	5.tif	0	0	14	1.88672
1314	53	27	high	4	5.tif	0	0	16	1.73946
1315	53	27	high	4	5.tif	0	0	18	1.62848
1316	53	27	high	4	5.tif	0	0	20	1.80964
1317	53	27	high	4	5.tif	0	0	22	1.47898
1318	53	27	high	4	5.tif	0	0	24	1.46208
1319	53	27	high	4	5.tif	0	0	26	1.66121
1320	53	27	high	4	5.tif	0	0	28	1.52076
1321	53	27	high	4	5.tif	0	0	30	1.36904
1322	53	27	high	4	5.tif	0	0	32	1.55255
1323	53	27	high	4	5.tif	0	0	34	1.51385
1324	53	27	high	4	5.tif	0	0	36	1.23794
1325	53	27	high	4	5.tif	0	0	38	1.15522
1326	53	27	high	4	5.tif	0	0	40	1.14025
1327	53	27	high	4	5.tif	0	0	42	1.05382
1328	53	27	high	4	5.tif	0	0	44	1.02524
1329	53	27	high	4	5.tif	0	0	46	1.03507
1330	53	27	high	4	5.tif	0	0	48	0.927322
1331	53	27	high	4	5.tif	0	0	50	0.906626
1332	53	27	high	4	5.tif	0	0	52	0.914615
1333	53	27	high	4	5.tif	0	0	54	0.669883
1334	53	27	high	4	5.tif	0	0	56	0.615011
1335	53	27	high	4	5.tif	0	0	58	0.747918
1336	53	27	high	4	5.tif	0	0	60	0.767353
1337	53	27	high	4	5.tif	0	0	62	0.596981
1338	53	27	high	4	5.tif	0	0	64	0.549061
1339	53	27	high	4	5.tif	0	0	66	0.630313
1340	53	27	high	4	5.tif	0	0	68	0.735555
1341	53	27	high	4	5.tif	0	0	70	0.595091
1342	53	27	high	4	5.tif	0	0	72	0.478334
1343	53	27	high	4	5.tif	0	0	74	0.451563
1344	53	27	high	4	5.tif	0	0	76	0.446997
1345	53	27	high	4	5.tif	0	0	78	0.54262
1346	53	27	high	4	5.tif	0	0	80	0.546308
1347	53	27	high	4	5.tif	0	0	82	0.46404
1348	53	27	high	4	5.tif	0	0	84	0.387679
1349	53	27	high	4	5.tif	0	0	86	0.368473
1350	53	27	high	4	5.tif	0	0	88	0.321881
1351	53	27	high	5	6.tif	0	0	90	0.655512
1352	53	27	high	5	6.tif	0	0	88	0.583253
1353	53	27	high	5	6.tif	0	0	86	0.588207
1354	53	27	high	5	6.tif	0	0	84	0.617204
1355	53	27	high	5	6.tif	0	0	82	0.63935
1356	53	27	high	5	6.tif	0	0	80	0.655707
1357	53	27	high	5	6.tif	0	0	78	0.662064
1358	53	27	high	5	6.tif	0	0	76	0.701321
1359	53	27	high	5	6.tif	0	0	74	0.726232
1360	53	27	high	5	6.tif	0	0	72	0.816702
1361	53	27	high	5	6.tif	0	0	70	0.871368
1362	53	27	high	5	6.tif	0	0	68	1.01016
1363	53	27	high	5	6.tif	0	0	66	0.956516
1364	53	27	high	5	6.tif	0	0	64	0.937754
1365	53	27	high	5	6.tif	0	0	62	0.842117
1366	53	27	high	5	6.tif	0	0	60	1.11366
1367	53	27	high	5	6.tif	0	0	58	1.10622
1368	53	27	high	5	6.tif	0	0	56	1.00436
1369	53	27	high	5	6.tif	0	0	54	1.29542
1370	53	27	high	5	6.tif	0	0	52	1.43518
1371	53	27	high	5	6.tif	0	0	50	1.44001
1372	53	27	high	5	6.tif	0	0	48	1.49252
1373	53	27	high	5	6.tif	0	0	46	1.95043
1374	53	27	high	5	6.tif	0	0	44	2.21382
1375	53	27	high	5	6.tif	0	0	42	1.96179
1376	53	27	high	5	6.tif	0	0	40	1.92991
1377	53	27	high	5	6.tif	0	0	38	1.70166
1378	53	27	high	5	6.tif	0	0	36	1.83239
1379	53	27	high	5	6.tif	0	0	34	1.77496
1380	53	27	high	5	6.tif	0	0	32	1.80639
1381	53	27	high	5	6.tif	0	0	30	1.48664
1382	53	27	high	5	6.tif	0	0	28	1.22975
1383	53	27	high	5	6.tif	0	0	26	1.28895
1384	53	27	high	5	6.tif	0	0	24	1.04695
1385	53	27	high	5	6.tif	0	0	22	1.17808
1386	53	27	high	5	6.tif	0	0	20	1.3531
1387	53	27	high	5	6.tif	0	0	18	1.34872
1388	53	27	high	5	6.tif	0	0	16	1.55953
1389	53	27	high	5	6.tif	0	0	14	1.71518
1390	53	27	high	5	6.tif	0	0	12	1.85592
1391	53	27	high	5	6.tif	0	0	10	2.10254
1392	53	27	high	5	6.tif	0	0	8	1.89578
1393	53	27	high	5	6.tif	0	0	6	1.61899
1394	53	27	high	5	6.tif	0	0	4	1.22962
1395	53	27	high	5	6.tif	0	0	2	1.49364
1396	53	27	high	5	6.tif	0	0	1.27222e-13	1.7411
1397	53	27	high	5	6.tif	0	0	2	1.64677
1398	53	27	high	5	6.tif	0	0	4	1.29541
1399	53	27	high	5	6.tif	0	0	6	1.04211
1400	53	27	high	5	6.tif	0	0	8	0.926853
1401	53	27	high	5	6.tif	0	0	10	0.83315
1402	53	27	high	5	6.tif	0	0	12	0.882365
1403	53	27	high	5	6.tif	0	0	14	0.832001
1404	53	27	high	5	6.tif	0	0	16	0.879273
1405	53	27	high	5	6.tif	0	0	18	0.9825
1406	53	27	high	5	6.tif	0	0	20	0.855194
1407	53	27	high	5	6.tif	0	0	22	0.93764
1408	53	27	high	5	6.tif	0	0	24	0.862034
1409	53	27	high	5	6.tif	0	0	26	0.885512
1410	53	27	high	5	6.tif	0	0	28	0.965738
1411	53	27	high	5	6.tif	0	0	30	1.14931
1412	53	27	high	5	6.tif	0	0	32	1.0262
1413	53	27	high	5	6.tif	0	0	34	1.18022
1414	53	27	high	5	6.tif	0	0	36	1.32405
1415	53	27	high	5	6.tif	0	0	38	1.18795
1416	53	27	high	5	6.tif	0	0	40	1.15187
1417	53	27	high	5	6.tif	0	0	42	1.39317
1418	53	27	high	5	6.tif	0	0	44	1.28779
1419	53	27	high	5	6.tif	0	0	46	1.31453
1420	53	27	high	5	6.tif	0	0	48	1.17755
1421	53	27	high	5	6.tif	0	0	50	1.13039
1422	53	27	high	5	6.tif	0	0	52	1.02069
1423	53	27	high	5	6.tif	0	0	54	1.09652
1424	53	27	high	5	6.tif	0	0	56	0.944666
1425	53	27	high	5	6.tif	0	0	58	0.867629
1426	53	27	high	5	6.tif	0	0	60	0.891652
1427	53	27	high	5	6.tif	0	0	62	0.794594
1428	53	27	high	5	6.tif	0	0	64	0.643418
1429	53	27	high	5	6.tif	0	0	66	0.62224
1430	53	27	high	5	6.tif	0	0	68	0.700084
1431	53	27	high	5	6.tif	0	0	70	0.621825
1432	53	27	high	5	6.tif	0	0	72	0.623045
1433	53	27	high	5	6.tif	0	0	74	0.602302
1434	53	27	high	5	6.tif	0	0	76	0.569193
1435	53	27	high	5	6.tif	0	0	78	0.606164
1436	53	27	high	5	6.tif	0	0	80	0.560654
1437	53	27	high	5	6.tif	0	0	82	0.497009
1438	53	27	high	5	6.tif	0	0	84	0.550887
1439	53	27	high	5	6.tif	0	0	86	0.603134
1440	53	27	high	5	6.tif	0	0	88	0.568035
1441	53	27	low	1	1.tif	0	0	90	0.781867
1442	53	27	low	1	1.tif	0	0	88	0.418387
1443	53	27	low	1	1.tif	0	0	86	0.586127
1444	53	27	low	1	1.tif	0	0	84	0.604579
1445	53	27	low	1	1.tif	0	0	82	0.565654
1446	53	27	low	1	1.tif	0	0	80	0.533131
1447	53	27	low	1	1.tif	0	0	78	0.620421
1448	53	27	low	1	1.tif	0	0	76	0.600367
1449	53	27	low	1	1.tif	0	0	74	0.559819
1450	53	27	low	1	1.tif	0	0	72	0.617703
1451	53	27	low	1	1.tif	0	0	70	0.663417
1452	53	27	low	1	1.tif	0	0	68	0.734263
1453	53	27	low	1	1.tif	0	0	66	1.06064
1454	53	27	low	1	1.tif	0	0	64	0.91247
1455	53	27	low	1	1.tif	0	0	62	0.856455
1456	53	27	low	1	1.tif	0	0	60	0.933304
1457	53	27	low	1	1.tif	0	0	58	1.1653
1458	53	27	low	1	1.tif	0	0	56	0.982984
1459	53	27	low	1	1.tif	0	0	54	1.06544
1460	53	27	low	1	1.tif	0	0	52	1.15804
1461	53	27	low	1	1.tif	0	0	50	1.33604
1462	53	27	low	1	1.tif	0	0	48	1.27739
1463	53	27	low	1	1.tif	0	0	46	1.43087
1464	53	27	low	1	1.tif	0	0	44	1.36905
1465	53	27	low	1	1.tif	0	0	42	1.50878
1466	53	27	low	1	1.tif	0	0	40	1.89284
1467	53	27	low	1	1.tif	0	0	38	2.06179
1468	53	27	low	1	1.tif	0	0	36	1.81055
1469	53	27	low	1	1.tif	0	0	34	1.43788
1470	53	27	low	1	1.tif	0	0	32	1.81536
1471	53	27	low	1	1.tif	0	0	30	1.94214
1472	53	27	low	1	1.tif	0	0	28	2.04048
1473	53	27	low	1	1.tif	0	0	26	1.67924
1474	53	27	low	1	1.tif	0	0	24	1.37845
1475	53	27	low	1	1.tif	0	0	22	1.60549
1476	53	27	low	1	1.tif	0	0	20	1.48701
1477	53	27	low	1	1.tif	0	0	18	1.76558
1478	53	27	low	1	1.tif	0	0	16	1.68795
1479	53	27	low	1	1.tif	0	0	14	1.33234
1480	53	27	low	1	1.tif	0	0	12	1.35577
1481	53	27	low	1	1.tif	0	0	10	1.36411
1482	53	27	low	1	1.tif	0	0	8	1.56296
1483	53	27	low	1	1.tif	0	0	6	1.95265
1484	53	27	low	1	1.tif	0	0	4	1.87694
1485	53	27	low	1	1.tif	0	0	2	1.77361
1486	53	27	low	1	1.tif	0	0	1.27222e-13	2.41605
1487	53	27	low	1	1.tif	0	0	2	1.69151
1488	53	27	low	1	1.tif	0	0	4	1.33158
1489	53	27	low	1	1.tif	0	0	6	1.26616
1490	53	27	low	1	1.tif	0	0	8	1.19048
1491	53	27	low	1	1.tif	0	0	10	1.22986
1492	53	27	low	1	1.tif	0	0	12	1.16378
1493	53	27	low	1	1.tif	0	0	14	0.84374
1494	53	27	low	1	1.tif	0	0	16	1.04056
1495	53	27	low	1	1.tif	0	0	18	0.976712
1496	53	27	low	1	1.tif	0	0	20	1.06594
1497	53	27	low	1	1.tif	0	0	22	1.26982
1498	53	27	low	1	1.tif	0	0	24	1.30132
1499	53	27	low	1	1.tif	0	0	26	1.46159
1500	53	27	low	1	1.tif	0	0	28	1.23209
1501	53	27	low	1	1.tif	0	0	30	0.983128
1502	53	27	low	1	1.tif	0	0	32	0.976144
1503	53	27	low	1	1.tif	0	0	34	0.89273
1504	53	27	low	1	1.tif	0	0	36	0.921933
1505	53	27	low	1	1.tif	0	0	38	1.05073
1506	53	27	low	1	1.tif	0	0	40	1.18524
1507	53	27	low	1	1.tif	0	0	42	1.34204
1508	53	27	low	1	1.tif	0	0	44	1.21032
1509	53	27	low	1	1.tif	0	0	46	1.33887
1510	53	27	low	1	1.tif	0	0	48	1.17968
1511	53	27	low	1	1.tif	0	0	50	0.971073
1512	53	27	low	1	1.tif	0	0	52	0.922407
1513	53	27	low	1	1.tif	0	0	54	0.911562
1514	53	27	low	1	1.tif	0	0	56	0.78414
1515	53	27	low	1	1.tif	0	0	58	0.703429
1516	53	27	low	1	1.tif	0	0	60	0.71939
1517	53	27	low	1	1.tif	0	0	62	0.597565
1518	53	27	low	1	1.tif	0	0	64	0.544144
1519	53	27	low	1	1.tif	0	0	66	0.75745
1520	53	27	low	1	1.tif	0	0	68	0.729348
1521	53	27	low	1	1.tif	0	0	70	0.718235
1522	53	27	low	1	1.tif	0	0	72	0.614417
1523	53	27	low	1	1.tif	0	0	74	0.578387
1524	53	27	low	1	1.tif	0	0	76	0.653228
1525	53	27	low	1	1.tif	0	0	78	0.596005
1526	53	27	low	1	1.tif	0	0	80	0.641108
1527	53	27	low	1	1.tif	0	0	82	0.442337
1528	53	27	low	1	1.tif	0	0	84	0.389804
1529	53	27	low	1	1.tif	0	0	86	0.486812
1530	53	27	low	1	1.tif	0	0	88	0.511548
1531	53	27	low	2	2.tif	0	0	90	0.946504
1532	53	27	low	2	2.tif	0	0	88	0.614776
1533	53	27	low	2	2.tif	0	0	86	0.585357
1534	53	27	low	2	2.tif	0	0	84	0.604108
1535	53	27	low	2	2.tif	0	0	82	0.611994
1536	53	27	low	2	2.tif	0	0	80	0.690291
1537	53	27	low	2	2.tif	0	0	78	0.774993
1538	53	27	low	2	2.tif	0	0	76	0.70249
1539	53	27	low	2	2.tif	0	0	74	0.792449
1540	53	27	low	2	2.tif	0	0	72	0.886793
1541	53	27	low	2	2.tif	0	0	70	1.01016
1542	53	27	low	2	2.tif	0	0	68	1.19824
1543	53	27	low	2	2.tif	0	0	66	1.22275
1544	53	27	low	2	2.tif	0	0	64	1.13666
1545	53	27	low	2	2.tif	0	0	62	1.47962
1546	53	27	low	2	2.tif	0	0	60	1.43319
1547	53	27	low	2	2.tif	0	0	58	1.19201
1548	53	27	low	2	2.tif	0	0	56	1.12436
1549	53	27	low	2	2.tif	0	0	54	1.44303
1550	53	27	low	2	2.tif	0	0	52	1.26047
1551	53	27	low	2	2.tif	0	0	50	1.05267
1552	53	27	low	2	2.tif	0	0	48	1.00792
1553	53	27	low	2	2.tif	0	0	46	1.28407
1554	53	27	low	2	2.tif	0	0	44	1.55988
1555	53	27	low	2	2.tif	0	0	42	1.37944
1556	53	27	low	2	2.tif	0	0	40	1.13408
1557	53	27	low	2	2.tif	0	0	38	1.19636
1558	53	27	low	2	2.tif	0	0	36	1.05344
1559	53	27	low	2	2.tif	0	0	34	1.20807
1560	53	27	low	2	2.tif	0	0	32	1.14193
1561	53	27	low	2	2.tif	0	0	30	0.911843
1562	53	27	low	2	2.tif	0	0	28	0.763655
1563	53	27	low	2	2.tif	0	0	26	0.85791
1564	53	27	low	2	2.tif	0	0	24	0.871297
1565	53	27	low	2	2.tif	0	0	22	0.961711
1566	53	27	low	2	2.tif	0	0	20	1.14642
1567	53	27	low	2	2.tif	0	0	18	1.2592
1568	53	27	low	2	2.tif	0	0	16	1.3897
1569	53	27	low	2	2.tif	0	0	14	1.33394
1570	53	27	low	2	2.tif	0	0	12	1.57081
1571	53	27	low	2	2.tif	0	0	10	1.66815
1572	53	27	low	2	2.tif	0	0	8	1.28365
1573	53	27	low	2	2.tif	0	0	6	0.988071
1574	53	27	low	2	2.tif	0	0	4	1.03573
1575	53	27	low	2	2.tif	0	0	2	1.3
1576	53	27	low	2	2.tif	0	0	1.27222e-13	1.35956
1577	53	27	low	2	2.tif	0	0	2	1.13478
1578	53	27	low	2	2.tif	0	0	4	1.21063
1579	53	27	low	2	2.tif	0	0	6	1.22984
1580	53	27	low	2	2.tif	0	0	8	0.949073
1581	53	27	low	2	2.tif	0	0	10	1.17601
1582	53	27	low	2	2.tif	0	0	12	1.41743
1583	53	27	low	2	2.tif	0	0	14	1.81666
1584	53	27	low	2	2.tif	0	0	16	1.61412
1585	53	27	low	2	2.tif	0	0	18	1.59574
1586	53	27	low	2	2.tif	0	0	20	1.54284
1587	53	27	low	2	2.tif	0	0	22	1.17368
1588	53	27	low	2	2.tif	0	0	24	1.1089
1589	53	27	low	2	2.tif	0	0	26	1.18745
1590	53	27	low	2	2.tif	0	0	28	1.20083
1591	53	27	low	2	2.tif	0	0	30	0.957522
1592	53	27	low	2	2.tif	0	0	32	1.12882
1593	53	27	low	2	2.tif	0	0	34	1.07643
1594	53	27	low	2	2.tif	0	0	36	1.17217
1595	53	27	low	2	2.tif	0	0	38	1.3033
1596	53	27	low	2	2.tif	0	0	40	1.43473
1597	53	27	low	2	2.tif	0	0	42	1.38105
1598	53	27	low	2	2.tif	0	0	44	1.0607
1599	53	27	low	2	2.tif	0	0	46	1.07746
1600	53	27	low	2	2.tif	0	0	48	0.99388
1601	53	27	low	2	2.tif	0	0	50	1.2062
1602	53	27	low	2	2.tif	0	0	52	1.22914
1603	53	27	low	2	2.tif	0	0	54	1.18256
1604	53	27	low	2	2.tif	0	0	56	1.09239
1605	53	27	low	2	2.tif	0	0	58	1.2037
1606	53	27	low	2	2.tif	0	0	60	1.32615
1607	53	27	low	2	2.tif	0	0	62	1.57889
1608	53	27	low	2	2.tif	0	0	64	1.21267
1609	53	27	low	2	2.tif	0	0	66	0.971312
1610	53	27	low	2	2.tif	0	0	68	0.795377
1611	53	27	low	2	2.tif	0	0	70	0.693728
1612	53	27	low	2	2.tif	0	0	72	0.754977
1613	53	27	low	2	2.tif	0	0	74	0.738077
1614	53	27	low	2	2.tif	0	0	76	0.711263
1615	53	27	low	2	2.tif	0	0	78	0.862395
1616	53	27	low	2	2.tif	0	0	80	0.877106
1617	53	27	low	2	2.tif	0	0	82	0.845238
1618	53	27	low	2	2.tif	0	0	84	0.893631
1619	53	27	low	2	2.tif	0	0	86	0.723686
1620	53	27	low	2	2.tif	0	0	88	0.727719
1621	53	27	low	3	3.tif	0	0	90	0.875573
1622	53	27	low	3	3.tif	0	0	88	0.622447
1623	53	27	low	3	3.tif	0	0	86	0.668029
1624	53	27	low	3	3.tif	0	0	84	0.680577
1625	53	27	low	3	3.tif	0	0	82	0.792516
1626	53	27	low	3	3.tif	0	0	80	0.909796
1627	53	27	low	3	3.tif	0	0	78	1.07529
1628	53	27	low	3	3.tif	0	0	76	0.960174
1629	53	27	low	3	3.tif	0	0	74	1.31571
1630	53	27	low	3	3.tif	0	0	72	1.43267
1631	53	27	low	3	3.tif	0	0	70	1.6611
1632	53	27	low	3	3.tif	0	0	68	1.80017
1633	53	27	low	3	3.tif	0	0	66	1.71957
1634	53	27	low	3	3.tif	0	0	64	1.60773
1635	53	27	low	3	3.tif	0	0	62	1.7679
1636	53	27	low	3	3.tif	0	0	60	1.65305
1637	53	27	low	3	3.tif	0	0	58	1.39764
1638	53	27	low	3	3.tif	0	0	56	1.57856
1639	53	27	low	3	3.tif	0	0	54	1.64204
1640	53	27	low	3	3.tif	0	0	52	1.67191
1641	53	27	low	3	3.tif	0	0	50	1.58912
1642	53	27	low	3	3.tif	0	0	48	1.54091
1643	53	27	low	3	3.tif	0	0	46	1.69451
1644	53	27	low	3	3.tif	0	0	44	1.56214
1645	53	27	low	3	3.tif	0	0	42	1.50838
1646	53	27	low	3	3.tif	0	0	40	1.52013
1647	53	27	low	3	3.tif	0	0	38	1.4287
1648	53	27	low	3	3.tif	0	0	36	1.51429
1649	53	27	low	3	3.tif	0	0	34	1.64563
1650	53	27	low	3	3.tif	0	0	32	1.78726
1651	53	27	low	3	3.tif	0	0	30	1.7392
1652	53	27	low	3	3.tif	0	0	28	1.39418
1653	53	27	low	3	3.tif	0	0	26	1.34324
1654	53	27	low	3	3.tif	0	0	24	1.58838
1655	53	27	low	3	3.tif	0	0	22	1.72158
1656	53	27	low	3	3.tif	0	0	20	1.28717
1657	53	27	low	3	3.tif	0	0	18	1.069
1658	53	27	low	3	3.tif	0	0	16	1.34734
1659	53	27	low	3	3.tif	0	0	14	1.28016
1660	53	27	low	3	3.tif	0	0	12	1.30774
1661	53	27	low	3	3.tif	0	0	10	1.25186
1662	53	27	low	3	3.tif	0	0	8	1.01204
1663	53	27	low	3	3.tif	0	0	6	0.997087
1664	53	27	low	3	3.tif	0	0	4	1.04414
1665	53	27	low	3	3.tif	0	0	2	0.980877
1666	53	27	low	3	3.tif	0	0	1.27222e-13	1.25416
1667	53	27	low	3	3.tif	0	0	2	0.82269
1668	53	27	low	3	3.tif	0	0	4	1.05395
1669	53	27	low	3	3.tif	0	0	6	0.951278
1670	53	27	low	3	3.tif	0	0	8	0.808381
1671	53	27	low	3	3.tif	0	0	10	0.803828
1672	53	27	low	3	3.tif	0	0	12	0.829116
1673	53	27	low	3	3.tif	0	0	14	0.691709
1674	53	27	low	3	3.tif	0	0	16	0.693058
1675	53	27	low	3	3.tif	0	0	18	0.686207
1676	53	27	low	3	3.tif	0	0	20	0.711244
1677	53	27	low	3	3.tif	0	0	22	0.834314
1678	53	27	low	3	3.tif	0	0	24	0.777228
1679	53	27	low	3	3.tif	0	0	26	0.764527
1680	53	27	low	3	3.tif	0	0	28	0.851151
1681	53	27	low	3	3.tif	0	0	30	0.724415
1682	53	27	low	3	3.tif	0	0	32	0.890841
1683	53	27	low	3	3.tif	0	0	34	0.943507
1684	53	27	low	3	3.tif	0	0	36	1.00326
1685	53	27	low	3	3.tif	0	0	38	0.962482
1686	53	27	low	3	3.tif	0	0	40	0.850768
1687	53	27	low	3	3.tif	0	0	42	1.08633
1688	53	27	low	3	3.tif	0	0	44	1.31902
1689	53	27	low	3	3.tif	0	0	46	1.08
1690	53	27	low	3	3.tif	0	0	48	0.926107
1691	53	27	low	3	3.tif	0	0	50	0.904582
1692	53	27	low	3	3.tif	0	0	52	1.01712
1693	53	27	low	3	3.tif	0	0	54	0.912031
1694	53	27	low	3	3.tif	0	0	56	0.873304
1695	53	27	low	3	3.tif	0	0	58	0.955965
1696	53	27	low	3	3.tif	0	0	60	0.937402
1697	53	27	low	3	3.tif	0	0	62	1.05651
1698	53	27	low	3	3.tif	0	0	64	1.0506
1699	53	27	low	3	3.tif	0	0	66	0.946005
1700	53	27	low	3	3.tif	0	0	68	0.996848
1701	53	27	low	3	3.tif	0	0	70	0.804246
1702	53	27	low	3	3.tif	0	0	72	0.678416
1703	53	27	low	3	3.tif	0	0	74	0.729267
1704	53	27	low	3	3.tif	0	0	76	0.620633
1705	53	27	low	3	3.tif	0	0	78	0.817287
1706	53	27	low	3	3.tif	0	0	80	0.810831
1707	53	27	low	3	3.tif	0	0	82	0.687129
1708	53	27	low	3	3.tif	0	0	84	0.682833
1709	53	27	low	3	3.tif	0	0	86	0.630935
1710	53	27	low	3	3.tif	0	0	88	0.580986
1711	53	27	low	4	4.tif	0	0	90	0.715331
1712	53	27	low	4	4.tif	0	0	88	0.658024
1713	53	27	low	4	4.tif	0	0	86	0.736326
1714	53	27	low	4	4.tif	0	0	84	0.732579
1715	53	27	low	4	4.tif	0	0	82	0.7179
1716	53	27	low	4	4.tif	0	0	80	0.819686
1717	53	27	low	4	4.tif	0	0	78	0.904209
1718	53	27	low	4	4.tif	0	0	76	1.0617
1719	53	27	low	4	4.tif	0	0	74	1.33497
1720	53	27	low	4	4.tif	0	0	72	1.54162
1721	53	27	low	4	4.tif	0	0	70	1.51342
1722	53	27	low	4	4.tif	0	0	68	1.15407
1723	53	27	low	4	4.tif	0	0	66	1.31312
1724	53	27	low	4	4.tif	0	0	64	1.48098
1725	53	27	low	4	4.tif	0	0	62	1.65301
1726	53	27	low	4	4.tif	0	0	60	1.60209
1727	53	27	low	4	4.tif	0	0	58	1.55255
1728	53	27	low	4	4.tif	0	0	56	1.95492
1729	53	27	low	4	4.tif	0	0	54	2.19902
1730	53	27	low	4	4.tif	0	0	52	1.91854
1731	53	27	low	4	4.tif	0	0	50	1.61751
1732	53	27	low	4	4.tif	0	0	48	1.5956
1733	53	27	low	4	4.tif	0	0	46	1.85526
1734	53	27	low	4	4.tif	0	0	44	1.95342
1735	53	27	low	4	4.tif	0	0	42	1.67952
1736	53	27	low	4	4.tif	0	0	40	2.07411
1737	53	27	low	4	4.tif	0	0	38	2.13249
1738	53	27	low	4	4.tif	0	0	36	1.35223
1739	53	27	low	4	4.tif	0	0	34	1.361
1740	53	27	low	4	4.tif	0	0	32	1.46686
1741	53	27	low	4	4.tif	0	0	30	1.33555
1742	53	27	low	4	4.tif	0	0	28	1.21982
1743	53	27	low	4	4.tif	0	0	26	1.23271
1744	53	27	low	4	4.tif	0	0	24	1.28576
1745	53	27	low	4	4.tif	0	0	22	1.09295
1746	53	27	low	4	4.tif	0	0	20	1.1838
1747	53	27	low	4	4.tif	0	0	18	0.997828
1748	53	27	low	4	4.tif	0	0	16	0.739
1749	53	27	low	4	4.tif	0	0	14	0.847553
1750	53	27	low	4	4.tif	0	0	12	0.910019
1751	53	27	low	4	4.tif	0	0	10	0.934019
1752	53	27	low	4	4.tif	0	0	8	1.04154
1753	53	27	low	4	4.tif	0	0	6	1.06559
1754	53	27	low	4	4.tif	0	0	4	0.992985
1755	53	27	low	4	4.tif	0	0	2	0.999202
1756	53	27	low	4	4.tif	0	0	1.27222e-13	0.874487
1757	53	27	low	4	4.tif	0	0	2	0.730848
1758	53	27	low	4	4.tif	0	0	4	0.796423
1759	53	27	low	4	4.tif	0	0	6	0.739247
1760	53	27	low	4	4.tif	0	0	8	0.759812
1761	53	27	low	4	4.tif	0	0	10	0.856114
1762	53	27	low	4	4.tif	0	0	12	1.00933
1763	53	27	low	4	4.tif	0	0	14	0.8597
1764	53	27	low	4	4.tif	0	0	16	0.89379
1765	53	27	low	4	4.tif	0	0	18	1.00137
1766	53	27	low	4	4.tif	0	0	20	0.978175
1767	53	27	low	4	4.tif	0	0	22	0.993762
1768	53	27	low	4	4.tif	0	0	24	0.940712
1769	53	27	low	4	4.tif	0	0	26	0.929768
1770	53	27	low	4	4.tif	0	0	28	0.884496
1771	53	27	low	4	4.tif	0	0	30	1.03172
1772	53	27	low	4	4.tif	0	0	32	1.27219
1773	53	27	low	4	4.tif	0	0	34	1.05759
1774	53	27	low	4	4.tif	0	0	36	0.976714
1775	53	27	low	4	4.tif	0	0	38	1.08634
1776	53	27	low	4	4.tif	0	0	40	1.18764
1777	53	27	low	4	4.tif	0	0	42	1.22072
1778	53	27	low	4	4.tif	0	0	44	1.07959
1779	53	27	low	4	4.tif	0	0	46	1.27824
1780	53	27	low	4	4.tif	0	0	48	1.22684
1781	53	27	low	4	4.tif	0	0	50	1.44015
1782	53	27	low	4	4.tif	0	0	52	1.31155
1783	53	27	low	4	4.tif	0	0	54	0.987317
1784	53	27	low	4	4.tif	0	0	56	0.866951
1785	53	27	low	4	4.tif	0	0	58	0.962309
1786	53	27	low	4	4.tif	0	0	60	0.74059
1787	53	27	low	4	4.tif	0	0	62	0.96441
1788	53	27	low	4	4.tif	0	0	64	0.992434
1789	53	27	low	4	4.tif	0	0	66	0.801827
1790	53	27	low	4	4.tif	0	0	68	0.827459
1791	53	27	low	4	4.tif	0	0	70	0.855943
1792	53	27	low	4	4.tif	0	0	72	0.622189
1793	53	27	low	4	4.tif	0	0	74	0.629864
1794	53	27	low	4	4.tif	0	0	76	0.76118
1795	53	27	low	4	4.tif	0	0	78	0.737811
1796	53	27	low	4	4.tif	0	0	80	0.581517
1797	53	27	low	4	4.tif	0	0	82	0.690249
1798	53	27	low	4	4.tif	0	0	84	0.673435
1799	53	27	low	4	4.tif	0	0	86	0.673033
1800	53	27	low	4	4.tif	0	0	88	0.683792
1801	53	27	low	5	5.tif	0	0	90	1.14292
1802	53	27	low	5	5.tif	0	0	88	0.730429
1803	53	27	low	5	5.tif	0	0	86	0.681491
1804	53	27	low	5	5.tif	0	0	84	0.714415
1805	53	27	low	5	5.tif	0	0	82	0.802861
1806	53	27	low	5	5.tif	0	0	80	1.02752
1807	53	27	low	5	5.tif	0	0	78	1.24785
1808	53	27	low	5	5.tif	0	0	76	1.01959
1809	53	27	low	5	5.tif	0	0	74	1.22438
1810	53	27	low	5	5.tif	0	0	72	1.54961
1811	53	27	low	5	5.tif	0	0	70	1.59001
1812	53	27	low	5	5.tif	0	0	68	1.75944
1813	53	27	low	5	5.tif	0	0	66	1.93499
1814	53	27	low	5	5.tif	0	0	64	1.55458
1815	53	27	low	5	5.tif	0	0	62	1.40593
1816	53	27	low	5	5.tif	0	0	60	1.23052
1817	53	27	low	5	5.tif	0	0	58	1.3258
1818	53	27	low	5	5.tif	0	0	56	1.46406
1819	53	27	low	5	5.tif	0	0	54	1.3707
1820	53	27	low	5	5.tif	0	0	52	1.37019
1821	53	27	low	5	5.tif	0	0	50	1.28032
1822	53	27	low	5	5.tif	0	0	48	1.10105
1823	53	27	low	5	5.tif	0	0	46	1.07397
1824	53	27	low	5	5.tif	0	0	44	0.917561
1825	53	27	low	5	5.tif	0	0	42	0.917051
1826	53	27	low	5	5.tif	0	0	40	1.05101
1827	53	27	low	5	5.tif	0	0	38	1.18025
1828	53	27	low	5	5.tif	0	0	36	1.14677
1829	53	27	low	5	5.tif	0	0	34	1.03196
1830	53	27	low	5	5.tif	0	0	32	0.942835
1831	53	27	low	5	5.tif	0	0	30	0.873077
1832	53	27	low	5	5.tif	0	0	28	0.940226
1833	53	27	low	5	5.tif	0	0	26	1.01153
1834	53	27	low	5	5.tif	0	0	24	1.01983
1835	53	27	low	5	5.tif	0	0	22	1.26732
1836	53	27	low	5	5.tif	0	0	20	1.07882
1837	53	27	low	5	5.tif	0	0	18	0.980491
1838	53	27	low	5	5.tif	0	0	16	0.89486
1839	53	27	low	5	5.tif	0	0	14	0.909887
1840	53	27	low	5	5.tif	0	0	12	1.00484
1841	53	27	low	5	5.tif	0	0	10	1.0153
1842	53	27	low	5	5.tif	0	0	8	1.00072
1843	53	27	low	5	5.tif	0	0	6	0.955455
1844	53	27	low	5	5.tif	0	0	4	0.902581
1845	53	27	low	5	5.tif	0	0	2	1.02541
1846	53	27	low	5	5.tif	0	0	1.27222e-13	1.4447
1847	53	27	low	5	5.tif	0	0	2	1.30493
1848	53	27	low	5	5.tif	0	0	4	1.40867
1849	53	27	low	5	5.tif	0	0	6	1.17428
1850	53	27	low	5	5.tif	0	0	8	1.05855
1851	53	27	low	5	5.tif	0	0	10	1.21972
1852	53	27	low	5	5.tif	0	0	12	1.38307
1853	53	27	low	5	5.tif	0	0	14	1.35258
1854	53	27	low	5	5.tif	0	0	16	1.1183
1855	53	27	low	5	5.tif	0	0	18	0.951372
1856	53	27	low	5	5.tif	0	0	20	0.896766
1857	53	27	low	5	5.tif	0	0	22	0.930791
1858	53	27	low	5	5.tif	0	0	24	0.822575
1859	53	27	low	5	5.tif	0	0	26	0.891523
1860	53	27	low	5	5.tif	0	0	28	0.929558
1861	53	27	low	5	5.tif	0	0	30	0.707326
1862	53	27	low	5	5.tif	0	0	32	0.730131
1863	53	27	low	5	5.tif	0	0	34	0.826594
1864	53	27	low	5	5.tif	0	0	36	1.0091
1865	53	27	low	5	5.tif	0	0	38	0.907064
1866	53	27	low	5	5.tif	0	0	40	1.0693
1867	53	27	low	5	5.tif	0	0	42	1.05356
1868	53	27	low	5	5.tif	0	0	44	1.03378
1869	53	27	low	5	5.tif	0	0	46	1.36095
1870	53	27	low	5	5.tif	0	0	48	1.12307
1871	53	27	low	5	5.tif	0	0	50	1.14023
1872	53	27	low	5	5.tif	0	0	52	1.21962
1873	53	27	low	5	5.tif	0	0	54	1.27705
1874	53	27	low	5	5.tif	0	0	56	1.20437
1875	53	27	low	5	5.tif	0	0	58	1.40489
1876	53	27	low	5	5.tif	0	0	60	1.60344
1877	53	27	low	5	5.tif	0	0	62	1.16206
1878	53	27	low	5	5.tif	0	0	64	0.954969
1879	53	27	low	5	5.tif	0	0	66	1.19878
1880	53	27	low	5	5.tif	0	0	68	1.03963
1881	53	27	low	5	5.tif	0	0	70	1.24264
1882	53	27	low	5	5.tif	0	0	72	1.38072
1883	53	27	low	5	5.tif	0	0	74	1.06263
1884	53	27	low	5	5.tif	0	0	76	1.10675
1885	53	27	low	5	5.tif	0	0	78	1.08465
1886	53	27	low	5	5.tif	0	0	80	1.00895
1887	53	27	low	5	5.tif	0	0	82	0.926886
1888	53	27	low	5	5.tif	0	0	84	0.915111
1889	53	27	low	5	5.tif	0	0	86	0.861375
1890	53	27	low	5	5.tif	0	0	88	0.826598
1891	53	27	low	6	6.tif	0	0	90	0.950154
1892	53	27	low	6	6.tif	0	0	88	0.590718
1893	53	27	low	6	6.tif	0	0	86	0.633816
1894	53	27	low	6	6.tif	0	0	84	0.809641
1895	53	27	low	6	6.tif	0	0	82	0.872321
1896	53	27	low	6	6.tif	0	0	80	0.853791
1897	53	27	low	6	6.tif	0	0	78	0.890079
1898	53	27	low	6	6.tif	0	0	76	0.842112
1899	53	27	low	6	6.tif	0	0	74	0.879039
1900	53	27	low	6	6.tif	0	0	72	0.819634
1901	53	27	low	6	6.tif	0	0	70	0.848112
1902	53	27	low	6	6.tif	0	0	68	1.07647
1903	53	27	low	6	6.tif	0	0	66	0.859522
1904	53	27	low	6	6.tif	0	0	64	0.77496
1905	53	27	low	6	6.tif	0	0	62	0.829897
1906	53	27	low	6	6.tif	0	0	60	0.92746
1907	53	27	low	6	6.tif	0	0	58	0.957942
1908	53	27	low	6	6.tif	0	0	56	1.17534
1909	53	27	low	6	6.tif	0	0	54	1.47509
1910	53	27	low	6	6.tif	0	0	52	1.44053
1911	53	27	low	6	6.tif	0	0	50	1.69819
1912	53	27	low	6	6.tif	0	0	48	1.83536
1913	53	27	low	6	6.tif	0	0	46	1.58603
1914	53	27	low	6	6.tif	0	0	44	1.58174
1915	53	27	low	6	6.tif	0	0	42	1.4116
1916	53	27	low	6	6.tif	0	0	40	1.48067
1917	53	27	low	6	6.tif	0	0	38	1.61342
1918	53	27	low	6	6.tif	0	0	36	1.37235
1919	53	27	low	6	6.tif	0	0	34	1.36123
1920	53	27	low	6	6.tif	0	0	32	1.58771
1921	53	27	low	6	6.tif	0	0	30	1.16435
1922	53	27	low	6	6.tif	0	0	28	1.20271
1923	53	27	low	6	6.tif	0	0	26	1.04552
1924	53	27	low	6	6.tif	0	0	24	1.02394
1925	53	27	low	6	6.tif	0	0	22	1.11781
1926	53	27	low	6	6.tif	0	0	20	0.941344
1927	53	27	low	6	6.tif	0	0	18	1.00907
1928	53	27	low	6	6.tif	0	0	16	0.883652
1929	53	27	low	6	6.tif	0	0	14	0.832788
1930	53	27	low	6	6.tif	0	0	12	0.992976
1931	53	27	low	6	6.tif	0	0	10	0.923762
1932	53	27	low	6	6.tif	0	0	8	0.895573
1933	53	27	low	6	6.tif	0	0	6	0.897315
1934	53	27	low	6	6.tif	0	0	4	0.959429
1935	53	27	low	6	6.tif	0	0	2	1.01644
1936	53	27	low	6	6.tif	0	0	1.27222e-13	1.66213
1937	53	27	low	6	6.tif	0	0	2	1.50355
1938	53	27	low	6	6.tif	0	0	4	1.19165
1939	53	27	low	6	6.tif	0	0	6	1.1482
1940	53	27	low	6	6.tif	0	0	8	1.12451
1941	53	27	low	6	6.tif	0	0	10	1.04198
1942	53	27	low	6	6.tif	0	0	12	1.13003
1943	53	27	low	6	6.tif	0	0	14	1.14691
1944	53	27	low	6	6.tif	0	0	16	0.967379
1945	53	27	low	6	6.tif	0	0	18	1.06785
1946	53	27	low	6	6.tif	0	0	20	1.17285
1947	53	27	low	6	6.tif	0	0	22	1.44711
1948	53	27	low	6	6.tif	0	0	24	1.28403
1949	53	27	low	6	6.tif	0	0	26	1.11681
1950	53	27	low	6	6.tif	0	0	28	1.02081
1951	53	27	low	6	6.tif	0	0	30	1.1467
1952	53	27	low	6	6.tif	0	0	32	1.11948
1953	53	27	low	6	6.tif	0	0	34	1.26492
1954	53	27	low	6	6.tif	0	0	36	1.33699
1955	53	27	low	6	6.tif	0	0	38	1.71806
1956	53	27	low	6	6.tif	0	0	40	1.61257
1957	53	27	low	6	6.tif	0	0	42	1.3114
1958	53	27	low	6	6.tif	0	0	44	1.3385
1959	53	27	low	6	6.tif	0	0	46	1.46114
1960	53	27	low	6	6.tif	0	0	48	1.29699
1961	53	27	low	6	6.tif	0	0	50	1.38382
1962	53	27	low	6	6.tif	0	0	52	1.83489
1963	53	27	low	6	6.tif	0	0	54	1.37122
1964	53	27	low	6	6.tif	0	0	56	1.25289
1965	53	27	low	6	6.tif	0	0	58	1.15623
1966	53	27	low	6	6.tif	0	0	60	1.08313
1967	53	27	low	6	6.tif	0	0	62	0.935403
1968	53	27	low	6	6.tif	0	0	64	0.735886
1969	53	27	low	6	6.tif	0	0	66	0.804006
1970	53	27	low	6	6.tif	0	0	68	0.898835
1971	53	27	low	6	6.tif	0	0	70	0.843017
1972	53	27	low	6	6.tif	0	0	72	0.891799
1973	53	27	low	6	6.tif	0	0	74	0.884624
1974	53	27	low	6	6.tif	0	0	76	0.73138
1975	53	27	low	6	6.tif	0	0	78	1.04208
1976	53	27	low	6	6.tif	0	0	80	0.90115
1977	53	27	low	6	6.tif	0	0	82	0.737272
1978	53	27	low	6	6.tif	0	0	84	0.692264
1979	53	27	low	6	6.tif	0	0	86	0.654771
1980	53	27	low	6	6.tif	0	0	88	0.591186

## Sheet: Figure 6-fs2E
	experiment	das	phosphorus	plant	aq	area	convexhull	depth	width	circularity	ar	round	solidity	feret	feret_angle	massX	massY	shoot_area
1	53	22	high	1	1.tif	3.59876	63.024	13.6364	6.43579	0.703919	1.99487	0.501285	0.995851	13.7008	84.4395	0	6.26036	2.672
2	53	22	high	2	2.tif	2.20365	51.6186	11.1977	8.13853	0.719122	1.62062	0.617049	0.995003	11.2711	83.4573	0	5.21708	2.037
3	53	22	high	3	1.tif	4.42312	43.0956	12.0924	4.89177	0.657766	2.39213	0.418038	0.995117	12.0961	88.5645	0	5.86683	2.223
4	53	22	high	4	2.tif	1.59334	22.3003	8.90332	3.41991	0.627653	2.50595	0.399051	0.993336	8.91529	92.9689	0	4.33519	1.023
5	53	22	high	5	3.tif	3.85758	57.0502	13.7807	6.78211	0.617105	2.07257	0.482492	0.99518	13.7837	91.1997	0	5.92138	1.946
6	53	22	low	1	1.tif	2.26986	75.0323	12.5974	10.3463	0.770069	1.27517	0.784211	0.996137	12.8595	78.4127	0	5.73956	0.677
7	53	22	low	2	2.tif	2.42249	59.2674	9.68254	8.90332	0.787781	1.23988	0.806527	0.995906	10.2975	142.745	0	5.06154	0.79
8	53	22	low	3	3.tif	3.47424	88.7417	15.5988	10.1443	0.678256	1.66382	0.601025	0.996253	15.6695	84.5572	0	7.22098	1.134
9	53	22	low	4	4.tif	2.41416	52.5742	13.0014	6.36364	0.620939	2.10077	0.476017	0.995309	13.0676	84.2327	0	5.44435	0.65
10	53	22	low	5	5.tif	1.81843	36.6462	10.4329	5.65656	0.660038	1.88223	0.531285	0.994482	10.5064	83.2166	0	4.80001	0.592
11	53	22	low	6	6.tif	2.37273	42.2901	9.50938	6.92641	0.788232	1.42325	0.702619	0.9951	9.74624	77.3424	0	4.35057	0.673
12	53	27	high	1	1.tif	5.32224	102.399	15.2958	8.58586	0.763243	1.77626	0.56298	0.997121	15.5792	79.0543	0	7.14899	4.754
13	53	27	high	2	3.tif	4.93806	72.1757	12.6263	7.84993	0.795834	1.64431	0.608159	0.996158	12.7869	80.9097	0	6.18242	4.342
14	53	27	high	3	4.tif	9.24083	74.0303	13.8095	7.35931	0.75429	1.7932	0.557661	0.996101	13.8115	89.0422	0	6.56403	3.669
15	53	27	high	4	5.tif	1.89131	32.5939	9.89899	4.68975	0.689786	2.09882	0.476458	0.994321	9.90408	88.1632	0	4.94625	2.222
16	53	27	high	5	6.tif	4.63051	90.4137	16.2626	8.2684	0.697358	1.97522	0.506272	0.996553	16.3385	95.5243	0	7.36963	3.895
17	53	27	low	1	1.tif	2.06768	94.8268	14.9928	10.1876	0.723605	1.51418	0.660422	0.99666	15.1061	82.9768	0	6.37193	1.328
18	53	27	low	2	2.tif	2.28007	87.2068	11.7027	10.0577	0.868784	1.12713	0.887208	0.996857	11.9146	79.18	0	5.5946	1.432
19	53	27	low	3	3.tif	3.06195	112.536	17.4315	10.7071	0.697021	1.64035	0.609627	0.996827	17.5837	82.4551	0	7.88885	1.943
20	53	27	low	4	4.tif	6.45582	100.272	14.9062	9.82684	0.743575	1.67353	0.597539	0.996773	15.1091	80.6007	0	7.07927	1.221
21	53	27	low	5	5.tif	1.70224	67.2564	13.1313	7.96537	0.716683	1.63779	0.610581	0.99595	13.1912	95.4611	0	5.79613	0.933
22	53	27	low	6	6.tif	1.78636	67.5803	11.039	10.1587	0.803743	1.14712	0.871748	0.99587	11.1717	81.1582	0	5.09973	0.979
