# Supplementary material for: GLO-Roots: an imaging platform enabling multidimensional characterization of soil-grown root systems
Source: eLife journal article supplement (doi:10.7554/elife.07597), 2015-08-19
Supplement: supp [file elife_poa_e07597_Figure_1_source_data_2.xls]

## Sheet: Figure1-fs1 a,b
Target	Tissue	growth_system	sampling_time	ABI1	ACHT5	AHK2	AOS	ARF19	AtD14 (Dwarf 14)	ATERF-4	AtPAL2	CAB2	CCA1	CHS_p1	CIPK8	COP1	COR15a	CRF5	CRF6	CYP38	CYP710A1	CYP79F1	DBE	DFR	DIM	DWF4	ELIP	EMF1	EPS1	ERD10	ERD7	ETR2	FAF2	FEI1	FER	FIT1	FLA10	FLS1_p1	FLS2	GLK2	GST6	HY5	IAA2	IRT1	JIN1	LBD16	LHY	LPR1	MAX2
M_D_R_1	root	MS	day	1.8701	2.62464	2.19625	4.35026	4.27496	3.4003	3.63149	-0.849565	6.03323	3.18834	1.36489	2.34063	4.94725	6.83475	3.84935	4.14251	3.49558	3.686	13.2047	5.65918	4.29698	1.08009	3.83135	6.27919	5.66647	6.15611	3.80983	1.19712	5.4307	8.64308	1.35447	1.37685	-0.923421	2.59512	0.920575	8.72556	3.82102	-2.55472	1.12984	2.6359	-2.31587	0.843591	6.64755	-0.580254	5.00223	4.95885
M_D_R_2	root	MS	day	1.49948	2.29893	3.02002	4.51951	4.77921	2.90699	3.55908	-0.206112	11.0795	3.61668	0.904168	2.30518	5.11781	10.4145	3.6443	4.6083	4.00005	3.34088	9.44956	5.9081	7.9639	1.23869	4.17825	6.1431	5.10417	6.61723	3.32238	1.0153	6.13661	9.30973	1.3557	1.52648	-0.862011	2.68603	0.372274	9.89096	4.24023	-2.60859	0.971886	2.97864	1.44842	0.891982	7.49184	-0.239224	4.6903	5.47866
M_D_R_3	root	MS	day	1.60289	2.53612	2.87401	4.73957	4.28178	2.8239	3.92723	-0.214614	10.2305	3.68697	1.33954	2.40724	4.82929	9.51286	3.63037	4.47388	4.16716	3.18883	9.39411	5.66734	9.01455	1.02185	4.10561	6.1185	5.13003	5.97187	3.56606	1.34072	6.70893	8.31127	1.3357	1.49233	-0.799621	2.21885	0.6166	10.0761	4.53368	-2.91417	1.66112	3.25274	-0.253291	0.872264	7.05085	-0.208127	4.7103	5.43453
M_N_R_1	root	MS	night	1.06386	2.50319	2.98851	4.21508	4.61728	2.48984	3.80273	-2.00203	11.1372	8.02691	-2.15755	1.54713	3.82323	3.90053	3.62361	3.95682	2.96517	3.40143	11.0513	6.13192	3.04426	1.04426	3.93058	2.38444	5.46428	6.36193	2.98627	0.069921	6.07065	10.1421	1.21233	1.57257	-0.671907	1.68872	-3.53153	12.0036	3.87625	-2.66725	-0.398808	1.76347	2.38456	0.646674	8.1748	4.01996	2.15156	4.32474
M_N_R_2	root	MS	night	0.9506	2.08433	3.31966	4.39851	4.53215	2.41374	3.39287	-2.00664	10.4463	9.28147	-1.8932	2.05904	4.59154	3.85511	3.72432	4.71104	3.3132	3.43319	13.0668	5.96991	2.15817	1.41317	3.74796	2.15756	5.25632	6.25102	2.42207	0.337379	6.78801	9.2651	1.24295	1.33087	-0.496465	2.09641	-3.21041	11.3503	4.58421	-2.55572	-0.63424	2.29546	4.08776	0.807227	7.57495	3.41132	2.08627	5.38023
M_N_R_3	root	MS	night	0.959666	2.38393	2.70444	5.09324	5.21467	2.42126	4.33227	-1.52204	9.87143	7.02849	-1.24435	2.46249	4.14434	5.01506	4.01917	5.54707	3.45708	4.17238	11.4303	7.18139	4.64662	1.51857	3.87465	2.66447	7.5642	6.94663	2.95555	0.404423	7.77328	10.3291	1.40054	2.30993	-1.4521	2.17013	-2.99438	10.6551	5.10634	-2.48999	-0.636885	2.33853	-0.361055	0.562668	8.69131	3.74355	2.66653	5.16481
M.25_N_R_1	root	MS25	night	0.670919	1.70559	2.29317	4.37586	4.6073	2.28368	2.80128	-2.08681	10.1732	7.13569	-2.22036	1.76643	3.51379	7.48006	3.39315	3.99604	3.46235	2.18169	13.3008	6.49349	6.88602	0.976667	3.4607	1.90962	5.30503	6.34899	2.56307	0.143742	5.2021	8.85423	0.926951	1.64417	-0.469999	1.89926	-3.68742	10.1473	4.84351	-3.65082	-0.915129	2.48345	1.42152	-0.131601	6.9322	4.00901	2.3031	4.5091
M.25_N_R_2	root	MS25	night	0.715797	1.63992	2.45998	4.28881	4.39092	2.02659	3.11501	-2.20862	9.62186	7.70973	-2.5677	1.53411	4.48287	4.76718	3.49147	4.07581	3.13201	2.93203	16.4185	5.50993	3.7647	0.85899	3.69186	1.76602	4.6861	5.47461	2.72119	-0.0506121	5.11783	8.13539	0.909635	0.914966	-0.0237246	1.88514	-3.60488	8.55212	4.22977	-3.10567	-0.730415	2.10186	1.04069	0.495339	8.1259	3.28519	1.83826	4.23883
M.25_N_R_3	root	MS25	night	0.533876	1.39425	3.14514	4.4427	4.57116	1.61911	3.10018	-2.1665	10.8203	7.97692	-2.05494	1.64894	4.76591	9.26883	3.89289	4.1663	3.94598	2.41827	16.1468	5.88863	8.67366	1.35717	3.52219	2.35457	5.21104	6.46678	1.96695	-0.0773066	6.2966	10.9713	1.11653	0.924205	-0.489029	2.43037	-3.28078	11.2143	4.73844	-2.76486	-0.523683	2.32039	3.40408	0.709642	7.70906	3.17653	2.30972	4.71704
P_D_R_1	root	pot	day	1.49471	1.69752	1.58093	3.41557	3.76842	3.21618	2.49039	-0.192348	10.8256	4.55017	8.09976	2.15957	5.27198	8.8586	3.40297	4.53909	5.62172	4.5625	8.59336	5.92099	14.3771	0.477606	3.42177	10.8921	5.78189	5.83482	4.53791	0.970708	2.76953	8.40129	1.54946	0.946097	-1.68986	2.76503	6.56402	7.59536	5.40466	-3.12496	2.6644	2.30067	-2.2073	-0.51156	5.85749	0.363247	6.17141	5.3777
P_D_R_2	root	pot	day	1.40473	1.71131	1.52606	4.21854	4.44737	4.29461	3.27301	0.290155	8.97345	4.32707	7.73846	2.38513	5.21019	8.36531	3.49361	4.5621	5.98222	3.60534	8.18309	7.06879	13.8838	0.668736	3.39612	10.3989	5.30438	6.66843	4.31007	1.2718	3.13612	8.59541	1.18226	1.379	-1.5584	3.12613	6.78291	8.65614	5.76711	-3.04996	2.85865	2.69485	-0.707216	-0.237051	6.71208	0.467143	5.88511	5.91314
P_D_R_3	root	pot	day	1.3963	1.67343	1.64405	3.85709	3.95084	3.56116	3.03601	-0.189018	11.5011	3.32572	10.6789	2.01371	5.65408	11.431	3.37444	4.59909	5.39455	4.02115	9.24828	6.18199	9.34345	0.223984	3.46088	13.4645	4.53994	6.37536	4.34341	0.745811	2.70898	8.46856	1.06314	0.735534	-1.68649	3.39281	6.51382	8.76393	5.19425	-2.94168	2.85127	2.44077	-1.61091	0.106355	6.53283	0.490467	6.48151	5.71669
P_N_R_1	root	pot	night	0.934706	1.54359	1.32248	3.11089	3.87445	3.50051	2.70651	-1.01684	10.7791	6.83114	8.18524	1.94094	5.01244	8.81209	3.47842	4.63656	5.2059	3.54467	7.52509	5.2377	14.3306	-0.0140515	3.16841	10.8456	5.25772	6.24105	4.34594	0.603081	2.42408	8.72694	1.06768	0.771125	-1.78534	2.70566	8.19701	9.36562	5.18852	-3.62579	2.24086	1.93662	-2.86501	-0.424728	5.80521	2.15091	6.04721	5.67111
P_N_R_2	root	pot	night	0.938473	1.76283	1.41061	3.62688	3.7448	4.05049	2.82591	-0.551615	10.3347	5.87384	7.74078	2.65199	4.8096	8.36763	4.06674	5.76255	5.73048	4.83218	9.09109	6.23603	13.8861	0.249131	3.75602	10.4012	5.20634	6.8138	4.10014	0.779042	2.40462	8.321	1.04479	1.41824	-1.6401	2.1902	8.07038	8.85145	5.54646	-3.23066	2.37579	1.72481	-2.04528	-0.234575	6.11939	2.07054	6.95277	5.85496
P_N_R_3	root	pot	night	1.24743	1.7882	1.0301	2.89367	3.8735	3.38316	2.69043	-0.924692	11.1577	5.63858	8.39118	2.0773	4.71794	9.19064	3.13749	4.49895	5.02128	3.89891	7.89712	7.43283	14.7091	0.519918	3.11937	11.2242	5.37838	6.32042	4.32988	0.654907	2.90733	8.71305	1.01944	0.914119	-2.10597	2.73312	6.21056	9.60125	5.54505	-3.37866	2.39929	1.99614	-2.39251	-0.546049	7.11407	2.2528	7.83834	5.39287
R_D_R_1	root	rhizotron	day	1.05508	1.48623	1.72441	4.29698	4.7492	3.21709	2.8574	0.022432	9.50024	5.20969	6.90636	2.5101	4.14298	7.53321	3.65919	5.03878	6.09782	3.39109	9.90435	5.41487	13.0517	0.172031	2.85213	9.56675	6.03267	5.36493	4.14786	0.873014	6.94265	9.14835	1.30486	1.11495	-1.53298	3.05813	6.52385	9.47435	5.70946	-3.49969	1.94737	2.50648	-0.470487	-0.776984	8.42815	0.12437	5.99315	5.35533
R_D_R_2	root	rhizotron	day	1.12861	1.55105	1.34799	4.2051	4.21475	2.95915	3.15002	0.103092	8.24652	3.83126	6.44353	2.18586	4.2192	7.71231	3.53654	5.64845	6.29572	2.43386	10.1273	6.79972	5.59949	0.232821	3.68245	6.57559	4.54076	6.26231	4.613	0.910985	6.25264	9.32745	1.32317	1.3986	-1.0785	2.79857	7.59955	9.65345	4.42998	-3.61671	2.24243	2.73191	-0.26638	-0.539608	9.37043	0.138533	5.86634	6.27528
R_D_R_3	root	rhizotron	day	0.634042	1.22859	1.78023	3.87599	3.69686	3.08234	2.79475	-0.332421	13.72	2.77378	10.9732	1.50281	5.2664	11.753	3.68654	4.03897	5.208	2.03706	9.96205	5.82507	17.2715	0.0992826	3.37849	11.905	4.04933	5.39674	4.52361	0.278124	5.25405	9.19069	0.929657	0.106567	-1.03388	3.0643	6.16258	9.19419	3.8941	-3.30056	2.63479	2.2764	0.207193	-0.363675	6.39745	0.178292	6.00327	5.30845
R_N_R_1	root	rhizotron	night	0.691464	1.44971	1.51677	3.74131	3.84324	3.47471	2.87533	-0.90395	9.41255	6.33873	6.81867	2.3536	4.69915	7.44552	2.88616	4.63157	5.91882	2.99856	9.99056	5.72206	12.964	-0.0928143	2.81478	9.47906	4.37487	6.04668	5.12678	0.830283	7.13385	8.26733	1.09018	0.789718	-1.53213	2.39276	5.43606	7.4704	4.50423	-3.90257	0.720191	2.92146	-2.23655	-0.747289	6.70878	3.12923	6.27257	5.77928
R_N_R_2	root	rhizotron	night	0.218905	1.30545	0.740047	3.49511	4.0354	3.819	2.60293	-1.42999	10.9923	5.25969	7.73874	1.90791	4.85875	9.02531	2.85547	4.62952	4.62316	2.50357	10.0475	6.5048	14.5438	0.48723	2.73198	9.14171	4.73532	5.87789	4.05712	0.257631	6.57026	9.20386	0.782172	0.430988	-2.19134	3.11126	5.65179	9.43155	5.68467	-3.87725	0.509369	2.49143	-2.72149	-1.19043	7.17863	2.46332	6.15682	5.0331
R_N_R_3	root	rhizotron	night	0.504544	1.53137	1.33573	3.74883	4.01308	3.74515	2.61129	-1.15288	13.581	5.66597	9.94007	1.54502	5.04957	10.8757	3.25284	4.28079	5.36404	2.44209	10.6574	5.63279	17.1324	0.0188379	2.91115	9.4567	4.31819	5.20821	3.96424	0.229262	5.66615	7.98297	0.814762	0.114959	-1.9019	2.82977	5.76603	10.2238	4.30199	-3.46266	1.14583	2.30079	-3.25712	-0.611293	6.43517	2.96204	6.15628	5.45179
[truncated: 30 more columns]

## Sheet: Figure1-fs1 c,d
Sample	Growth_system	Shoot_FW	Shoot_Area	LR_number	PR_Length
49A-01	rhizotron	22.3	1.51	20	11.3
49A-02	rhizotron	38.4	2.46	25	12.5
49A-03	rhizotron	27.2	1.77	26	12.2
49A-04	rhizotron	23	1.58	16	10.5
49A-05	rhizotron	11.66	0.95	16	10.5
49A-06	rhizotron	17	1.15	18	11.5
49A-07	rhizotron	28.4	1.78	24	12.5
49A-08	rhizotron	22.4	1.47	16	10
49B-01	cylinder	18.7	1.57	13	7
49B-03	cylinder	23.3	2.05	12	8.5
49B-04	cylinder	27.1	1.69	14	8.8
49B-05	cylinder	16.4	1.05	12	7.6
49B-06	cylinder	27.4	1.7	16	10
49B-07	cylinder	19.7	1.34	14	8.9
49B-08	cylinder	22.8	1.51	13	8
49C-01	pot	25.6	1.54	16	5.2
49C-02	pot	24.9	1.51	15	3.6
49C-03	pot	28.3	1.49	14	4.3
49C-04	pot	32.4	1.93	13	3.9
49C-05	pot	11.7	0.78	11	3.3
49C-06	pot	16.3	1.12	14	3.8
49C-07	pot	28.4	1.77	17	4.6
49C-08	pot	21.6	1.24	13	4.1
49C-09	pot	23.4	1.34	12	3.4
49C-10	pot	27.7	1.48	14	4.7
49C-11	pot	25.6	1.39	18	4.1
49C-14	pot	14.7	0.82	14	3.4
49C-15	pot	9.9	0.64	13	2.7
49C-16	pot	20.1	1.09	13	4.2

## Sheet: FIgure1-fs1 e,f
Sample	growth_system	shoot_fw	leaf_area	pr_length
39A01	rhizotron	10.3	0.76	9.3
39A02	rhizotron	9.5	0.82	10.1
39A03	rhizotron	12.1	0.97	10.5
39A04	rhizotron	11.2	0.84	8.7
39A05	rhizotron	10.3	0.8	8.2
39A06	rhizotron	9.9	0.7	7.4
39A07	rhizotron	10	0.82	10.5
39C01	pot	15.6	0.69	5.84
39C02	pot	13	0.77	5.76
39C03	pot	11.6	0.74	3.17
39C04	pot	12.7	0.6	6.99
39C05	pot	21	0.79	7.27
39C06	pot	20.6	1.08	4.27
39C07	pot	8.5	0.57	4.64
39F01	MS	3	0.29	2.57
39F02	MS	7.1	0.59	2.45
39F03	MS	12.9	0.83	3.04
39F04	MS	0.8	0.6	1
39F05	MS	9.1	0.53	3.1
39F06	MS	9.5	0.47	4.81
